# Supplementary material for: Bidirectional promoter activity from expression cassettes can drive off-target repression of neighboring gene translation
Source: eLife. 2022 Dec 12;11:e81086. doi: 10.7554/eLife.81086 (PMC9754628; doi:10.7554/eLife.81086)
Supplement: Figure 1—source data 1. [file elife-81086-fig1-data1.xlsx]

## Sheet: description
RPKM values for genes quantified in mRNA-seq and ribosome profiling, genes with <50 raw counts were excluded from analysis
samples were collected after 4h in sporulation media

## Sheet: RPKM values
	Wildtype_mRNA	dbp1∆::KANMX6_mRNA	Wildtype_footprint	dbp1∆::KANMX6_footprint
Q0060 AI3 Endonuclease I-SceIII, encoded by a mobile group I intron within the mitochondrial COX1 gene	176.4	362.2	0	0.3
Q0065 AI4 Endonuclease I-SceII, encoded by a mobile group I intron within the mitochondrial COX1 gene; intron is normally spliced by the BI4p maturase but AI4p can mutate to acquire the same maturase activity	42	142.9	0	0.3
Q0110 BI2 Mitochondrial mRNA maturase with a role in splicing, encoded by both exon and intron sequences of partially processed COB mRNA	14.9	32.1	0	0.5
Q0275 COX3 Subunit III of cytochrome c oxidase, which is the terminal member of the mitochondrial inner membrane electron transport chain; one of three mitochondrially-encoded subunits	26.9	62.8	0	1.6
YAL042C-A	1.2	1.1	0	0.8
YAR029W	44	34.4	0	4.1
YBR196C-A	9.1	36.5	0	2.1
YCL023C	1.3	1.8	0	0.9
YCR100C	20.1	16.6	0	0.3
YCR102C	14.5	8.8	0	1.2
YDL026W	14.5	4.7	0	1
YDL062W	5.3	7.4	0	0.7
YDR003W-A	233.5	159.9	0	5
YDR048C	1.4	1.3	0	1.9
YDR102C	6.8	6.3	0	0.9
YDR157W	4.6	12.7	0	1.6
YDR246W-A	4.5	7.4	0	1.5
YDR525W API2 Dubious open reading frame, unlikely to encode a protein; not conserved in closely related Saccharomyces species; 26% of ORF overlaps the dubious ORF YDR524C-A; insertion mutation in a cdc34-2 mutant background causes altered bud morphology	4.1	0.6	0	2.8
YEL035C UTR5 Protein of unknown function; transcription may be regulated by Gcr1p	4.5	3.8	0	1.2
YER088C-A	12.6	22.5	0	1.2
YGL165C	3.9	6.1	0	0.5
YGR224W AZR1 Plasma membrane transporter of the major facilitator superfamily, involved in resistance to azole drugs such as ketoconazole and fluconazole	0.2	1.1	0	0.7
YGR296W;YLR467W	67.7	74.6	0	7.7
YHL041W	1	0.9	0	0.7
YHR007C-A	16.6	45.3	0	2.8
YHR032W-A	49.3	73.2	0	1.7
YIL012W	5.7	8	0	2.3
YIL071W-A	109.5	258	0	1.3
YIL123W;YIL123W	29.5	40.6	0	3.7
YJL027C	1.1	5	0	0.7
YJL213W	21.2	30.3	0	0.3
YKL071W	37.9	49.2	0	1.6
YKL096C-B	30.3	45	0	2.1
YKL136W	6.8	3.7	0	0.8
YKL177W	4	8	0	1.8
YKR035C OPI8 0	0.7	0.3	0	0.5
YLL020C	55.6	150	0	2.4
YLR322W VPS65 Dubious open reading frame, unlikely to encode a protein; not conserved in closely related Saccharomyces species; 75% of ORF overlaps the verified gene SFH1; deletion causes a vacuolar protein sorting defect	1.4	0.7	0	1.9
YLR428C	2.6	1.2	0	0.9
YLR463C	2.9	10.6	0	1.9
YML100W-A	2.6	1.2	0	1.8
YMR103C	304.4	181.5	0	0.8
YNL300W	1.5	3.4	0	2
YNR056C BIO5 Putative transmembrane protein involved in the biotin biosynthesis pathway; responsible for uptake of 7-keto 8-aminopelargonic acid; BIO5 is in a cluster of 3 genes (BIO3, BIO4, and BIO5) that mediate biotin synthesis	1.9	2.6	0	0.7
YOL106W	2.7	7.5	0	1.8
YOR247W;YOR248W	3.1	7.1	0	2.1
YOR325W	6.7	0.9	0	0.6
YOR364W	7.3	1.7	0	1.7
YOR387C	1.5	4.7	0	2
YOR394W;YPL282C	5.7	14.7	0	2
YPL136W	6.1	11.9	0	2.5
YPL119C-A	153.5	50.4	0.9	12.9
YPR108W-A	690.9	91.9	9.8	12.4
YOR379C	6.7	0.6	2.2	1.8
YKR013W PRY2 Protein of unknown function, has similarity to Pry1p and Pry3p and to the plant PR-1 class of pathogen related proteins	4	8.7	0.5	9.1
YDR241W BUD26 Dubious open reading frame, unlikely to encode a protein; not conserved in closely related Saccharomyces species; 1% of ORF overlaps the verified gene SNU56; diploid mutant displays a weak budding pattern phenotype in a systematic assay	3.1	0.7	1.7	3.2
YLR393W ATP10 Mitochondrial inner membrane protein required for assembly of the F0 sector of mitochondrial F1F0 ATP synthase, interacts genetically with ATP6	9.6	4.2	2.6	9.1
YHR210C	11.9	3.9	0.5	1.3
YEL059W	21	0.7	8.1	2
YLR101C	103.6	76	1.2	6.2
YMR151W YIM2 Dubious open reading frame, unlikely to encode a protein; not conserved in closely related Saccharomyces species; 5% of ORF overlaps the verified gene IMP1	5.1	1.9	1.1	2.8
YDL009C	12.5	0.6	6	1.9
YNL145W MFA2 Mating pheromone a-factor, made by a cells; interacts with alpha cells to induce cell cycle arrest and other responses leading to mating; biogenesis involves C-terminal modification, N-terminal proteolysis, and export; also encoded by MFA1	23.4	27.1	2.1	15.9
YHR145C	17.1	11.6	1.7	7.4
YJR039W	64.1	50.5	0.9	4.5
YLR328W NMA1 Nicotinic acid mononucleotide adenylyltransferase, involved in NAD(+) salvage pathway	20.5	19.2	1.8	10.4
YLR452C SST2 GTPase-activating protein for Gpa1p, regulates desensitization to alpha factor pheromone; also required to prevent receptor-independent signaling of the mating pathway; member of the RGS (regulator of G-protein signaling) family	8.3	17.5	0.1	1.3
YKL131W	3.4	2	0.5	1.8
YCR101C	17.3	9.6	1.4	4.7
YFL034C-A RPL22B Protein component of the large (60S) ribosomal subunit, has similarity to Rpl22Ap and to rat L22 ribosomal protein	102.6	292.1	2	33.6
YIL165C	51.4	59.3	1.4	9.4
YER190W;YGR296W;YJL225C;YNL339C	321.7	135.7	1.8	4.4
YER067C-A	4.2	0.6	2.3	1.9
YIL100C-A	6.4	0.6	8.3	4.4
YKL036C	2.3	0.5	1.9	2.3
YMR301C ATM1 Mitochondrial inner membrane transporter, exports mitochondrially synthesized precursors of iron-sulfur (Fe/S) clusters to the cytosol; member of the ATP-binding cassette (ABC) transporter family	7.6	7.3	0.8	4.1
YDL243C AAD4 Putative aryl-alcohol dehydrogenase with similarity to P. chrysosporium aryl-alcohol dehydrogenase, involved in the oxidative stress response	35.8	39.5	1.3	7.6
YAR050W FLO1 Lectin-like protein involved in flocculation, cell wall protein that binds to mannose chains on the surface of other cells, confers floc-forming ability that is chymotrypsin sensitive and heat resistant; similar to Flo5p	6.4	23.3	2.1	40.3
YFL020C PAU5 Part of 23-member seripauperin multigene family encoded mainly in subtelomeric regions, active during alcoholic fermentation, regulated by anaerobiosis, negatively regulated by oxygen, repressed by heme	41.4	29.5	0.8	3
YEL049W PAU2 Part of 23-member seripauperin multigene family encoded mainly in subtelomeric regions, active during alcoholic fermentation, regulated by anaerobiosis, negatively regulated by oxygen, repressed by heme	46.5	45.1	2.3	11.5
YKL120W OAC1 Mitochondrial inner membrane transporter, transports oxaloacetate, sulfate, and thiosulfate; member of the mitochondrial carrier family	11.1	24.2	1	11
YNL057W	42	55.9	0.7	4.6
YOR247W SRL1 Mannoprotein that exhibits a tight association with the cell wall, required for cell wall stability in the absence of GPI-anchored mannoproteins; has a high serine-threonine content; expression is induced in cell wall mutants	9.3	4.9	0.7	1.8
YKL163W;YKL164C	300.3	185.1	124.2	369.1
YBR121C;YBR121C-A	125.7	143.1	13.9	69.9
YBR092C;YBR093C	111.1	113.6	2.2	9.8
YFL057C;YJR155W	47.8	99.3	1.2	10.8
YGR203W	19.1	15	10.9	35.6
YOL151W GRE2 NADPH-dependent methylglyoxal reductase (D-lactaldehyde dehydrogenase); stress induced (osmotic, ionic, oxidative, heat shock and heavy metals); regulated by the HOG pathway	5.7	7.7	1.9	10.4
YEL068C	52.8	52.8	21.2	84.7
YGR254W;YHR174W	877.7	245.5	625.9	690
YEL077C;YFL066C;YHR218W;YIL177C;YLL067C;YNL339C;YOR396W	401.8	306.2	5.8	17.1
YOR009W TIR4 Cell wall mannoprotein of the Srp1p/Tip1p family of serine-alanine-rich proteins; expressed under anaerobic conditions and required for anaerobic growth; transcription is also induced by cold shock	30.4	41.3	0.8	4.2
YIL096C	8	23.9	0.7	7.9
YNL024C	2.4	1.7	0.3	0.8
YHR094C HXT1 Low-affinity glucose transporter of the major facilitator superfamily, expression is induced by Hxk2p in the presence of glucose and repressed by Rgt1p when glucose is limiting	2	0.4	0.8	0.6
YMR323W;YOR393W;YPL281C	43.6	32.1	9.7	26.1
YLR146W-A	40.8	30	33.6	88
YMR169C ALD3 Cytoplasmic aldehyde dehydrogenase, involved in beta-alanine synthesis; uses NAD+ as the preferred coenzyme; very similar to Ald2p; expression is induced by stress and repressed by glucose	32.8	33.7	1	3.6
YBR299W MAL32 Maltase (alpha-D-glucosidase), inducible protein involved in maltose catabolism; encoded in the MAL3 complex locus; functional in genomic reference strain S288C	213.5	128.1	4.2	8.7
YLL063C AYT1 Acetyltransferase; catalyzes trichothecene 3-O-acetylation, suggesting a possible role in trichothecene biosynthesis	11	14.8	0.7	3.2
YDR150W;YDR150W	178.1	113.6	78.8	168.6
YER190W;YGR296W	86.6	66	3.3	8.4
YLR303W MET17 O-acetyl homoserine-O-acetyl serine sulfhydrylase, required for sulfur amino acid synthesis	27.9	38.7	13.8	63.3
YBR116C;YBR117C	52.5	88.7	16	87.9
YLR164W	35.5	74.6	7.7	52.5
YJL078C PRY3 Protein of unknown function, has similarity to Pry1p and Pry2p and to the plant PR-1 class of pathogen related proteins	4.2	1.8	3.1	4.3
YNR071C	13.5	15.4	0.9	3.3
YBR213W MET8 Bifunctional dehydrogenase and ferrochelatase, involved in the biosynthesis of siroheme; also involved in the expression of PAPS reductase and sulfite reductase	6.5	4	7.3	14.4
YDL223C HBT1 Substrate of the Hub1p ubiquitin-like protein that localizes to the shmoo tip (mating projection); mutants are defective for mating projection formation, thereby implicating Hbt1p in polarized cell morphogenesis	206.2	114.3	79.6	141
YPL154C PEP4 Vacuolar aspartyl protease (proteinase A), required for the posttranslational precursor maturation of vacuolar proteinases; synthesized as a zymogen, self-activates	1838.8	1010.8	1036.8	1820.1
YGR271C-A	375.3	147.8	14	17.6
YGR201C	71	66.8	21.1	63.1
YAL063C;YAR050W	14.9	32.2	2.7	18.5
YLR367W RPS22B Protein component of the small (40S) ribosomal subunit; nearly identical to Rps22Ap and has similarity to E. coli S8 and rat S15a ribosomal proteins	58.1	229.1	8.8	109.9
YBR205W;YBR206W	99.7	111.1	31	109.4
YIR019C;YIR019C	4859.5	4382.8	3867.6	11024
YIR021W MRS1 Protein required for the splicing of two mitochondrial group I introns (BI3 in COB and AI5beta in COX1); forms a splicing complex, containing four subunits of Mrs1p and two subunits of the BI3-encoded maturase, that binds to the BI3 RNA	6.2	9.9	0.9	4.5
YLR044C;YLR134W	192.8	156	169.2	426.7
YDL081C RPP1A Ribosomal protein P1 alpha, a component of the ribosomal stalk, which is involved in the interaction between translational elongation factors and the ribosome; accumulation of P1 in the cytoplasm is regulated by phosphorylation and interaction with the P2 stalk component	451.3	521.1	103.8	372.6
YHR137C-A	44.9	6.7	1.1	0.5
YLR040C	2.7	7.1	0.4	3.2
YKR050W TRK2 Component of the Trk1p-Trk2p potassium transport system	22.4	20.7	5.3	14.9
YIL110W	31.1	52.7	4.7	24.1
YGR272C	157.6	109	12.1	25.3
YDR150W;YDR150W;YDR150W	270.7	176.2	152.4	293.8
YDR249C	34.4	24.7	4.1	8.7
YNL133C FYV6 Protein of unknown function, required for survival upon exposure to K1 killer toxin; proposed to regulate double-strand break repair via non-homologous end-joining	20.7	31.6	3.3	14.7
YJL172W CPS1 Vacuolar carboxypeptidase yscS; expression is induced under low-nitrogen conditions	148.4	82.5	113.2	182.6
YOR192C	11	14.1	0.7	2.6
YNR058W BIO3 7,8-diamino-pelargonic acid aminotransferase (DAPA), catalyzes the second step in the biotin biosynthesis pathway; BIO3 is in a cluster of 3 genes (BIO3, BIO4, and BIO5) that mediate biotin synthesis	23.3	32.3	1	4
YOR012W;YOR013W	35.3	40	6	19.5
YNL078W NIS1 Protein localized in the bud neck at G2/M phase; physically interacts with septins; possibly involved in a mitotic signaling network	8.9	12.2	1.4	5.5
YBL020W RFT1 Flippase, essential integral membrane protein that is required for translocation of Man5GlcNac2-PP-Dol from the cytoplasmic side to the lumenal side of the ER membrane; mutation is suppressed by expression human p53 protein	37.5	39.8	4.9	14.9
YKL164C PIR1 O-glycosylated protein required for cell wall stability; attached to the cell wall via beta-1,3-glucan; mediates mitochondrial translocation of Apn1p; expression regulated by the cell integrity pathway and by Swi5p during the cell cycle	50.7	19	14.3	15.3
YJL052W TDH1 Glyceraldehyde-3-phosphate dehydrogenase, isozyme 1, involved in glycolysis and gluconeogenesis; tetramer that catalyzes the reaction of glyceraldehyde-3-phosphate to 1,3 bis-phosphoglycerate; detected in the cytoplasm and cell-wall	133	47.3	50.1	50.7
YCL036W GFD2 Protein of unknown function, identified as a high-copy suppressor of a dbp5 mutation	5.8	17	0.3	2.5
YDR216W ADR1 Carbon source-responsive zinc-finger transcription factor, required for transcription of the glucose-repressed gene ADH2, of peroxisomal protein genes, and of genes required for ethanol, glycerol, and fatty acid utilization	206.9	113.8	72.3	112.2
YDR278C	220.6	132.9	17.8	30.2
YOL023W IFM1 Mitochondrial translation initiation factor 2	19.7	13	2.1	3.9
YNL339C YRF1-6 Helicase encoded by the Y' element of subtelomeric regions, highly expressed in the mutants lacking the telomerase component TLC1; potentially phosphorylated by Cdc28p	121.5	90.7	1.1	2.3
YDR126W SWF1 Palmitoyltransferase that acts on the SNAREs Snc1p, Syn8p, Tlg1p and likely on all SNAREs; member of a family of putative palmitoyltransferases containing an Asp-His-His-Cys-cysteine rich (DHHC-CRD) domain; may have a role in vacuole fusion	11.6	19.4	2.4	11.2
YDR488C PAC11 Dynein intermediate chain, acts in the cytoplasmic dynein pathway, forms cortical cytoplasmic microtubule capture site with Num1p; null mutant is defective in nuclear migration, essential in the absence of CIN8	58.7	40.3	10	19.1
YNL152W	9.9	9.3	6.3	16.4
YFL056C AAD6 Putative aryl-alcohol dehydrogenase with similarity to P. chrysosporium aryl-alcohol dehydrogenase, involved in the oxidative stress response	36.3	65.4	2.7	13.4
YDR503C LPP1 Lipid phosphate phosphatase, catalyzes Mg(2+)-independent dephosphorylation of phosphatidic acid (PA), lysophosphatidic acid, and diacylglycerol pyrophosphate; involved in control of the cellular levels of phosphatidylinositol and PA	39.8	43.5	20.3	61.1
YAL002W VPS8 Membrane-associated hydrophilic protein that interacts with the small GTPase, Vps21p, to facilitate soluble vacuolar protein localization; required for localization and trafficking of the CPY sorting receptor; contains a RING finger motif	10	11.1	1.8	5.5
YPR150W	5.2	2.4	3.7	4.7
YPR108W-A;YPR108W-A	8.2	6.3	4.4	9.3
YEL036C ANP1 Subunit of the alpha-1,6 mannosyltransferase complex; type II membrane protein; has a role in retention of glycosyltransferases in the Golgi; involved in osmotic sensitivity and resistance to aminonitrophenyl propanediol	18.4	24.2	3.4	12.3
YIR019C MUC1 GPI-anchored cell surface glycoprotein required for diploid pseudohyphal formation and haploid invasive growth, transcriptionally regulated by the MAPK pathway (via Ste12p and Tec1p) and the cAMP pathway (via Flo8p)	1731.2	1745.6	2001.7	5528.9
YKL220C FRE2 Ferric reductase and cupric reductase, reduces siderophore-bound iron and oxidized copper prior to uptake by transporters; expression induced by low iron levels but not by low copper levels	13.3	14.6	0.2	0.6
YFL058W THI5 Protein involved in synthesis of the thiamine precursor hydroxymethylpyrimidine (HMP); member of a subtelomeric gene family including THI5, THI11, THI12, and THI13	19.8	18.4	9.3	23.6
YFR051C RET2 Delta subunit of the coatomer complex (COPI), which coats Golgi-derived transport vesicles; involved in retrograde transport between Golgi and ER	38.3	26.9	71.7	136.9
YDR169C-A	15	2.8	8.1	4.1
YKR104W	13.2	19.5	0.5	2
YIL101C XBP1 Transcriptional repressor that binds to promoter sequences of the cyclin genes, CYS3, and SMF2; expression is induced by stress or starvation during mitosis, and late in meiosis; member of the Swi4p/Mbp1p family; potential Cdc28p substrate	36	17.9	39.4	52.3
YOL159C	62.4	48.9	3.6	7.4
YDR524C AGE1 ADP-ribosylation factor (ARF) GTPase activating protein (GAP) effector, involved in the secretory and endocytic pathways; contains C2C2H2 cysteine/histidine motif	25.4	25.9	3	8
Q0070 AI5_ALPHA Endonuclease I-SceIV, involved in intron mobility; encoded by a mobile group I intron within the mitochondrial COX1 gene	146	260.7	0.3	1.4
YMR009W ADI1 Acireductone dioxygenease involved in the methionine salvage pathway; ortholog of human MTCBP-1	355.1	208.4	108.7	166
YCR059C YIH1 Protein that inhibits activation of Gcn2p, an eIF2 alpha subunit protein kinase, by competing for Gcn1p binding, thus impacting gene expression in response to starvation; has sequence and functional similarity to the mouse IMPACT gene	23.1	36.2	8.7	35.4
YJL211C	1	0.9	0.6	1.4
YAL037W	22.4	39.4	1.5	6.8
YLR438W CAR2 L-ornithine transaminase (OTAse), catalyzes the second step of arginine degradation, expression is dually-regulated by allophanate induction and a specific arginine induction process; not nitrogen catabolite repression sensitive	152.5	124.4	480.5	1010.1
YIR020C	54	30.6	10.5	15.3
YKR032W	1.4	1.3	0.8	1.9
YGL022W STT3 Subunit of the oligosaccharyltransferase complex of the ER lumen, which catalyzes asparagine-linked glycosylation of newly synthesized proteins; forms a subcomplex with Ost3p and Ost4p and is directly involved in catalysis	115.9	90.8	75.4	151
YPL270W MDL2 Half-type ATP-binding cassette (ABC) transporter of the inner mitochondrial membrane	23	25.6	10.8	30.6
YIR034C LYS1 Saccharopine dehydrogenase (NAD+, L-lysine-forming), catalyzes the conversion of saccharopine to L-lysine, which is the final step in the lysine biosynthesis pathway	27.2	14.3	44	58.8
YBR162C TOS1 Covalently-bound cell wall protein of unknown function; identified as a cell cycle regulated SBF target gene; deletion mutants are highly resistant to treatment with beta-1,3-glucanase; has sequence similarity to YJL171C	69.6	58.3	6.5	13.8
YDR483W KRE2 Alpha1,2-mannosyltransferase of the Golgi involved in protein mannosylation	183.8	137.5	89.8	170
YHR214C-E	2.5	1.4	1.2	1.7
YDR512C EMI1 Non-essential protein of unknown function required for transcriptional induction of the early meiotic-specific transcription factor IME1, also required for sporulation	35.8	48	21	70.9
YCL026C-B	5.4	2.9	11.7	15.8
YBR229C ROT2 Glucosidase II catalytic subunit required for normal cell wall synthesis; mutations in rot2 suppress tor2 mutations, and are synthetically lethal with rot1 mutations	24.9	20.7	21.4	44.7
YLR294C	135.4	184.3	2.4	8.2
YMR300C ADE4 Phosphoribosylpyrophosphate amidotransferase (PRPPAT; amidophosphoribosyltransferase), catalyzes first step of the 'de novo' purine nucleotide biosynthetic pathway	72.4	84.5	32.7	95.4
YOR066W	13.5	12.5	11.5	26.6
YMR175W SIP18 Protein of unknown function whose expression is induced by osmotic stress	450.3	625.9	157.4	545.5
YPL264C	8	11.8	1.8	6.6
YHR178W STB5 Activator of multidrug resistance genes, forms a heterodimer with Pdr1p; contains a Zn(II)2Cys6 zinc finger domain that interacts with a PDRE (pleotropic drug resistance element) in vitro; binds Sin3p in a two-hybrid assay	4.8	6.6	1.2	4.1
YKL113C RAD27 5' to 3' exonuclease, 5' flap endonuclease, required for Okazaki fragment processing and maturation as well as for long-patch base-excision repair; member of the S. pombe RAD2/FEN1 family	30.1	47.3	5.1	19.9
YOR391C;YPL280W	13.3	22.3	2.5	10.4
YNL304W YPT11 Rab-type small GTPase that interacts with the C-terminal tail domain of Myo2p to mediate distribution of mitochondria to daughter cells	8.5	10.3	4.2	12.6
YNL311C SKP2 F-box protein	6.7	5.1	1.7	3.2
YIL058W	15.8	5.1	6.8	5.4
YCL009C ILV6 Regulatory subunit of acetolactate synthase, which catalyzes the first step of branched-chain amino acid biosynthesis; enhances activity of the Ilv2p catalytic subunit, localizes to mitochondria	141.1	119	217.2	447
YDL182W LYS20 Homocitrate synthase isozyme, catalyzes the condensation of acetyl-CoA and alpha-ketoglutarate to form homocitrate, which is the first step in the lysine biosynthesis pathway; highly similar to the other isozyme, Lys21p	30.5	37.5	41.3	123.1
YGL194C-A	44.7	69.9	11	41.7
YPL036W PMA2 Plasma membrane H+-ATPase, isoform of Pma1p, involved in pumping protons out of the cell; regulator of cytoplasmic pH and plasma membrane potential	15.7	32.3	7.9	39.4
YHL032C GUT1 Glycerol kinase, converts glycerol to glycerol-3-phosphate; glucose repression of expression is mediated by Adr1p and Ino2p-Ino4p; derepression of expression on non-fermentable carbon sources is mediated by Opi1p and Rsf1p	53.7	45.1	8.6	17.5
YER091C MET6 Cobalamin-independent methionine synthase, involved in amino acid biosynthesis; requires a minimum of two glutamates on the methyltetrahydrofolate substrate, similar to bacterial metE homologs	74.6	94.2	84.3	257.6
YGR062C COX18 Mitochondrial inner membrane protein, required for export of the Cox2p C terminus from the mitochondrial matrix to the intermembrane space during its assembly into cytochrome c oxidase; similar to Oxa2p of N. crassa	13.7	14	2.5	6.1
YIL164C NIT1 Nitrilase, member of the widely found nitrilase branch (EC:3.5.5.1) of the nitrilase superfamily	36.9	37.3	4.9	11.8
YLR044C PDC1 Major of three pyruvate decarboxylase isozymes, key enzyme in alcoholic fermentation, decarboxylates pyruvate to acetaldehyde; subject to glucose-, ethanol-, and autoregulation; involved in amino acid catabolism	160.4	126.3	159.6	299
YIR010W DSN1 Essential component of the MIND kinetochore complex (Mtw1p Including Nnf1p-Nsl1p-Dsn1p) which joins kinetochore subunits contacting DNA to those contacting microtubules; important for chromosome segregation	51.3	38.2	19.8	35
YHR218W	99.1	32.2	360.5	277.8
YOR130C ORT1 Ornithine transporter of the mitochondrial inner membrane, exports ornithine from mitochondria as part of arginine biosynthesis; human ortholog is associated with hyperammonaemia-hyperornithinaemia-homocitrullinuria (HHH) syndrome	13.3	26.6	1.9	9
YGR192C;YJR009C	1202.3	976.7	820.1	1576.8
YGR121C MEP1 Ammonium permease; belongs to a ubiquitous family of cytoplasmic membrane proteins that transport only ammonium (NH4+); expression is under the nitrogen catabolite repression regulation	258.1	144.4	127.5	168.2
YPR138C MEP3 Ammonium permease of high capacity and low affinity; belongs to a ubiquitous family of cytoplasmic membrane proteins that transport only ammonium (NH4+); expression is under the nitrogen catabolite repression regulation ammonia permease	13.7	42.7	2.6	19.1
YNL160W YGP1 Cell wall-related secretory glycoprotein; induced by nutrient deprivation-associated growth arrest and upon entry into stationary phase; may be involved in adaptation prior to stationary phase entry; has similarity to Sps100p	124	445	55.7	470.8
YMR006C PLB2 Phospholipase B (lysophospholipase) involved in phospholipid metabolism; displays transacylase activity in vitro; overproduction confers resistance to lysophosphatidylcholine	26.3	59.9	4.3	23
YDL124W	70.8	133.4	24.5	108
YNL198C	6.3	7.3	16.9	45.8
YGR279C SCW4 Cell wall protein with similarity to glucanases; scw4 scw10 double mutants exhibit defects in mating	379.3	232.2	46.9	67.1
YBR013C	53.4	48.5	25	52.9
YDL052C SLC1 1-acyl-sn-gylcerol-3-phosphate acyltransferase, catalyzes the acylation of lysophosphatidic acid to form phosphatidic acid, a key intermediate in lipid metabolism; located in lipid particles and endoplasmic reticulum	27.6	32.7	13.8	37.8
YLL035W GRC3 Protein of unknown function, required for cell growth and possibly involved in rRNA processing; mRNA is cell cycle regulated	3.3	4.8	1.4	4.7
YIL177C;YLL066C;YNL339C	583.5	427.4	8.7	14.7
YPR149W NCE102 Protein of unknown function; contains transmembrane domains; involved in secretion of proteins that lack classical secretory signal sequences; component of the detergent-insoluble glycolipid-enriched complexes (DIGs)	4683.9	4175.9	2919.5	5997.5
YER089C PTC2 Type 2C protein phosphatase; dephosphorylates Hog1p to limit maximal osmostress induced kinase activity; dephosphorylates Ire1p to downregulate the unfolded protein response; dephosphorylates Cdc28p; role in DNA checkpoint inactivation	31.2	44.7	14.6	48
YDR293C SSD1 Protein with a role in maintenance of cellular integrity, interacts with components of the TOR pathway; ssd1 mutant of a clinical S. cerevisiae strain displays elevated virulence	152.4	113.8	67.3	115
YBR072W HSP26 Small heat shock protein with chaperone activity that is regulated by a heat induced transition from an inactive oligomeric (24-mer) complex to an active dimer; induced by heat, upon entry into stationary phase, and during sporulation	717.7	242.7	258.6	200
YMR310C	15.1	25.3	4.1	15.7
YJR075W HOC1 Alpha-1,6-mannosyltransferase involved in cell wall mannan biosynthesis; subunit of a Golgi-localized complex that also contains Anp1p, Mnn9p, Mnn11p, and Mnn10p; identified as a suppressor of a cell lysis sensitive pkc1-371 allele	23.8	45	9	38.7
YHR174W ENO2 Enolase II, a phosphopyruvate hydratase that catalyzes the conversion of 2-phosphoglycerate to phosphoenolpyruvate during glycolysis and the reverse reaction during gluconeogenesis; expression is induced in response to glucose	134.7	62.8	127	133.8
YNR034W SOL1 Protein with a possible role in tRNA export; shows similarity to 6-phosphogluconolactonase non-catalytic domains but does not exhibit this enzymatic activity; homologous to Sol2p, Sol3p, and Sol4p	523.4	69.7	232.9	69.9
YJL167W ERG20 Farnesyl pyrophosphate synthetase, has both dimethylallyltranstransferase and geranyltranstransferase activities; catalyzes the formation of C15 farnesyl pyrophosphate units for isoprenoid and sterol biosynthesis	85.7	61.4	31.6	51
YJL219W;YOL156W	35	32.9	13.3	28
YDR093W;YDR094W	35.4	20.1	5.2	6.6
YOL003C PFA4 Palmitoyltransferase with autoacylation activity; member of a family of putative palmitoyltransferases containing an Asp-His-His-Cys-cysteine rich (DHHC-CRD) domain	29.6	46.2	7.9	27.4
YJR059W PTK2 Putative serine/threonine protein kinase involved in regulation of ion transport across plasma membrane; enhances spermine uptake	20.8	14.2	9.5	14.4
YNR061C	88.6	94.2	48.1	113
YGL125W MET13 Isozyme of methylenetetrahydrofolate reductase, catalyzes the reduction of 5,10-methylenetetrahydrofolate to 5-methyltetrahydrofolate in the methionine biosynthesis pathway	38.1	32	36.1	66.8
YPR011C	23.8	22.1	4.4	9
YER061C CEM1 Mitochondrial beta-keto-acyl synthase with possible role in fatty acid synthesis; required for mitochondrial respiration	47	47.5	29	64.5
YCL001W-A	11.7	10.9	4.2	8.6
YKL128C PMU1 Putative phosphomutase, contains a region homologous to the active site of phsophomutases; overexpression of the gene suppresses the histidine auxotrophy of an ade3 ade16 ade17 triple mutant and the temperature sensitivity of a tps2 mutant	1.5	3.5	0.8	4.1
YOR314W	10.9	7	6.6	9.3
YGL179C TOS3 Protein kinase, related to and functionally redundant with Elm1p and Sak1p for the phosphorylation and activation of Snf1p; functionally orthologous to LKB1, a mammalian kinase associated with Peutz-Jeghers cancer-susceptibility syndrome	6.9	8	5	12.7
YLR058C SHM2 Cytosolic serine hydroxymethyltransferase, involved in one-carbon metabolism	184.4	160.9	86.7	165.4
YLR286C CTS1 Endochitinase, required for cell separation after mitosis; transcriptional activation during late G and early M cell cycle phases is mediated by transcription factor Ace2p	14.4	19.8	0.3	0.9
YBR191W RPL21A Protein component of the large (60S) ribosomal subunit, nearly identical to Rpl21Bp and has similarity to rat L21 ribosomal protein	214.3	438	21.5	95.7
YLR214W FRE1 Ferric reductase and cupric reductase, reduces siderophore-bound iron and oxidized copper prior to uptake by transporters; expression induced by low copper and iron levels	76.9	141.8	12.8	51.2
YKL123W;YKL124W	85.6	54.2	37.8	51.9
YLR137W	30.9	22.5	11.4	18
YPR117W	20.3	18.8	0.1	0.2
YER017C AFG3 Component, with Yta12p, of the mitochondrial inner membrane m-AAA protease that mediates degradation of misfolded or unassembled proteins and is also required for correct assembly of mitochondrial enzyme complexes	58.4	54.3	38.7	77.7
YBR006W UGA2 Succinate semialdehyde dehydrogenase involved in the utilization of gamma-aminobutyrate (GABA) as a nitrogen source; part of the 4-aminobutyrate and glutamate degradation pathways; localized to the cytoplasm	61	39.7	34.3	48.2
YMR323W;YOR393W	93	39.3	21.4	19.5
YPL016W SWI1 One of 11 subunits of the SWI/SNF chromatin remodeling complex that regulates transcription by remodeling chromosomes; required for transcription of many genes, including ADH1, ADH2, GAL1, HO, INO1 and SUC2	70.2	58.3	31.9	57.1
YDR154C;YDR155C	878.2	768	909.3	1711.8
YLR105C SEN2 Subunit of the tRNA splicing endonuclease, which is composed of Sen2p, Sen15p, Sen34p, and Sen54p; Sen2p contains the active site for tRNA 5' splice site cleavage and has similarity to Sen34p and to Archaeal tRNA splicing endonuclease	17	34.7	4.1	18
YGL178W MPT5 Protein that specifically binds to mRNAs encoding chromatin modifiers and spindle pole body components; has roles in longevity, in maintenance of cell wall integrity, and in sensitivity to and recovery from pheromone arrest	99.1	87.5	69.5	131.9
YPL058C PDR12 Plasma membrane weak-acid-inducible ATP-binding cassette (ABC) transporter, required for weak organic acid resistance, strongly induced by sorbate and benzoate, regulated by War1p, mutants exhibit sorbate hypersensitivity	28	23.6	0.5	0.9
YBR218C;YGL062W	478.1	337.6	428.1	637.2
YAR071W PHO11 One of three repressible acid phosphatases, a glycoprotein that is transported to the cell surface by the secretory pathway; induced by phosphate starvation and coordinately regulated by PHO4 and PHO2	22.5	13.9	2	2.6
YOR034C AKR2 Ankyrin repeat-containing protein similar to Akr1p; member of a family of putative palmitoyltransferases containing an Asp-His-His-Cys-cysteine rich (DHHC-CRD) domain; possibly involved in constitutive endocytosis of Ste3p	51.3	52.1	12.7	27.1
YDL156W	15.7	15.8	10.5	22.2
YDL085W NDE2 Mitochondrial external NADH dehydrogenase, catalyzes the oxidation of cytosolic NADH; Nde1p and Nde2p are involved in providing the cytosolic NADH to the mitochondrial respiratory chain	247.3	262.1	147.1	327.1
YGR254W ENO1 Enolase I, a phosphopyruvate hydratase that catalyzes the conversion of 2-phosphoglycerate to phosphoenolpyruvate during glycolysis and the reverse reaction during gluconeogenesis; expression is repressed in response to glucose	547.5	168.1	499.2	321.5
YLR459W GAB1 GPI transamidase subunit, involved in attachment of glycosylphosphatidylinositol (GPI) anchors to proteins; may have a role in recognition of the attachment signal or of the lipid portion of GPI	61.4	72.3	29.2	72.1
YOL112W MSB4 GTPase-activating protein of the Ras superfamily that acts primarily on Sec4p, localizes to the bud site and bud tip, has similarity to Msb3p; msb3 msb4 double mutation causes defects in secretion and actin organization	75.9	103.8	6.7	19.2
YNL213C	43.9	48.2	6.8	15.6
YDR050C TPI1 Triose phosphate isomerase, abundant glycolytic enzyme; mRNA half-life is regulated by iron availability; transcription is controlled by activators Reb1p, Gcr1p, and Rap1p through binding sites in the 5' non-coding region	609.8	483.1	301.7	499.1
YOR288C MPD1 Member of the protein disulfide isomerase (PDI) family; overexpression suppresses the defect in maturation of carboxypeptidase Y, and defects in other essential Pdi1p functions, caused by PDI1 deletion	43.2	32	28.1	43.4
YJR057W CDC8 Thymidylate and uridylate kinase, functions in de novo biosynthesis of pyrimidine deoxyribonucleotides; converts dTMP to dTDP and dUMP to dUTP; essential for mitotic and meiotic DNA replication; homologous to S. pombe Tmp1p	72.6	81.1	25.3	58.7
YNL328C MDJ2 Protein of the mitochondrial inner membrane; function partially overlaps that of Mdj1p, which is a chaperone involved in folding of mitochondrially synthesized proteins in the mitochondrial matrix; member of the DnaJ family	14.3	8.1	16.5	19.4
YLR108C	14.8	28.4	5.3	21.1
YHR180W-A	214.4	90.3	19.8	17.3
YJL041W;YJL041W	113.8	97.8	241.7	429.9
YJL141C;YJL142C	160.6	118.1	43.8	66.5
YMR282C AEP2 Mitochondrial protein, likely involved in translation of the mitochondrial OLI1 mRNA; exhibits genetic interaction with the OLI1 mRNA 5'-untranslated leader	16.7	26.3	2.8	9.1
YHL038C CBP2 Mitochondrial protein required for splicing of the group I intron aI5 of the COB pre-mRNA, binds to the RNA to promote splicing; also involved in but not essential for splicing of the COB bI2 intron and the intron in the 21S rRNA gene	13.8	20.9	5.9	18.4
YML073C RPL6A N-terminally acetylated protein component of the large (60S) ribosomal subunit, has similarity to Rpl6Bp and to rat L6 ribosomal protein; binds to 5.8S rRNA	199.9	371.9	58.4	223.5
YCR068W ATG15 Lipase, required for intravacuolar lysis of autophagic bodies; located in the endoplasmic reticulum membrane and targeted to intravacuolar vesicles during autophagy via the multivesicular body (MVB) pathway	37.1	31.6	32.2	56.4
YOL051W;YOL051W	53.7	49	51	95.6
YDR011W SNQ2 ABC transporter protein involved in multidrug resistance and resistance to singlet oxygen species	46.2	48.2	14.9	31.9
YLR304C ACO1 Aconitase, required for the tricarboxylic acid (TCA) cycle and also independently required for mitochondrial genome maintenance; component of the mitochondrial nucleoid; mutation leads to glutamate auxotrophy	936.1	799	1304.3	2283.4
YPR160W GPH1 Non-essential glycogen phosphorylase required for the mobilization of glycogen, activity is regulated by cyclic AMP-mediated phosphorylation, expression is regulated by stress-response elements and by the HOG MAP kinase pathway	217.2	276.9	70.5	184
YPL038W MET31 Zinc-finger DNA-binding protein, involved in regulating expression of the methionine biosynthetic genes, similar to Met32p	85.1	62.6	25.9	39
YFL062W;YGR295C	296	253.8	95.1	166.6
YIR035C	35.3	33.3	7.9	15.2
YMR058W FET3 Ferro-O2-oxidoreductase required for high-affinity iron uptake and involved in mediating resistance to copper ion toxicity, belongs to class of integral membrane multicopper oxidases	46.3	3.9	39	6.7
YGR282C BGL2 Endo-beta-1,3-glucanase, major protein of the cell wall, involved in cell wall maintenance	849.7	830.2	331.9	660.4
YDR382W RPP2B Ribosomal protein P2 beta, a component of the ribosomal stalk, which is involved in the interaction between translational elongation factors and the ribosome; regulates the accumulation of P1 (Rpp1Ap and Rpp1Bp) in the cytoplasm	371.9	428.8	235	551
YMR120C ADE17 Enzyme of 'de novo' purine biosynthesis containing both 5-aminoimidazole-4-carboxamide ribonucleotide transformylase and inosine monophosphate cyclohydrolase activities, isozyme of Ade16p; ade16 ade17 mutants require adenine and histidine	102.2	85.3	27.9	47.3
YKL201C MNN4 Putative positive regulator of mannosylphosphate transferase (Mnn6p), involved in mannosylphosphorylation of N-linked oligosaccharides; expression increases in late-logarithmic and stationary growth phases	136.1	104.6	42.5	66.2
YOR026W BUB3 Kinetochore checkpoint WD40 repeat protein that localizes to kinetochores during prophase and metaphase, delays anaphase in the presence of unattached kinetochores; forms complexes with Mad1p-Bub1p and with Cdc20p, binds Mad2p and Mad3p	65.7	81.3	24.1	60.4
YAR015W ADE1 N-succinyl-5-aminoimidazole-4-carboxamide ribotide (SAICAR) synthetase, required for 'de novo' purine nucleotide biosynthesis; red pigment accumulates in mutant cells deprived of adenine	158.1	183.8	66	155.2
YEL072W RMD6 Protein required for sporulation	29.1	28.8	2.4	4.8
YMR040W YET2 Endoplasmic reticulum transmembrane protein, homolog of human BAP31 protein	183.7	132.3	26.6	38.7
YOL007C	13.6	11.8	1.2	2.1
YNL035C	10	17.6	9.5	33.7
YGR021W	11.3	12.9	4.7	10.8
YMR269W	26.3	36.6	5	14
YLR378C SEC61 Essential subunit of Sec61 complex (Sec61p, Sbh1p, and Sss1p); forms a channel for SRP-dependent protein import and retrograde transport of misfolded proteins out of the ER; with Sec63 complex allows SRP-independent protein import into ER	80.9	83.2	100.6	208.1
YOR396W	71.3	44.1	3.7	4.6
YOR224C RPB8 RNA polymerase subunit ABC14.5, common to RNA polymerases I, II, and III	74.6	126.5	20.4	69.4
YHR080C	17.6	16.8	2.3	4.4
YIL146C ECM37 Non-essential protein of unknown function	338.9	208.2	271.3	333.6
YJR004C SAG1 Alpha-agglutinin of alpha-cells, binds to Aga1p during agglutination, N-terminal half is homologous to the immunoglobulin superfamily and contains binding site for a-agglutinin, C-terminal half is highly glycosylated and contains GPI anchor	17.5	24.1	0.4	1.1
YCR048W ARE1 Acyl-CoA:sterol acyltransferase, isozyme of Are2p; endoplasmic reticulum enzyme that contributes the major sterol esterification activity in the absence of oxygen	5.9	5.2	4.1	7.2
YMR155W	54.9	63.1	9.1	20.8
YOR343C	20.7	13.4	0.7	0.9
YGL035C MIG1 Transcription factor involved in glucose repression; C2H2 zinc finger protein similar to mammalian Egr and Wilms tumor proteins	16	28.5	6.9	24.4
YLR180W SAM1 S-adenosylmethionine synthetase, catalyzes transfer of the adenosyl group of ATP to the sulfur atom of methionine; one of two differentially regulated isozymes (Sam1p and Sam2p)	50.1	68.4	34.8	94.3
YKR074W	132.8	138.4	61.7	127.5
YHR071W PCL5 Cyclin, interacts with Pho85p cyclin-dependent kinase (Cdk), induced by Gcn4p at level of transcription, specifically required for Gcn4p degradation, may be sensor of cellular protein biosynthetic capacity	287.5	199.3	12.6	17.3
YGL006W PMC1 Vacuolar Ca2+ ATPase involved in depleting cytosol of Ca2+ ions; prevents growth inhibition by activation of calcineurin in the presence of elevated concentrations of calcium	218.4	83.1	65.2	49.1
YLL023C	104.4	112.7	105.3	224.4
YMR088C VBA1 Permease of basic amino acids in the vacuolar membrane	25.8	41.1	7.2	22.6
YNL108C	16	26.4	2.1	6.8
YOR151C RPB2 RNA polymerase II second largest subunit B150, part of central core; similar to bacterial beta subunit	65.8	58.3	13.7	23.8
YFL039C ACT1 Actin, structural protein involved in cell polarization, endocytosis, and other cytoskeletal functions	962.6	773.3	840.1	1320.9
YHR180W	36.1	37.3	5	10.1
YLR300W EXG1 Major exo-1,3-beta-glucanase of the cell wall, involved in cell wall beta-glucan assembly; exists as three differentially glycosylated isoenzymes	104.7	103.9	29.1	56.4
YDL146W LDB17 Protein of unknown function; GFP-fusion protein localizes to the cell periphery, cytoplasm, bud, and bud neck; null mutant shows a reduced affinity for the alcian blue dye suggesting a decreased net negative charge of the cell surface	27.7	27.7	2	3.9
YJL082W IML2 Protein of unknown function, green fluorescent protein (GFP)-fusion protein localizes to the cytoplasm and nucleus	33.9	34.2	31.3	61.4
YMR087W	31.5	27.1	12.2	20.4
YKR039W GAP1 General amino acid permease; localization to the plasma membrane is regulated by nitrogen source	400.1	353.9	228.3	391
YGL008C PMA1 Plasma membrane H+-ATPase, pumps protons out of the cell; major regulator of cytoplasmic pH and plasma membrane potential; part of the P2 subgroup of cation-transporting ATPases	187.8	231.2	116.7	277.5
YGR026W	88.6	110.4	59.6	143.4
YDL069C CBS1 Mitochondrial translational activator of the COB mRNA; membrane protein that interacts with translating ribosomes, acts on the COB mRNA 5'-untranslated leader	32.6	38.7	9.1	20.8
YPR083W MDM36 Protein required for normal mitochondrial morphology and inheritance	34.3	41.4	6.5	15.1
YGL167C PMR1 High affinity Ca2+/Mn2+ P-type ATPase required for Ca2+ and Mn2+ transport into Golgi; involved in Ca2+ dependent protein sorting and processing; mutations in human homolog ATP2C1 cause acantholytic skin condition Hailey-Hailey disease	51	24.6	15	13.9
YER164W CHD1 Nucleosome remodeling factor that functions in regulation of transcription elongation; contains a chromo domain, a helicase domain and a DNA-binding domain; component of both the SAGA and SILK complexes	45	20.9	18.8	16.7
YAL038W CDC19 Pyruvate kinase, functions as a homotetramer in glycolysis to convert phosphoenolpyruvate to pyruvate, the input for aerobic (TCA cycle) or anaerobic (glucose fermentation) respiration	109.4	133.1	144.3	335.4
YBR241C	45.6	43.3	52	94.2
YOL135C MED7 Subunit of the RNA polymerase II mediator complex; associates with core polymerase subunits to form the RNA polymerase II holoenzyme; essential for transcriptional regulation	102.9	96.1	12.3	21.9
YIL019W FAF1 Protein required for pre-rRNA processing and 40S ribosomal subunit assembly	17.7	33.6	4.7	17
YAL007C ERP2 Protein that forms a heterotrimeric complex with Erp1p, Emp24p, and Erv25p; member, along with Emp24p and Erv25p, of the p24 family involved in ER to Golgi transport and localized to COPII-coated vesicles	50	90.2	19.1	65.6
YJL121C RPE1 D-ribulose-5-phosphate 3-epimerase, catalyzes a reaction in the non-oxidative part of the pentose-phosphate pathway; mutants are sensitive to oxidative stress	77.8	72.7	99	175.6
YLR201C COQ9 Mitochondrial inner membrane protein required for ubiquinone (coenzyme Q) biosynthesis, which in turn is required for respiratory growth; exhibits genetic interaction with ABC1, suggesting a possible common function	76.8	73.1	30.4	54.9
YDL072C YET3 Endoplasmic reticulum transmembrane protein, homolog of human BAP31 protein	244.1	231.6	108.6	195.4
YDR376W ARH1 Oxidoreductase of the mitochondrial inner membrane, involved in cytoplasmic and mitochondrial iron homeostasis and required for activity of Fe-S cluster-containing enzymes; one of the few mitochondrial proteins essential for viability	13	23.2	4.7	15.9
YBR222C PCS60 Peroxisomal AMP-binding protein, localizes to both the peroxisomal peripheral membrane and matrix, expression is highly inducible by oleic acid, similar to E. coli long chain acyl-CoA synthetase	59.7	127.6	64.3	260.5
YIR039C YPS6 Putative GPI-anchored aspartic protease	46.5	60.7	10.8	26.7
YBL099W ATP1 Alpha subunit of the F1 sector of mitochondrial F1F0 ATP synthase, which is a large, evolutionarily conserved enzyme complex required for ATP synthesis	826.5	712.9	582.6	949.7
YML125C PGA3 Essential protein required for maturation of Gas1p and Pho8p; GFP-fusion protein localizes to the endoplasmic reticulum; null mutants have a cell separation defect	70.4	165.9	47.7	212.4
YPR081C GRS2 Protein with sequence similarity to Grs1p, which is a glycyl-tRNA synthetase; cannot substitute for Grs1p; possible pseudogene that is expressed at very low levels	19.3	23.6	6.5	15
YML004C GLO1 Monomeric glyoxalase I, catalyzes the detoxification of methylglyoxal (a by-product of glycolysis) via condensation with glutathione to produce S-D-lactoylglutathione; expression regulated by methylglyoxal levels and osmotic stress	319.7	300	145.9	258.1
YMR169C;YMR170C	141.9	213.7	67	189.7
YGL039W	78.1	58.5	14.3	20.1
YGL234W ADE5,7 Bifunctional enzyme of the 'de novo' purine nucleotide biosynthetic pathway, contains aminoimidazole ribotide synthetase and glycinamide ribotide synthetase activities	58.7	62	49.3	97.7
YNL104C LEU4 Alpha-isopropylmalate synthase (2-isopropylmalate synthase); the main isozyme responsible for the first step in the leucine biosynthesis pathway	62.8	61.9	74.6	137.9
YDR389W SAC7 GTPase activating protein (GAP) for Rho1p, involved in signaling to the actin cytoskeleton, null mutations suppress tor2 mutations and temperature sensitive mutations in actin; potential Cdc28p substrate	52.8	37.2	22.5	29.7
YEL067C	28.3	9.6	7.4	4.7
YML052W SUR7 Integral membrane protein localized to cortical patch structures; multicopy suppressor of rvs167 mutation; mutants show defects in sporulation and altered sphingolipid content in plasma membrane	19.8	36.2	16.8	57.5
YKR098C UBP11 Ubiquitin-specific protease that cleaves ubiquitin from ubiquitinated proteins	29.2	35.8	5.8	13.3
YCR012W PGK1 3-phosphoglycerate kinase, catalyzes transfer of high-energy phosphoryl groups from the acyl phosphate of 1,3-bisphosphoglycerate to ADP to produce ATP; key enzyme in glycolysis and gluconeogenesis	403.6	345	495.1	791.1
YGR192C;YJL052W;YJR009C	729.9	636.3	568.6	926.3
YDL138W RGT2 Plasma membrane glucose receptor, highly similar to Snf3p; both Rgt2p and Snf3p serve as transmembrane glucose sensors generating an intracellular signal that induces expression of glucose transporter (HXT) genes	10.6	16.7	1.6	4.7
YOR219C STE13 Dipeptidyl aminopeptidase, Golgi integral membrane protein that cleaves on the carboxyl side of repeating -X-Ala- sequences, required for maturation of alpha factor, transcription is induced by a-factor	37.6	15.9	8	6.3
YGL123W RPS2 Protein component of the small (40S) subunit, essential for control of translational accuracy; has similarity to E. coli S5 and rat S2 ribosomal proteins	179.9	541.5	26.3	147.4
YMR003W	17.3	24.1	8.1	21
YDR513W GRX2 Cytoplasmic glutaredoxin, thioltransferase, glutathione-dependent disulfide oxidoreductase involved in maintaining redox state of target proteins, also exhibits glutathione peroxidase activity, expression induced in response to stress	444.3	428.2	254.6	456.4
YDL047W SIT4 Type 2A-related serine-threonine phosphatase that functions in the G1/S transition of the mitotic cycle; cytoplasmic and nuclear protein that modulates functions mediated by Pkc1p including cell wall and actin cytoskeleton organization	78.3	91.1	43	93
YBR255C-A	692	487.8	427.8	560.5
YDR033W MRH1 Protein that localizes primarily to the plasma membrane, also found at the nuclear envelope; has similarity to Hsp30p and Yro2p, which are induced during heat shock	47.6	189.9	8.3	61.5
YOR393W;YPL281C	29.9	14.2	24.5	21.6
YLR168C	41.5	78	21	73.2
YOL118C	8.8	7.5	12.6	19.9
YKL104C GFA1 Glutamine-fructose-6-phosphate amidotransferase, catalyzes the formation of glucosamine-6-P and glutamate from fructose-6-P and glutamine in the first step of chitin biosynthesis	1917.4	824.5	1024.2	814.6
YJL102W MEF2 Mitochondrial elongation factor involved in translational elongation	96.7	119.2	25.6	58.2
YDL188C PPH22 Catalytic subunit of protein phosphatase 2A, functionally redundant with Pph21p; methylated at C terminus; forms alternate complexes with several regulatory subunits; involved in signal transduction and regulation of mitosis	89.3	84.2	63.1	109.7
YGR204W ADE3 Cytoplasmic trifunctional enzyme C1-tetrahydrofolate synthase, involved in single carbon metabolism and required for biosynthesis of purines, thymidylate, methionine, and histidine	30.8	26.5	33.8	53.6
YBR107C IML3 Protein with a role in kinetochore function, localizes to the outer kinetochore in a Ctf19p-dependent manner, interacts with Chl4p and Ctf19p	18.9	26	8.5	21.5
YKR049C FMP46 Mitochondrial protein of unknown function; putative redox protein containing a thioredoxin fold	150.2	147.2	55	99.1
YOR147W MDM32 Mitochondrial inner membrane protein with similarity to Mdm31p, required for normal mitochondrial morphology and inheritance; interacts genetically with MMM1, MDM10, MDM12, and MDM34	67.7	54	17.6	25.8
YDR510W SMT3 Ubiquitin-like protein of the SUMO family, conjugated to lysine residues of target proteins; regulates chromatid cohesion, chromosome segregation, APC-mediated proteolysis, DNA replication and septin ring dynamics	767.1	760.3	894.3	1627.1
YOL155W-A	27	18.8	1.8	2.3
YLR109W AHP1 Thiol-specific peroxiredoxin, reduces hydroperoxides to protect against oxidative damage; function in vivo requires covalent conjugation to Urm1p	178.9	385.4	116.5	460.3
YLR359W ADE13 Adenylosuccinate lyase, catalyzes two steps in the 'de novo' purine nucleotide biosynthetic pathway	196.2	138.6	63.8	82.6
YGR255C COQ6 Putative flavin-dependent monooxygenase, involved in ubiquinone (Coenzyme Q) biosynthesis; located on the matrix side of the mitochondrial inner membrane	33.1	37.5	19.7	40.9
YDL085C-A	146.6	122.8	70.7	108.5
YNL321W	72.6	75.1	96.9	183.5
YNL249C MPA43 Mitochondrial protein of unknown function	21	52.3	0.9	4.1
YNR030W ALG12 Alpha-1,6-mannosyltransferase localized to the ER; responsible for the addition of the alpha-1,6 mannose to dolichol-linked Man7GlcNAc2, acts in the dolichol pathway for N-glycosylation	26	40.8	16.9	48.5
YFL021W GAT1 Transcriptional activator of genes involved in nitrogen catabolite repression, member of the GATA family of DNA binding proteins; activity and localization regulated by nitrogen limitation and Ure2p	46.3	58.6	62.7	145.1
YLR010C TEN1 Protein that regulates telomeric length; protects telomeric ends in a complex with Cdc13p and Stn1p	51.3	46.7	12.6	20.9
YKR080W MTD1 NAD-dependent 5,10-methylenetetrahydrafolate dehydrogenase, plays a catalytic role in oxidation of cytoplasmic one-carbon units; expression is regulated by Bas1p and Bas2p, repressed by adenine, and may be induced by inositol and choline	252	236.4	103.6	177
YDR150W NUM1 Protein required for nuclear migration, localizes to the mother cell cortex and the bud tip; may mediate interactions of dynein and cytoplasmic microtubules with the cell cortex	84.6	51.9	39.7	44.3
YDR156W RPA14 RNA polymerase I subunit A14	24.3	27.7	28.6	59.3
YCL048W-A	40.1	102.7	23.7	110.2
YOR371C GPB1 Proposed beta subunit of the heterotrimeric G protein that interacts with the receptor Grp1p, has signaling role in response to nutrients; involved in regulation of pseudohyphal growth through cAMP levels; homolog of Gpb2p	24.3	21.6	14.5	23.4
YPR116W	27	19.5	44.4	58.2
YBL059C-A	135.3	118.9	78.3	124.8
YDR070C FMP16 The authentic, non-tagged protein was localized to the mitochondria	347.6	416.8	265	575.8
YMR318C ADH6 NADPH-dependent cinnamyl alcohol dehydrogenase family member with broad substrate specificity; may be involved in fusel alcohol synthesis or in aldehyde tolerance	9.5	15.2	3.8	11
YDR502C SAM2 S-adenosylmethionine synthetase, catalyzes transfer of the adenosyl group of ATP to the sulfur atom of methionine; one of two differentially regulated isozymes (Sam1p and Sam2p)	108.7	179.4	194	578.2
YCL016C DCC1 Subunit of a complex with Ctf8p and Ctf18p that shares some components with Replication Factor C, required for sister chromatid cohesion	35.4	51.4	9.7	25.4
YIL016W SNL1 Protein of unknown function proposed to be involved in nuclear pore complex biogenesis and maintenance as well as protein folding; has similarity to the mammalian BAG-1 protein	20.6	30	5.6	14.7
YFL037W TUB2 Beta-tubulin; associates with alpha-tubulin (Tub1p and Tub3p) to form tubulin dimer, which polymerizes to form microtubules	664.5	531.5	766.9	1105.1
YDR001C NTH1 Neutral trehalase, degrades trehalose; required for thermotolerance and may mediate resistance to other cellular stresses; may be phosphorylated by Cdc28p	314.8	363.1	73.1	151.8
YDR248C	24.7	36.6	6.3	16.8
YHR098C SFB3 Member of the Sec24p family; forms a complex, with Sec23p, that is involved in sorting of Pma1p into COPII vesicles; peripheral ER membrane protein; potential Cdc28p substrate	29.8	35.8	18.1	39.1
YCR061W	80.1	83.6	388.7	728.4
YBL030C PET9 Major ADP/ATP carrier of the mitochondrial inner membrane, exchanges cytosolic ADP for mitochondrially synthesized ATP; required for viability in many common lab strains carrying a mutation in the polymorphic SAL1 gene	848.6	532.8	1770.6	1995.5
YLR271W	202.2	118.3	42	44.1
YML074C FPR3 Nucleolar peptidyl-prolyl cis-trans isomerase (PPIase); FK506 binding protein; phosphorylated by casein kinase II (Cka1p-Cka2p-Ckb1p-Ckb2p) and dephosphorylated by Ptp1p	89	81.5	56.2	92.3
YHR082C KSP1 Nonessential putative serine/threonine protein kinase of unknown cellular role; overproduction causes allele-specific suppression of the prp20-10 mutation	176.6	122.2	60.6	75.1
YDR410C STE14 Farnesyl cysteine-carboxyl methyltransferase, mediates the carboxyl methylation step during C-terminal CAAX motif processing of a-factor and RAS proteins in the endoplasmic reticulum, localizes to the ER membrane	20.6	46.1	5.4	21.6
YDR533C HSP31 Possible chaperone and cysteine protease with similarity to E. coli Hsp31 and S. cerevisiae Hsp32p, Hsp33p, and Sno4p; member of the DJ-1/ThiJ/PfpI superfamily, which includes human DJ-1 involved in Parkinson's disease; exists as a dimer	111.5	123.6	25.5	50.5
YBL084C CDC27 Subunit of the Anaphase-Promoting Complex/Cyclosome (APC/C), which is a ubiquitin-protein ligase required for degradation of anaphase inhibitors, including mitotic cyclins, during the metaphase/anaphase transition	519.4	116.3	168.4	67.3
YPR075C OPY2 Protein of unknown function, overproduction blocks cell cycle arrest in the presence of mating pheromone	165.3	155.8	94.2	158.2
YER032W FIR1 Protein involved in 3' mRNA processing, interacts with Ref2p; potential Cdc28p substrate	8.7	7.4	6.6	10
YGL180W ATG1 Protein serine/threonine kinase, required for autophagy and for the cytoplasm-to-vacuole targeting (Cvt) pathway	171.1	123	140	179.2
YDR525W-A SNA2 Protein of unknown function, has similarity to Pmp3p, which is involved in cation transport; green fluorescent protein (GFP)-fusion protein localizes to the cytoplasm in a punctate pattern	834.7	614.5	1762.7	2308.8
YAL049C	183.3	214.5	93.5	194.2
YPL218W SAR1 GTPase, GTP-binding protein of the ARF family, component of COPII coat of vesicles; required for transport vesicle formation during ER to Golgi protein transport	330.3	382.1	126.9	260.5
YIL172C;YOL157C	40.5	43.8	3.6	6.9
YNL090W RHO2 Non-essential small GTPase of the Rho/Rac subfamily of Ras-like proteins, involved in the establishment of cell polarity and in microtubule assembly	100.3	121.5	64.5	138.4
YJL101C GSH1 Gamma glutamylcysteine synthetase, catalyzes the first step in the gamma-glutamyl cycle for glutathione (GSH) biosynthesis; expression induced by oxidants, cadmium, and mercury	19.2	32.5	16.7	50
YML081W	31.4	23.4	8.2	10.8
YBL005W PDR3 Transcriptional activator of the pleiotropic drug resistance network, regulates expression of ATP-binding cassette (ABC) transporters through binding to cis-acting sites known as PDREs (PDR responsive elements)	14.4	16.3	8.5	17
YBR096W	81.8	133.7	50	144.2
YIL070C MAM33 Acidic protein of the mitochondrial matrix involved in oxidative phosphorylation; related to the human complement receptor gC1q-R	25.8	17.2	52.9	62.2
YOR128C ADE2 Phosphoribosylaminoimidazole carboxylase, catalyzes a step in the 'de novo' purine nucleotide biosynthetic pathway; red pigment accumulates in mutant cells deprived of adenine	143.4	167.6	107.3	220.8
YBR299W;YGR292W	33.7	29.7	9.1	14.1
YPR074C TKL1 Transketolase, similar to Tkl2p; catalyzes conversion of xylulose-5-phosphate and ribose-5-phosphate to sedoheptulose-7-phosphate and glyceraldehyde-3-phosphate in the pentose phosphate pathway; needed for synthesis of aromatic amino acids	21.5	35.3	10.1	29.1
YOL012C HTZ1 Histone variant H2AZ, exchanged for histone H2A in nucleosomes by the SWR1 complex; involved in transcriptional regulation through prevention of the spread of silent heterochromatin	435.1	317.5	327.4	419
YKL219W COS9 Protein of unknown function, member of a family of conserved, often subtelomerically-encoded proteins	117.1	139.6	79.7	166.5
YML101C-A	4.3	17.8	0.8	5.8
YAR035W YAT1 Outer mitochondrial carnitine acetyltransferase, minor ethanol-inducible enzyme involved in transport of activated acyl groups from the cytoplasm into the mitochondrial matrix	270.8	86.3	657.1	366.7
YDR063W	103.1	95.2	38.3	61.9
YOR208W PTP2 Phosphotyrosine-specific protein phosphatase involved in the inactivation of mitogen-activated protein kinase (MAPK) during osmolarity sensing; dephosporylates Hog1p MAPK and regulates its localization; localized to the nucleus	77.5	55.7	25.3	31.8
YOR010C TIR2 Putative cell wall mannoprotein of the Srp1p/Tip1p family of serine-alanine-rich proteins; transcription is induced by cold shock and anaerobiosis	83.5	63.7	0.3	0.4
YPL067C	12.1	15.7	4.5	10.2
YGL029W CGR1 Protein involved in nucleolar integrity and processing of the pre-rRNA for the 60S ribosome subunit; transcript is induced in response to cytotoxic stress but not genotoxic stress	34.8	91.6	13.4	61.6
YMR189W GCV2 P subunit of the mitochondrial glycine decarboxylase complex, required for the catabolism of glycine to 5,10-methylene-THF; expression is regulated by levels of levels of 5,10-methylene-THF in the cytoplasm	208	278.5	142.6	332.9
YEL033W	296	500.1	1.8	5.3
YBR070C ALG14 Component of UDP-GlcNAc transferase required for the second step of dolichyl-linked oligosaccharide synthesis; anchors the catalytic subunit Alg13p to the ER membrane; similar to bacterial and human glycosyltransferases	141.7	146.7	40.1	72.3
YDL033C SLM3 tRNA-specific 2-thiouridylase, responsible for 2-thiolation of the wobble base of mitochondrial tRNAs; human ortholog is implicated in myoclonus epilepsy associated with ragged red fibers (MERRF)	16.8	20.4	4.4	9.3
YJL181W	6.6	10.5	3	8.3
YLR449W FPR4 Nuclear protein, putative peptidyl-prolyl cis-trans isomerase (PPIase) with similarity to Fpr3p; overproduction suppresses the growth defect resulting from the absence of E3 ubiquitin-protein ligase Tom1p	37.8	60.3	13.9	38.5
YOL086C ADH1 Alcohol dehydrogenase, fermentative isozyme active as homo- or heterotetramers; required for the reduction of acetaldehyde to ethanol, the last step in the glycolytic pathway	589.5	315.6	207.8	192.9
YKL175W ZRT3 Vacuolar membrane zinc transporter, transports zinc from storage in the vacuole to the cytoplasm when needed; transcription is induced under conditions of zinc deficiency	75.1	79.8	51.4	94.7
YOL092W	31	59.4	11.8	39.2
YDL086C-A	2.1	1	1.7	1.4
YBL082C ALG3 Dolichol-P-Man dependent alpha(1-3) mannosyltransferase, involved in the synthesis of dolichol-linked oligosaccharide donor for N-linked glycosylation of proteins	25.4	48.8	16.9	56.1
YEL034W HYP2 Translation initiation factor eIF-5A, promotes formation of the first peptide bond; similar to and functionally redundant with Anb1p; undergoes an essential hypusination modification; expressed under aerobic conditions	3026.1	2275.4	4512.8	5856.2
YBL067C UBP13 Putative ubiquitin-specific protease	26.4	49.1	9.1	29.2
YOL084W PHM7 Protein of unknown function, expression is regulated by phosphate levels; green fluorescent protein (GFP)-fusion protein localizes to the cell periphery and vacuole	179.3	88.7	107	91.3
YGL062W PYC1 Pyruvate carboxylase isoform, cytoplasmic enzyme that converts pyruvate to oxaloacetate; highly similar to isoform Pyc2p but differentially regulated; mutations in the human homolog are associated with lactic acidosis	503.9	358.8	350.5	430.4
YGL002W ERP6 Protein with similarity to Emp24p and Erv25p, member of the p24 family involved in ER to Golgi transport	153.4	140.1	48	75.6
YJR143C PMT4 Protein O-mannosyltransferase, transfers mannose residues from dolichyl phosphate-D-mannose to protein serine/threonine residues; appears to form homodimers in vivo and does not complex with other Pmt proteins; target for new antifungals	39.6	53.9	28.4	66.5
YGL245W GUS1 Glutamyl-tRNA synthetase (GluRS), forms a complex with methionyl-tRNA synthetase (Mes1p) and Arc1p; complex formation increases the catalytic efficiency of both tRNA synthetases and ensures their correct localization to the cytoplasm	97.1	97.7	127.3	220.2
YBR132C AGP2 High affinity polyamine permease, preferentially uses spermidine over putrescine; expression is down-regulated by osmotic stress; plasma membrane carnitine transporter, also functions as a low-affinity amino acid permease	97.3	48.4	70.9	60.6
YHR074W QNS1 Glutamine-dependent NAD(+) synthetase, essential for the formation of NAD(+) from nicotinic acid adenine dinucleotide	41.6	54.4	17.1	38.4
YMR010W	97.4	95.3	13.9	23.3
YBR286W APE3 Vacuolar aminopeptidase Y, processed to mature form by Prb1p	396.4	394.9	389.3	664
YPR127W	123.4	135.1	74.4	139.4
YOR390W;YPL279C	23.1	21.4	31.6	50.1
YER136W GDI1 GDP dissociation inhibitor, regulates vesicle traffic in secretory pathways by regulating the dissociation of GDP from the Sec4/Ypt/rab family of GTP binding proteins	176.5	217.7	144.9	305.7
YGR192C TDH3 Glyceraldehyde-3-phosphate dehydrogenase, isozyme 3, involved in glycolysis and gluconeogenesis; tetramer that catalyzes the reaction of glyceraldehyde-3-phosphate to 1,3 bis-phosphoglycerate; detected in the cytoplasm and cell-wall	778.3	657.3	763.5	1102.6
YMR235C RNA1 GTPase activating protein (GAP) for Gsp1p, involved in nuclear transport	165.1	188.5	65.7	128.2
YHR042W NCP1 NADP-cytochrome P450 reductase; involved in ergosterol biosynthesis; associated and coordinately regulated with Erg11p	122.6	120.8	151.6	255.2
YJL185C	21.9	22.7	26.6	47.1
YCL039W GID7 Protein of unknown function, involved in proteasome-dependent catabolite inactivation of fructose-1,6-bisphosphatase; contains six WD40 repeats; computational analysis suggests that Gid7p and Moh1p have similar functions	55.2	44.3	50.7	69.5
YPR115W	51.7	40.4	23.9	31.9
YKL163W PIR3 O-glycosylated covalently-bound cell wall protein required for cell wall stability; expression is cell cycle regulated, peaking in M/G1 and also subject to regulation by the cell integrity pathway	228.7	257.4	146.5	281.1
YBR012C	70.8	88.1	9.3	19.7
YKR103W NFT1 Putative transporter of the multidrug resistance-associated protein (MRP) subfamily; adjacent ORFs YKR103W and YKR104W are merged in different strain backgrounds.	12	9.4	0.3	0.4
YML065W ORC1 Largest subunit of the origin recognition complex, which directs DNA replication by binding to replication origins and is also involved in transcriptional silencing; may be phosphorylated by Cdc28p	165.5	145.6	39.2	58.7
YLL004W ORC3 Subunit of the origin recognition complex, which directs DNA replication by binding to replication origins and is also involved in transcriptional silencing	124.9	107.7	13.9	20.4
YBR201W DER1 Endoplasmic reticulum membrane protein, required for ER-associated protein degradation, involved in the retrograde transport of misfolded or unassembled proteins; N- and C- termini protrude into the cytoplasm, has similarity to Dfm1p	72.2	73.5	19.4	33.6
YOR271C	39.3	59.1	52.2	133.5
YBL080C PET112 Protein required for mitochondrial translation; mutation is functionally complemented by a Bacillus subtilis ortholog	22.9	27.3	7.3	14.8
YGR151C;YGR152C	42.7	78.6	3.1	9.7
YIL100W	14.8	11.4	1.3	1.7
YPL094C SEC62 Essential subunit of Sec63 complex (Sec63p, Sec62p, Sec66p and Sec72p); with Sec61 complex, Kar2p/BiP and Lhs1p forms a channel competent for SRP-dependent and post-translational SRP-independent protein targeting and import into the ER	102.4	163.3	29.7	80.4
YER144C UBP5 Putative ubiquitin-specific protease that does not associate with the proteasome	72.9	43.1	32.1	32.2
YHR198C FMP22 The authentic, non-tagged protein was localized to the mitochondria	69.4	75.4	24.6	45.3
YER103W SSA4 Heat shock protein that is highly induced upon stress; plays a role in SRP-dependent cotranslational protein-membrane targeting and translocation; member of the HSP70 family; cytoplasmic protein that concentrates in nuclei upon starvation	232	190.4	74.9	104.1
YER070W RNR1 Ribonucleotide-diphosphate reductase (RNR), large subunit; the RNR complex catalyzes the rate-limiting step in dNTP synthesis and is regulated by DNA replication and DNA damage checkpoint pathways via localization of the small subunits	58.5	85.1	101.7	250.5
YDR492W IZH1 Membrane protein involved in zinc metabolism, member of the four-protein IZH family; transcription is regulated directly by Zap1p, expression induced by zinc deficiency and fatty acids; deletion increases sensitivity to elevated zinc	105.4	127.8	64.2	131.7
YOR140W SFL1 Transcription repressor involved in regulation of flocculation-related genes, inhibits transcription by recruiting general corepressor Cyc8p-Tup1p to different promoters; negatively regulated by cAMP-dependent protein kinase A subunit Tpk2p	10.5	11.8	4	7.6
YBR196C PGI1 Glycolytic enzyme phosphoglucose isomerase, catalyzes the interconversion of glucose-6-phosphate and fructose-6-phosphate; required for cell cycle progression and completion of the gluconeogenic events of sporulation	91.7	63.3	36.6	42.7
YOR099W KTR1 Alpha-1,2-mannosyltransferase involved in O- and N-linked protein glycosylation; member of the KRE2/MNT1 mannosyltransferase family	286.6	185.8	204.2	223.7
YLL066C	392.6	389.5	6.8	11.4
YEL009C-A	33.2	52.9	4.2	11.3
YDL237W	50.6	70.2	28.9	67.7
YGR148C RPL24B Ribosomal protein L30 of the large (60S) ribosomal subunit, nearly identical to Rpl24Ap and has similarity to rat L24 ribosomal protein; not essential for translation but may be required for normal translation rate	168.5	421	78	329
YOR018W ROD1 Membrane protein; overexpression confers resistance to the GST substrate o-dinitrobenzene as well as to zinc and calcium; contains 2 PY motifs, which are required for Rod1p interaction with Rsp5p, a hect-type ubiquitin ligase	16.4	14.5	12.2	18.2
YHL015W RPS20 Protein component of the small (40S) ribosomal subunit; overproduction suppresses mutations affecting RNA polymerase III-dependent transcription; has similarity to E. coli S10 and rat S20 ribosomal proteins	448.5	865.9	104.9	341.6
YBR036C CSG2 Endoplasmic reticulum membrane protein, required for mannosylation of inositolphosphorylceramide and for growth at high calcium concentrations	155.9	125.9	130.9	178.3
YCR031C RPS14A Ribosomal protein 59 of the small subunit, required for ribosome assembly and 20S pre-rRNA processing; mutations confer cryptopleurine resistance; nearly identical to Rps14Bp and similar to E. coli S11 and rat S14 ribosomal proteins	314.6	542.8	117.5	341.3
YGR295C COS6 Protein of unknown function, member of a family of conserved, often subtelomerically-encoded proteins	268.3	266.7	101.2	169.3
YLR091W	5.1	8.3	1.9	5.2
YLR001C	65.9	46.9	37.6	45
YKL134C 38991 Mitochondrial intermediate peptidase, cleaves N-terminal residues of a subset of proteins upon import, after their cleavage by mitochondrial processing peptidase (Mas1p-Mas2p); may contribute to mitochondrial iron homeostasis	41.6	47.9	37.1	71.8
YDR344C	5.1	8.5	0.5	1.4
YPL231W FAS2 Alpha subunit of fatty acid synthetase, which catalyzes the synthesis of long-chain saturated fatty acids; contains beta-ketoacyl reductase and beta-ketoacyl synthase activities	133.5	178.8	250.8	564.3
YLR382C NAM2 Mitochondrial leucyl-tRNA synthetase, also has a direct role in splicing of several mitochondrial group I introns; indirectly required for mitochondrial genome maintenance	18.7	14.8	8.8	11.7
YDL134C;YDL188C	247.3	290.2	140.2	275.9
YJR109C CPA2 Large subunit of carbamoyl phosphate synthetase, which catalyzes a step in the synthesis of citrulline, an arginine precursor	88.9	62.4	64	75.3
YDL073W	32.8	36.4	5	9.3
YKL067W YNK1 Nucleoside diphosphate kinase, catalyzes the transfer of gamma phosphates from nucleoside triphosphates, usually ATP, to nucleoside diphosphates by a mechanism that involves formation of an autophosphorylated enzyme intermediate	692.2	924.4	590	1319.8
YAL065C	64.1	78.7	11.2	23
YIL088C AVT7 Putative transporter, member of a family of seven S. cerevisiae genes (AVT1-7) related to vesicular GABA-glycine transporters	52.7	94.8	14	42.1
YOL104C NDJ1 Meiosis-specific telomere protein, required for bouquet formation, effective homolog pairing, ordered cross-over distribution (interference), sister chromatid cohesion at meiotic telomeres, and segregation of small chromosomes	339.4	410	267.3	539.2
YKR088C TVP38 Integral membrane protein localized to late Golgi vesicles along with the v-SNARE Tlg2p; green fluorescent protein (GFP)-fusion protein localizes to the cytoplasm in a punctate pattern	108.1	115.1	37.3	66.3
YGR157W CHO2 Phosphatidylethanolamine methyltransferase (PEMT), catalyzes the first step in the conversion of phosphatidylethanolamine to phosphatidylcholine during the methylation pathway of phosphatidylcholine biosynthesis	93.4	158.6	38.5	109.1
YJR016C ILV3 Dihydroxyacid dehydratase, catalyzes third step in the common pathway leading to biosynthesis of branched-chain amino acids	46	64.8	28.8	67.7
YLR097C HRT3 Putative nuclear ubiquitin ligase, based on computational analysis of large-scale protein-protein interaction data; has similarity to F-box proteins; identified in association with Cdc53p, Skp1p and Ubi4 in large-scale studies	78.6	102.7	6.1	13.3
YDR373W FRQ1 N-myristoylated calcium-binding protein that may have a role in intracellular signaling through its regulation of the phosphatidylinositol 4-kinase Pik1p; member of the recoverin/frequenin branch of the EF-hand superfamily	130.4	164.7	46.6	98.2
YEL060C PRB1 Vacuolar proteinase B (yscB), a serine protease of the subtilisin family; involved in protein degradation in the vacuole and required for full protein degradation during sporulation	2098.8	1200.4	7448.4	7107.6
YLR204W QRI5 Mitochondrial protein of unknown function	143.7	59.9	92.5	64.2
YLR346C	296.5	264.8	102.5	152.4
YDR379W RGA2 GTPase-activating protein for the polarity-establishment protein Cdc42p; implicated in control of septin organization, pheromone response, and haploid invasive growth	31.3	27.3	7.3	10.6
YKR003W OSH6 Member of an oxysterol-binding protein family with overlapping, redundant functions in sterol metabolism and which collectively perform a function essential for viability; GFP-fusion protein localizes to the cell periphery	46	31.2	29.5	33.3
YML022W APT1 Adenine phosphoribosyltransferase, catalyzes the formation of AMP from adenine and 5-phosphoribosylpyrophosphate; involved in the salvage pathway of purine nucleotide biosynthesis	64.6	116.2	23.2	69.4
YNL307C MCK1 Protein serine/threonine/tyrosine (dual-specificity) kinase involved in control of chromosome segregation and in regulating entry into meiosis; related to mammalian glycogen synthase kinases of the GSK-3 family	162.9	174	112.2	199.2
YPL247C	29.7	33	26.5	48.9
YBR149W ARA1 Large subunit of NADP+ dependent arabinose dehydrogenase, involved in carbohydrate metabolism; small subunit is unidentified	308.7	325	201	351.4
YJR077C MIR1 Mitochondrial phosphate carrier, imports inorganic phosphate into mitochondria; functionally redundant with Pic2p but more abundant than Pic2 under normal conditions	297.7	243.9	389.9	530.2
YMR036C MIH1 Protein tyrosine phosphatase involved in cell cycle control; regulates the phosphorylation state of Cdc28p; homolog of S. pombe cdc25	94.9	105.5	64.5	118.9
YHR073W;YHR073W-A	30.8	34.5	2.8	5.2
YDR312W SSF2 Protein required for ribosomal large subunit maturation, functionally redundant with Ssf1p; member of the Brix family	37.8	53.2	18	42
YHR131C	45.3	45.7	16.7	27.9
YBR015C MNN2 Alpha-1,2-mannosyltransferase, responsible for addition of the first alpha-1,2-linked mannose to form the branches on the mannan backbone of oligosaccharides, localizes to an early Golgi compartment	44.3	50.3	39.1	73.5
YJR046W TAH11 DNA replication licensing factor, required for pre-replication complex assembly	13.1	21.3	6.8	18.3
YPR079W MRL1 Membrane protein with similarity to mammalian mannose-6-phosphate receptors, possibly functions as a sorting receptor in the delivery of vacuolar hydrolases	79.6	65.3	16.5	22.4
YER067W	636.6	580.3	145.3	219.1
YJR005W APL1 Beta-adaptin, large subunit of the clathrin associated protein complex (AP-2); involved in vesicle mediated transport; similar to mammalian beta-chain of the clathrin associated protein complex	45.3	42.9	17.5	27.4
YLR436C ECM30 Non-essential protein of unknown function	20.8	19.3	9.2	14.1
YFL028C CAF16 Part of the evolutionarily-conserved CCR4-NOT transcriptional regulatory complex involved in controlling mRNA initiation, elongation, and degradation; putative ABC ATPase; interacts with Ssn2p, Ssn3p, and Ssn8p	52.2	63.3	12.8	25.6
YLR079W SIC1 Inhibitor of Cdc28-Clb kinase complexes that controls G1/S phase transition, preventing premature S phase and ensuring genomic integrity; phosphorylation targets Sic1p for SCF(CDC4)-dependent turnover; functional homolog of mammalian Kip1	27.3	28.8	23.8	41.4
YAL056W GPB2 Proposed beta subunit of the heterotrimeric G protein that interacts with the receptor Grp1p, has signaling role in response to nutrients; involved in regulation of pseudohyphal growth through cAMP levels; homolog of Gpb1p	47.5	54.8	10	19
YDR038C ENA5 Protein with similarity to P-type ATPase sodium pumps	770.1	281.5	583.1	351
YKR042W UTH1 Mitochondrial outer membrane and cell wall localized SUN family member required for mitochondrial autophagy; involved in the oxidative stress response, life span during starvation, mitochondrial biogenesis, and cell death	1134.9	1139.7	165.7	274
YBR283C SSH1 Subunit of the Ssh1 translocon complex; Sec61p homolog involved in co-translational pathway of protein translocation; not essential	286.3	298.7	4.6	7.9
YBR117C TKL2 Transketolase, similar to Tkl1p; catalyzes conversion of xylulose-5-phosphate and ribose-5-phosphate to sedoheptulose-7-phosphate and glyceraldehyde-3-phosphate in the pentose phosphate pathway; needed for synthesis of aromatic amino acids	28.3	60.8	18.8	66.4
YOR085W OST3 Gamma subunit of the oligosaccharyltransferase complex of the ER lumen, which catalyzes asparagine-linked glycosylation of newly synthesized proteins; Ost3p is important for N-glycosylation of a subset of proteins	99.8	109.9	81.9	148.2
YGR180C RNR4 Ribonucleotide-diphosphate reductase (RNR), small subunit; the RNR complex catalyzes the rate-limiting step in dNTP synthesis and is regulated by DNA replication and DNA damage checkpoint pathways via localization of the small subunits	294.8	352.6	176.4	346.5
YDR164C SEC1 Sm-like protein involved in docking and fusion of exocytic vesicles through binding to assembled SNARE complexes at the membrane; localization to sites of secretion (bud neck and bud tip) is dependent on SNARE function	20.6	31.2	6.6	16.4
YLR258W GSY2 Glycogen synthase, similar to Gsy1p; expression induced by glucose limitation, nitrogen starvation, heat shock, and stationary phase; activity regulated by cAMP-dependent, Snf1p and Pho85p kinases as well as by the Gac1p-Glc7p phosphatase	123.1	136.8	61.6	112.2
YDR461W MFA1 Mating pheromone a-factor, made by a cells; interacts with alpha cells to induce cell cycle arrest and other responses leading to mating; biogenesis involves C-terminal modification, N-terminal proteolysis, and export; also encoded by MFA2	152.2	148.9	24.4	39.1
YJL116C NCA3 Protein that functions with Nca2p to regulate mitochondrial expression of subunits 6 (Atp6p) and 8 (Atp8p ) of the Fo-F1 ATP synthase; member of the SUN family	33.7	72.6	5.3	18.7
YBR263W SHM1 Mitochondrial serine hydroxymethyltransferase, involved in one-carbon metabolism	64	109.6	77.2	216.5
YLR006C SSK1 Cytoplasmic response regulator, part of a two-component signal transducer that mediates osmosensing via a phosphorelay mechanism; dephosphorylated form is degraded by the ubiquitin-proteasome system; potential Cdc28p substrate	40.5	29.6	21.5	25.7
YOL076W MDM20 Non-catalytic subunit of the NatB N-terminal acetyltransferase, which catalyzes acetylation of the amino-terminal methionine residues of all proteins beginning with Met-Asp or Met-Glu and of some proteins beginning with Met-Asn or Met-Met; involved in mitochondrial inheritance and actin assembly	24.8	43.5	13.4	38.4
YHR188C GPI16 Transmembrane protein subunit of the glycosylphosphatidylinositol transamidase complex that adds GPIs to newly synthesized proteins; human PIG-Tp homolog	67.6	66	76.2	121.5
YGR019W UGA1 Gamma-aminobutyrate (GABA) transaminase (4-aminobutyrate aminotransferase) involved in the 4-aminobutyrate and glutamate degradation pathways; required for normal oxidative stress tolerance and nitrogen utilization	95.8	125.2	115.7	246.4
YPL050C MNN9 Subunit of Golgi mannosyltransferase complex also containing Anp1p, Mnn10p, Mnn11p, and Hoc1p that mediates elongation of the polysaccharide mannan backbone; forms a separate complex with Van1p that is also involved in backbone elongation	118.7	177.9	50.1	122.3
YOL016C CMK2 Calmodulin-dependent protein kinase; may play a role in stress response, many CA++/calmodulan dependent phosphorylation substrates demonstrated in vitro, amino acid sequence similar to Cmk1p and mammalian Cam Kinase II	809.4	85.6	352.4	60.6
YHR175W CTR2 Putative low-affinity copper transporter of the vacuolar membrane; mutation confers resistance to toxic copper concentrations, while overexpression confers resistance to copper starvation	54.5	66.7	29.4	58.5
YAL054C ACS1 Acetyl-coA synthetase isoform, expressed during growth on nonfermentable carbon sources and under aerobic conditions	2626.7	1760.1	9167.7	9985.9
YFL061W;YNL335W	65	54.6	5.2	7.1
YBR103W SIF2 WD40 repeat-containing subunit of the Set3C histone deacetylase complex, which represses early/middle sporulation genes; antagonizes telomeric silencing; binds specifically to the Sir4p N-terminus	49.7	77.6	15.5	39.3
YOR340C RPA43 RNA polymerase I subunit A43	34.8	43.1	11.8	23.7
YMR173W DDR48 DNA damage-responsive protein, expression is increased in response to heat-shock stress or treatments that produce DNA lesions; contains multiple repeats of the amino acid sequence NNNDSYGS	36.7	26	38.3	44
YML117W NAB6 Putative RNA-binding protein, based on computational analysis of large-scale protein-protein interaction data	147.8	109.7	45.3	54.5
YBR210W ERV15 Protein of unknown function, has similarity to Erv14p	25.2	33.6	11.9	25.7
YML016C PPZ1 Serine/threonine protein phosphatase Z, isoform of Ppz2p; involved in regulation of potassium transport, which affects osmotic stability, cell cycle progression, and halotolerance	52.5	66	5.7	11.6
YPL048W CAM1 Translational cofactor elongation factor-1 gamma, participates in the regulation of GTP-binding protein EF-1 alpha, may play a redundant role in the regulation of protein synthesis or another GTP-dependent process	389.7	319.6	633.7	841.1
YER010C	200.3	317.2	142	363.7
YKL194C MST1 Mitochondrial threonyl-tRNA synthetase	13.9	21	5.2	12.7
YDL144C	33.1	44.4	24.6	53.3
YGL014W PUF4 Member of the PUF protein family, which is defined by the presence of Pumilio homology domains that confer RNA binding activity; preferentially binds mRNAs encoding nucleolar ribosomal RNA-processing factors	62.6	52.5	26.4	35.7
YAL021C CCR4 Component of the CCR4-NOT transcriptional complex, which is involved in regulation of gene expression; component of the major cytoplasmic deadenylase, which is involved in mRNA poly(A) tail shortening	34.6	31.7	49.1	72.5
YBL049W MOH1 Protein of unknown function, has homology to kinase Snf7p; not required for growth on nonfermentable carbon sources; essential for viability in stationary phase	299.3	397.5	180.5	386.3
YOL152W FRE7 Putative ferric reductase with similarity to Fre2p; expression induced by low copper levels	2.4	17.3	1.3	15.1
YLR448W RPL6B Protein component of the large (60S) ribosomal subunit, has similarity to Rpl6Bp and to rat L6 ribosomal protein; binds to 5.8S rRNA	91.6	238.8	47.3	198.7
YOR084W	87.6	75	48.5	66.9
YOL013C HRD1 Ubiquitin-protein ligase required for endoplasmic reticulum-associated degradation (ERAD) of misfolded proteins; genetically linked to the unfolded protein response (UPR); regulated through association with Hrd3p; contains an H2 ring finger	111.2	142.1	35.9	73.9
YOL010W RCL1 RNA terminal phosphate cyclase-like protein involved in rRNA processing at sites A0, A1, and A2; does not possess detectable RNA cyclase activity	26	34.9	3.7	8
YEL034C-A	6.7	5.2	0.4	0.5
YER086W ILV1 Threonine deaminase, catalyzes the first step in isoleucine biosynthesis; expression is under general amino acid control; ILV1 locus exhibits highly positioned nucleosomes whose organization is independent of known ILV1 regulation	58.1	99.9	38.9	107.7
YOR351C MEK1 Meiosis-specific serine/threonine protein kinase, functions in meiotic checkpoint, phosphorylates Red1p, interacts with Hop1p; required for meiotic recombination and normal spore viability	463.8	575.9	578.6	1156.2
YGL027C CWH41 Processing alpha glucosidase I, ER type II integral membrane N-glycoprotein involved in assembly of cell wall beta 1,6 glucan and asparagine-linked protein glycosylation; also involved in ER protein quality control and sensing of ER stress	63.9	66.8	43.6	73.3
YNL092W	88.1	68.1	65.8	81.7
YGL094C PAN2 Essential subunit of the Pan2p-Pan3p poly(A)-ribonuclease complex, which acts to control poly(A) tail length and regulate the stoichiometry and activity of postreplication repair complexes	22.2	31.6	1.4	3.2
YPL006W NCR1 Vacuolar membrane protein that transits through the biosynthetic vacuolar protein sorting pathway, involved in sphingolipid metabolism; glycoprotein and functional orthologue of human Niemann Pick C1 (NPC1) protein	51.1	44.3	42.5	59
YOR172W YRM1 Zn2-Cys6 zinc-finger transcription factor that activates genes involved in multidrug resistance; paralog of Yrr1p, acting on an overlapping set of target genes	27.2	24.5	8.6	12.4
YKR058W GLG1 Self-glucosylating initiator of glycogen synthesis, also glucosylates n-dodecyl-beta-D-maltoside; similar to mammalian glycogenin	68.2	63	6.7	9.9
YBR114W RAD16 Protein that recognizes and binds damaged DNA in an ATP-dependent manner (with Rad7p) during nucleotide excision repair; subunit of Nucleotide Excision Repair Factor 4 (NEF4); member of the SWI/SNF family	66.6	107.4	1.9	4.9
YKL060C FBA1 Fructose 1,6-bisphosphate aldolase, a cytosolic enzyme required for glycolysis and gluconeogenesis; catalyzes the conversion of fructose 1,6 bisphosphate into two 3-carbon products: glyceraldehyde-3-phosphate and dihydroxyacetone phosphate	1092.9	952	725.7	1009.9
YMR200W ROT1 Protein that may be involved in cell wall function; mutations in rot1 cause cell wall defects, suppress tor2 mutations, and are synthetically lethal with rot2 mutations	532.4	374.4	256.1	287.7
YGR146C	94.8	58.1	42.7	41.8
YMR237W BCH1 Protein that colocalizes with clathrin-coated vesicles; involved in transport at the trans-Golgi	48.1	52.7	39.9	69.8
YOR016C ERP4 Protein with similarity to Emp24p and Erv25p, member of the p24 family involved in ER to Golgi transport	137	205	73	174.4
YLR234W TOP3 DNA Topoisomerase III, conserved protein that functions in a complex with Sgs1p and Rmi1p to relax single-stranded negatively-supercoiled DNA preferentially, involved in telomere stability and regulation of mitotic recombination	12.5	20.3	13.5	35
YBR085W AAC3 Mitochondrial inner membrane ADP/ATP translocator, exchanges cytosolic ADP for mitochondrially synthesized ATP; expressed under anaerobic conditions; similar to Pet9p and Aac1p; has roles in maintenance of viability and in respiration	11.2	18.5	5.5	14.5
YJL141C YAK1 Serine-threonine protein kinase that is part of a glucose-sensing system involved in growth control in response to glucose availability; translocates from the cytoplasm to the nucleus and phosphorylates Pop2p in response to a glucose signal	86.1	78.5	52.4	76.2
YAR019C CDC15 Protein kinase of the Mitotic Exit Network that is localized to the spindle pole bodies at late anaphase; promotes mitotic exit by directly switching on the kinase activity of Dbf2p	47.4	40.9	30.1	41.4
YPR181C SEC23 GTPase-activating protein; component of the Sec23p-Sec24p heterodimeric complex of the COPII vesicle coat, involved in ER to Golgi transport and autophagy; stimulates the GDP-bound form of Sar1p	56.6	62.1	72.1	126
YGL090W LIF1 Protein involved in DNA double-strand break repair; physically interacts with DNA ligase 4 (Lig4p); homologous to mammalian XRCC4 protein	18.8	24.9	4.6	9.7
YDL220C CDC13 Single stranded DNA-binding protein found at TG1-3 telomere G-tails; regulates telomere replication through recruitment of specific sub-complexes, but the essential function is telomere capping	11.5	13.4	8.9	16.5
YEL031W SPF1 P-type ATPase, ion transporter of the ER membrane involved in ER function and Ca2+ homeostasis; required for regulating Hmg2p degradation; confers sensitivity to a killer toxin (SMKT) produced by Pichia farinosa KK1	44.3	52	51.7	96.5
YER178W PDA1 E1 alpha subunit of the pyruvate dehydrogenase (PDH) complex, catalyzes the direct oxidative decarboxylation of pyruvate to acetyl-CoA, regulated by glucose	394.1	435.9	482	847.1
YMR056C AAC1 Mitochondrial inner membrane ADP/ATP translocator, exchanges cytosolic ADP for mitochondrially synthesized ATP; Aac1p is a minor isoform while Pet9p is the major ADP/ATP translocator	426.2	523.2	334.9	653.2
YNL009W IDP3 Peroxisomal NADP-dependent isocitrate dehydrogenase, catalyzes oxidation of isocitrate to alpha-ketoglutarate with the formation of NADP(H+), required for growth on unsaturated fatty acids	55.8	39.8	18.8	21.3
YDL137W ARF2 ADP-ribosylation factor, GTPase of the Ras superfamily involved in regulation of coated formation vesicles in intracellular trafficking within the Golgi; functionally interchangeable with Arf1p	847.1	705	367.8	486.2
YNL314W DAL82 Positive regulator of allophanate inducible genes; binds a dodecanucleotide sequence upstream of all genes that are induced by allophanate; contains an UISALL DNA-binding, a transcriptional activation, and a coiled-coil domain	22.8	36.9	10.7	27.5
YJL060W BNA3 Arylformamidase, involved in biosynthesis of nicotinic acid from tryptophan via kynurenine pathway; potential Cdc28p substrate	13.8	16.2	18.9	35.2
YLR354C TAL1 Transaldolase, enzyme in the non-oxidative pentose phosphate pathway; converts sedoheptulose 7-phosphate and glyceraldehyde 3-phosphate to erythrose 4-phosphate and fructose 6-phosphate	71.8	71.6	57.7	91.2
YOR332W VMA4 Subunit E of the eight-subunit V1 peripheral membrane domain of the vacuolar H+-ATPase (V-ATPase), an electrogenic proton pump found throughout the endomembrane system; required for the V1 domain to assemble onto the vacuolar membrane	333.8	339.7	416	670.9
YNL058C	10.9	14.6	9	19.1
YNL320W	75.2	90	63.5	120.4
YOR358W HAP5 Subunit of the heme-activated, glucose-repressed Hap2/3/4/5 CCAAT-binding complex, a transcriptional activator and global regulator of respiratory gene expression; required for assembly and DNA binding activity of the complex	30.2	19.5	31.6	32.3
YNL194C	409.3	345.9	703.6	940.9
YLR203C MSS51 Nuclear encoded protein required for translation of COX1 mRNA; binds to Cox1 protein	34.3	25.3	37.1	43.3
YJR105W ADO1 Adenosine kinase, required for the utilization of S-adenosylmethionine (AdoMet); may be involved in recycling adenosine produced through the methyl cycle	100.6	156.5	64.9	159.7
YGL175C SAE2 Protein with a role in accurate meiotic and mitotic double-strand break repair; phosphorylated in response to DNA damage and required for normal resistance to DNA-damaging agents	39.8	23.1	23.1	21.2
YPL109C	57.2	65.8	37.4	68
YOL030W GAS5 Putative 1,3-beta-glucanosyltransferase, has similarity to Gas1p; localizes to the cell wall	185.4	210	46.4	83
YML058W-A HUG1 Protein involved in the Mec1p-mediated checkpoint pathway that responds to DNA damage or replication arrest, transcription is induced by DNA damage	19.7	16.2	38.9	50.5
YMR139W RIM11 Protein kinase required for signal transduction during entry into meiosis; promotes the formation of the Ime1p-Ume6p complex by phosphorylating Ime1p and Ume6p; shares similarity with mammalian glycogen synthase kinase 3-beta	231.7	227.9	114.2	177.2
YLL024C SSA2 ATP binding protein involved in protein folding and vacuolar import of proteins; member of heat shock protein 70 (HSP70) family; associated with the chaperonin-containing T-complex; present in the cytoplasm, vacuolar membrane and cell wall	97.8	146.4	131.7	310.8
YNL238W KEX2 Subtilisin-like protease (proprotein convertase), a calcium-dependent serine protease involved in the activation of proproteins of the secretory pathway	59.3	40.6	30.5	32.9
YOR107W RGS2 Negative regulator of glucose-induced cAMP signaling; directly activates the GTPase activity of the heterotrimeric G protein alpha subunit Gpa2p	91.7	52.6	8.3	7.5
YDR335W MSN5 Karyopherin involved in nuclear import and export; shown to be responsible for nuclear import of replication protein A and for export of several proteins including Swi6p, Far1p, and Pho4p; cargo dissociation involves binding to RanGTP	84.7	92.3	36.6	62.8
YLR352W	38	35	23.1	33.5
YJL164C TPK1 Subunit of cytoplasmic cAMP-dependent protein kinase, which contains redundant catalytic subunits Tpk1p, Tpk2p, and Tpk3p and regulatory subunit Bcy1p; promotes vegetative growth in response to nutrients; inhibits filamentous growth	102	101.4	25.3	39.6
YMR008C PLB1 Phospholipase B (lysophospholipase) involved in lipid metabolism, required for deacylation of phosphatidylcholine and phosphatidylethanolamine but not phosphatidylinositol	106.6	39.8	116.9	68.7
YCL004W PGS1 Phosphatidylglycerolphosphate synthase, catalyzes the synthesis of phosphatidylglycerolphosphate from CDP-diacylglycerol and sn-glycerol 3-phosphate in the first committed and rate-limiting step of cardiolipin biosynthesis	14.9	14.4	10.8	16.4
YGR061C ADE6 Formylglycinamidine-ribonucleotide (FGAM)-synthetase, catalyzes a step in the 'de novo' purine nucleotide biosynthetic pathway	43.5	60.5	27.6	60.3
YKL154W SRP102 Signal recognition particle (SRP) receptor beta subunit; involved in SRP-dependent protein targeting; anchors Srp101p to the ER membrane	39.8	104.7	15.5	64
YDR347W MRP1 Mitochondrial ribosomal protein of the small subunit; MRP1 exhibits genetic interactions with PET122, encoding a COX3-specific translational activator, and with PET123, encoding a small subunit mitochondrial ribosomal protein	30.7	32.6	24.3	40.5
YMR221C FMP42 The authentic, non-tagged protein was localized to the mitochondria	68.8	83.2	44.9	85.2
YDL042C SIR2 Conserved NAD+ dependent histone deacetylase of the Sirtuin family involved in regulation of lifespan; plays roles in silencing at HML, HMR, telomeres, and the rDNA locus; negatively regulates initiation of DNA replication	9.3	12.2	5.2	10.7
YKL210W UBA1 Ubiquitin activating enzyme, involved in ubiquitin-mediated protein degradation and essential for viability	122.3	111	135.1	192.3
YJL199C MBB1 Dubious open reading frame, unlikely to encode a protein; not conserved in closely related Saccharomyces species; protein detected in large-scale protein-protein interaction studies	85.6	89.6	22.3	36.6
YJL133W MRS3 Mitochondrial iron transporter of the mitochondrial carrier family (MCF), very similar to and functionally redundant with Mrs4p; functions under low-iron conditions; may transport other cations in addition to iron	21.4	32.7	6.9	16.5
YOR228C	30.7	30.5	18.4	28.6
YML091C RPM2 Protein component of mitochondrial RNase P, along with the mitochondrially-encoded RNA subunit RPM1; Rnase P removes 5' extensions from tRNA precursors; Rpm2p is also involved in maturation of RPM1 and in translation of mitochondrial mRNAs	372.2	225.6	42.3	40.1
YNL287W SEC21 Gamma subunit of coatomer, a heptameric protein complex that together with Arf1p forms the COPI coat; involved in ER to Golgi transport of selective cargo	82.8	85.3	69.5	111.9
YBL032W HEK2 RNA binding protein with similarity to hnRNP-K that localizes to the cytoplasm and to subtelomeric DNA; required for the proper localization of ASH1 mRNA; involved in the regulation of telomere position effect and telomere length	108.2	73.3	145.1	153.5
YLR381W CTF3 Outer kinetochore protein that forms a complex with Mcm16p and Mcm22p; may bind the kinetochore to spindle microtubules	13.7	18.3	3.5	7.3
YKL221W MCH2 Protein with similarity to mammalian monocarboxylate permeases, which are involved in transport of monocarboxylic acids across the plasma membrane; mutant is not deficient in monocarboxylate transport	24.6	31.2	8.7	17.2
YFL002C SPB4 Putative ATP-dependent RNA helicase, nucleolar protein required for synthesis of 60S ribosomal subunits at a late step in the pathway; sediments with 66S pre-ribosomes in sucrose gradients	21	33.6	8.8	21.9
YOR197W MCA1 Putative cysteine protease similar to mammalian caspases, involved in regulation of apoptosis upon hydrogen peroxide treatment	53.2	52	39.9	60.6
YDR084C TVP23 Integral membrane protein localized to late Golgi vesicles along with the v-SNARE Tlg2p; green fluorescent protein (GFP)-fusion protein localizes to the cytoplasm in a punctate pattern	47.2	48.7	19.4	31.1
YJR131W MNS1 Alpha-1,2-mannosidase involved in ER quality control; catalyzes the removal of one mannose residue from Man9GlcNAc to produce a single isomer of Man8GlcNAc in N-linked oligosaccharide biosynthesis; integral to ER membrane	26.4	36	22	46.6
YGR240C PFK1 Alpha subunit of heterooctameric phosphofructokinase involved in glycolysis, indispensable for anaerobic growth, activated by fructose-2,6-bisphosphate and AMP, mutation inhibits glucose induction of cell cycle-related genes	149	141.7	111.9	165.1
YIL177C;YNL339C	426.5	347.7	3.4	4.3
YCL040W GLK1 Glucokinase, catalyzes the phosphorylation of glucose at C6 in the first irreversible step of glucose metabolism; one of three glucose phosphorylating enzymes; expression regulated by non-fermentable carbon sources	244.6	97.7	258.4	160.1
YLR047C FRE8 Protein with sequence similarity to iron/copper reductases, involved in iron homeostasis; deletion mutant has iron deficiency/accumulation growth defects; expression increased in the absence of copper-responsive transcription factor Mac1p	10.2	12.1	2.5	4.6
YNL138W SRV2 CAP (cyclase-associated protein) subunit of adenylyl cyclase complex; N-terminus binds adenylyl cyclase and facilitates activation by RAS; C-terminus binds ADP-actin monomers, facilitating regulation of actin dynamics and cell morphogenesis	78.1	75.2	113.1	168.7
YKL127W PGM1 Phosphoglucomutase, minor isoform; catalyzes the conversion from glucose-1-phosphate to glucose-6-phosphate, which is a key step in hexose metabolism	20.2	29.9	18.5	42.4
YHR127W	66.3	101.7	23.2	55.1
YOR330C MIP1 Catalytic subunit of the mitochondrial DNA polymerase	65.3	48.4	29.2	33.5
YOR207C RET1 Second-largest subunit of RNA polymerase III, which is responsible for the transcription of tRNA and 5S RNA genes, and other low molecular weight RNAs	45.1	55.4	19.1	36.3
YGR155W CYS4 Cystathionine beta-synthase, catalyzes the synthesis of cystathionine from serine and homocysteine, the first committed step in cysteine biosynthesis	140	167.9	103.4	191.8
YHR104W GRE3 Aldose reductase involved in methylglyoxal, d-xylose and arabinose metabolism; stress induced (osmotic, ionic, oxidative, heat shock, starvation and heavy metals); regulated by the HOG pathway	145.7	165.2	107.1	187.8
YBR287W ZSP1 Protein of unknown function; mutation results in a zinc sensitive phenotype	270.8	146	195.9	163.3
YDR232W HEM1 5-aminolevulinate synthase, catalyzes the first step in the heme biosynthetic pathway; an N-terminal signal sequence is required for localization to the mitochondrial matrix; expression is regulated by Hap2p-Hap3p	45.3	59.1	60.4	121.8
YDL024C DIA3 Protein of unknown function, involved in invasive and pseudohyphal growth	84.3	50	20.3	18.6
YGL156W AMS1 Vacuolar alpha mannosidase, involved in free oligosaccharide (fOS) degradation; delivered to the vacuole in a novel pathway separate from the secretory pathway	281.8	199.9	367.9	403
YBR221C PDB1 E1 beta subunit of the pyruvate dehydrogenase (PDH) complex, which is an evolutionarily-conserved multi-protein complex found in mitochondria	419.9	469.8	371	640.9
YLR332W MID2 O-glycosylated plasma membrane protein that acts as a sensor for cell wall integrity signaling and activates the pathway; interacts with Rom2p, a guanine nucleotide exchange factor for Rho1p, and with cell integrity pathway protein Zeo1p	123.9	129.7	82	132.5
YPL010W RET3 Zeta subunit of the coatomer complex (COPI), which coats Golgi-derived transport vesicles; involved in retrograde transport between Golgi and ER	199	309.5	42.5	101.9
YGR112W SHY1 Mitochondrial inner membrane protein required for normal respiration, possible chaperone involved in assembly of cytochrome c oxidase; similar to SURF1 from mammals, chickens, and D. melanogaster	16.5	18.7	11.8	20.6
YPR030W CSR2 Nuclear protein with a potential regulatory role in utilization of galactose and nonfermentable carbon sources; overproduction suppresses the lethality at high temperature of a chs5 spa2 double null mutation; potential Cdc28p substrate	65.3	18.4	41.5	18
YDL240W LRG1 Putative GTPase-activating protein (GAP) involved in the Pkc1p-mediated signaling pathway that controls cell wall integrity; appears to specifically regulate 1,3-beta-glucan synthesis	7.1	5.9	4.3	5.5
YLL015W BPT1 ABC type transmembrane transporter of MRP/CFTR family, found in vacuolar membrane, involved in the transport of unconjugated bilirubin and in heavy metal detoxification via glutathione conjugates, along with Ycf1p	86.3	67.7	32.8	39.6
YER113C	14.6	18.5	5.9	11.5
YMR286W MRPL33 Mitochondrial ribosomal protein of the large subunit	122.9	61	137.2	104.7
YNL274C	39.3	65.5	27.4	70.2
YDL206W	24.3	16.6	2	2.1
YNL241C ZWF1 Glucose-6-phosphate dehydrogenase (G6PD), catalyzes the first step of the pentose phosphate pathway; involved in adapting to oxidatve stress; homolog of the human G6PD which is deficient in patients with hemolytic anemia	148.8	110.7	156.2	178.3
YGL160W	72.6	90.7	47.7	91.4
YDR539W	23.8	19.4	1.6	2
YNL214W PEX17 Peroxisomal membrane protein component of the peroxisomal translocation machinery, required for peroxisome biogenesis, binds Pex14p	53.2	42.8	33.9	41.8
YDR387C	19.7	22.5	6.8	11.9
YGL176C	52.6	40.4	1.7	2
YJL094C KHA1 Putative K+/H+ antiporter	236	114.4	120.7	89.6
YPL028W ERG10 Acetyl-CoA C-acetyltransferase (acetoacetyl-CoA thiolase), cytosolic enzyme that transfers an acetyl group from one acetyl-CoA molecule to another, forming acetoacetyl-CoA; involved in the first step in mevalonate biosynthesis	917.9	902.3	1067	1604.7
YGL121C GPG1 Proposed gamma subunit of the heterotrimeric G protein that interacts with the receptor Grp1p; involved in regulation of pseudohyphal growth; requires Gpb1p or Gpb2p to interact with Gpa2p	137.3	227.8	49.1	124.6
YDL234C GYP7 GTPase-activating protein for yeast Rab family members including: Ypt7p (most effective), Ypt1p, Ypt31p, and Ypt32p (in vitro); involved in vesicle mediated protein trafficking	326.7	91.1	199.7	85.1
YLR420W URA4 Dihydroorotase, catalyzes the third enzymatic step in the de novo biosynthesis of pyrimidines, converting carbamoyl-L-aspartate into dihydroorotate	25.8	36.9	21.7	47.4
YCR037C PHO87 Low-affinity inorganic phosphate (Pi) transporter, involved in activation of PHO pathway; expression is independent of Pi concentration and Pho4p activity; contains 12 membrane-spanning segments	42.9	43.8	28.8	44.9
YMR258C	81.9	78.2	33	48.1
YDL027C	112	70.6	27.4	26.3
YLR218C	76.6	35.1	39.7	27.7
YGR067C	117.4	80.3	63.8	66.4
YER097W	6.9	6.4	18.5	26.1
YMR129W POM152 Nuclear pore membrane glycoprotein; may be involved in duplication of nuclear pores and nuclear pore complexes during S-phase;	32.9	31.6	24.6	35.9
YFR041C ERJ5 Endoplasmic reticulum protein that may function as a cochaperone, as suggested by the presence of a DnaJ-like domain	90.1	92.5	40.6	63.3
YGR130C	189.8	141.3	184.8	208.9
YLR406C RPL31B Protein component of the large (60S) ribosomal subunit, nearly identical to Rpl31Ap and has similarity to rat L31 ribosomal protein; associates with the karyopherin Sxm1p	109	282.3	32.7	128.5
YNL192W CHS1 Chitin synthase I, requires activation from zymogenic form in order to catalyze the transfer of N-acetylglucosamine (GlcNAc) to chitin; required for repairing the chitin septum during cytokinesis; transcription activated by mating factor	267.3	76.3	92.6	40.1
YJL196C ELO1 Elongase I, medium-chain acyl elongase, catalyzes carboxy-terminal elongation of unsaturated C12-C16 fatty acyl-CoAs to C16-C18 fatty acids	54.9	67.7	37.1	69.4
YKL112W ABF1 DNA binding protein with possible chromatin-reorganizing activity involved in transcriptional activation, gene silencing, and DNA replication and repair	46.2	50.1	51.5	84.7
YIL149C MLP2 Myosin-like protein associated with the nuclear envelope, connects the nuclear pore complex with the nuclear interior; involved in the Tel1p pathway that controls telomere length	23.6	28.8	6	11.1
YFL023W BUD27 Protein involved in bud-site selection, nutrient signaling, and gene expression controlled by the TOR kinase; diploid mutants display a random budding pattern instead of the wild-type bipolar pattern	14.9	20.5	3.6	7.5
YKL025C PAN3 Essential subunit of the Pan2p-Pan3p poly(A)-ribonuclease complex, which acts to control poly(A) tail length and regulate the stoichiometry and activity of postreplication repair complexes	31.5	41.9	28.4	57.2
YML112W CTK3 Gamma subunit of C-terminal domain kinase I (CTDK-I), which phosphorylates the C-terminal repeated domain of the RNA polymerase II large subunit (Rpo21p) to affect both transcription and pre-mRNA 3' end processing	17.7	24.1	6.5	13.4
YPL015C HST2 Cytoplasmic member of the silencing information regulator 2 (Sir2) family of NAD(+)-dependent protein deacetylases; modulates nucleolar (rDNA) and telomeric silencing; possesses NAD(+)-dependent histone deacetylase activity in vitro	75.3	112.4	68.7	155.2
YHR037W PUT2 Delta-1-pyrroline-5-carboxylate dehydrogenase, nuclear-encoded mitochondrial protein involved in utilization of proline as sole nitrogen source; deficiency of the human homolog causes HPII, an autosomal recessive inborn error of metabolism	119.8	84.6	177.8	190
YBL069W AST1 Peripheral membrane protein that interacts with the plasma membrane ATPase Pma1p and has a role in its targeting to the plasma membrane, possibly by influencing its incorporation into lipid rafts	9.8	19.8	10.6	32.4
YIL035C CKA1 Alpha catalytic subunit of casein kinase 2, a Ser/Thr protein kinase with roles in cell growth and proliferation; the holoenzyme also contains CKA2, CKB1 and CKB2, the many substrates include transcription factors and all RNA polymerases	45.4	78.8	10.4	27.3
YOL119C MCH4 Protein with similarity to mammalian monocarboxylate permeases, which are involved in transport of monocarboxylic acids across the plasma membrane; mutant is not deficient in monocarboxylate transport	67.7	109.7	37.3	91.4
YOL127W RPL25 Primary rRNA-binding ribosomal protein component of the large (60S) ribosomal subunit, has similarity to E. coli L23 and rat L23a ribosomal proteins; binds to 26S rRNA via a conserved C-terminal motif	483.1	1115.1	139.5	486.6
YER054C GIP2 Putative regulatory subunit of the protein phosphatase Glc7p, involved in glycogen metabolism; contains a conserved motif (GVNK motif) that is also found in Gac1p, Pig1p, and Pig2p	189.7	167.1	66.8	88.9
YGL150C INO80 ATPase that forms a large complex, containing actin and several actin-related proteins, that has chromatin remodeling activity and 3' to 5' DNA helicase activity in vitro; shows similarity to the Snf2p family of ATPases	31.4	34.7	18.4	30.7
YOR328W PDR10 ABC (ATP-binding cassette) membrane pump involved in the pleiotropic drug resistance network, regulated by Pdr1p and Pdr3p, similar to Pdr5p	81.4	84.1	20.9	32.6
YLR178C TFS1 Carboxypeptidase Y inhibitor, function requires acetylation by the NatB N-terminal acetyltransferase; phosphatidylethanolamine-binding protein involved in protein kinase A signaling pathway	218.1	233.6	155	250.6
YOR313C SPS4 Protein whose expression is induced during sporulation; not required for sporulation; heterologous expression in E. coli induces the SOS response that senses DNA damage	13241.8	4630.5	5871.2	3098.4
YHR108W GGA2 Golgi-localized protein with homology to gamma-adaptin, interacts with and regulates Arf1p and Arf2p in a GTP-dependent manner in order to facilitate traffic through the late Golgi	43.9	46.7	22.8	36.6
YDR073W SNF11 One of 11 subunits of the SWI/SNF chromatin remodeling complex involved in transcriptional regulation; interacts with a highly conserved 40-residue sequence of Snf2p	89.3	48.9	74.2	61.3
YFR044C	99.1	119.7	107.8	196.3
YDR079W PET100 Chaperone that specifically facilitates the assembly of cytochrome c oxidase, located in the mitochondrial inner membrane	99.4	112.1	33.3	56.6
YFL021C-A	3.1	2.4	0.6	0.7
YOR153W PDR5 Short-lived membrane ABC (ATP-binding cassette) transporter, actively exports various drugs, expression regulated by Pdr1p; also involved in steroid transport, cation resistance, and cellular detoxification during exponential growth	37.6	29.6	12.9	15.3
YLR134W PDC5 Minor isoform of pyruvate decarboxylase, key enzyme in alcoholic fermentation, decarboxylates pyruvate to acetaldehyde, regulation is glucose- and ethanol-dependent, repressed by thiamine, involved in amino acid catabolism	15.9	11.4	2.5	2.7
YDR275W BSC2 Protein of unknown function, ORF exhibits genomic organization compatible with a translational readthrough-dependent mode of expression	719.7	994.8	373.5	777
YLR270W DCS1 Non-essential hydrolase involved in mRNA decapping, may function in a feedback mechanism to regulate deadenylation, contains pyrophosphatase activity and a HIT (histidine triad) motif; interacts with neutral trehalase Nth1p	121.6	146.5	132	239.2
YMR179W SPT21 Protein required for normal transcription at several loci including HTA2-HTB2 and HHF2-HHT2, but not required at the other histone loci; functionally related to Spt10p	37.5	23.4	26	24.4
YJL207C	18.6	20.8	4.7	7.9
YHR132C ECM14 Putative metalloprotease with similarity to the zinc carboxypeptidase family, required for normal cell wall assembly	122.3	142.8	102.8	180.4
YDR435C PPM1 Carboxyl methyl transferase, methylates the C terminus of the protein phosphatase 2A catalytic subunit (Pph21p or Pph22p), which is important for complex formation with regulatory subunits	149.9	82.9	59.2	49.2
YDR353W TRR1 Cytoplasmic thioredoxin reductase, key regulatory enzyme that determines the redox state of the thioredoxin system, which acts as a disulfide reductase system and protects cells against both oxidative and reductive stress	63.2	91.2	102.4	221.7
YJR122W CAF17 Mitochondrial protein that interacts with Ccr4p in the two-hybrid system; 3'-untranslated region contains a putative mRNA localization element common to genes encoding mitochondrial proteins	32.5	25.1	10.2	11.8
YPR133W-A TOM5 Small mitochondrial outer membrane protein crucial to a binding relay for the import of proteins into mitochondria; subunit on the outer mouth of the TOM channel that accepts precursors from the receptors Tom20p and Tom22p	386.1	150.2	838.6	488.4
YKR054C DYN1 Cytoplasmic heavy chain dynein, microtubule motor protein, required for anaphase spindle elongation; involved in spindle assembly, chromosome movement, and spindle orientation during cell division, targeted to microtubule tips by Pac1p	26.3	21	7.7	9.2
YPL163C SVS1 Cell wall and vacuolar protein, required for wild-type resistance to vanadate	36.7	51.7	2.8	5.9
YKL148C SDH1 Flavoprotein subunit of succinate dehydrogenase (Sdh1p, Sdh2p, Sdh3p, Sdh4p), which couples the oxidation of succinate to the transfer of electrons to ubiquinone	276.2	208.6	267.3	301.9
YPR100W MRPL51 Mitochondrial ribosomal protein of the large subunit	164	121.6	113.7	126
YNL055C POR1 Mitochondrial porin (voltage-dependent anion channel), outer membrane protein required for the maintenance of mitochondrial osmotic stability and mitochondrial membrane permeability	1551.7	1660.1	3983.2	6359.3
YJR117W STE24 Highly conserved zinc metalloprotease that functions in two steps of a-factor maturation, C-terminal CAAX proteolysis and the first step of N-terminal proteolytic processing; contains multiple transmembrane spans	267.4	285.3	303.3	482.9
YKL070W	14.1	9.8	8.1	8.4
YDL086W	121.4	155.5	103.7	198.1
YDR100W TVP15 Integral membrane protein localized to late Golgi vesicles along with the v-SNARE Tlg2p	138.7	157.7	158.5	268.6
YMR094W CTF13 Subunit of the CBF3 complex, which binds to the CDE III element of centromeres, bending the DNA upon binding, and may be involved in sister chromatid cohesion during mitosis	7.5	12	3.9	9.3
YLR247C	56.5	38.6	17.1	17.4
YGL203C KEX1 Protease involved in the processing of killer toxin and alpha factor precursor; cleaves Lys and Arg residues from the C-terminus of peptides and proteins	56.1	85	27.7	62.5
YBL113C;YIL177C;YNL339C;YOR396W	514	469.5	23.9	32.5
YNL122C	58.3	44.5	69.8	79.3
YML023C NSE5 Protein required for cell viability	22.6	35.2	2.2	5.1
YLR190W MMR1 Phosphorylated protein of the mitochondrial outer membrane, localizes only to mitochondria of the bud; interacts with Myo2p to mediate mitochondrial distribution to buds; mRNA is targeted to the bud via the transport system involving She2p	32.3	48.7	16.4	36.8
YNL190W	134.6	115.8	188.6	241.4
YGL215W CLG1 Cyclin-like protein that interacts with Pho85p; has sequence similarity to G1 cyclins PCL1 and PCL2	167.6	155.5	90.8	125.3
YEL003W GIM4 Subunit of the heterohexameric cochaperone prefoldin complex which binds specifically to cytosolic chaperonin and transfers target proteins to it	272.4	270.3	106.2	156.7
YOL005C RPB11 RNA polymerase II subunit B12.5; part of central core; similar to Rpc19p and bacterial alpha subunit	83.2	103.7	107.1	198.4
YHR163W SOL3 6-phosphogluconolactonase, catalyzes the second step of the pentose phosphate pathway; weak multicopy suppressor of los1-1 mutation; homologous to Sol2p and Sol1p	28.2	37.3	16.8	33
YIL066C RNR3 Ribonucleotide-diphosphate reductase (RNR), large subunit; the RNR complex catalyzes the rate-limiting step in dNTP synthesis and is regulated by DNA replication and DNA damage checkpoint pathways via localization of the small subunits	5.9	5.4	3.9	5.3
YGR001C	76.2	83.9	51.9	84.8
YMR171C	37.5	70.9	15.4	43.2
YDR022C CIS1 Protein of unknown function that may be involved in microtubule organization; high-copy suppressor of CIK1 deletion	51	59.3	25.8	44.5
YMR095C SNO1 Protein of unconfirmed function, involved in pyridoxine metabolism; expression is induced during stationary phase; forms a putative glutamine amidotransferase complex with Snz1p, with Sno1p serving as the glutaminase	102.6	189.2	53.5	146.3
YIL156W-B	478.9	366.6	409.4	464.6
YBR302C COS2 Protein of unknown function, member of a family of conserved, often subtelomerically-encoded proteins	80	49.6	17.3	15.9
YLL030C	47.5	61.8	1.4	2.7
YOR374W ALD4 Mitochondrial aldehyde dehydrogenase, required for growth on ethanol and conversion of acetaldehyde to acetate; activity is K+ dependent; utilizes NADP+ or NAD+ equally as coenzymes; expression is glucose repressed	1473.8	1170.2	3430.8	4036.3
YER145C FTR1 High affinity iron permease involved in the transport of iron across the plasma membrane; forms complex with Fet3p; expression is regulated by iron	108	54.5	68.9	51.5
YOR237W HES1 Protein implicated in the regulation of ergosterol biosynthesis; one of a seven member gene family with a common essential function and non-essential unique functions; similar to human oxysterol binding protein (OSBP)	82.9	84.3	38.4	57.8
YMR303C ADH2 Glucose-repressible alcohol dehydrogenase II, catalyzes the conversion of ethanol to acetaldehyde; involved in the production of certain carboxylate esters; regulated by ADR1	1214.3	578.8	2540.7	1792.1
YAL020C ATS1 Protein with a potential role in regulatory interactions between microtubules and the cell cycle, as suggested by genetic and physical interactions with Nap1p and genetic interactions with TUB1	9.4	16	5.8	14.6
YBL063W KIP1 Kinesin-related motor protein required for mitotic spindle assembly and chromosome segregation; functionally redundant with Cin8p	49	44.6	18.8	25.3
YDL160C DHH1 Cytoplasmic DExD/H-box helicase, stimulates mRNA decapping, coordinates distinct steps in mRNA function and decay, interacts with both the decapping and deadenylase complexes, may have a role in mRNA export and translation	202.5	165.4	192.2	232.1
YMR203W TOM40 Component of the TOM (translocase of outer membrane) complex responsible for recognition and initial import steps for all mitochondrially directed proteins; constitutes the core element of the protein conducting pore	152.4	83.1	255.8	206.2
YDL141W BPL1 Biotin:apoprotein ligase, covalently modifies proteins with the addition of biotin, required for acetyl-CoA carboxylase (Acc1p) holoenzyme formation	17.8	22.3	13.5	25
YBR052C RFS1 Protein of unknown function; member of a flavodoxin-like fold protein family that includes Pst2p and Ycp4p; green fluorescent protein (GFP)-fusion protein localizes to the cytoplasm in a punctate pattern	277.2	250.2	113	150.7
YKL081W TEF4 Translation elongation factor EF-1 gamma	76.8	134.7	49.2	127.5
YJL161W FMP33 The authentic, non-tagged protein was localized to the mitochondria	65.5	38.8	26.4	23.1
YGL026C TRP5 Tryptophan synthase involved in tryptophan biosynthesis, regulated by the general control system of amino acid biosynthesis	60.7	81.4	45.6	90.3
YDR019C GCV1 T subunit of the mitochondrial glycine decarboxylase complex, required for the catabolism of glycine to 5,10-methylene-THF; expression is regulated by levels of levels of 5,10-methylene-THF in the cytoplasm	413.4	941.8	356.8	1200
YKL065C YET1 Endoplasmic reticulum transmembrane protein, homolog of human BAP31 protein	357.2	368.4	149.1	227
YDL159W STE7 Signal transducing MAP kinase kinase involved in pheromone response, where it phosphorylates Fus3p, and in the pseudohyphal/invasive growth pathway, through phosphorylation of Kss1p; phosphorylated by Ste11p, degraded by ubiquitin pathway	22.6	20.7	21.9	29.6
YJR065C ARP3 Essential component of the Arp2/3 complex, which is a highly conserved actin nucleation center required for the motility and integrity of actin patches; involved in endocytosis and membrane growth and polarity	110.5	108.3	124.6	180.2
YNL250W RAD50 Subunit of MRX complex, with Mre11p and Xrs2p, involved in processing double-strand DNA breaks in vegetative cells, initiation of meiotic DSBs, telomere maintenance, and nonhomologous end joining	31.3	50	15.7	37
YDR038C;YDR040C	751.7	308.4	579.5	350.7
YDR341C	74.9	126.2	47.4	117.8
YMR297W PRC1 Vacuolar carboxypeptidase Y (proteinase C), involved in protein degradation in the vacuole and required for full protein degradation during sporulation	801.1	763.3	898.7	1262.4
YML110C COQ5 2-hexaprenyl-6-methoxy-1,4-benzoquinone methyltransferase, involved in ubiquinone (Coenzyme Q) biosynthesis; located in mitochondria	166.3	149.8	98.6	130.9
YMR035W IMP2 Catalytic subunit of the mitochondrial inner membrane peptidase complex, required for maturation of mitochondrial proteins of the intermembrane space; complex contains Imp1p and Imp2p (both catalytic subunits), and Som1p	22.8	46.9	3.2	9.7
YML037C	3.5	4.7	4.7	9.3
YHR137W ARO9 Aromatic aminotransferase, catalyzes the first step of tryptophan, phenylalanine, and tyrosine catabolism	230.1	301.2	246.8	476
YNL061W NOP2 Probable RNA m(5)C methyltransferase, essential for processing and maturation of 27S pre-rRNA and large ribosomal subunit biogenesis; localized to the nucleolus; constituent of 66S pre-ribosomal particles	38	64.5	10.2	25.5
YDR237W MRPL7 Mitochondrial ribosomal protein of the large subunit	39.9	30.8	22	25
YEL052W AFG1 Putative ATPase of the CDC48/PAS1/SEC18 (AAA) family, localized to mitochondria	37	34.3	14.6	19.9
YGL023C PIB2 Protein binding phosphatidylinositol 3-phosphate, involved in telomere-proximal repression of gene expression; similar to Fab1 and Vps27	16.5	19.6	21.7	37.9
YER146W LSM5 Lsm (Like Sm) protein; part of heteroheptameric complexes (Lsm2p-7p and either Lsm1p or 8p): cytoplasmic Lsm1p complex involved in mRNA decay; nuclear Lsm8p complex part of U6 snRNP and possibly involved in processing tRNA, snoRNA, and rRNA	427.6	490.4	417.7	704.2
YER123W YCK3 Palmitoylated, vacuolar membrane-localized casein kinase I isoform; negatively regulates vacuole fusion during hypertonic stress via phosphorylation of the HOPS complex subunit, Vps41p; shares overlapping essential functions with Hrr25p	164.2	146.8	78	102.5
YJL132W	61.4	93.9	27.9	62.7
YLR099W-A	309.8	112	181.7	96.5
YPR069C SPE3 Spermidine synthase, involved in biosynthesis of spermidine and also in biosynthesis of pantothenic acid; spermidine is required for growth of wild-type cells	320	276.6	232.1	294.7
YLR422W	14.1	16	5.1	8.5
YCR044C PER1 Vacuolar membrane protein that seems to be involved in Mn2+ homeostasis; mutant is dependent on activation of the unfolded protein response pathway for viability	15.1	24.5	6.8	16.2
YHR026W PPA1 Subunit c'' of the vacuolar ATPase, which functions in acidification of the vacuole; one of three proteolipid subunits of the V0 domain	165.4	198.6	102.7	181
YJR137C ECM17 Sulfite reductase beta subunit, involved in amino acid biosynthesis, transcription repressed by methionine	27.5	18.5	47.5	46.9
YAL063C FLO9 Lectin-like protein with similarity to Flo1p, thought to be expressed and involved in flocculation	21.8	28.7	5.9	11.4
YDR456W NHX1 Endosomal Na+/H+ exchanger, required for intracellular sequestration of Na+; required for osmotolerance to acute hypertonic shock	44.4	70.1	20.2	46.8
YLR034C SMF3 Putative divalent metal ion transporter involved in iron homeostasis; transcriptionally regulated by metal ions; member of the Nramp family of metal transport proteins	90.3	69.9	57.4	65.2
YKL197C PEX1 AAA-family ATPase peroxin required for peroxisome biogenesis, contains two 230 amino acid ATP-binding AAA cassettes, upregulated in anaerobiosis; Pex1p and Pex6p interact via their N-terminal AAA-cassettes	34.5	22.9	42.2	41.1
YKR076W ECM4 Non-essential protein of unknown function; similar to Ygr154cp	144.1	108.6	72	79.6
YKR083C DAD2 Essential protein, component of the DASH complex; involved in spindle integrity and kinetochore function; interacts with Duo1p and Dam1p; localizes to intranuclear spindles and kinetochore	126.7	99.9	43.5	50.3
YMR096W SNZ1 Protein involved in vitamin B6 biosynthesis; member of a stationary phase-induced gene family; coregulated with SNO1; interacts with Sno1p and with Yhr198p, perhaps as a multiprotein complex containing other Snz and Sno proteins	433.4	567.9	282.8	543.3
YPL256C CLN2 G1 cyclin involved in regulation of the cell cycle; activates Cdc28p kinase to promote the G1 to S phase transition; late G1 specific expression depends on transcription factor complexes, MBF (Swi6p-Mbp1p) and SBF (Swi6p-Swi4p)	5.2	6.7	1.8	3.4
YGR284C ERV29 Protein localized to COPII-coated vesicles, involved in vesicle formation and incorporation of specific secretory cargo	172.4	209.6	171.8	305.8
YGL229C SAP4 Protein required for function of the Sit4p protein phosphatase, member of a family of similar proteins that form complexes with Sit4p, including Sap155p, Sap185p, and Sap190p	28.9	21.3	5.1	5.5
YDR069C DOA4 Ubiquitin hydrolase, required for recycling ubiquitin from proteasome-bound ubiquitinated intermediates, acts at the late endosome/prevacuolar compartment to recover ubiquitin from ubiquitinated membrane proteins en route to the vacuole	19.8	14.2	8.2	8.6
YPL269W KAR9 Karyogamy protein required for correct positioning of the mitotic spindle and for orienting cytoplasmic microtubules, localizes at the shmoo tip in mating cells and at the tip of the growing bud in small-budded cells through anaphase	13.9	16	4.1	6.9
YEL020C	23.7	40.6	11.5	28.8
YBR140C IRA1 GTPase-activating protein that negatively regulates RAS by converting it from the GTP- to the GDP-bound inactive form, required for reducing cAMP levels under nutrient limiting conditions, mediates membrane association of adenylate cyclase	42.9	37.3	15.9	20.2
YAL023C PMT2 Protein O-mannosyltransferase, transfers mannose residues from dolichyl phosphate-D-mannose to protein serine/threonine residues; acts in a complex with Pmt1p, can instead interact with Pmt5p in some conditions; target for new antifungals	66.9	73.6	85.3	137.1
YER040W GLN3 Transcriptional activator of genes regulated by nitrogen catabolite repression (NCR), localization and activity regulated by quality of nitrogen source	16	14.9	13.6	18.5
YHR028C DAP2 Dipeptidyl aminopeptidase, synthesized as a glycosylated precursor; localizes to the vacuolar membrane; similar to Ste13p	57.9	60.3	23.6	35.9
YDR538W PAD1 Phenylacrylic acid decarboxylase, confers resistance to cinnamic acid, decarboxylates aromatic carboxylic acids to the corresponding vinyl derivatives	119.7	109.3	0.3	0.4
YDL066W IDP1 Mitochondrial NADP-specific isocitrate dehydrogenase, catalyzes the oxidation of isocitrate to alpha-ketoglutarate; not required for mitochondrial respiration and may function to divert alpha-ketoglutarate to biosynthetic processes	81	129.7	90.8	212.3
YPR024W YME1 Subunit, with Mgr1p, of the mitochondrial inner membrane i-AAA protease complex, which is responsible for degradation of unfolded or misfolded mitochondrial gene products; mutation causes an elevated rate of mitochondrial turnover	81.8	87.8	67.9	106.3
YDR422C SIP1 Alternate beta-subunit of the Snf1p kinase complex, may confer substrate specificity; vacuolar protein containing KIS (Kinase-Interacting Sequence) and ASC (Association with Snf1 kinase Complex) domains involved in protein interactions	25.5	31.7	21.4	38.8
YER080W FMP29 The authentic, non-tagged protein was localized to the mitochondria	47.7	48.9	56.8	84.9
YBL051C PIN4 Protein involved in G2/M phase progression and response to DNA damage, interacts with Rad53p; contains an RNA recognition motif, a nuclear localization signal, and several SQ/TQ cluster domains; hyperphosphorylated in response to DNA damage	48.5	33.4	52.7	52.9
YNL080C	172.2	137.2	130.4	151.4
YGR216C GPI1 Membrane protein involved in the synthesis of N-acetylglucosaminyl phosphatidylinositol (GlcNAc-PI), the first intermediate in the synthesis of glycosylphosphatidylinositol (GPI) anchors; human and mouse GPI1p are functional homologs	18.6	41.8	6.2	20.3
YPR188C MLC2 Regulatory light chain for the type II myosin, Myo1p; binds to an IQ motif of Myo1p, localization to the bud neck depends on Myo1p; involved in the disassembly of the Myo1p ring	115.3	151.1	77.9	148.7
YLR450W HMG2 One of two isozymes of HMG-CoA reductase that convert HMG-CoA to mevalonate, a rate-limiting step in sterol biosynthesis; overproduction induces assembly of peripheral ER membrane arrays and short nuclear-associated membrane stacks	249	283.1	269.7	446.5
YMR266W RSN1 Membrane protein of unknown function; overexpression suppresses NaCl sensitivity of sro7 mutant	77.3	71.3	21	28.2
YML076C WAR1 Homodimeric Zn2Cys6 zinc finger transcription factor; binds to a weak acid response element to induce transcription of PDR12 and FUN34, encoding an acid transporter and a putative ammonia transporter, respectively	18.7	22.8	8	14.2
YPL001W HAT1 Catalytic subunit of the Hat1p-Hat2p histone acetyltransferase complex that uses the cofactor acetyl coenzyme A, to acetylate free nuclear and cytoplasmic histone H4; involved in telomeric silencing and DNA double-strand break repair	48.7	70.8	24.1	51
YOR231W MKK1 Mitogen-activated kinase kinase involved in protein kinase C signaling pathway that controls cell integrity; upon activation by Bck1p phosphorylates downstream target, Slt2p; functionally redundant with Mkk2p	27.9	41.2	17.4	37.4
YBR191W;YPL079W	299	860.7	80.6	337.6
YDR231C COX20 Mitochondrial inner membrane protein, required for proteolytic processing of Cox2p and its assembly into cytochrome c oxidase	108.5	106.4	78.1	111.3
YNR047W	35.5	30	25.1	30.8
YIL042C	38.3	45.9	40.4	70.3
YDR051C	41.6	66	19.8	45.6
YAL026C-A	18.4	46.9	1	3.7
YGL142C GPI10 Integral membrane protein involved in glycosylphosphatidylinositol (GPI) anchor synthesis; putative alpha 1,2 mannosyltransferase required for addition of the third mannose onto the GPI core structure; human PIG-Bp is a functional homolog	34.9	46.1	17.9	34.3
YOL033W MSE1 Mitochondrial glutamyl-tRNA synthetase, encoded by a nuclear gene	19.2	26	8.4	16.5
YGR077C PEX8 Intraperoxisomal organizer of the peroxisomal import machinery, tightly associated with the lumenal face of the peroxisomal membrane, essential for peroxisome biogenesis, binds PTS1-signal receptor Pex5p	21.1	25.5	10.9	19.1
YGR232W NAS6 Regulatory, non-ATPase subunit of the 26S proteasome; homolog of the human oncoprotein gankyrin, which interacts with the retinoblastoma tumor suppressor (Rb) and cyclin-dependent kinase 4/6	63.5	72	23.3	38.3
YEL011W GLC3 Glycogen branching enzyme, involved in glycogen accumulation; green fluorescent protein (GFP)-fusion protein localizes to the cytoplasm in a punctate pattern	528.1	395.3	345.6	375
YPR157W	7.4	6.2	1.4	1.7
YGR020C VMA7 Subunit F of the eight-subunit V1 peripheral membrane domain of vacuolar H+-ATPase (V-ATPase), an electrogenic proton pump found throughout the endomembrane system; required for the V1 domain to assemble onto the vacuolar membrane	185.7	317	151.8	375.2
YHR039C MSC7 Protein of unknown function, green fluorescent protein (GFP)-fusion protein localizes to the endoplasmic reticulum; msc7 mutants are defective in directing meiotic recombination events to homologous chromatids	42.9	38.4	19.6	25.4
YER190W;YGR296W;YJL225C;YNL339C;YNL339C	232.9	160.9	6.7	6.7
YPR118W	14.2	14.3	5.9	8.6
YDR500C RPL37B Protein component of the large (60S) ribosomal subunit, has similarity to Rpl37Ap and to rat L37 ribosomal protein	319.8	696.9	112.7	355.3
YBR157C ICS2 Protein of unknown function; null mutation does not confer any obvious defects in growth, spore germination, viability, or carbohydrate utilization	21.7	13	6	5.2
YOR037W CYC2 Mitochondrial protein required for normal abundance of mitochondrial cytochrome c (Cyc1p) and for mitochondrial osmotic stability; may be involved in regulating the activity of cytochrome c heme lyase (Cyc3p); potential Cdc28p substrate	23.3	25.2	6.2	9.7
YLR390W-A CCW14 Covalently linked cell wall glycoprotein, present in the inner layer of the cell wall	429.7	502.2	371	627.1
YML028W TSA1 Ubiquitous housekeeping thioredoxin peroxidase, reduces reactive oxygen, nitrogen and sulfur species using thioredoxin as hydrogen donor; mediates redox regulation of the nuclear localization of Yap1p; deletion results in mutator phenotype	1030.2	1187.5	1130.8	1884.5
YHR061C GIC1 Protein of unknown function involved in initiation of budding and cellular polarization, interacts with Cdc42p via the Cdc42/Rac-interactive binding (CRIB) domain	9	8.8	16.7	23.6
YNL195C	1326.5	972.5	805.1	852.9
YLR233C EST1 TLC1 RNA-associated factor involved in telomere length regulation as the recruitment subunit of the telomerase holoenzyme, has a possible role in activating Est2p-TLC1-RNA bound to the telomere	15.4	24.3	2.5	5.7
YKL018C-A	173.1	249.2	146	303.7
YHR113W	95.1	98	60	89.3
YIL109C SEC24 Component of the Sec23p-Sec24p heterodimeric complex of the COPII vesicle coat; involved in ER to Golgi transport, cargo selection and autophagy; required for the binding of the Sec13 complex to ER membranes; homologous to Lst1p and Lss1p	53.7	57.3	85.5	131.7
YAL030W SNC1 Vesicle membrane receptor protein (v-SNARE) involved in the fusion between Golgi-derived secretory vesicles with the plasma membrane; proposed to be involved in endocytosis; member of the synaptobrevin/VAMP family of R-type v-SNARE proteins	167.7	194.5	164.2	274.9
YKL116C PRR1 Protein kinase with a possible role in MAP kinase signaling in the pheromone response pathway	32.7	43.2	19.2	36.6
YFR033C QCR6 Subunit 6 of the ubiquinol cytochrome-c reductase complex, which is a component of the mitochondrial inner membrane electron transport chain; highly acidic protein; required for maturation of cytochrome c1	986.2	724.8	725	768.8
YBR011C IPP1 Cytoplasmic inorganic pyrophosphatase (PPase), catalyzes the rapid exchange of oxygens from Pi with water, highly expressed and essential for viability, active-site residues show identity to those from E. coli PPase	617	516.7	942	1138.1
YHR123W EPT1 sn-1,2-diacylglycerol ethanolamine- and cholinephosphotranferase; not essential for viability	12.7	34.2	10.2	39.6
YCR088W ABP1 Actin-binding protein of the cortical actin cytoskeleton, important for activation of the Arp2/3 complex that plays a key role actin in cytoskeleton organization	36.6	29.7	65.6	76.7
YCL064C CHA1 Catabolic L-serine (L-threonine) deaminase, catalyzes the degradation of both L-serine and L-threonine; required to use serine or threonine as the sole nitrogen source, transcriptionally induced by serine and threonine	14.1	141.1	15	216.2
YHR078W	36.8	53.4	6.7	14
YPL266W DIM1 Essential 18S rRNA dimethylase, responsible for conserved m6(2)Am6(2)A dimethylation in 3'-terminal loop of 18 S rRNA, part of 90S and 40S pre-particles in nucleolus, involved in pre-ribosomal RNA processing	42.3	72.5	12.4	30.6
YLR174W IDP2 Cytosolic NADP-specific isocitrate dehydrogenase, catalyzes oxidation of isocitrate to alpha-ketoglutarate; levels are elevated during growth on non-fermentable carbon sources and reduced during growth on glucose	269.4	361.8	237.4	459
YDR358W GGA1 Golgi-localized protein with homology to gamma-adaptin, interacts with and regulates Arf1p and Arf2p in a GTP-dependent manner in order to facilitate traffic through the late Golgi	166.3	105.8	120.7	110.5
YCR077C PAT1 Topoisomerase II-associated deadenylation-dependent mRNA-decapping factor; also required for faithful chromosome transmission, maintenance of rDNA locus stability, and protection of mRNA 3'-UTRs from trimming; functionally linked to Pab1p	42.2	37.8	81.4	104.9
YEL042W GDA1 Guanosine diphosphatase located in the Golgi, involved in the transport of GDP-mannose into the Golgi lumen by converting GDP to GMP after mannose is transferred its substrate	49.3	69.8	32.6	66.4
YAL012W CYS3 Cystathionine gamma-lyase, catalyzes one of the two reactions involved in the transsulfuration pathway that yields cysteine from homocysteine with the intermediary formation of cystathionine;	15.9	17.8	12.3	19.8
YDR284C DPP1 Diacylglycerol pyrophosphate (DGPP) phosphatase, zinc-regulated vacuolar membrane-associated lipid phosphatase, dephosphorylates DGPP to phosphatidate (PA) and Pi, then PA to diacylglycerol; involved in lipid signaling and cell metabolism	82.1	98.7	45.7	79
YIL138C TPM2 Minor isoform of tropomyosin, binds to and stabilizes actin cables and filaments, which direct polarized cell growth and the distribution of several organelles; appears to have distinct and also overlapping functions with Tpm1p	439.2	425.1	302.1	420
YDR375C BCS1 Protein of the mitochondrial inner membrane that functions as an ATP-dependent chaperone, required for the assembly of the cytochrome bc(1) complex from the Rip1p and Qcr10p proteins; member of the CDC48/PAS1/SEC18 ATPase family	34.7	33.9	12.4	17.4
YJL118W	11.6	14.2	6.6	11.6
YIL105C SLM1 Phosphoinositide PI4,5P(2) binding protein, forms a complex with Slm2p; acts downstream of Mss4p in a pathway regulating actin cytoskeleton organization in response to stress; subunit of and phosphorylated by the TORC2 complex	64.5	46.7	33.1	34.4
YDL046W NPC2 Functional homolog of human NPC2/He1, which is a cholesterol-binding protein whose deficiency causes Niemann-Pick type C2 disease involving retention of cholesterol in lysosomes	441.6	492.5	855.1	1368.5
YNL149C PGA2 Essential protein required for maturation of Gas1p and Pho8p; GFP-fusion protein localizes to the endoplasmic reticulum (ER) and YFP-fusion protein to the nuclear envelope-ER network; null mutants have a cell separation defect	894.6	1013.4	517.6	841.3
YML116W-A;YML117W	306.7	162.6	80.6	61.3
YJL026W RNR2 Ribonucleotide-diphosphate reductase (RNR), small subunit; the RNR complex catalyzes the rate-limiting step in dNTP synthesis and is regulated by DNA replication and DNA damage checkpoint pathways via localization of the small subunits	228.3	214.5	326.6	440.1
YKL129C MYO3 One of two type I myosins; localizes to actin cortical patches; deletion of MYO3 has little effect on growth, but myo3 myo5 double deletion causes severe defects in growth and actin cytoskeleton organization	35.1	29.4	34.5	41.4
YPL004C LSP1 Long chain base-responsive inhibitor of protein kinases Pkh1p and Pkh2p, acts along with Pil1p to down-regulate heat stress resistance via regulation of the Pkc1p and Ypk1p pathways; phosphorylated by Phk1p and Phk2p	589.9	507	645.5	794.6
YCR106W RDS1 Zinc cluster protein involved in conferring resistance to cycloheximide	18.1	27	3.7	7.9
YML111W BUL2 Component of the Rsp5p E3-ubiquitin ligase complex, involved in intracellular amino acid permease sorting, functions in heat shock element mediated gene expression, essential for growth in stress conditions, functional homolog of BUL1	26.5	43.2	0.6	1.4
YCR079W	54.1	69.1	27.9	51
YHR033W	539.2	425.1	746.3	841.1
YJL219W HXT9 Putative hexose transporter that is nearly identical to Hxt11p, has similarity to major facilitator superfamily (MFS) transporters, expression of HXT9 is regulated by transcription factors Pdr1p and Pdr3p	11.3	6.4	4.2	3.4
YAL053W HUF2 Protein of unknown function; green fluorescent protein (GFP)-fusion protein localizes to the cytoplasm in a punctate pattern	243.1	193.5	121.9	138.6
YGR117C	25.4	53	9.5	28.3
YOR089C VPS21 GTPase required for transport during endocytosis and for correct sorting of vacuolar hydrolases; localized in endocytic intermediates; detected in mitochondria; geranylgeranylation required for membrane association; mammalian Rab5 homolog	579.9	371.9	257	235.2
YLR438C-A LSM3 Lsm (Like Sm) protein; part of heteroheptameric complexes (Lsm2p-7p and either Lsm1p or 8p): cytoplasmic Lsm1p complex involved in mRNA decay; nuclear Lsm8p complex part of U6 snRNP and possibly involved in processing tRNA, snoRNA, and rRNA	220.9	277.1	204.7	366.2
YLR256W HAP1 Zinc finger transcription factor involved in the complex regulation of gene expression in response to levels of heme and oxygen; the S288C sequence differs from other strain backgrounds due to a Ty1 insertion in the carboxy terminus	57.8	55.4	22.9	31.3
YPR173C VPS4 AAA-type ATPase required for efficient late endosome to vacuole transport; catalyzes the release of an endosomal membrane-associated class E VPS protein complex; cytoplasmic protein that is also associated with an endosomal compartment	144.9	203.8	42.2	84.6
YFL010C;YFL010C	58.4	44.6	147.2	160.1
YLR206W ENT2 Epsin-like protein required for endocytosis and actin patch assembly and functionally redundant with Ent1p; contains clathrin-binding motif at C-terminus	91.2	112.3	55.2	96.8
YAL026C;YAL026C-A	336.3	179.9	60.4	46
YDR520C	20.1	38.9	7.3	20.1
YEL047C	39.4	80.4	61.7	179.1
YML001W YPT7 GTPase; GTP-binding protein of the rab family; required for homotypic fusion event in vacuole inheritance, for endosome-endosome fusion, similar to mammalian Rab7	266.9	341.8	205.7	374.5
YDL181W INH1 Protein that inhibits ATP hydrolysis by the F1F0-ATP synthase, inhibitory function is enhanced by stabilizing proteins Stf1p and Stf2p; has similarity to Stf1p and both Inh1p and Stf1p exhibit the potential to form coiled-coil structures	804.1	780.1	1105.4	1523.8
YHR070W TRM5 tRNA(m(1)G37)methyltransferase, methylates a tRNA base adjacent to the anticodon that has a role in prevention of frameshifting; highly conserved across Archaea, Bacteria, and Eukarya	7.5	20	5.2	19.7
YDR357C	199.2	191	50	68.1
YPL063W TIM50 Constituent of the mitochondrial inner membrane presequence translocase (TIM23 complex); may promote binding of incoming precursor proteins to the intermembrane space domain of Tom22p during translocation	45.2	58.7	29.6	54.6
YHL014C YLF2 Protein of unknown function; shares weak similarity to E. coli GTP-binding protein gtp1	20.3	26.5	8.9	16.5
YNL051W COG5 Component of the conserved oligomeric Golgi complex (Cog1p through Cog8p), a cytosolic tethering complex that functions in protein trafficking to mediate fusion of transport vesicles to Golgi compartments	28.9	32.7	13.2	21.2
YBR035C PDX3 Pyridoxine (pyridoxamine) phosphate oxidase, has homologs in E. coli and Myxococcus xanthus; transcription is under the general control of nitrogen metabolism	219.3	200.4	220.9	286.5
YER066W;YFL009W	116.4	138	41.8	70.3
YBR130C SHE3 Protein that acts as an adaptor between Myo4p and the She2p-mRNA complex; part of the mRNA localization machinery that restricts accumulation of certain proteins to the bud; also required for cortical ER inheritance	58.3	59.8	45.3	65.9
YGL252C RTG2 Sensor of mitochondrial dysfunction; regulates the subcellular location of Rtg1p and Rtg3p, transcriptional activators of the retrograde (RTG) and TOR pathways; Rtg2p is inhibited by the phosphorylated form of Mks1p	51.8	59.5	24.8	40.4
YER118C SHO1 Transmembrane osmosensor, participates in activation of both the Cdc42p- and MAP kinase-dependent filamentous growth pathway and the high-osmolarity glycerol response pathway	15.9	37.9	5	16.9
YNL091W NST1 Protein of unknown function, mediates sensitivity to salt stress; interacts physically with the splicing factor Msl1p and also displays genetic interaction with MSL1	97.3	63.6	28.4	26.3
YKL046C DCW1 Putative mannosidase, GPI-anchored membrane protein required for cell wall biosynthesis in bud formation;homologous to Dfg5p	83.5	98.6	48.8	81.6
YCR093W CDC39 Component of the CCR4-NOT complex, which has multiple roles in regulating mRNA levels including regulation of transcription and destabilizing mRNAs by deadenylation; basal transcription factor	58.7	59.3	55.1	78.8
YPL145C KES1 Member of the oxysterol binding protein family, which includes seven yeast homologs; involved in negative regulation of Sec14p-dependent Golgi complex secretory functions, peripheral membrane protein that localizes to the Golgi complex	122.5	137.6	55.3	87.9
YMR164C MSS11 Transcription factor involved in regulation of invasive growth and starch degradation; controls the activation of MUC1 and STA2 in response to nutritional signals	14.6	17	9.9	16.3
YOR043W WHI2 Protein required, with binding partner Psr1p, for full activation of the general stress response, possibly through Msn2p dephosphorylation; regulates growth during the diauxic shift; negative regulator of G1 cyclin expression	55.9	81.3	23.5	48.3
YPL003W ULA1 Protein that acts together with Uba3p to activate Rub1p before its conjugation to proteins (neddylation), which may play a role in protein degradation	47.2	39.4	13.4	15.8
YOL082W ATG19 Protein involved in the cytoplasm-to-vacuole targeting pathway and in autophagy, recognizes cargo proteins and delivers them to the preautophagosomal structure for eventual engulfment by the autophagosome and degradation	68.4	70.1	52.6	76.1
YKR022C NTR2 Essential protein that forms a dimer with Ntr1p; also forms a trimer, with Ntr2p and the DExD/H-box RNA helicase Prp43p, that is involved in spliceosome disassembly	40.8	62.4	7	15.1
YKL003C MRP17 Mitochondrial ribosomal protein of the small subunit; MRP17 exhibits genetic interactions with PET122, encoding a COX3-specific translational activator	76.3	75.5	40.5	56.5
YBL047C EDE1 Key endocytic protein involved in a network of interactions with other endocytic proteins, binds membranes in a ubiquitin-dependent manner, may also bind ubiquitinated membrane-associated proteins	80	58.2	191	195.9
YIL041W GVP36 Golgi vesicle protein of unknown function; localizes to both early and late Golgi vesicles	187.8	190.4	505.1	721.9
YGL114W	20.2	38.1	7.6	20.2
YLR245C CDD1 Cytidine deaminase; catalyzes the modification of cytidine to uridine in vitro but native RNA substrates have not been identified, localizes to both the nucleus and cytoplasm	85.1	44.3	100.2	73.5
YIL043C CBR1 Microsomal cytochrome b reductase, not essential for viability; also detected in mitochondria	82	161.5	49.6	137.6
YJL081C ARP4 Nuclear actin-related protein involved in chromatin remodeling, component of chromatin-remodeling enzyme complexes	68.1	90.8	25.2	47.3
YER015W FAA2 Long chain fatty acyl-CoA synthetase; accepts a wider range of acyl chain lengths than Faa1p, preferring C9:0-C13:0; involved in the activation of endogenous pools of fatty acids	71.3	65.2	49.1	63.2
YGL104C VPS73 Mitochondrial protein of unknown function involved in vacuolar protein sorting	20	41.9	9.3	27.4
YPL078C ATP4 Subunit b of the stator stalk of mitochondrial F1F0 ATP synthase, which is a large, evolutionarily conserved enzyme complex required for ATP synthesis	433.8	473.7	312.2	479.4
YDR194C MSS116 DEAD-box protein required for efficient splicing of mitochondrial Group I and II introns; presumed RNA helicase due to DEAD-box motif	46.8	59.9	19.9	35.8
YKL126W YPK1 Serine/threonine protein kinase required for receptor-mediated endocytosis; involved in sphingolipid-mediated and cell integrity signaling pathways; localized to the bud neck, cytosol and plasma membrane; homolog of mammalian kinase SGK	221.5	205.4	158.9	207.1
YKL109W HAP4 Subunit of the heme-activated, glucose-repressed Hap2p/3p/4p/5p CCAAT-binding complex, a transcriptional activator and global regulator of respiratory gene expression; provides the principal activation function of the complex	564.9	604.6	84.7	127.4
YDR178W SDH4 Membrane anchor subunit of succinate dehydrogenase (Sdh1p, Sdh2p, Sdh3p, Sdh4p), which couples the oxidation of succinate to the transfer of electrons to ubiquinone	1301.7	1211.5	864.5	1130.6
YBR019C GAL10 UDP-glucose-4-epimerase, catalyzes the interconversion of UDP-galactose and UDP-D-glucose in galactose metabolism; also catalyzes the conversion of alpha-D-glucose or alpha-D-galactose to their beta-anomers	16.1	3.4	9.1	2.7
YMR102C	20.8	21.9	10.9	16.1
YHL020C OPI1 Transcriptional regulator of a variety of genes; phosphorylation by protein kinase A stimulates Opi1p function in negative regulation of phospholipid biosynthetic genes	68.6	113.8	34.3	79.8
YOL060C MAM3 Protein required for normal mitochondrial morphology, has similarity to hemolysins	57.4	45.1	55.2	60.8
YGR220C MRPL9 Mitochondrial ribosomal protein of the large subunit	62.2	52.8	36.5	43.4
YHR107C CDC12 Component of the septin ring of the mother-bud neck that is required for cytokinesis; septins recruit proteins to the neck and can act as a barrier to diffusion at the membrane, and they comprise the 10nm filaments seen with EM	54.7	73.4	81.1	152.4
YIL002W-A	319.1	140	183.6	112.8
YNL047C SLM2 Phosphoinositide PI4,5P(2) binding protein, forms a complex with Slm1p; acts downstream of Mss4p in a pathway regulating actin cytoskeleton organization in response to stress; subunit of and phosphorylated by the TORC2 complex	16.2	16.9	13.7	20
YBR078W ECM33 GPI-anchored protein of unknown function, has a possible role in apical bud growth; GPI-anchoring on the plasma membrane crucial to function; similar to Sps2p and Pst1p	308.8	292.7	125	165.8
YLR347C KAP95 Karyopherin beta, forms a dimeric complex with Srp1p (Kap60p) that mediates nuclear import of cargo proteins via a nuclear localization signal (NLS), interacts with nucleoporins to guide transport across the nuclear pore complex	54.7	71.7	104.2	191.1
YKR036C CAF4 WD40 repeat-containing protein associated with the CCR4-NOT complex, interacts in a Ccr4p-dependent manner with Ssn2p	18.6	28.9	6.9	15
YHR183W GND1 6-phosphogluconate dehydrogenase (decarboxylating), catalyzes an NADPH regenerating reaction in the pentose phosphate pathway; required for growth on D-glucono-delta-lactone and adaptation to oxidative stress	408.1	153.5	427.2	224.8
YER132C PMD1 Protein with an N-terminal kelch-like domain, putative negative regulator of early meiotic gene expression; required, with Mds3p, for growth under alkaline conditions	32.3	22.7	5.9	5.8
YGR285C ZUO1 Cytosolic ribosome-associated chaperone, contains a DnaJ domain; together with Ssz1p, acts as a chaperone for nascent polypeptide chains	71.1	93.1	79.4	145.4
YBR073W RDH54 DNA-dependent ATPase, stimulates strand exchange by modifying the topology of double-stranded DNA; involved in the recombinational repair of double-strand breaks in DNA during mitosis and meiosis; proposed to be involved in crossover interference	26.7	47.3	18.9	46.8
YGR106C	238.9	280.7	154.8	254.2
YPL234C TFP3 Vacuolar ATPase V0 domain subunit c', involved in proton transport activity; hydrophobic integral membrane protein (proteolipid) containing four transmembrane segments; N and C termini are in the vacuolar lumen	230.1	292	142.6	252.8
YDL190C UFD2 Ubiquitin chain assembly factor (E4) that cooperates with a ubiquitin-activating enzyme (E1), a ubiquitin-conjugating enzyme (E2), and a ubiquitin protein ligase (E3) to conjugate ubiquitin to substrates; also functions as an E3	93.9	102.5	55.1	84
YHR063C PAN5 2-dehydropantoate 2-reductase, part of the pantothenic acid pathway, structurally homologous to E. coli panE	65.4	92.9	52	103.1
YHR007C ERG11 Lanosterol 14-alpha-demethylase, catalyzes the C-14 demethylation of lanosterol to form 4,4''-dimethyl cholesta-8,14,24-triene-3-beta-ol in the ergosterol biosynthesis pathway; member of the cytochrome P450 family	265.8	331.1	176.4	306.7
YKR011C	239	218.8	196.1	250.4
YBR009C;YNL030W	16069.9	11019.8	7832.8	7484.8
YLR069C MEF1 Mitochondrial elongation factor involved in translational elongation	30	28.6	18.3	24.3
YPL205C	1.3	2.4	1.4	3.6
YAR019W-A	3.9	1.2	2.1	0.9
YJL054W TIM54 Component of the mitochondrial Tim54p-Tim22p complex involved in insertion of polytopic proteins into the inner membrane	30.6	42.8	13.5	26.3
YBR093C PHO5 Repressible acid phosphatase (1 of 3) that also mediates extracellular nucleotide-derived phosphate hydrolysis; secretory pathway derived cell surface glycoprotein; induced by phosphate starvation and coordinately regulated by PHO4 and PHO2	58.4	40.3	7.7	7.4
YLR389C STE23 Metalloprotease involved, with homolog Axl1p, in N-terminal processing of pro-a-factor to the mature form; member of the insulin-degrading enzyme family	21.1	27.8	12.1	22.2
YOR136W IDH2 Subunit of mitochondrial NAD(+)-dependent isocitrate dehydrogenase, which catalyzes the oxidation of isocitrate to alpha-ketoglutarate in the TCA cycle	601.5	690.4	983	1570.6
YGL146C	40.8	29.8	24.1	24.5
YBR026C ETR1 2-enoyl thioester reductase, member of the medium chain dehydrogenase/reductase family; localized to in mitochondria, where it has a probable role in fatty acid synthesis	227.8	348.6	226.4	482
YDR171W HSP42 Small cytosolic stress-induced chaperone that forms barrel-shaped oligomers and suppresses the aggregation of non-native proteins; oligomer dissociation is not required for function; involved in cytoskeleton reorganization after heat shock	734.8	745.1	652.5	920.3
YJL062W-A	110.4	53.6	239.8	161.9
YLR447C VMA6 Subunit D of the five-subunit V0 integral membrane domain of vacuolar H+-ATPase (V-ATPase), an electrogenic proton pump found in the endomembrane system; stabilizes VO subunits; required for V1 domain assembly on the vacuolar membrane	220.8	273.7	143.2	246.8
YER076C	40.1	34.9	6.7	8.1
YGL139W HUF3 Hypothetical protein	28.7	35.3	24	41
YOR121C	3	2.7	1.6	2
YBR024W SCO2 Protein anchored to the mitochondrial inner membrane, similar to Sco1p and may have a redundant function with Sco1p in delivery of copper to cytochrome c oxidase; interacts with Cox2p	87.8	89.3	56.4	79.6
YKL006W RPL14A N-terminally acetylated protein component of the large (60S) ribosomal subunit, nearly identical to Rpl14Bp and has similarity to rat L14 ribosomal protein; rpl14a csh5 double null mutant exhibits synthetic slow growth	349.6	595.3	97.9	231.3
YMR196W	200.7	262.6	242.6	440.4
YJR106W ECM27 Non-essential protein of unknown function	77.1	50.6	48.9	44.5
YOR002W ALG6 Glucosyltransferase, involved in transfer of oligosaccharides from dolichyl pyrophosphate to asparagine residues of proteins during N-linked protein glycosylation; mutations in human ortholog are associated with disease	58.8	78.9	27.2	50.6
YDR388W RVS167 Actin-associated protein, subunit of a complex (Rvs161p-Rvs167p) involved in regulation of actin cytoskeleton, endocytosis, and viability following starvation or osmotic stress; homolog of mammalian amphiphysin	108.6	106.2	132.7	179.9
YEL002C WBP1 Beta subunit of the oligosaccharyl transferase (OST) glycoprotein complex; required for N-linked glycosylation of proteins in the endoplasmic reticulum	88.2	130.4	86.9	178
YER020W GPA2 Nucleotide binding alpha subunit of the heterotrimeric G protein that interacts with the receptor Gpr1p, has signaling role in response to nutrients; green fluorescent protein (GFP)-fusion protein localizes to the cell periphery	266.2	79.6	175.3	72.6
YDR448W ADA2 Transcription coactivator, component of the ADA and SAGA transcriptional adaptor/HAT (histone acetyltransferase) complexes	14.5	21.7	6.9	14.3
YMR315W	102.3	150.7	75.4	153.8
YLR094C GIS3 Protein of unknown function	75.9	55.9	147.2	150.1
YKL130C SHE2 RNA-binding protein that binds specific mRNAs and interacts with She3p; part of the mRNA localization machinery that restricts accumulation of certain proteins to the bud	40.7	55.2	33	61.9
YGR086C PIL1 Long chain base-responsive inhibitor of protein kinases Pkh1p and Pkh2p, acts along with Lsp1p to down-regulate heat stress resistance via regulation of the Pkc1p and Ypk1p pathways; phosphorylated by Phk1p and Phk2p	922	661.1	1524.8	1511.9
YPR175W DPB2 Second largest subunit of DNA polymerase II (DNA polymerase epsilon), required for normal yeast chromosomal replication; expression peaks at the G1/S phase boundary; potential Cdc28p substrate	10.8	14.3	7.1	13
YMR299C DYN3 Dynein light intermediate chain (LIC); localizes with dynein, null mutant is defective in nuclear migration	97.2	78.8	15.7	17.6
YDL140C RPO21 RNA polymerase II largest subunit B220, part of central core; phosphorylation of C-terminal heptapeptide repeat domain regulates association with transcription and splicing factors; similar to bacterial beta-prime	40	34.7	22.1	26.5
YHR051W COX6 Subunit VI of cytochrome c oxidase, which is the terminal member of the mitochondrial inner membrane electron transport chain; expression is regulated by oxygen levels	702.4	838.2	625.6	1031.4
YBR225W	21.7	26.2	25	41.7
YOL027C MDM38 Mitochondrial inner membrane protein, required for K+/H+ exchange and for normal mitochondrial morphology and inheritance; human ortholog Letm1 is implicated in Wolf-Hirschhorn syndrome	41.7	47.9	24.9	39.5
YGL115W SNF4 Protein kinase activator found in a complex containing Snf1p and members of the Sip1p/Sip2p/Gal83p family; activates the Snf1p protein kinase; involved in expression of glucose-repressed genes, sporulation, and peroxisome biogenesis	83.9	93.6	27.2	41.9
YCR053W THR4 Threonine synthase, conserved protein that catalyzes formation of threonine from 0-phosphohomoserine; expression is regulated by the GCN4-mediated general amino acid control pathway	82.3	111.6	79.1	148.1
YDL123W SNA4 Protein of unknown function, localized to the vacuolar outer membrane	76.7	89.9	154.4	249.8
YMR004W MVP1 Protein required for sorting proteins to the vacuole; overproduction of Mvp1p suppresses several dominant VPS1 mutations; Mvp1p and Vps1p act in concert to promote membrane traffic to the vacuole	82.2	100.2	52.9	89
YPL184C	124.4	115.1	33.7	43
YMR031C	232.7	221.9	331	435
YBR235W	49.6	45.5	39	49.3
YGL011C SCL1 Alpha subunit of the 20S core complex of the 26S proteasome involved in the degradation of ubiquitinated substrates; essential for growth; detected in the mitochondria	511.9	668.1	480.5	863.6
YLR274W CDC46 Component of the hexameric MCM complex, which is important for priming origins of DNA replication in G1 and becomes an active ATP-dependent helicase that promotes DNA melting and elongation when activated by Cdc7p-Dbf4p in S-phase	115.1	149.5	53.3	95.3
YOR122C PFY1 Profilin, actin- and phosphatidylinositol 4,5-bisphosphate-binding protein, plays a role in cytoskeleton organization, required for normal timing of actin polymerization in response to thermal stress; localizes to plasma membrane and cytosol	787.9	773.6	682.7	922.6
YMR202W ERG2 C-8 sterol isomerase, catalyzes the isomerization of the delta-8 double bond to the delta-7 position at an intermediate step in ergosterol biosynthesis	221.2	374.6	121.4	282.8
YDR528W HLR1 Protein involved in regulation of cell wall composition and integrity and response to osmotic stress; overproduction suppresses a lysis sensitive PKC mutation; similar to Lre1p, which functions antagonistically to protein kinase A	6.7	11.6	2.1	5
YKL144C RPC25 RNA polymerase III subunit C25	14.8	34	3.8	12
YDL244W;YFL058W;YNL332W	48.3	79.9	32.5	73.9
YKL034W TUL1 Golgi-localized RING-finger ubiquitin ligase (E3), involved in ubiquitinating and sorting membrane proteins that contain polar transmembrane domains to multivesicular bodies for delivery to the vacuole for quality control purposes	28.8	34.8	34.2	56.8
YIL022W TIM44 Peripheral mitochondrial membrane protein involved in mitochondrial protein import, tethers essential chaperone Ssc1p to the translocon channel at the matrix side of the inner membrane	31.9	40	21.3	36.7
YDR074W TPS2 Phosphatase subunit of the trehalose-6-phosphate synthase/phosphatase complex, which synthesizes the storage carbohydrate trehalose; expression is induced by stress conditions and repressed by the Ras-cAMP pathway	240	140.8	151.6	122.2
YCL043C PDI1 Protein disulfide isomerase, multifunctional protein resident in the endoplasmic reticulum lumen, essential for the formation of disulfide bonds in secretory and cell-surface proteins, unscrambles non-native disulfide bonds	1128.5	997.3	3221.6	3911.7
YJR139C HOM6 Homoserine dehydrogenase (L-homoserine:NADP oxidoreductase), dimeric enzyme that catalyzes the third step in the common pathway for methionine and threonine biosynthesis; enzyme has nucleotide-binding, dimerization and catalytic regions	159.7	149.6	135.4	174.2
YER084W	40.8	44.8	48.3	72.8
YJR008W	162.2	165.8	59.3	83.2
YER141W COX15 Protein required for the hydroxylation of heme O to form heme A, which is an essential prosthetic group for cytochrome c oxidase	183.2	140.9	206.9	218.3
YFR050C PRE4 20S proteasome beta-type subunit	612.9	745.4	735.6	1226.7
YDL189W RBS1 Protein of unknown function, identified as a high copy suppressor of psk1 psk2 mutations that confer temperature-sensitivity for galactose utilization; proposed to bind single-stranded nucleic acids via its R3H domain	16	20.5	11.1	19.5
YGR270W YTA7 Protein of unknown function, member of CDC48/PAS1/SEC18 family of ATPases, potentially phosphorylated by Cdc28p	158.7	133	4.7	5.4
YDL004W ATP16 Delta subunit of the central stalk of mitochondrial F1F0 ATP synthase, which is a large, evolutionarily conserved enzyme complex required for ATP synthesis	336.6	413.9	365.8	616.5
YBR128C ATG14 Subunit of an autophagy-specific phosphatidylinositol 3-kinase complex (with Vps34p, Vps15p, and Vps30p) required for organization of a pre-autophagosomal structure; ATG14 transcription is activated by Gln3p during nitrogen starvation	53	54.8	10.8	15.3
YDL215C GDH2 NAD(+)-dependent glutamate dehydrogenase, degrades glutamate to ammonia and alpha-ketoglutarate; expression sensitive to nitrogen catabolite repression and intracellular ammonia levels	694.1	511.1	813.6	820.8
YLR143W	9.4	15.4	4.5	10.1
YOR150W MRPL23 Mitochondrial ribosomal protein of the large subunit	83.3	82.8	68.1	92.7
YOR149C SMP3 Alpha 1,2-mannosyltransferase involved in glycosyl phosphatidyl inositol (GPI) biosynthesis; required for addition of the fourth, side branching mannose to the GPI core structure	31	54.3	13.3	31.9
YNL045W	26.3	35	24.6	44.8
YBR106W PHO88 Probable membrane protein, involved in phosphate transport; pho88 pho86 double null mutant exhibits enhanced synthesis of repressible acid phosphatase at high inorganic phosphate concentrations	324.6	850.6	240.4	862
YDL093W PMT5 Protein O-mannosyltransferase, transfers mannose residues from dolichyl phosphate-D-mannose to protein serine/threonine residues; acts in a complex with Pmt3p, can instead interact with Pmt2p in some conditions; target for new antifungals	29.6	38.7	28.4	50.8
YFL014W HSP12 Plasma membrane localized protein that protects membranes from desiccation; induced by heat shock, oxidative stress, osmostress, stationary phase entry, glucose depletion, oleate and alcohol; regulated by the HOG and Ras-Pka pathways	8967.9	6781.5	4620.4	4778.7
YNL101W AVT4 Vacuolar transporter, exports large neutral amino acids from the vacuole; member of a family of seven S. cerevisiae genes (AVT1-7) related to vesicular GABA-glycine transporters	72.5	73.2	39.4	54.4
YDL090C RAM1 Beta subunit of the CAAX farnesyltransferase (FTase) that prenylates the a-factor mating pheromone and Ras proteins; required for the membrane localization of Ras proteins and a-factor; homolog of the mammalian FTase beta subunit	40.5	59	12.3	24.5
YOR065W CYT1 Cytochrome c1, component of the mitochondrial respiratory chain; expression is regulated by the heme-activated, glucose-repressed Hap2p/3p/4p/5p CCAAT-binding complex	374	489.4	382.8	684.7
YPL241C CIN2 Tubulin folding factor C (putative) involved in beta-tubulin (Tub2p) folding; isolated as mutant with increased chromosome loss and sensitivity to benomyl	47.6	59.2	29	49.3
YMR309C NIP1 Subunit of the eukaryotic translation initiation factor 3 (eIF3), involved in the assembly of preinitiation complex and start codon selection	35.9	60.4	23.7	54.5
YGR214W RPS0A Protein component of the small (40S) ribosomal subunit, nearly identical to Rps0Bp; required for maturation of 18S rRNA along with Rps0Bp; deletion of either RPS0 gene reduces growth rate, deletion of both genes is lethal	168.9	424.9	50.5	173.5
YLR240W VPS34 Phosphatidylinositol 3-kinase responsible for the synthesis of phosphatidylinositol 3-phosphate; forms membrane-associated signal transduction complex with Vps15p to regulate protein sorting; similar to p110 subunit of mammalian PI 3-kinase	23.1	30.7	19.9	36.1
YJL173C RFA3 Subunit of heterotrimeric Replication Factor A (RF-A), which is a highly conserved single-stranded DNA binding protein involved in DNA replication, repair, and recombination	161.3	269.8	191	436
YDL204W RTN2 Protein of unknown function; has similarity to mammalian reticulon proteins; member of the RTNLA (reticulon-like A) subfamily	88.2	187.1	72.1	208.7
YHR141C;YNL162W	656.7	1610.2	202.2	676.4
YGR146C-A	2.8	2.6	1.5	1.9
YJR031C GEA1 Guanine nucleotide exchange factor for ADP ribosylation factors (ARFs), involved in vesicular transport between the Golgi and ER, Golgi organization, and actin cytoskeleton organization; similar to but not functionally redundant with Gea2p	14.3	23.8	7.4	16.8
YGR034W RPL26B Protein component of the large (60S) ribosomal subunit, nearly identical to Rpl26Ap and has similarity to E. coli L24 and rat L26 ribosomal proteins; binds to 5.8S rRNA	258.4	572.4	64.8	195.8
YOR181W LAS17 Actin assembly factor, activates the Arp2/3 protein complex that nucleates branched actin filaments; localizes with the Arp2/3 complex to actin patches; homolog of the human Wiskott-Aldrich syndrome protein (WASP)	10.1	12.6	16.4	27.9
YGL127C SOH1 Subunit of the RNA polymerase II mediator complex (middle module); associates with core polymerase subunits to form the RNA polymerase II holoenzyme; conserved with other metazoan MED31 subunits	51.7	43.6	36.1	41.5
YJR014W TMA22 Hypothetical protein	119.8	150.7	71.1	121.9
YMR059W SEN15 Subunit of the tRNA splicing endonuclease, which is composed of Sen2p, Sen15p, Sen34p, and Sen54p	23.3	30.3	20.1	35.6
YLR133W CKI1 Choline kinase, catalyzes the first step in the CDP-choline pathway phosphatidylcholine synthesis (Kennedy pathway); mRNA expression is regulated by inositol and choline, enzyme activity is stimulated by phosphorylation by protein kinase	72.9	65.4	110.1	134.5
YMR091C NPL6 Nuclear protein that may have a role in nuclear protein import	50.1	48.7	36.5	48.3
YCL011C GBP2 Poly(A+) RNA-binding protein, involved in the export of mRNAs from the nucleus to the cytoplasm; similar to Hrb1p and Npl3p; also binds single-stranded telomeric repeat sequence in vitro	183.1	196.3	25.1	36.6
YDL087C LUC7 Essential protein associated with the U1 snRNP complex; splicing factor involved in recognition of 5' splice site	36.6	19.4	77.7	56
YJR094C IME1 Master regulator of meiosis that is active only during meiotic events, activates transcription of early meiotic genes through interaction with Ume6p, degraded by the 26S proteasome following phosphorylation by Ime2p	2409.1	1891	2176.1	2321.4
YCR081W SRB8 Subunit of the RNA polymerase II mediator complex; associates with core polymerase subunits to form the RNA polymerase II holoenzyme; essential for transcriptional regulation; involved in glucose repression	11.8	9.5	6.4	7
YBL097W BRN1 Essential protein required for chromosome condensation, likely to function as an intrinsic component of the condensation machinery, may influence multiple aspects of chromosome transmission and dynamics	28.5	34.3	15.6	25.5
YNR043W MVD1 Mevalonate pyrophosphate decarboxylase, essential enzyme involved in the biosynthesis of isoprenoids and sterols, including ergosterol; acts as a homodimer	147.1	218.7	231.7	467.8
YGL202W ARO8 Aromatic aminotransferase, expression is regulated by general control of amino acid biosynthesis	34.1	44.2	39.1	68.8
YMR144W	41	48.4	26.1	41.8
YOR054C VHS3 Functionally redundant (see also SIS2) inhibitory subunit of Ppz1p, a PP1c-related ser/thr protein phosphatase Z isoform; synthetically lethal with sis2; putative phosphopantothenoylcysteine decarboxylase involved in coenzyme A biosynthesis	55.1	42.3	34.2	35.6
YML087C	15.3	18.7	6.7	11.1
YLR100W ERG27 3-keto sterol reductase, catalyzes the last of three steps required to remove two C-4 methyl groups from an intermediate in ergosterol biosynthesis; mutants are sterol auxotrophs	122.2	140.8	57.5	89.8
YGR167W CLC1 Clathrin light chain, subunit of the major coat protein involved in intracellular protein transport and endocytosis; thought to regulate clathrin function, two Clathrin heavy chains (CHC1) form the clathrin triskelion structural component	179.8	150	218	246.5
YDR457W TOM1 E3 ubiquitin ligase of the hect-domain class; has a role in mRNA export from the nucleus and may regulate transcriptional coactivators	99.8	67.2	98.3	89.7
YJR045C SSC1 Mitochondrial matrix ATPase that is a subunit of the presequence translocase-associated protein import motor (PAM); involved in protein translocation into the matrix and protein folding; member of the heat shock protein 70 (HSP70) family	360.9	174.1	308.2	201.3
YGL216W KIP3 Kinesin-related motor protein involved in mitotic spindle positioning	54.8	70.4	40.9	71.1
YFL054C	16.2	27.4	6.6	15.1
YIL013C PDR11 Membrane protein of the ATP-binding cassette (ABC) transporter superfamily, involved in multiple drug resistance, mediates sterol uptake when sterol biosynthesis is compromised, regulated by Pdr1p, required for anaerobic growth	96.3	91.6	121.9	156.8
YDL095W PMT1 Protein O-mannosyltransferase, transfers mannose residues from dolichyl phosphate-D-mannose to protein serine/threonine residues; acts in a complex with Pmt2p, can instead interact with Pmt3p in some conditions; target for new antifungals	94	111.4	122.9	196.8
YBL064C PRX1 Mitochondrial peroxiredoxin (1-Cys Prx) with thioredoxin peroxidase activity, has a role in reduction of hydroperoxides; induced during respiratory growth and under conditions of oxidative stress	957.6	1359.9	963.3	1848.4
YML005W TRM12 S-adenosylmethionine-dependent methyltransferase of the seven beta-strand family; required for wybutosine formation in phenylalanine-accepting tRNA	19.4	24.8	3.3	5.7
YKR017C	36.3	30.6	10.8	12.3
YGL059W	27.4	44.6	11.1	24.4
YEL027W CUP5 Proteolipid subunit of the vacuolar H(+)-ATPase V0 sector (subunit c; dicyclohexylcarbodiimide binding subunit); required for vacuolar acidification and important for copper and iron metal ion homeostasis	841	632.3	785.8	797.7
YBR150C TBS1 Probable Zn-finger protein	34.5	12.9	10.3	5.2
YOL058W ARG1 Arginosuccinate synthetase, catalyzes the formation of L-argininosuccinate from citrulline and L-aspartate in the arginine biosynthesis pathway; potential Cdc28p substrate	132.7	170.1	150.4	260.3
YDR122W KIN1 Serine/threonine protein kinase involved in regulation of exocytosis; localizes to the cytoplasmic face of the plasma membrane; closely related to Kin2p	48.3	42.2	36.9	43.5
YLR110C CCW12 Cell wall protein, mutants are defective in mating and agglutination, expression is downregulated by alpha-factor	1189.1	1267.7	212.4	305.5
YDR481C PHO8 Repressible alkaline phosphatase, a glycoprotein localized to the vacuole; regulated by levels of inorganic phosphate and by a system consisting of Pho4p, Pho9p, Pho80p, Pho81p and Pho85p; dephosphorylates phosphotyrosyl peptides	197.4	209.9	206.5	296.2
YLL045C RPL8B Ribosomal protein L4 of the large (60S) ribosomal subunit, nearly identical to Rpl8Ap and has similarity to rat L7a ribosomal protein; mutation results in decreased amounts of free 60S subunits	190.7	441.5	58.1	181.4
YMR149W SWP1 Delta subunit of the oligosaccharyl transferase glycoprotein complex, which is required for N-linked glycosylation of proteins in the endoplasmic reticulum	119	149.2	104.1	176
YEL041W	91.4	89.2	30.7	40.4
YNR060W FRE4 Ferric reductase, reduces a specific subset of siderophore-bound iron prior to uptake by transporters; expression induced by low iron levels	7.1	6.9	2.9	3.8
YEL007W	62.1	68.8	56.1	83.8
YNL246W VPS75 Protein of unknown function involved in vacuolar protein sorting; detected in the nucleus	39.7	77.3	33.8	88.7
YKL002W DID4 Class E Vps protein of the ESCRT-III complex, required for sorting of integral membrane proteins into lumenal vesicles of multivesicular bodies, and for delivery of newly synthesized vacuolar enzymes to the vacuole, involved in endocytosis	213.7	207.7	119.4	156.4
YKL185W ASH1 Zinc-finger inhibitor of HO transcription; mRNA is localized and translated in the distal tip of anaphase cells, resulting in accumulation of Ash1p in daughter cell nuclei and inhibition of HO expression; potential Cdc28p substrate	11.4	27.3	2.2	7.1
YMR250W GAD1 Glutamate decarboxylase, converts glutamate into gamma-aminobutyric acid (GABA) during glutamate catabolism; involved in response to oxidative stress	101.4	132.6	33.6	59.2
YCL047C	19.1	16.4	15.3	17.7
YJL184W GON7 Protein of unknown function, proposed to be involved in the transfer of mannosylphosphate groups onto N-linked oligosaccharides; also proposed to be involved in responding to osmotic stress	66.7	73.7	62	92.3
YJR121W ATP2 Beta subunit of the F1 sector of mitochondrial F1F0 ATP synthase, which is a large, evolutionarily conserved enzyme complex required for ATP synthesis	576.3	622.2	790.6	1149.9
YDL131W;YDL182W	89.1	124	168.9	316.5
YBR136W MEC1 Genome integrity checkpoint protein and PI kinase superfamily member; signal transducer required for cell cycle arrest and transcriptional responses prompted by damaged or unreplicated DNA; monitors and participates in meiotic recombination	19.5	20	11.3	15.6
YDR055W PST1 Cell wall protein that contains a putative GPI-attachment site; secreted by regenerating protoplasts; up-regulated by activation of the cell integrity pathway, as mediated by Rlm1p; upregulated by cell wall damage via disruption of FKS1	126.2	154.7	23.7	39.1
YNL322C KRE1 Cell wall glycoprotein involved in beta-glucan assembly; serves as a K1 killer toxin membrane receptor	184.6	133.7	287.4	280.1
YLR298C YHC1 Component of the U1 snRNP complex required for pre-mRNA splicing; putative ortholog of human U1C protein, which is involved in formation of a complex between U1 snRNP and the pre-mRNA 5' splice site	68.5	70.7	34.8	48.3
YOR182C RPS30B Protein component of the small (40S) ribosomal subunit; nearly identical to Rps30Ap and has similarity to rat S30 ribosomal protein	540.8	1202.9	176.3	527.1
YNR075W COS10 Protein of unknown function, member of a family of conserved, often subtelomerically-encoded proteins	7.2	5	1.5	1.4
YGR060W ERG25 C-4 methyl sterol oxidase, catalyzes the first of three steps required to remove two C-4 methyl groups from an intermediate in ergosterol biosynthesis; mutants accumulate the sterol intermediate 4,4-dimethylzymosterol	1513.1	1516.1	1942.2	2615.2
YER023W PRO3 Delta 1-pyrroline-5-carboxylate reductase, catalyzes the last step in proline biosynthesis	281.9	394.5	428.5	805.7
YNL020C ARK1 Serine/threonine protein kinase involved in regulation of the cortical actin cytoskeleton; involved in control of endocytosis	45	11.6	30.9	10.7
YNL295W	19.7	16.1	9.2	10.1
YER169W RPH1 Transcriptional repressor of PHR1, which is a photolyase induced by DNA damage; binds to AG(4) (C(4)T) sequence upstream of PHR1; Rph1p phosphorylation during DNA damage is under control of the MEC1-RAD53 pathway	38.3	47.9	20.9	35.1
YOR362C PRE10 20S proteasome alpha-type subunit	415.8	623.9	301.7	607.8
YGL084C GUP1 Plasma membrane protein with a possible role in proton symport of glycerol; member of the MBOAT family of putative membrane-bound O-acyltransferases	105.4	88.9	75.8	85.8
YGL223C COG1 Essential component of the conserved oligomeric Golgi complex (Cog1p through Cog8p), a cytosolic tethering complex that functions in protein trafficking to mediate fusion of transport vesicles to Golgi compartments	38	66.1	7.5	17.5
YBR086C IST2 Plasma membrane protein that may be involved in osmotolerance, localizes to the mother cell in small-budded cells and to the bud in medium- and large-budded cells; mRNA is transported to the bud tip by an actomyosin-driven process	36.4	45.6	10.3	17.3
YER119C AVT6 Vacuolar transporter, exports aspartate and glutamate from the vacuole; member of a family of seven S. cerevisiae genes (AVT1-7) related to vesicular GABA-glycine transporters	24.7	26.3	29.5	42.1
YBL017C PEP1 Type I transmembrane sorting receptor for multiple vacuolar hydrolases; cycles between the late-Golgi and prevacuolar endosome-like compartments	42.1	34.8	36.2	40.1
YGR250C	74.4	85.9	49.9	77.2
YGL206C CHC1 Clathrin heavy chain, subunit of the major coat protein involved in intracellular protein transport and endocytosis; two heavy chains form the clathrin triskelion structural component; the light chain (CLC1) is thought to regulate function	59.6	52.6	204.6	241.8
YBR163W DEM1 Protein of unknown function, shows similarity to RNA-processing protein Pta1p	34	29.7	5.9	6.9
YMR278W	74.9	79.2	49.1	69.5
YKR028W SAP190 Protein that forms a complex with the Sit4p protein phosphatase and is required for its function; member of a family of similar proteins including Sap4p, Sap155p, and Sap185p	40.6	53.6	16.3	28.8
YOR305W	41.8	63	6	12.1
YGR131W	49.7	71.2	14.3	27.4
YML085C TUB1 Alpha-tubulin; associates with beta-tubulin (Tub2p) to form tubulin dimer, which polymerizes to form microtubules	515.2	485.5	673.9	849.2
YNR052C POP2 RNase of the DEDD superfamily, subunit of the Ccr4-Not complex that mediates 3' to 5' mRNA deadenylation	45.4	46.4	45	61.5
YGL064C MRH4 Mitochondrial RNA helicase, plays an essential role in mitochondrial function	6.7	10.6	5.2	11
YPL190C NAB3 Single stranded DNA binding protein; acidic ribonucleoprotein; required for termination of non-poly(A) transcripts and efficient splicing; interacts with Nrd1p	120.3	90.5	171	172
YGL140C	38.7	45.2	9.8	15.3
YJR123W RPS5 Protein component of the small (40S) ribosomal subunit, the least basic of the non-acidic ribosomal proteins; phosphorylated in vivo; essential for viability; has similarity to E. coli S7 and rat S5 ribosomal proteins	350.3	726.3	125.8	348.5
YPL076W GPI2 Protein involved in the synthesis of N-acetylglucosaminyl phosphatidylinositol (GlcNAc-PI), the first intermediate in the synthesis of glycosylphosphatidylinositol (GPI) anchors; homologous to the human PIG-C protein	14.4	27.7	7.2	18.5
YCL038C ATG22 Protein required for the breakdown of autophagic vesicles in the vacuole during autophagy, putative integral membrane protein that localizes to vacuolar membranes and punctate structures attached to the vacuole	81.5	86.3	54.9	77.6
YPR098C	112.4	189.5	66.7	150.1
YHR045W	62.4	97.5	34.1	71.1
YIL095W PRK1 Protein serine/threonine kinase; regulates the organization and function of the actin cytoskeleton through the phosphorylation of the Pan1p-Sla1p-End3p protein complex	21.2	12.9	15.9	12.9
YJL035C TAD2 Subunit of tRNA-specific adenosine-34 deaminase, forms a heterodimer with Tad3p that converts adenosine to inosine at the wobble position of several tRNAs	14.3	8.3	8.4	6.5
YOR109W INP53 Phosphatidylinositol 4,5-bisphosphate 5-phosphatase, synaptojanin-like protein with an N-terminal Sac1 domain, plays a role in a TGN (trans Golgi network)-to-early endosome pathway; hyperosmotic stress causes translocation to actin patches	28.8	27.9	37.4	48.3
YPL252C YAH1 Ferredoxin of the mitochondrial matrix required for formation of cellular iron-sulfur proteins; involved in heme A biosynthesis; homologous to human adrenodoxin	15.6	14.5	24.3	30.1
YNR051C BRE5 Ubiquitin protease cofactor, forms deubiquitination complex with Ubp3p that coregulates anterograde and retrograde transport between the endoplasmic reticulum and Golgi compartments; null is sensitive to brefeldin A	125.6	179.9	25.2	48.1
YDL105W NSE4 Nuclear protein that plays a role in the function of the Smc5p-Rhc18p complex	20.1	32.4	8.8	18.9
YDR329C PEX3 Peroxisomal membrane protein (PMP) required to recruit Pex19p chaperone to peroxisomes; plays selective, essential, direct role in PMP import as a docking factor for Pex19p	89.4	75.9	45.8	51.8
YHR147C MRPL6 Mitochondrial ribosomal protein of the large subunit	18.1	27.8	13.2	27
YLR295C ATP14 Subunit h of the F0 sector of mitochondrial F1F0 ATP synthase, which is a large, evolutionarily conserved enzyme complex required for ATP synthesis	389.6	385.7	596.1	785.5
YNR016C ACC1 Acetyl-CoA carboxylase, biotin containing enzyme that catalyzes the carboxylation of acetyl-CoA to form malonyl-CoA; required for de novo biosynthesis of long-chain fatty acids	142	176.2	143.4	236.8
YDL195W SEC31 Essential phosphoprotein component (p150) of the COPII coat of secretory pathway vesicles, in complex with Sec13p; required for ER-derived transport vesicle formation	47	54.1	93.9	143.8
YBR212W NGR1 RNA binding protein that negatively regulates growth rate; interacts with the 3' UTR of the mitochondrial porin (POR1) mRNA and enhances its degradation; overexpression impairs mitochondrial function; expressed in stationary phase	102.4	63.9	63.6	52.8
YJR033C RAV1 Subunit of the RAVE complex (Rav1p, Rav2p, Skp1p), which promotes assembly of the V-ATPase holoenzyme; required for transport between the early and late endosome/PVC and for localization of TGN membrane proteins; potential Cdc28p substrate	12.8	12.1	10.5	13.2
YOL017W ESC8 Protein involved in telomeric and mating-type locus silencing, interacts with Sir2p and also interacts with the Gal11p, which is a component of the RNA pol II mediator complex	32.2	38.1	21.8	34.3
YDR036C EHD3 Protein of unconfirmed function, plays an indirect role in endocytic membrane trafficking, member of a family of enoyl-CoA hydratase/isomerases	86.6	74.4	75.2	85.9
YAL005C;YLL024C	2323.6	2455.6	3901.9	5482.5
YLR087C CSF1 Protein required for fermentation at low temperature	20.2	19.3	11.1	14.1
YNL272C SEC2 Guanyl-nucleotide exchange factor for the small G-protein Sec4p, located on cytoplasmic vesicles; essential for post-Golgi vesicle transport	76.6	64.7	41.5	46.6
YOR267C HRK1 Protein kinase implicated in activation of the plasma membrane H(+)-ATPase Pma1p in response to glucose metabolism; plays a role in ion homeostasis	106.8	68.3	72	61.2
YOR198C BFR1 Component of mRNP complexes associated with polyribosomes; implicated in secretion and nuclear segregation; multicopy suppressor of BFA (Brefeldin A) sensitivity	191	209.7	205.2	299.4
YPR184W GDB1 Glycogen debranching enzyme containing glucanotranferase and alpha-1,6-amyloglucosidase activities, required for glycogen degradation	204.3	143.9	375.1	351.1
YMR073C	64.6	98.2	45.2	91.3
YPL053C KTR6 Probable mannosylphosphate transferase involved in the synthesis of core oligosaccharides in protein glycosylation pathway; member of the KRE2/MNT1 mannosyltransferase family	60.6	84.1	26.9	49.6
YKR070W	52.2	86.2	41.4	90.8
YMR220W ERG8 Phosphomevalonate kinase, an essential cytosolic enzyme that acts in the biosynthesis of isoprenoids and sterols, including ergosterol, from mevalonate	71.9	132.8	35	85.8
YGL241W KAP114 Karyopherin, responsible for nuclear import of Spt15p, histones H2A and H2B, and Nap1p; amino terminus shows similarity to those of other importins, particularly Cse1p; localization is primarily nuclear	15.2	22.2	9.6	18.6
YKR041W	26.9	18.3	32.8	29.6
YNL297C MON2 Peripheral membrane protein with a role in endocytosis and vacuole integrity, interacts with Arl1p and localizes to the endosome; member of the Sec7p family of proteins	29.1	25.2	17.5	20.1
YGR051C	4.2	1.9	1.5	0.9
YOR336W KRE5 Protein required for beta-1,6 glucan biosynthesis; mutations result in aberrant morphology and severe growth defects	24.7	25.6	34	46.7
YMR295C	340.9	222.1	205.7	177.6
YGL213C SKI8 Protein involved in exosome mediated 3' to 5' mRNA degradation and translation inhibition of non-poly(A) mRNAs as well as double-strand break formation during meiotic recombination; required for repressing propagation of dsRNA viruses	116.6	151.7	94.9	163.6
YER099C PRS2 5-phospho-ribosyl-1(alpha)-pyrophosphate synthetase, involved in nucleotide, histidine, and tryptophan biosynthesis; one of a five related enzymes, which are active as heteromultimeric complexes	94.4	145.3	40.7	83
YPL157W TGS1 Trimethyl guanosine synthase, conserved nucleolar methyl transferase responsible for conversion of the m(7)G cap structure of snRNAs and snoRNAs to m(2,2,7)G; also required for ribosome synthesis and nucleolar morphology	8.5	22	4.9	16.8
YJR097W JJJ3 Protein of unknown function, contains a J-domain, which is a region with homology to the E. coli DnaJ protein	12.1	28.2	2.3	7.1
YDR085C AFR1 Alpha-factor pheromone receptor regulator, negatively regulates pheromone receptor signaling; required for normal mating projection (shmoo) formation; interacts with Cdc12p	155.2	193.7	117.9	194.9
YGR256W GND2 6-phosphogluconate dehydrogenase (decarboxylating), catalyzes an NADPH regenerating reaction in the pentose phosphate pathway; required for growth on D-glucono-delta-lactone	50.1	132.4	29.6	103.6
YBR101C FES1 Hsp70 (Ssa1p) nucleotide exchange factor, cytosolic homolog of Sil1p, which is the nucleotide exchange factor for BiP (Kar2p) in the endoplasmic reticulum	195.1	261.1	117.9	208.9
YER157W COG3 Essential component of the conserved oligomeric Golgi complex (Cog1p through Cog8p), a cytosolic tethering complex that functions in protein trafficking to mediate fusion of transport vesicles to Golgi compartments	22	28.6	12.9	22.2
YOR185C GSP2 GTP binding protein (mammalian Ranp homolog) involved in the maintenance of nuclear organization, RNA processing and transport; interacts with Kap121p, Kap123p and Pdr6p (karyophilin betas); Gsp1p homolog that is not required for viability	281.6	299.3	497.2	699.4
YPL203W TPK2 Subunit of cytoplasmic cAMP-dependent protein kinase, which contains redundant catalytic subunits Tpk1p, Tpk2p, and Tpk3p and regulatory subunit Bcy1p; promotes vegetative growth in response to nutrients; activates filamentous growth	143.1	145	101	135.4
YBR003W COQ1 Hexaprenyl pyrophosphate synthetase, catalyzes the first step in ubiquinone (coenzyme Q) biosynthesis	24.3	29.6	18	29
YPL116W HOS3 Trichostatin A-insensitive homodimeric histone deacetylase (HDAC) with specificity in vitro for histones H3, H4, H2A, and H2B; similar to Hda1p, Rpd3p, Hos1p, and Hos2p; deletion results in increased histone acetylation at rDNA repeats	38.2	41.5	21.3	30.6
YBL015W ACH1 Acetyl-coA hydrolase, primarily localized to mitochondria; required for acetate utilization and for diploid pseudohyphal growth	1362.1	1011.5	2452.3	2407.5
YPL172C COX10 Heme A:farnesyltransferase, catalyzes the first step in the conversion of protoheme to the heme A prosthetic group required for cytochrome c oxidase activity; human ortholog is associated with mitochondrial disorders	7.4	15.3	4.5	12.3
YJL183W MNN11 Subunit of a Golgi mannosyltransferase complex that also contains Anp1p, Mnn9p, Mnn10p, and Hoc1p, and mediates elongation of the polysaccharide mannan backbone; has homology to Mnn10p	64.4	119.5	30.9	75.8
YMR110C	311.7	382.1	275.1	445.8
YMR118C	28.2	49.1	9	20.7
YKR072C SIS2 Negative regulatory subunit of the protein phosphatase 1 Ppz1p; involved in ion homeostasis and cell cycle progression	44.3	53	47.4	74.9
YKR048C NAP1 Protein that interacts with mitotic cyclin Clb2p; required for the regulation of microtubule dynamics during mitosis; controls bud morphogenesis; involved in the transport of H2A and H2B histones to the nucleus	211.7	194.4	210.8	255.6
YHR068W DYS1 Deoxyhypusine synthase, catalyzes formation of deoxyhypusine, the first step in hypusine biosynthesis; triggers posttranslational hypusination of translation elongation factor eIF-5A and regulates its intracellular levels; tetrameric	34.7	68.2	19.5	50.6
YHR165C PRP8 Component of the U4/U6-U5 snRNP complex, involved in the second catalytic step of splicing	32.1	28.5	9.3	10.9
YBR022W POA1 Phosphatase that is highly specific for ADP-ribose 1''-phosphate, a tRNA splicing metabolite; may have a role in regulation of tRNA splicing	35.4	43	20.4	32.7
YBR071W	297.8	83.6	459.8	170.3
YLL019C;YLL020C	675.3	444.8	62.5	54.3
YDR497C ITR1 Myo-inositol transporter with strong similarity to the minor myo-inositol transporter Itr2p, member of the sugar transporter superfamily; expression is repressed by inositol and choline via Opi1p and derepressed via Ino2p and Ino4p	107.7	257.3	42.5	133.9
YMR140W SIP5 Protein of unknown function; interacts with both the Reg1p/Glc7p phosphatase and the Snf1p kinase	65.4	49.7	52	52.1
YER014W HEM14 Protoporphyrinogen oxidase, a mitochondrial enzyme that catalyzes the seventh step in the heme biosynthetic pathway, converting protoporphyrinogen IX to protoporphyrin IX	83.7	89.5	62.3	87.8
YIR033W MGA2 ER membrane protein involved, with its homolog Spt23p, in regulation of OLE1 transcription; inactive ER form dimerizes and one subunit is then activated by ubiquitin/proteasome-dependent processing followed by nuclear targeting	100.5	126.5	96.4	159.9
YGR221C TOS2 Protein involved in localization of Cdc24p to the site of bud growth; may act as a membrane anchor; localizes to the bud neck and bud tip; potentially phosphorylated by Cdc28p	4.6	4.8	3.2	4.4
YNL176C	38.8	50.2	24.7	42.1
YHR117W TOM71 Mitochondrial outer membrane protein with similarity to Tom70p; probable minor component of the TOM (translocase of outer membrane) complex responsible for recognition and import of mitochondrially directed proteins	16.4	25.5	8.3	17
YLL034C RIX7 Putative ATPase of the AAA family, required for export of pre-ribosomal large subunits from the nucleus; distributed between the nucleolus, nucleoplasm, and nuclear periphery depending on growth conditions	11.8	29.5	4.8	15.8
YOR126C IAH1 Isoamyl acetate-hydrolyzing esterase, required in balance with alcohol acetyltransferase to maintain optimal amounts of isoamyl acetate, which is particularly important in sake brewing	30.1	43.1	23.3	43.9
YML025C YML6 Mitochondrial ribosomal protein of the large subunit, has similarity to E. coli L4 ribosomal protein and human mitoribosomal MRP-L4 protein; essential for viability, unlike most other mitoribosomal proteins	116.1	46.2	99.7	52.2
YOR161C PNS1 Protein of unknown function; has similarity to Torpedo californica tCTL1p, which is postulated to be a choline transporter, neither null mutation nor overexpression affects choline transport	181.5	147.3	105.4	112.5
YBL040C ERD2 Integral membrane protein that binds to the HDEL motif in proteins destined for retention in the endoplasmic reticulum; has a role in maintenance of normal levels of ER-resident proteins	153.9	197.4	91.2	153.8
YIL084C SDS3 Component of the Rpd3p/Sin3p deacetylase complex required for its structural integrity and catalytic activity, involved in transcriptional silencing and required for sporulation; cells defective in SDS3 display pleiotropic phenotypes	21	26.9	23.4	39.4
YLR344W RPL26A Protein component of the large (60S) ribosomal subunit, nearly identical to Rpl26Bp and has similarity to E. coli L24 and rat L26 ribosomal proteins; binds to 5.8S rRNA	176.7	414	74.4	229.1
YJR056C	89.8	167.3	56.2	137.6
YKR021W	17.6	19.6	8.2	12
YJL034W KAR2 ATPase involved in protein import into the ER, also acts as a chaperone to mediate protein folding in the ER and may play a role in ER export of soluble proteins; regulates the unfolded protein response via interaction with Ire1p	1000	693.8	1475.4	1344.3
YER021W RPN3 Essential, non-ATPase regulatory subunit of the 26S proteasome lid, similar to the p58 subunit of the human 26S proteasome; temperature-sensitive alleles cause metaphase arrest, suggesting a role for the proteasome in cell cycle control	519.9	743.8	337.6	634.2
YBR109C CMD1 Calmodulin; Ca++ binding protein that regulates Ca++ independent processes (mitosis, bud growth, actin organization, endocytosis, etc.) and Ca++ dependent processes (stress-activated pathways), targets include Nuf1p, Myo2p and calcineurin	413	419.4	401.9	535.8
YGL020C GET1 Subunit of the GET complex; required for the retrieval of HDEL proteins from the Golgi to the ER in an ERD2 dependent fashion and for normal mitochondrial morphology and inheritance	54.6	91.9	29.1	64.3
YMR115W FMP24 The authentic, non-tagged protein was localized to the mitochondria	206.2	161	130.2	133.4
YDR391C	115.2	172.8	91.2	179.3
YGL133W ITC1 Component of the ATP-dependent Isw2p-Itc1p chromatin remodeling complex, required for repression of a-specific genes, repression of early meiotic genes during mitotic growth, and repression of INO1	25.9	35.2	6.4	11.4
YDR077W SED1 Major stress-induced structural GPI-cell wall glycoprotein in stationary-phase cells, associates with translating ribosomes, possible role in mitochondrial genome maintenance; ORF contains two distinct variable minisatellites	2948.8	2463	3294.1	3605.5
YOR028C CIN5 Basic leucine zipper transcriptional factor of the yAP-1 family that mediates pleiotropic drug resistance and salt tolerance; localizes constitutively to the nucleus	347.2	399.9	102.3	154.4
YJL105W SET4 Protein of unknown function, contains a SET domain	12.8	21.4	4.2	9.2
YHR189W PTH1 One of two (see also PTH2) mitochondrially-localized peptidyl-tRNA hydrolases; dispensable for cell growth and for mitochondrial respiration	15.7	18.6	16.5	25.6
YBL007C SLA1 Cytoskeletal protein binding protein required for assembly of the cortical actin cytoskeleton; contains 3 SH3 domains; interacts with proteins regulating actin dynamics and with proteins required for endocytosis	58.6	40.6	115.4	104.7
YOR160W MTR10 Nuclear import receptor, mediates the nuclear localization of proteins involved in mRNA-nucleus export	16.8	26	11.5	23.3
YPL011C TAF3 TFIID subunit (47 kDa), involved in promoter binding and RNA polymerase II transcription initiation	41.5	72.2	19.2	43.7
YGL038C OCH1 Mannosyltransferase of the cis-Golgi apparatus, initiates the polymannose outer chain elongation of N-linked oligosaccharides of glycoproteins	50.4	57	37.6	55.6
YOR141C ARP8 Nuclear actin-related protein involved in chromatin remodeling, component of chromatin-remodeling enzyme complexes	36.5	41.1	32.4	47.7
YMR302C PRP12 Integral inner mitochondrial membrane protein with similarity to exonucleases; prp12 mutants exhibit an increased rate of mt DNA escape	92.6	106.9	64.7	97.6
YHR208W BAT1 Mitochondrial branched-chain amino acid aminotransferase, homolog of murine ECA39; highly expressed during logarithmic phase and repressed during stationary phase	32.7	63.3	24.4	61.7
YCL051W LRE1 Protein involved in control of cell wall structure and stress response; inhibits Cbk1p protein kinase activity; overproduction confers resistance to cell-wall degrading enzymes	30.2	33.3	10.9	15.7
YLR028C ADE16 Enzyme of 'de novo' purine biosynthesis containing both 5-aminoimidazole-4-carboxamide ribonucleotide transformylase and inosine monophosphate cyclohydrolase activities, isozyme of Ade17p; ade16 ade17 mutants require adenine and histidine	96.1	157.4	79.6	170.3
YDR054C CDC34 Ubiquitin-conjugating enzyme or E2; together with Skp1p, Rbx1p, Cdc53p, and an F-box protein, forms a ubiquitin-protein ligase called the SCF complex which regulates cell cycle progression by targeting key substrates for degradation	357.4	308.8	350.2	395.2
YPR097W	91.5	103.4	59.9	88.4
YDL198C GGC1 Mitochondrial GTP/GDP transporter, essential for mitochondrial genome maintenance; has a role in mitochondrial iron transport; member of the mitochondrial carrier family; (putative) mitochondrial carrier protein	54.3	67.9	48.5	79.2
YHR064C SSZ1 Hsp70 protein that interacts with Zuo1p (a DnaJ homolog) to form a ribosome-associated complex that is bound to the ribosome via the Zuo1p subunit; also involved in pleiotropic drug resistance via sequential activation of PDR1 and PDR5	44.4	72.8	30.5	65.3
YJL193W	10.4	23.1	4	11.6
YOL096C COQ3 O-methyltransferase, catalyzes two different O-methylation steps in ubiquinone (Coenzyme Q) biosynthesis; component of a mitochondrial ubiquinone-synthesizing complex	53.1	43.3	26.3	28
YER173W RAD24 Checkpoint protein, involved in the activation of the DNA damage and meiotic pachytene checkpoints; subunit of a clamp loader that loads Rad17p-Mec3p-Ddc1p onto DNA; homolog of human and S. pombe Rad17 protein	12.9	21.1	3.7	7.9
YGR125W	42.6	60.6	18.8	34.9
YJR001W AVT1 Vacuolar transporter, imports large neutral amino acids into the vacuole; member of a family of seven S. cerevisiae genes (AVT1-7) related to vesicular GABA-glycine transporters	66	95.4	54.2	102.2
YAL062W GDH3 NADP(+)-dependent glutamate dehydrogenase, synthesizes glutamate from ammonia and alpha-ketoglutarate; rate of alpha-ketoglutarate utilization differs from Gdh1p; expression regulated by nitrogen and carbon sources	51.6	147.5	53.7	200.2
YMR033W ARP9 Actin-related protein involved in transcriptional regulation; subunit of the chromatin remodeling Snf/Swi complex	22.3	42.1	13	32
YBR004C GPI18 Functional ortholog of human PIG-V, which is a mannosyltransferase that transfers the second mannose in glycosylphosphatidylinositol biosynthesis; the authentic, non-tagged protein was localized to mitochondria	120.7	45	46.3	22.5
YOL069W NUF2 Component of the evolutionarily conserved kinetochore-associated Ndc80 complex (Ndc80p-Nuf2p-Spc24p-Spc25p); involved in chromosome segregation, spindle checkpoint activity and kinetochore clustering	33.1	42.6	20.7	34.7
YCR069W CPR4 Peptidyl-prolyl cis-trans isomerase (cyclophilin), catalyzes the cis-trans isomerization of peptide bonds N-terminal to proline residues; has a potential role in the secretory pathway	66.7	110.9	29.6	64.1
YPL104W MSD1 Mitochondrial aspartyl-tRNA synthetase, required for acylation of aspartyl-tRNA; yeast and bacterial aspartyl-, asparaginyl-, and lysyl-tRNA synthetases contain regions with high sequence similarity, suggesting a common ancestral gene	6.6	13	2.3	5.9
YKL182W FAS1 Beta subunit of fatty acid synthetase, which catalyzes the synthesis of long-chain saturated fatty acids; contains acetyltransacylase, dehydratase, enoyl reductase, malonyl transacylase, and palmitoyl transacylase activities	189.2	228.6	98.4	154.8
YHR017W YSC83 Non-essential mitochondrial protein of unknown function; mRNA induced during meiosis, peaking between mid to late prophase of meiosis I; similar to S. douglasii YSD83	97	146.1	59	115.7
YIL005W EPS1 Pdi1p (protein disulfide isomerase)-related protein involved in endoplasmic reticulum retention of resident ER proteins	84.4	76.3	96.6	113.7
YPR102C RPL11A Protein component of the large (60S) ribosomal subunit, nearly identical to Rpl11Bp; involved in ribosomal assembly; depletion causes degradation of proteins and RNA of the 60S subunit; has similarity to E. coli L5 and rat L11	114.7	315.4	55.2	197.6
YBL103C RTG3 Basic helix-loop-helix-leucine zipper (bHLH/Zip) transcription factor that forms a complex with another bHLH/Zip protein, Rtg1p, to activate the retrograde (RTG) and TOR pathways	60.6	58.3	32.5	40.7
YBR127C VMA2 Subunit B of the eight-subunit V1 peripheral membrane domain of the vacuolar H+-ATPase (V-ATPase), an electrogenic proton pump found throughout the endomembrane system; contains nucleotide binding sites; also detected in the cytoplasm	131.5	193.3	175.3	335.4
YDL125C HNT1 Adenosine 5'-monophosphoramidase; interacts physically and genetically with Kin28p, a CDK and TFIIK subunit, and genetically with CAK1; member of the histidine triad (HIT) superfamily of nucleotide-binding proteins and similar to Hint	552.6	665.6	479.7	751.7
YHR099W TRA1 Subunit of SAGA and NuA4 histone acetyltransferase complexes; interacts with acidic activators (e.g., Gal4p) which leads to transcription activation; similar to human TRRAP, which is a cofactor for c-Myc mediated oncogenic transformation	117.5	82.2	10	9.1
YGR102C	58.7	71.5	25.9	41
YDR170C SEC7 Guanine nucleotide exchange factor (GEF) for ADP ribosylation factors involved in proliferation of the Golgi, intra-Golgi transport and ER-to-Golgi transport; found in the cytoplasm and on Golgi-associated coated vesicles	42.6	39.5	40.5	48.8
YIL051C MMF1 Mitochondrial protein involved in maintenance of the mitochondrial genome	108	229	247.2	680.8
YGR244C LSC2 Beta subunit of succinyl-CoA ligase, which is a mitochondrial enzyme of the TCA cycle that catalyzes the nucleotide-dependent conversion of succinyl-CoA to succinate	1151.9	1038.4	1299.2	1521
YDR188W CCT6 Subunit of the cytosolic chaperonin Cct ring complex, related to Tcp1p, essential protein that is required for the assembly of actin and tubulins in vivo; contains an ATP-binding motif	85.1	135.7	64.4	133.3
YOR173W DCS2 Non-essential protein containing a HIT (histidine triad) motif; regulated by Msn2p, Msn4p, and the Ras-cAMP-cAPK signaling pathway, transcript accumulates under glucose limitation, similar to Dcs1p	182.8	163.7	72.7	84.5
YLR411W CTR3 High-affinity copper transporter of the plasma membrane, acts as a trimer; gene is disrupted by a Ty2 transposon insertion in many laboratory strains of S. cerevisiae	473.2	2610.5	348.8	2496.7
YNL005C MRP7 Mitochondrial ribosomal protein of the large subunit	54.3	67.2	23	36.9
YBL101C ECM21 Non-essential protein of unknown function; promoter contains several Gcn4p binding elements	120	79.6	174.5	150
YEL023C	1222.7	278.7	81.6	24.1
YGL071W RCS1 Transcription factor involved in iron utilization and homeostasis; binds the consensus site PyPuCACCCPu and activates the expression of target genes in response to changes in iron availability	20.4	10.8	3.5	2.4
YLR370C ARC18 Subunit of the ARP2/3 complex, which is required for the motility and integrity of cortical actin patches	171.8	142.3	148.2	158.9
YKL212W SAC1 Lipid phosphoinositide phosphatase of the ER and Golgi, involved in protein trafficking and secretion	43.2	71.5	26.1	55.9
YDL019C OSH2 Member of an oxysterol-binding protein family with seven members in S. cerevisiae; family members have overlapping, redundant functions in sterol metabolism and collectively perform a function essential for viability	56.4	48.2	29.3	32.4
YDR518W EUG1 Protein disulfide isomerase of the endoplasmic reticulum lumen, function overlaps with that of Pdi1p; may interact with nascent polypeptides in the ER	47.1	72	40	79.1
YDR155C CPR1 Cytoplasmic peptidyl-prolyl cis-trans isomerase (cyclophilin), catalyzes the cis-trans isomerization of peptide bonds N-terminal to proline residues; binds the drug cyclosporin A	590.1	662	1555.7	2256.8
YNL218W MGS1 Protein with DNA-dependent ATPase and ssDNA annealing activities involved in maintenance of genome; interacts functionally with DNA polymerase delta; homolog of human Werner helicase interacting protein (WHIP)	29.8	24.4	18.8	19.9
YML120C NDI1 NADH:ubiquinone oxidoreductase, transfers electrons from NADH to ubiquinone in the respiratory chain but does not pump protons, in contrast to the higher eukaryotic multisubunit respiratory complex I which is absent in S. cerevisiae	178.2	125.6	207	188.6
YML126C ERG13 3-hydroxy-3-methylglutaryl-CoA (HMG-CoA) synthase, catalyzes the formation of HMG-CoA from acetyl-CoA and acetoacetyl-CoA; involved in the second step in mevalonate biosynthesis	460.6	508.1	683.5	974.3
YDR032C PST2 Protein of unknown function with similarity to members of a family of flavodoxin-like proteins; induced by oxidative stress in a Yap1p dependent manner; GFP-fusion protein localizes to the cytoplasm in a punctate pattern	253.2	316.8	247.8	400.6
YLR272C YCS4 Non-SMC subunit of the condensin complex (Smc2p-Smc4p-Ycs4p-Brn1p-Ycg1p); required for establishment and maintenance of chromosome condensation, chromosome segregation, chromatin binding of condensin and silencing at the mating type locus	14.3	23.7	6.4	13.7
YJL210W PEX2 RING-finger peroxin, peroxisomal membrane protein with a C-terminal zinc-binding RING domain, forms putative translocation subcomplex with Pex10p and Pex12p which functions in peroxisomal matrix protein import	88.9	96.3	22.3	31.2
YNL008C ASI3 Putative integral membrane E3 ubiquitin ligase; genetic interactions suggest a role in negative regulation of amino acid uptake	34	47.1	12.3	22
YNL151C RPC31 RNA polymerase III subunit C31; contains HMG-like C-terminal domain	25	58.8	11.2	34
YGL228W SHE10 Putative glycosylphosphatidylinositol (GPI)-anchored protein of unknown function; overexpression causes growth arrest	312.3	251.4	382.5	397.3
YJR003C	12.7	18.2	5.3	9.8
YCL033C	127	157.8	88.1	141.2
YLR167W RPS31 Fusion protein that is cleaved to yield a ribosomal protein of the small (40S) subunit and ubiquitin; ubiquitin may facilitate assembly of the ribosomal protein into ribosomes; interacts genetically with translation factor eIF2B	613	1664.3	195.5	684.6
YLR431C ATG23 Peripheral membrane protein, required for autophagy and for the cytoplasm-to-vacuole targeting (Cvt) pathway	74.2	101.7	48.2	85.2
YNL044W YIP3 Protein localized to COPII vesicles, proposed to be involved in ER to Golgi transport; interacts with members of the Rab GTPase family and Yip1p	496.3	376.6	376.1	368
YER151C UBP3 Ubiquitin-specific protease that interacts with Bre5p to co-regulate anterograde and retrograde transport between endoplasmic reticulum and Golgi compartments; inhibitor of gene silencing; cleaves ubiquitin fusions but not polyubiquitin	33.3	42.6	27.1	44.7
YJL051W	26.5	18.4	12.4	11.1
YPL186C UIP4 Protein of unknown function that interacts with Ulp1p, a Ubl (ubiquitin-like protein)-specific protease for Smt3p protein conjugates	196.5	363.9	123.9	295.8
YBR227C MCX1 Mitochondrial ATP-binding protein, possibly a mitochondrial chaperone with non-proteolytic function; similar to bacterial ClpX proteins	21	42.4	18.6	48.4
YIR016W	153.8	156.7	66.8	87.7
YCL066W;YCR040W	13.2	16	23	35.9
YBR146W MRPS9 Mitochondrial ribosomal protein of the small subunit	77.9	61.8	83.6	85.4
YOL148C SPT20 Subunit of the SAGA transcriptional regulatory complex, involved in maintaining the integrity of the complex	21.8	31.6	10.4	19.4
YEL040W UTR2 Putative glycosidase, glycosylphosphatidylinositol (GPI)-anchored protein localized to the bud neck; has a role in cell wall maintenance	56.9	87.2	35.9	70.8
YPL216W	13.9	27.5	5.5	14
YBR047W FMP23 The authentic, non-tagged protein was localized to the mitochondria	44.3	62.1	19.3	34.8
YDL022W GPD1 NAD-dependent glycerol-3-phosphate dehydrogenase, key enzyme of glycerol synthesis, essential for growth under osmotic stress; expression regulated by high-osmolarity glycerol response pathway; homolog of Gpd2p	527.5	395.3	817.4	787.6
YPR040W TIP41 Protein that interacts physically and genetically with Tap42p, which regulates protein phosphatase 2A; component of the TOR (target of rapamycin) signaling pathway	55	45.5	75.5	80.3
YNL094W APP1 Protein of unknown function, interacts with Rvs161p and Rvs167p; computational analysis of protein-protein interactions in large-scale studies suggests a possible role in actin filament organization	51.2	60.7	14.5	22.1
YHR191C CTF8 Subunit of a complex with Ctf18p that shares some subunits with Replication Factor C and is required for sister chromatid cohesion	80.7	60.9	49.5	48
YHR086W NAM8 RNA binding protein, component of the U1 snRNP protein; mutants are defective in meiotic recombination and in formation of viable spores, involved in the formation of DSBs through meiosis-specific splicing of MER2 pre-mRNA	40.8	47.8	37.4	56.3
YFR047C BNA6 Quinolinate phosphoribosyl transferase, required for biosynthesis of nicotinic acid from tryptophan via kynurenine pathway	103.8	125.9	75.3	117.3
YER114C BOI2 Protein implicated in polar growth, functionally redundant with Boi1p; interacts with bud-emergence protein Bem1p; contains an SH3 (src homology 3) domain and a PH (pleckstrin homology) domain	70	80.4	83.8	123.6
YDR477W SNF1 AMP-activated serine/threonine protein kinase found in a complex containing Snf4p and members of the Sip1p/Sip2p/Gal83p family; required for transcription of glucose-repressed genes, thermotolerance, sporulation, and peroxisome biogenesis	47.9	59.8	50.4	80.8
YBR223C TDP1 Tyrosyl-DNA Phosphodiesterase I, hydrolyzes 3'-phosphotyrosyl bonds to generate 3'-phosphate DNA and tyrosine, involved in the repair of DNA lesions created by topoisomerase I	12.9	15.5	7	10.8
YPL037C EGD1 Subunit beta1 of the nascent polypeptide-associated complex (NAC) involved in protein targeting, associated with cytoplasmic ribosomes; enhances DNA binding of the Gal4p activator; homolog of human BTF3b	187.2	297.1	152.1	309.9
YPR026W ATH1 Acid trehalase required for utilization of extracellular trehalose	93.5	80.9	58.7	65.2
YLR392C	23.6	34.8	8.4	15.9
YNR009W NRM1 Putative transcriptional repressor of MBF (MCB binding factor) target genes	25.8	18.4	23.6	21.6
YJR051W OSM1 Fumarate reductase, catalyzes the reduction of fumarate to succinate, required for the reoxidation of intracellular NADH under anaerobic conditions; mutations cause osmotic sensitivity	90.9	134	73.4	138.8
YHR135C YCK1 Palmitoylated, plasma membrane-bound casein kinase I isoform; shares redundant functions with Yck2p in morphogenesis, proper septin assembly, endocytic trafficking; provides an essential function overlapping with that of Yck2p	26.1	29.3	19.1	27.5
YER074W;YIL069C	459.5	1012.8	136.2	385
YJL117W PHO86 Endoplasmic reticulum (ER) resident protein required for ER exit of the high-affinity phosphate transporter Pho84p, specifically required for packaging of Pho84p into COPII vesicles	146	78.6	79.4	54.8
YKL021C MAK11 Protein essential for cell growth and replication of M dsRNA virus; contains four beta-transducin repeats	23.6	45.6	8.4	20.8
YNL237W YTP1 Probable type-III integral membrane protein of unknown function, has regions of similarity to mitochondrial electron transport proteins	39.4	31.6	40	41.1
YML012W ERV25 Protein that forms a heterotrimeric complex with Erp1, Erp2p, and Emp24, member of the p24 family involved in endoplasmic reticulum to Golgi transport	259.6	292.4	150.6	217.3
YPR093C ASR1 Protein involved in a putative alcohol-responsive signaling pathway; accumulates in the nucleus under alcohol stress; contains a Ring/PHD finger domain	44.1	46.9	24.6	33.5
YGL164C YRB30 RanGTP-binding protein, inhibits RanGAP1 (Rna1p)-mediated GTP hydrolysis of RanGTP (Gsp1p); shares similarity to proteins in other fungi but not in higher eukaryotes	29.2	40.5	18.3	32.5
YGL225W VRG4 Golgi GDP-mannose transporter; regulates Golgi function and glycosylation in Golgi	64.7	150.9	56.8	169.6
YLR426W	10.2	17	10.5	22.4
YHR203C;YJR145C	286.3	798.7	87.9	313.8
YNL165W	42.7	60.4	24.2	43.8
YML021C UNG1 Uracil-DNA glycosylase, required for repair of uracil in DNA formed by spontaneous cytosine deamination, not required for strand-specific mismatch repair, cell-cycle regulated, expressed in late G1, localizes to mitochondria and nucleus	58.7	61.2	54.5	72.7
YOL059W GPD2 NAD-dependent glycerol 3-phosphate dehydrogenase, homolog of Gpd1p, expression is controlled by an oxygen-independent signaling pathway required to regulate metabolism under anoxic conditions; located in cytosol and mitochondria	78.4	47.9	140.5	109.8
YAL019W-A	1.6	2.6	1.3	2.7
YMR207C HFA1 Mitochondrial acetyl-coenzyme A carboxylase, catalyzes the production of malonyl-CoA in mitochondrial fatty acid biosynthesis	26.5	34.4	4.4	7.3
YDR047W HEM12 Uroporphyrinogen decarboxylase, catalyzes the fifth step in the heme biosynthetic pathway; localizes to both the cytoplasm and nucleus; activity inhibited by Cu2+, Zn2+, Fe2+, Fe3+ and sulfhydryl-specific reagents	83.3	111	59.6	101.5
YLL050C COF1 Cofilin, promotes actin filament depolarization in a pH-dependent manner; binds both actin monomers and filaments and severs filaments , thought to be regulated by phosphorylation at SER4, ubiquitous and essential in eukaryotes	915.2	849.1	601.6	713.3
YGL036W	92.2	108.1	56.4	84.5
YMR246W FAA4 Long chain fatty acyl-CoA synthetase, regulates protein modification during growth in the presence of ethanol, functions to incorporate palmitic acid into phospholipids and neutral lipids	365	378.9	516.9	685.6
YHL044W	17.8	22.4	5.1	8.2
YDR148C KGD2 Dihydrolipoyl transsuccinylase, a component of the mitochondrial alpha-ketoglutarate dehydrogenase complex, which catalyzes a step in the tricarboxylic acid (TCA) cycle, the oxidative decarboxylation of alpha-ketoglutarate to succinyl-CoA	841.4	741.7	1192.5	1343
YDL212W SHR3 Endoplasmic reticulum packaging chaperone, required for incorporation of amino acid permeases into COPII coated vesicles for transport to the cell surface	82.4	138.8	30.3	65.2
YKL108W SLD2 Protein required for DNA replication, phosphorylated in S phase by S-phase cyclin-dependent kinases (Cdks), phosphorylation is essential for DNA replication and for complex formation with Dpb11p; potential Cdc28p substrate	17.8	24.8	12.1	21.5
YDR235W PRP42 U1 snRNP protein involved in splicing, required for U1 snRNP biogenesis; contains multiple tetriatricopeptide repeats	91.2	77.8	36.4	39.6
YGL047W ALG13 Catalytic component of UDP-GlcNAc transferase, required for the second step of dolichyl-linked oligosaccharide synthesis; anchored to the ER membrane via interaction with Alg14p; similar to bacterial and human glycosyltransferases	112.3	153.5	51	88.9
YGL055W OLE1 Fatty acid desaturase, required for monounsaturated fatty acid synthesis and for normal distribution of mitochondria	1308.8	1169.4	1658	1888.7
YBR167C POP7 Subunit of both RNase MRP, which cleaves pre-rRNA, and nuclear RNase P, which cleaves tRNA precursors to generate mature 5' ends	139.5	128.5	32.7	38.4
YBR039W ATP3 Gamma subunit of the F1 sector of mitochondrial F1F0 ATP synthase, which is a large, evolutionarily conserved enzyme complex required for ATP synthesis	354.4	436.1	404.9	635
YOR256C TRE2 Protein of unknown function with similarity to TRE1/YPL176C; required for cell viability	42.3	52.5	25.1	39.7
YMR089C YTA12 Component, with Afg3p, of the mitochondrial inner membrane m-AAA protease that mediates degradation of misfolded or unassembled proteins and is also required for correct assembly of mitochondrial enzyme complexes	83.5	94.4	34.5	49.7
YJR100C	55.3	70.5	18.9	30.7
YDR298C ATP5 Subunit 5 of the stator stalk of mitochondrial F1F0 ATP synthase, which is a large, evolutionarily conserved enzyme complex required for ATP synthesis; homologous to bovine subunit OSCP (oligomycin sensitivity-conferring protein)	341.5	452.7	408.2	689.4
YOR275C RIM20 Protein involved in proteolytic activation of Rim101p in response to alkaline pH; member of the PalA/AIP1/Alix family; interacts with the ESCRT-III subunits Snf7p, suggesting a relationship between the response to pH and multivesicular body formation	31.6	26.7	11.8	12.7
YGR027C RPS25A Protein component of the small (40S) ribosomal subunit; nearly identical to Rps25Bp and has similarity to rat S25 ribosomal protein	551	1224.4	239.4	677.3
YGR098C ESP1 Separase with cysteine protease activity (related to caspases) that promotes sister chromatid separation by mediating dissociation of the cohesin Scc1p from chromatin; inhibited by Pds1p	43.9	29.6	13.4	11.5
YOR081C TGL5 Triacylglycerol lipase involved in TAG mobilization; localizes to lipid particles; potential Cdc28p substrate	40.2	8.7	33.4	9.2
YJR115W	240	160.6	117.3	99.9
YFL009W CDC4 F-box protein required for G1/S and G2/M transition, associates with Skp1p and Cdc53p to form a complex, SCFCdc4, which acts as ubiquitin-protein ligase directing ubiquitination of the phosphorylated CDK inhibitor Sic1p	59.2	72.2	42.4	65.8
YPR191W QCR2 Subunit 2 of the ubiquinol cytochrome-c reductase complex, which is a component of the mitochondrial inner membrane electron transport chain; transcription is regulated by Hap1p, Hap2p/Hap3p, and heme	168.4	222.5	287.8	483.8
YOR142W LSC1 Alpha subunit of succinyl-CoA ligase, which is a mitochondrial enzyme of the TCA cycle that catalyzes the nucleotide-dependent conversion of succinyl-CoA to succinate	895.1	600.1	903.1	770.3
YDR253C MET32 Zinc-finger DNA-binding protein, involved in regulating expression of the methionine biosynthetic genes, similar to Met31p	107.8	79	17.7	16.5
YGR184C UBR1 Ubiquitin-protein ligase (E3) that interacts with Rad6p/Ubc2p to ubiquitinate substrates of the N-end rule pathway; binds to the Rpn2p, Rpt1p, and Rpt6p proteins of the 19S particle of the 26S proteasome	71.1	59.9	12.6	13.5
YMR181C	242.2	297.5	197.3	308.1
YBR179C FZO1 Mitochondrial integral membrane protein involved in mitochondrial fusion and maintenance of the mitochondrial genome; contains N-terminal GTPase domain	81.3	42.8	67.4	45.1
YKR004C ECM9 Non-essential protein of unknown function	75	58.6	14.3	14.2
YIL036W CST6 Basic leucine zipper (bZIP) transcription factor of the ATF/CREB family, activates transcription of genes involved in utilization of non-optimal carbon sources	63.8	37.5	48.6	36.3
YPL031C PHO85 Cyclin-dependent kinase, with ten cyclin partners; involved in environmental stress response; in phosphate-rich conditions, Pho85p-Pho80p complex phosphorylates Pho4p which in turn represses PHO5	66.1	116.3	38.8	86.7
YLR455W	83.5	104.1	15.6	24.7
YKR009C FOX2 Multifunctional enzyme of the peroxisomal fatty acid beta-oxidation pathway; has 3-hydroxyacyl-CoA dehydrogenase and enoyl-CoA hydratase activities	583.3	475.2	1042	1077.8
YCL050C APA1 Diadenosine 5',5''-P1,P4-tetraphosphate phosphorylase I (AP4A phosphorylase), involved in catabolism of bis(5'-nucleosidyl) tetraphosphates; has similarity to Apa2p	159.1	125	148.4	148
YLR386W VAC14 Protein involved in regulated synthesis of PtdIns(3,5)P(2), in control of trafficking of some proteins to the vacuole lumen via the MVB, and in maintenance of vacuole size and acidity; activator of Fab1p	25.1	31	26.6	41.7
YJL065C DLS1 Subunit of ISW2/yCHRAC chromatin accessibility complex along with Itc1p, Isw2p, and Dpb4p; involved in inheritance of telomeric silencing	31.3	56.4	10.1	23.1
YNL015W PBI2 Cytosolic inhibitor of vacuolar proteinase B, required for efficient vacuole inheritance; with thioredoxin forms protein complex LMA1, which assists in priming SNARE molecules and promotes vacuole fusion	1262	885.5	2223.1	1979.7
YFR042W	76.1	82	43	58.8
YFR040W SAP155 Protein that forms a complex with the Sit4p protein phosphatase and is required for its function; member of a family of similar proteins including Sap4p, Sap185p, and Sap190p	74.6	60.1	22.7	23.2
YKR101W SIR1 Protein involved in repression of transcription at the silent mating-type loci HML and HMR; recruitment to silent chromatin requires interactions with Orc1p and with Sir4p, through a common Sir1p domain; binds to centromeric chromatin	84.2	89.3	44.3	59.6
YGL044C RNA15 Cleavage and polyadenylation factor I (CF I) component involved in cleavage and polyadenylation of mRNA 3' ends; interacts with the A-rich polyadenylation signal in complex with Rna14p and Hrp1p	29.8	53.4	26.1	59.3
YMR218C TRS130 One of 10 subunits of the transport protein particle (TRAPP) complex of the cis-Golgi which mediates vesicle docking and fusion; involved in ER to Golgi membrane traffic; mutation activates transcription of OCH1	13.6	23.6	4.5	9.9
YNL025C SSN8 Cyclin-like component of the RNA polymerase II holoenzyme, involved in phosphorylation of the RNA polymerase II C-terminal domain; involved in glucose repression	19.9	39	6.2	15.4
YNL231C PDR16 Phosphatidylinositol transfer protein (PITP) controlled by the multiple drug resistance regulator Pdr1p, localizes to lipid particles and microsomes, controls levels of various lipids, may regulate lipid synthesis, homologous to Pdr17p	51.1	104.2	25.5	65.9
YML006C GIS4 CAAX box containing protein of unknown function, proposed to be involved in the RAS/cAMP signaling pathway	9.3	15	6.8	13.9
YOL057W	75.2	126.2	124.7	265.2
YLR257W	609	427.1	320.6	284.9
YJR038C	1.2	2.3	0.7	1.7
YGL141W HUL5 Protein with similarity to hect domain E3 ubiquitin-protein ligases, not essential for viability	52.4	93.5	49	110.7
YIL156W UBP7 Ubiquitin-specific protease that cleaves ubiquitin-protein fusions	13.5	14.9	6.3	8.8
YHR129C ARP1 Actin-related protein of the dynactin complex; required for spindle orientation and nuclear migration; putative ortholog of mammalian centractin	17.1	40.2	4	11.9
YMR116C ASC1 WD repeat protein (G-beta like protein) involved in translation regulation; required for repression of Gcn4p activity in the absence of amino-acid starvation; core component of the ribosome; ortholog of mammalian RACK1	184.3	755.5	38.4	199.2
YPR034W ARP7 Actin-related protein involved in transcriptional regulation; subunit of the chromatin remodeling Snf/Swi complex	34.4	50	28	51.5
YDL224C WHI4 Putative RNA binding protein and partially redundant Whi3p homolog that regulates the cell size requirement for passage through Start and commitment to cell division	54.6	59.6	82.9	114.5
YPL224C MMT2 Putative metal transporter involved in mitochondrial iron accumulation; closely related to Mmt1p	54.5	59.1	32.8	45
YNL049C SFB2 Probable component of COPII coated vesicles that binds to Sec23p; similar to and functionally redundant with Sec24p, but expressed at low levels; involved in ER to Golgi transport and in autophagy	15.2	16.9	9.1	12.8
YNL197C WHI3 RNA binding protein that binds to and sequesters the G1 cyclin CLN3 mRNA; regulates cell fate and dose-dependently inhibits passage through Start by regulating the critical cell size requirement necessary for cell cycle progression	45.7	36.8	65	66.2
YKL047W	35.3	63.5	22.9	52.1
YPR182W SMX3 Core Sm protein Sm F; part of heteroheptameric complex (with Smb1p, Smd1p, Smd2p, Smd3p, Sme1p, and Smx2p) that is part of the spliceosomal U1, U2, U4, and U5 snRNPs; homolog of human Sm F	122.9	113.3	86.8	101.2
YIL155C GUT2 Mitochondrial glycerol-3-phosphate dehydrogenase; expression is repressed by both glucose and cAMP and derepressed by non-fermentable carbon sources in a Snf1p, Rsf1p, Hap2/3/4/5 complex dependent manner	436	190.6	421.1	232.8
YCL005W LDB16 Protein of unknown function; null mutant shows a reduced affinity for the alcian blue dye suggesting a decreased net negative charge of the cell surface	64.1	77.9	33	50.7
YKL035W UGP1 UDP-glucose pyrophosphorylase (UGPase), catalyses the reversible formation of UDP-Glc from glucose 1-phosphate and UTP, involved in a wide variety of metabolic pathways, expression modulated by Pho85p through Pho4p	431.4	338.3	832.4	825.2
YFR020W	162.8	202.7	96.7	152.2
YER036C ARB1 ATPase of the ATP-binding cassette (ABC) family involved in 40S and 60S ribosome biogenesis, has similarity to Gcn20p; shuttles from nucleus to cytoplasm, physically interacts with Tif6p, Lsg1p	104.3	240.2	54.9	159.8
YER030W	244.7	231.1	137.1	163.6
YDR159W SAC3 Nuclear pore-associated protein, forms a complex with Thp1p that is involved in transcription and in mRNA export from the nucleus	19.1	19	7.4	9.3
YML079W	26	34.8	38.8	65.6
YHR103W SBE22 Protein involved in the transport of cell wall components from the Golgi to the cell surface; similar in structure and functionally redundant with Sbe2p; involved in bud growth	48.2	57.9	23.2	35.2
YPR119W CLB2 B-type cyclin involved in cell cycle progression; activates Cdc28p to promote the transition from G2 to M phase; accumulates during G2 and M, then targeted via a destruction box motif for ubiquitin-mediated degradation by the proteasome	9.4	13.4	1.5	2.7
YGR231C PHB2 Subunit of the prohibitin complex (Phb1p-Phb2p), a 1.2 MDa ring-shaped inner mitochondrial membrane chaperone that stabilizes newly synthesized proteins; determinant of replicative life span; involved in mitochondrial segregation	195.6	190.4	163	200.3
YDR212W TCP1 Alpha subunit of chaperonin-containing T-complex, which mediates protein folding in the cytosol; involved in maintenance of actin cytoskeleton; homolog to Drosophila melanogaster and mouse tailless complex polypeptide	71.1	150.8	70	187.4
YIL142W CCT2 Subunit beta of the cytosolic chaperonin Cct ring complex, related to Tcp1p, required for the assembly of actin and tubulins in vivo	98.1	177	79.1	180.1
YOL025W LAG2 Protein involved in determination of longevity; LAG2 gene is preferentially expressed in young cells; overexpression extends the mean and maximum life span of cells	53.4	45.6	38.7	41.7
YDR201W SPC19 Component of Dam1p complex, important for spindle and kinetochore integrity; localized to nuclear side of spindle pole body and along mitotic spindle	153.7	135.9	117.9	131.5
YGR227W DIE2 Dolichyl-phosphoglucose-dependent glucosyltransferase of the ER, functions in the dolichol pathway that synthesizes the dolichol-linked oligosaccharide precursor for N-linked protein glycosylation, has a role in regulation of ITR1 and INO1	13.9	12.9	12.9	15.1
YER125W RSP5 Ubiquitin-protein ligase involved in ubiquitin-mediated protein degradation; plays a role in heat shock element (HSE)-mediated gene expression and multivesicular body sorting; contains a hect (homologous to E6-AP carboxyl terminus) domain	100.1	115.2	101.3	147
YDR476C	163.3	96.8	216.9	162.1
YPL071C	62.2	94.5	12.9	24.7
YDR027C VPS54 Component of the GARP (Golgi-associated retrograde protein) complex, Vps51p-Vps52p-Vps53p-Vps54p, which is required for the recycling of proteins from endosomes to the late Golgi; potentially phosphorylated by Cdc28p	50.3	70.6	19.9	35.2
YNR050C LYS9 Saccharopine dehydrogenase (NADP+, L-glutamate-forming); catalyzes the formation of saccharopine from alpha-aminoadipate 6-semialdehyde, which is the seventh step in lysine biosynthesis pathway	23.8	32.5	17.1	29.4
YJL194W CDC6 Essential ATP-binding protein required for DNA replication, component of the pre-replicative complex (pre-RC) which requires ORC to associate with chromatin and is in turn required for Mcm2-7p DNA association; homologous to S. pombe Cdc18p	6.1	9.5	10.2	20
YNL014W HEF3 Translational elongation factor EF-3; paralog of YEF3 and member of the ABC superfamily; stimulates EF-1 alpha-dependent binding of aminoacyl-tRNA by the ribosome; normally expressed in zinc deficient cells	566.7	384.4	859.3	733.7
YOR144C ELG1 Protein required for S phase progression and telomere homeostasis, forms an alternative replication factor C complex important for DNA replication and genome integrity; mutants are sensitive to DNA damage	21.2	26.3	11.4	17.8
YLR077W FMP25 The authentic, non-tagged protein was localized to the mitochondria	12.3	23.1	4.4	10.4
YCL017C NFS1 Cysteine desulfurase involved in iron-sulfur cluster (Fe/S) biogenesis; required for the post-transcriptional thio-modification of mitochondrial and cytoplasmic tRNAs; essential protein located predominantly in mitochondria	167.7	161.9	198.9	241.5
YLR353W BUD8 Protein involved in bud-site selection; diploid mutants display a unipolar budding pattern instead of the wild-type bipolar pattern, and bud at the proximal pole	15.4	32.9	3.5	9.4
YLR199C	42.3	62.7	34.9	65
YBR218C PYC2 Pyruvate carboxylase isoform, cytoplasmic enzyme that converts pyruvate to oxaloacetate; highly similar to isoform Pyc1p but differentially regulated; mutations in the human homolog are associated with lactic acidosis	149.3	111.5	121	113.5
YGL088W	294.9	194.9	73.5	61
YHR081W LRP1 Substrate-specific nuclear cofactor for exosome activity in the processing of stable RNAs; homolog of mammalian nuclear matrix protein C1D, which is involved in regulation of DNA repair and recombination	48.7	53.4	28.4	39.1
YLR139C SLS1 Mitochondrial membrane protein required for assembly of respiratory-chain enzyme complexes III and IV; coordinates expression of mitochondrially-encoded genes; may facilitate delivery of mRNA to membrane-bound translation machinery	3.7	3.8	3.8	4.9
YGL222C EDC1 RNA-binding protein, activates mRNA decapping directly by binding to the mRNA substrate and enhancing the activity of the decapping proteins Dcp1p and Dcp2p	42.6	50.6	55.6	82.9
YML058W SML1 Ribonucleotide reductase inhibitor involved in regulating dNTP production; regulated by Mec1p and Rad53p during DNA damage and S phase	737.9	706.5	1131.9	1360.3
YCL052C PBN1 Essential component of glycosylphosphatidylinositol-mannosyltransferase I, required for the autocatalytic post-translational processing of the protease B precursor Prb1p, localizes to ER in lumenal orientation; homolog of mammalian PIG-X	132.9	179.4	59.2	100.3
YDL203C	19.2	16.1	9.6	10.1
YJL150W	10.5	8.1	12.3	11.9
YLR446W	203.9	261.6	79.6	128
YOR039W CKB2 Beta' regulatory subunit of casein kinase 2, a Ser/Thr protein kinase with roles in cell growth and proliferation; the holoenzyme also contains CKA1, CKA2 and CKB1, the many substrates include transcription factors and all RNA polymerases	226.3	276.5	139.7	213.9
YGL097W SRM1 Nucleotide exchange factor for Gsp1p, localizes to the nucleus, required for nucleocytoplasmic trafficking of macromolecules; potentially phosphorylated by Cdc28p	46.2	98.6	30.1	80.5
YMR090W	263	376.4	136.8	245.3
YMR105C PGM2 Phosphoglucomutase, catalyzes the conversion from glucose-1-phosphate to glucose-6-phosphate, which is a key step in hexose metabolism; functions as the acceptor for a Glc-phosphotransferase	509.6	668	1035.9	1700.9
YFR011C	71.1	74.9	51.1	67.4
YMR274C RCE1 Type II CAAX prenyl protease involved in the proteolysis and maturation of Ras and the a-factor mating pheromone	18	31.9	8.7	19.3
YBR230C OM14 Hypothetical protein	1215.5	1641.4	1238.7	2093.5
YMR275C BUL1 Ubiquitin-binding component of the Rsp5p E3-ubiquitin ligase complex, functional homolog of Bul2p, disruption causes temperature-sensitive growth, overexpression causes missorting of amino acid permeases	24.3	31.9	22.4	36.8
YNL153C GIM3 Subunit of the heterohexameric cochaperone prefoldin complex which binds specifically to cytosolic chaperonin and transfers target proteins to it	139.9	180.7	132.7	214.4
YLR273C PIG1 Putative targeting subunit for the type-1 protein phosphatase Glc7p that tethers it to the Gsy2p glycogen synthase	100.3	158.5	34	67.2
YIL027C KRE27 Protein of unknown function; null mutant shows K1 killer toxin resistance	114.2	155.5	76.4	130.1
YNL037C IDH1 Subunit of mitochondrial NAD(+)-dependent isocitrate dehydrogenase, which catalyzes the oxidation of isocitrate to alpha-ketoglutarate in the TCA cycle	556.7	618.9	1370.2	1905
YGR097W ASK10 Component of the RNA polymerase II holoenzyme, phosphorylated in response to oxidative stress; has a role in destruction of Ssn8p, which relieves repression of stress-response genes	43	61.5	38.4	68.6
YLR268W SEC22 R-SNARE protein; assembles into SNARE complex with Bet1p, Bos1p and Sed5p; cycles between the ER and Golgi complex; involved in anterograde and retrograde transport between the ER and Golgi; synaptobrevin homolog	79.5	110.7	74.4	129.4
YDL128W VCX1 Vacuolar H+/Ca2+ exchanger involved in control of cytosolic Ca2+ concentration; has similarity to sodium/calcium exchangers, including the bovine Na+/Ca2+,K+ antiporter	21.1	39.1	15.9	36.8
YML100W TSL1 Large subunit of trehalose 6-phosphate synthase (Tps1p)/phosphatase (Tps2p) complex, which converts uridine-5'-diphosphoglucose and glucose 6-phosphate to trehalose, homologous to Tps3p and may share function	79.1	30.1	82.9	39.4
YLR251W SYM1 Protein required for ethanol metabolism; induced by heat shock and localized to the inner mitochondrial membrane; homologous to mammalian peroxisomal membrane protein Mpv17	40	72.2	16.2	36.5
YMR156C TPP1 DNA 3'-phosphatase that functions in repair of endogenous damage of double-stranded DNA, activity is specific for removal of 3' phosphates at strand breaks; has similarity to the l-2-haloacid dehalogenase superfamily	15.1	17.5	11.2	16.2
YKL105C	31.4	30.7	16.8	20.5
YIL134W FLX1 Protein required for transport of flavin adenine dinucleotide (FAD) from mitochondria, where it is synthesized from riboflavin, to the cytosol	4.8	8.2	2.3	4.9
YBR126C TPS1 Synthase subunit of trehalose-6-phosphate synthase/phosphatase complex, which synthesizes the storage carbohydrate trehalose; also found in a monomeric form; expression is induced by the stress response and repressed by the Ras-cAMP pathway	420.4	322.6	648.4	620.2
YKL011C CCE1 Mitochondrial cruciform cutting endonuclease, cleaves Holliday junctions formed during recombination of mitochondrial DNA	37.2	48.9	13	21.3
YJR091C JSN1 Member of the Puf family of RNA-binding proteins, interacts with mRNAs encoding membrane-associated proteins; overexpression suppresses a tub2-150 mutation and causes increased sensitivity to benomyl in wild-type cells	39.4	31.7	71.1	71.3
YDL199C	145.7	157.9	264.9	357.7
YPR067W ISA2 Protein required for maturation of mitochondrial and cytosolic Fe/S proteins, localizes to the mitochondrial intermembrane space, overexpression of ISA2 suppresses grx5 mutations	62.9	54.3	26.5	28.5
YOR155C ISN1 Inosine 5'-monophosphate (IMP)-specific 5'-nucleotidase, catalyzes the breakdown of IMP to inosine, does not show similarity to known 5'-nucleotidases from other organisms	68.4	96.2	43.5	76.2
YHR029C YHI9 Protein of unknown function that is a member of the PhzF superfamily, although unlike its bacterial homolog, is most likely not involved in phenazine production; possibly involved in a membrane regulation metabolic pathway	36.1	44.6	31	47.7
YLR043C TRX1 Cytoplasmic thioredoxin isoenzyme of the thioredoxin system which protects cells against both oxidative and reductive stress, forms LMA1 complex with Pbi2p, acts as a cofactor for Tsa1p, required for ER-Golgi transport and vacuole inheritance	406.5	538.9	365.6	603.6
YKL157W APE2 Zinc-dependent metallopeptidase yscII, may have a role in obtaining leucine from dipeptide substrates; sequence coordinates have changed since RT-PCR analysis showed that the adjacent ORF YKL158W comprises the 5' exon of APE2/YKL157W	663.9	314.4	664.1	391.6
YNL099C OCA1 Putative protein tyrosine phosphatase, required for cell cycle arrest in response to oxidative damage of DNA	62.7	77.4	34.1	52.4
YDL040C NAT1 Subunit of the N-terminal acetyltransferase NatA (Nat1p, Ard1p, Nat5p); N-terminally acetylates many proteins, which influences multiple processes such as the cell cycle, heat-shock resistance, mating, sporulation, and telomeric silencing	60.2	72.6	57.5	86.3
YNL022C	14	24.9	3.3	7.3
YOR061W CKA2 Alpha' catalytic subunit of casein kinase 2, a Ser/Thr protein kinase with roles in cell growth and proliferation; the holoenzyme also contains CKA1, CKB1 and CKB2, the many substrates include transcription factors and all RNA polymerases	57.3	95.6	22.8	47.3
YGR239C PEX21 Part of a two-member peroxin family (Pex18p and Pex21p) specifically required for peroxisomal targeting of the Pex7p peroxisomal signal recognition factor and PTS2-type peroxisomal matrix proteins	49.8	79.1	106.7	210.7
YGL243W TAD1 tRNA-specific adenosine deaminase, deaminates adenosine-37 to inosine in tRNA-Ala	18.3	31.2	4.2	8.9
YGL019W CKB1 Beta regulatory subunit of casein kinase 2, a Ser/Thr protein kinase with roles in cell growth and proliferation; the holoenzyme also contains CKA1, CKA2 and CKB2, the many substrates include transcription factors and all RNA polymerases	47.8	62.3	20.5	33.2
YAL060W BDH1 NAD-dependent (2R,3R)-2,3-butanediol dehydrogenase, a zinc-containing medium-chain alcohol dehydrogenase, produces 2,3-butanediol from acetoin during fermentation and allows using 2,3-butanediol as a carbon source during aerobic growth	168.1	172.7	56.7	72.3
YBL041W PRE7 20S proteasome beta-type subunit	425.5	581.3	379.9	644.1
YNL054W VAC7 Integral vacuolar membrane protein involved in vacuole inheritance and morphology; may function to regulate Fab1p kinase activity	64.4	36.3	34.6	24.2
YPR033C HTS1 Cytoplasmic and mitochondrial histidine tRNA synthetase; encoded by a single nuclear gene that specifies two messages; efficient mitochondrial localization requires both a presequence and an amino-terminal sequence	49.8	72.6	36.1	65.3
YML036W CGI121 Hypothetical protein	32.9	49.4	18.2	33.9
YBL072C;YER102W	624.9	1501.1	187.5	558.6
YBL027W;YBR084C-A	1227.8	1957.6	307	607
YGL100W SEH1 Nuclear pore protein that is part of the evolutionarily conserved Nup84p complex (Nup84p, Nup85p, Nup120p, Nup145p, and Seh1p); homologous to Sec13p	60.3	116.1	32.3	77.1
YDR437W GPI19 Subunit of GPI-GlcNAc transferase involved in synthesis of N-acetylglucosaminyl phosphatidylinositol (GlcNAc-PI), which is the first intermediate in glycosylphosphatidylinositol (GPI) anchor synthesis, shares similarity with mammalian PIG-P	26.6	26.2	34.4	42
YGL057C	47.9	52.6	88.6	120.6
YLL026W HSP104 Heat shock protein that cooperates with Ydj1p (Hsp40) and Ssa1p (Hsp70) to refold and reactivate previously denatured, aggregated proteins; responsive to stresses including: heat, ethanol, and sodium arsenite; involved in [PSI+] propagation	345.1	496.2	239.9	427.5
YKR093W PTR2 Integral membrane peptide transporter, mediates transport of di- and tri-peptides; conserved protein that contains 12 transmembrane domains; PTR2 expression is regulated by the N-end rule pathway via repression by Cup9p	16.4	12.9	15.9	15.5
YDL010W	252	247.9	230.2	280.6
YIL163C	7.7	4.8	18	13.9
YIR037W HYR1 Thiol peroxidase that functions as a hydroperoxide receptor to sense intracellular hydroperoxide levels and transduce a redox signal to the Yap1p transcription factor	383.5	474.7	551.9	845.9
YHL024W RIM4 Putative RNA-binding protein required for the expression of early and middle sporulation genes	933.9	1685.2	1600.8	3575.5
YDR242W AMD2 Putative amidase	52.2	80.8	14.2	27.2
YFR026C	44.1	71.3	10.5	21
YNL239W LAP3 Aminopeptidase of cysteine protease family, has a DNA binding activity and acts as bleomycin hydrolase in vitro; transcription is regulated by galactose via Gal4p	118.8	156.9	136.2	222.5
YLR219W MSC3 Protein of unknown function, green fluorescent protein (GFP)-fusion protein localizes to the cell periphery; msc3 mutants are defective in directing meiotic recombination events to homologous chromatids; potential Cdc28p substrate	43.9	35.1	26.8	26.5
YDL084W SUB2 Component of the TREX complex required for nuclear mRNA export; DEAD-box RNA helicase involved in early and late steps of spliceosome assembly; homolog of the human splicing factor hUAP56	219	343.1	152	294.5
YMR212C EFR3 Non-essential protein of unknown function; exhibits synthetic lethal genetic interactions with PHO85; green fluorescent protein (GFP)-fusion protein localizes to the cell periphery	29.4	69.1	9.6	27.9
YDL145C COP1 Alpha subunit of COPI vesicle coatomer complex, which surrounds transport vesicles in the early secretory pathway	43.4	51.7	36.8	54.2
YBR088C POL30 Proliferating cell nuclear antigen (PCNA), functions as the sliding clamp for DNA polymerase delta; may function as a docking site for other proteins required for mitotic and meiotic chromosomal DNA replication and for DNA repair	77.5	135.6	85.8	185.6
YCR010C ADY2 Acetate transporter required for normal sporulation	12513.1	9393	16365.9	15180.3
YPL262W FUM1 Fumarase, converts fumaric acid to L-malic acid in the TCA cycle; cytosolic and mitochondrial localization determined by the N-terminal mitochondrial targeting sequence and protein conformation	427.6	596.1	558.7	962.4
YBR031W;YDR012W	439.9	736.3	229	473.5
YCL057W PRD1 Zinc metalloendopeptidase, found in the cytoplasm and intermembrane space of mitochondria; with Cym1p, involved in degradation of mitochondrial proteins and of presequence peptides cleaved from imported proteins	236.7	336	256.7	450
YHR041C SRB2 General transcription factor, subunit of the RNA polymerase II mediator complex; associates with core polymerase subunits to form the RNA polymerase II holoenzyme	10.2	27.3	8.2	27.1
YOR017W PET127 Protein with a role in mitochondrial RNA stability and/or processing, located in the mitochondrial membrane	19.4	14.8	12	11.3
YIL039W	95.4	112.2	64.5	93.6
YJL097W PHS1 Protein of unknown function; homolog of mammalian PTPLA; involved in sphingolipid biosynthesis; required for cell viability	89.4	170.7	67.1	158
YER096W SHC1 Sporulation-specific activator of Chs3p (chitin synthase III), required for the synthesis of the chitosan layer of ascospores; has similarity to Skt5p, which activates Chs3p during vegetative growth; transcriptionally induced at alkaline pH	105.6	162.6	81.8	155.3
YJL125C GCD14 Subunit of tRNA (1-methyladenosine) methyltransferase, with Gcd10p, required for the modification of the adenine at position 58 in tRNAs, especially tRNAi-Met; first identified as a negative regulator of GCN4 expression	16.8	33.6	8.8	21.7
YDL029W ARP2 Essential component of the Arp2/3 complex, which is a highly conserved actin nucleation center required for the motility and integrity of actin patches; involved in endocytosis and membrane growth and polarity	144.1	176.9	81	122.6
YOR048C RAT1 Nuclear 5' to 3' single-stranded RNA exonuclease, involved in RNA metabolism, including rRNA and snRNA processing as well as mRNA transcription termination	20.9	37.7	17.9	39.8
YGL240W DOC1 Processivity factor required for the ubiquitination activity of the anaphase promoting complex (APC), mediates the activity of the APC by contributing to substrate recognition; involved in cyclin proteolysis	148.1	198.3	428	706.1
YPR006C ICL2 2-methylisocitrate lyase of the mitochondrial matrix, functions in the methylcitrate cycle to catalyze the conversion of 2-methylisocitrate to succinate and pyruvate; ICL2 transcription is repressed by glucose and induced by ethanol	550.1	902.1	587.2	1186.2
YMR176W ECM5 Non-essential protein of unknown function, contains ATP/GTP-binding site motif A; null mutant exhibits cellular volume up to four times greater than wild-type, also large drooping buds with elongated necks	37.6	49.5	11.1	18
YHR056C RSC30 One of 15 subunits of the 'Remodel the Structure of Chromatin' (RSC) complex; non-essential gene required for regulation of ribosomal protein genes and the cell wall/stress response; highly similar to Rsc3p; null mutants are osmosensitive	19.2	20.6	19	25.1
YDR105C TMS1 Vacuolar membrane protein of unknown function that is conserved in mammals; predicted to contain eleven transmembrane helices; interacts with Pdr5p, a protein involved in multidrug resistance	80.8	56.8	44.6	38.6
YLR153C ACS2 Acetyl-coA synthetase isoform, required for growth on glucose; expressed under anaerobic conditions	61	80.5	83	134.8
YNL186W UBP10 Ubiquitin-specific protease that deubiquitinates ubiquitin-protein moieties; may regulate silencing by acting on Sir4p; involved in posttranscriptionally regulating Gap1p and possibly other transporters; primarily located in the nucleus	82.7	131.6	43.2	84.6
YLR318W EST2 Reverse transcriptase subunit of the telomerase holoenzyme, essential for telomerase core catalytic activity, involved in other aspects of telomerase assembly and function; mutations in human homolog are associated with aplastic anemia	18.3	46.9	2.6	8.2
YLL042C ATG10 E2-like conjugating enzyme that mediates formation of the Atg12p-Atg5p conjugate, which is a critical step in autophagy	17	23.6	9.6	16.4
YBL098W BNA4 Kynurenine 3-mono oxygenase, required for biosynthesis of nicotinic acid from tryptophan via kynurenine pathway	157.2	248.7	99.4	193.5
YHR054C;YHR056C	38.1	38.3	11.4	14.1
YLL033W	14.3	35.8	6.3	19.4
YKL178C STE3 Receptor for a factor receptor, transcribed in alpha cells and required for mating by alpha cells, couples to MAP kinase cascade to mediate pheromone response; ligand bound receptors are endocytosed and recycled to the plasma membrane; GPCR	34	55.3	11.1	22.2
YGL073W HSF1 Trimeric heat shock transcription factor, activates multiple genes in response to hyperthermia; recognizes variable heat shock elements (HSEs) consisting of inverted NGAAN repeats; constitutively DNA-bound; posttranslationally regulated	45.9	59.3	44.2	70.2
YPL225W	444.4	401.9	403.5	448.5
YKL152C GPM1 Tetrameric phosphoglycerate mutase, mediates the conversion of 3-phosphoglycerate to 2-phosphoglycerate during glycolysis and the reverse reaction during gluconeogenesis	285.3	199.1	287.9	246.9
YBR216C YBP1 Protein required for oxidation of specific cysteine residues of the transcription factor Yap1p, resulting in the nuclear localization of Yap1p in response to stress	59	79.9	29.7	49.4
YJR019C TES1 Peroxisomal acyl-CoA thioesterase likely to be involved in fatty acid oxidation rather than fatty acid synthesis; conserved protein also found in human peroxisomes; TES1 mRNA levels increase during growth on fatty acids	42.8	45.7	52.1	68.3
YNL127W FAR11 Protein involved in G1 cell cycle arrest in response to pheromone, in a pathway different from the Far1p-dependent pathway; interacts with Far3p, Far7p, Far8p, Far9p, and Far10p	59.9	65.8	65.2	87.9
YPR089W	15.7	19.9	10.8	16.8
YGR006W PRP18 Splicing factor involved in the positioning of the 3' splice site during the second catalytic step of splicing, recruited to the spliceosome by Slu7p	11.3	16.3	8.7	15.4
YLR248W RCK2 Protein kinase involved in the response to oxidative and osmotic stress; identified as suppressor of S. pombe cell cycle checkpoint mutations	208.7	179.5	232.8	245.7
YLL018C-A COX19 Protein required for cytochrome c oxidase assembly, located in the cytosol and mitochondrial intermembrane space; putative copper metallochaperone that delivers copper to cytochrome c oxidase	299.5	292	604.6	723.2
YDR205W MSC2 Member of the cation diffusion facilitator family, localizes to the endoplasmic reticulum and nucleus; mutations affect the cellular distribution of zinc and also confer defects in meiotic recombination between homologous chromatids	19.4	33.2	14.1	29.6
YGL028C SCW11 Cell wall protein with similarity to glucanases; may play a role in conjugation during mating based on its regulation by Ste12p	10.2	10.4	1.2	1.5
YOR204W DED1 ATP-dependent DEAD (Asp-Glu-Ala-Asp)-box RNA helicase, required for translation initiation of all yeast mRNAs; mutations in human DEAD-box DBY are a frequent cause of male infertility	107.4	123.1	321.7	452
YDR307W	43.8	55.8	55.6	86.8
YAL031C GIP4 Cytoplasmic Glc7p-interacting protein, potential Cdc28p substrate	41.7	49.4	31	45
YPR060C ARO7 Chorismate mutase, catalyzes the conversion of chorismate to prephenate to initiate the tyrosine/phenylalanine-specific branch of aromatic amino acid biosynthesis	51.3	70.9	21.1	35.7
YML103C NUP188 Subunit of the nuclear pore complex (NPC), involved in the structural organization of the complex and of the nuclear envelope, also involved in nuclear envelope permeability, interacts with Pom152p and Nic96p	30.4	23	14.9	13.8
YLR070C XYL2 Xylitol dehydrogenase, converts xylitol to D-xylulose in the endogenous xylose utilization pathway	37.3	51.2	53.8	90.4
YIL030C SSM4 Ubiquitin-protein ligase of the ER/nuclear envelope, required for degradation of Alpha2p and other proteins containing a Deg1 degradation signal; ssm4 mutation suppresses mRNA instability caused by an rna14 mutation	47.6	69.6	65.2	116.7
YBR199W KTR4 Putative mannosyltransferase involved in protein glycosylation; member of the KRE2/MNT1 mannosyltransferase family	132	212.1	128.6	252.9
YMR137C PSO2 Required for a post-incision step in the repair of DNA single and double-strand breaks that result from interstrand crosslinks produced by a variety of mono- and bi-functional psoralen derivatives; induced by UV-irradiation	24	38.9	5.8	11.5
YER074W RPS24A Protein component of the small (40S) ribosomal subunit; identical to Rps24Bp and has similarity to rat S24 ribosomal protein	287	527	154.7	347.4
YLR144C ACF2 Intracellular beta-1,3-endoglucanase, expression is induced during sporulation; may have a role in cortical actin cytoskeleton assembly	27.6	41.3	19.4	35.5
YOL126C MDH2 Cytoplasmic malate dehydrogenase, one of the three isozymes that catalyze interconversion of malate and oxaloacetate; involved in gluconeogenesis during growth on ethanol or acetate as carbon source; interacts with Pck1p and Fbp1p	1156	1451.5	2110.3	3240.2
YML030W	229.9	249.8	160.8	213.6
YBR056W	287.1	233.9	246	245
YLR084C RAX2 N-glycosylated protein involved in the maintenance of bud site selection during bipolar budding; localization requires Rax1p	63.1	15.6	37.4	11.3
YKL069W	78.8	121.9	42	79.4
YOR008C SLG1 Sensor-transducer of the stress-activated PKC1-MPK1 kinase pathway involved in maintenance of cell wall integrity; involved in organization of the actin cytoskeleton; secretory pathway Wsc1p is required for the arrest of secretion response	103.1	105.8	150.1	188.2
YOR031W CRS5 Copper-binding metallothionein, required for wild-type copper resistance	396.7	155	110.4	52.7
YDR227W SIR4 Silent information regulator that, together with SIR2 and SIR3, is involved in assembly of silent chromatin domains at telomeres and the silent mating-type loci; potentially phosphorylated by Cdc28p; some alleles of SIR4 prolong lifespan	72.1	39.4	37.3	24.9
YKL020C SPT23 ER membrane protein involved, with its homolog Mga2p, in regulation of OLE1 transcription; inactive ER form dimerizes and one subunit is then activated by ubiquitin/proteasome-dependent processing followed by nuclear targeting	31.3	30.6	30.9	36.9
YER083C GET2 Subunit of the GET complex; required for meiotic nuclear division and for the retrieval of HDEL proteins from the Golgi to the ER in an ERD2 dependent fashion; may be involved in cell wall function	43	65.9	56.5	105.7
YDL020C RPN4 Transcription factor that stimulates expression of proteasome genes; Rpn4p levels are in turn regulated by the 26S proteasome in a negative feedback control mechanism; RPN4 is transcriptionally regulated by various stress responses	348.3	409	224.5	321.8
YDR221W	26.2	38.5	17.9	32.1
YOL038W PRE6 20S proteasome alpha-type subunit	549.6	883.7	531.8	1043.3
YDL134C PPH21 Catalytic subunit of protein phosphatase 2A, functionally redundant with Pph22p; methylated at C terminus; forms alternate complexes with several regulatory subunits; involved in signal transduction and regulation of mitosis	129.6	182.1	41.3	70.8
YBR297W MAL33 MAL-activator protein, part of complex locus MAL3; nonfunctional in genomic reference strain S288C	98	86.9	55.5	60
YPR148C	202.3	254.7	139.3	213.8
YPR073C LTP1 Protein phosphotyrosine phosphatase of unknown cellular role; activated by adenine	184.4	237.3	208.7	327.4
YIL153W RRD1 Activator of the phosphotyrosyl phosphatase activity of PP2A; regulates G1 phase progression, the G2/M phase transition, microtubule dynamics, the osmoresponse, bud morphogenesis and DNA repair; subunit of the Tap42p-Sit4p-Rrd1p complex	60	30.7	68	42.4
YJL139C YUR1 Mannosyltransferase of the KTR1 family, involved in protein N-glycosylation; located in the Golgi apparatus	47.5	35.8	9.8	9
YBR274W CHK1 DNA damage checkpoint effector kinase, mediates mitotic cell cycle arrest via phosphorylation of Pds1p; phosphorylated by checkpoint signal transducer kinase Mec1p; homolog of S. pombe and mammalian Chk1 checkpoint kinase	48.5	63.9	16.7	26.8
YBR038W CHS2 Chitin synthase II, requires activation from zymogenic form in order to catalyze the transfer of N-acetylglucosamine (GlcNAc) to chitin; required for the synthesis of chitin in the primary septum during cytokinesis	3.3	3	2.8	3.1
YDR283C GCN2 Protein kinase, phosphorylates the alpha-subunit of translation initiation factor eIF2 (Sui2p) in response to starvation; activated by uncharged tRNAs and the Gcn1p-Gcn20p complex	33.3	38.5	15.2	21.4
YJR043C POL32 Third subunit of DNA polymerase delta, involved in chromosomal DNA replication; required for error-prone DNA synthesis in the presence of DNA damage and processivity; interacts with Hys2p, PCNA (Pol30p), and Pol1p	10.2	29.1	5.5	19.1
YPL070W MUK1 Protein of unknown function, localized to the cytoplasm; computational analysis of large-scale protein-protein interaction data suggests a possible role in transcriptional regulation	51.3	82.3	33.9	66.2
YNL167C SKO1 Basic leucine zipper (bZIP) transcription factor of the ATF/CREB family that forms a complex with Tup1p and Ssn6p to both activate and repress transcription; cytosolic and nuclear protein involved in the osmotic and oxidative stress responses	34.9	36.7	32.5	41.6
YOL052C-A DDR2 Multistress response protein, expression is activated by a variety of xenobiotic agents and environmental or physiological stresses	870.1	670.5	1075.7	1008.7
YHL026C	35.1	56.7	8.7	17.1
YKL107W	145.5	188.1	168.5	265
YMR142C RPL13B Protein component of the large (60S) ribosomal subunit, nearly identical to Rpl13Ap; not essential for viability; has similarity to rat L13 ribosomal protein	230.6	537.7	67.2	190.5
YGL085W	67.6	77.6	22	30.7
YCR020C PET18 Protein required for respiratory growth and stability of the mitochondrial genome	69.4	89.5	34	53.3
YPR129W SCD6 Protein containing an Lsm domain, may bind RNA and have a role in RNA processing; overproduction suppresses a null mutation in CHC1, which encodes the heavy chain of clathrin	50.1	52.4	79.6	101.2
YPL164C MLH3 Protein involved in DNA mismatch repair; forms a complex with Mlh1p to promote meiotic crossing-over; mammalian homolog is implicated mammalian microsatellite instability	125.2	145.6	55.4	78.3
YOL008W COQ10 Coenzyme Q binding protein, required for function of coenzyme Q in respiration by functioning in the delivery of Q<sub>6</sub> to its proper location for electron transport, START domain protein with homologs in bacteria and eukaryotes	25.2	33.4	40.8	65.7
YKR034W DAL80 Negative regulator of genes in multiple nitrogen degradation pathways; expression is regulated by nitrogen levels and by Gln3p; member of the GATA-binding family, forms homodimers and heterodimers with Deh1p	76	73.4	64.6	75.8
YIL009C-A EST3 Component of the telomerase holoenzyme, involved in telomere replication	16.6	40	2.7	7.9
YNL251C NRD1 RNA-binding protein that interacts with the C-terminal domain of the RNA polymerase II large subunit (Rpo21p), required for transcription termination and 3' end maturation of nonpolyadenylated RNAs	113.8	110.8	128	151.3
YJL174W KRE9 Glycoprotein involved in cell wall beta-glucan assembly; null mutation leads to severe growth defects, aberrant multibudded morphology, and mating defects	233.2	333.8	255.7	444.1
YOR380W RDR1 Transcriptional repressor involved in the control of multidrug resistance; negatively regulates expression of the PDR5 gene; member of the Gal4p family of zinc cluster proteins	13.4	21.3	2.8	5.4
YJL190C RPS22A Protein component of the small (40S) ribosomal subunit; nearly identical to Rps22Bp and has similarity to E. coli S8 and rat S15a ribosomal proteins	115.1	236.7	34	84.8
YJL137C GLG2 Self-glucosylating initiator of glycogen synthesis, also glucosylates n-dodecyl-beta-D-maltoside; similar to mammalian glycogenin	86.5	214.2	91.7	275.4
YLR351C NIT3 Nit protein, one of two proteins in S. cerevisiae with similarity to the Nit domain of NitFhit from fly and worm and to the mouse and human Nit protein which interacts with the Fhit tumor suppressor; nitrilase superfamily member	100.1	128.3	61.7	95.9
YGL227W VID30 Protein involved in proteasome-dependent catabolite degradation of fructose-1,6-bisphosphatase (FBPase); shifts the balance of nitrogen metabolism toward the production of glutamate; localized to the nucleus and the cytoplasm	88.2	84.6	78.5	91.3
YGR194C XKS1 Xylulokinase, converts D-xylulose and ATP to xylulose 5-phosphate and ADP; rate limiting step in fermentation of xylulose; required for xylose fermentation by recombinant S. cerevisiae strains	87.4	115.6	27	43.3
YLR121C YPS3 Aspartic protease, attached to the plasma membrane via a glycosylphosphatidylinositol (GPI) anchor	14.1	1.8	18.1	2.8
YLR239C LIP2 Lipoyl ligase, involved in the modification of mitochondrial enzymes by the attachment of lipoic acid groups	22.3	30.9	8.1	13.6
YDR432W NPL3 RNA-binding protein that carries poly(A)+ mRNA from the nucleus into the cytoplasm; phosphorylation by Sky1p in the cytoplasm may promote release of mRNAs	214.6	179.3	535.1	541.6
YKL141W SDH3 Cytochrome b subunit of succinate dehydrogenase (Sdh1p, Sdh2p, Sdh3p, Sdh4p), which couples the oxidation of succinate to the transfer of electrons to ubiquinone	505	522	728.7	912.3
YBR125C PTC4 Cytoplasmic type 2C protein phosphatase; identified as a high-copy number suppressor of the synthetic lethality of a cnb1 mpk1 double deletion; overexpression decreases high-osmolarity induced Hog1p phosphorylation and kinase activity	44.1	80.9	12.7	28.2
YLR383W SMC6 Protein involved in structural maintenance of chromosomes; required for interchromosomal and sister chromatid recombination; homologous to S. pombe rad18	26.3	40.9	6.8	12.8
YFR024C-A LSB3 Protein containing a C-terminal SH3 domain; binds Las17p, which is a homolog of human Wiskott-Aldrich Syndrome protein involved in actin patch assembly and actin polymerization	119.1	147.2	139.8	209.1
YNL016W PUB1 Poly(A)+ RNA-binding protein, abundant mRNP-component protein hypothesized to bind a pool of non-translatable mRNAs; not reported to associate with polyribosomes	71.6	70	169.5	200.5
YFR018C	81.1	108.2	78.5	126.7
YFL008W SMC1 Subunit of the multiprotein cohesin complex, essential protein involved in chromosome segregation and in double-strand DNA break repair; SMC chromosomal ATPase family member, binds DNA with a preference for DNA with secondary structure	110.2	127.6	106.8	149.6
YNL257C SIP3 Protein that activates transcription through interaction with DNA-bound Snf1p, C-terminal region has a putative leucine zipper motif; potential Cdc28p substrate	19.9	37.4	6.6	15
YOL034W SMC5 Structural maintenance of chromosomes (SMC) protein, interacts with Smc6p and Nse1p to form a large complex; S. pombe homolog forms a heterodimer with S. pombe Rad18p that is involved in DNA repair	18.9	27.2	7.3	12.7
YER043C SAH1 S-adenosyl-L-homocysteine hydrolase, catabolizes S-adenosyl-L-homocysteine which is formed after donation of the activated methyl group of S-adenosyl-L-methionine (AdoMet) to an acceptor	173.7	304.3	214.4	454
YCL005W-A VMA9 Vacuolar H+ ATPase subunit e of the V0 (membrane) sector, essential for vacuolar acidification	381.4	252	474.6	378.6
YLR324W PEX30 Peroxisomal integral membrane protein, involved in negative regulation of peroxisome number; partially functionally redundant with Pex31p; genetic interactions suggest action at a step downstream of steps mediated by Pex28p and Pex29p	195.4	112.6	188.3	131
YCL014W BUD3 Protein involved in bud-site selection and required for axial budding pattern; localizes with septins to bud neck in mitosis and may constitute an axial landmark for next round of budding	8.9	10	7.3	9.9
YAR068W;YHR214W-A	134.1	99.4	19.9	17.8
YBR247C ENP1 Protein associated with U3 and U14 snoRNAs, required for pre-rRNA processing and 40S ribosomal subunit synthesis; localized in the nucleus and concentrated in the nucleolus	13.3	32.7	9	26.7
YGR143W SKN1 Protein involved in sphingolipid biosynthesis; type II membrane protein with similarity to Kre6p	79.2	102.7	45	70.4
YPR001W CIT3 Citrate synthase, catalyzes the condensation of acetyl coenzyme A and oxaloacetate to form citrate, mitochondrial isozyme involved in the TCA cycle	1228.6	846.7	1513.6	1258.3
YDR262W	53.8	77.7	86.1	150
YMR029C FAR8 Protein involved in G1 cell cycle arrest in response to pheromone, in a pathway different from the Far1p-dependent pathway; interacts with Far3p, Far7p, Far9p, Far10p, and Far11p	109.7	135.8	67.9	101.3
YAL017W PSK1 One of two (see also PSK2) PAS domain containing S/T protein kinases; coordinately regulates protein synthesis and carbohydrate metabolism and storage in response to a unknown metabolite that reflects nutritional status	79.2	53.1	20.3	16.4
YMR019W STB4 Protein that binds Sin3p in a two-hybrid assay; contains a Zn(II)2Cys6 zinc finger domain characteristic of DNA-binding proteins	23.4	24.6	6	7.6
YDR399W HPT1 Dimeric hypoxanthine-guanine phosphoribosyltransferase, catalyzes the formation of both inosine monophosphate and guanosine monophosphate; mutations in the human homolog HPRT1 can cause Lesch-Nyhan syndrome and Kelley-Seegmiller syndrome	164.8	244.7	21.8	39
YIR015W RPR2 Subunit of nuclear RNase P, which cleaves tRNA precursors to generate mature 5' ends; not shared between Rnase MRP and Rnase P, in contrast to all other Rnase P protein subunits	46.6	58.6	16.7	25.3
YGR225W AMA1 Activator of meiotic anaphase promoting complex (APC/C); Cdc20p family member; required for initiation of spore wall assembly; required for Clb1p degradation during meiosis	827.5	525.3	205	156.7
YJL089W SIP4 C6 zinc cluster transcriptional activator that binds to the carbon source-responsive element (CSRE) of gluconeogenic genes; involved in the positive regulation of gluconeogenesis; regulated by Snf1p protein kinase; localized to the nucleus	339.2	488	50	86.6
YDR107C	18	28.8	18.9	36.4
YKL010C UFD4 Ubiquitin-protein ligase (E3) that interacts with Rpt4p and Rpt6p, two subunits of the 19S particle of the 26S proteasome; cytoplasmic E3 involved in the degradation of ubiquitin fusion proteins	63.4	68.3	45.5	59
YIL011W TIR3 Cell wall mannoprotein of the Srp1p/Tip1p family of serine-alanine-rich proteins; expressed under anaerobic conditions and required for anaerobic growth	187	224.8	292.9	423.7
YDR143C SAN1 Ubiquitin-protein ligase, involved in the proteasome-dependent degradation of aberrant nuclear proteins; san1 mutations suppress sir4, spt16, and cdc68 mutations, suggesting a role in chromatin silencing	26	29	49.1	65.9
YDR404C RPB7 RNA polymerase II subunit B16; forms two subunit dissociable complex with Rpb4p	88.1	131.5	73.3	131.6
YER075C PTP3 Phosphotyrosine-specific protein phosphatase involved in the inactivation of mitogen-activated protein kinase (MAPK) during osmolarity sensing; dephosporylates Hog1p MAPK and regulates its localization; localized to the cytoplasm	26.6	16.5	18.9	14.1
YLR360W VPS38 Part of a Vps34p phosphatidylinositol 3-kinase complex that functions in carboxypeptidase Y (CPY) sorting; binds Vps30p and Vps34p to promote production of phosphatidylinositol 3-phosphate (PtdIns3P) which stimulates kinase activity	27.2	46.9	9.5	19.7
YFL018C LPD1 Dihydrolipoamide dehydrogenase, the lipoamide dehydrogenase component (E3) of the pyruvate dehydrogenase and 2-oxoglutarate dehydrogenase multi-enzyme complexes	359.8	389.5	558.5	727.1
YFR028C CDC14 Protein phosphatase required for mitotic exit; located in the nucleolus until liberated by the FEAR and Mitotic Exit Network in anaphase, enabling it to act on key substrates to effect a decrease in CDK/B-cyclin activity and mitotic exit	102.8	117	39.6	54.2
YKL165C MCD4 Protein involved in glycosylphosphatidylinositol (GPI) anchor synthesis; multimembrane-spanning protein that localizes to the endoplasmic reticulum; highly conserved among eukaryotes	22.3	29.1	25.3	39.7
YOR317W FAA1 Long chain fatty acyl-CoA synthetase with a preference for C12:0-C16:0 fatty acids; involved in the activation of imported fatty acids; not required for growth on nonfermentable carbon sources; essential for stationary phase	762.5	998.6	1010.3	1590.7
YER154W OXA1 Translocase of the mitochondrial inner membrane, mediates the insertion of both mitochondrial- and nuclear-encoded proteins from the matrix into the inner membrane, interacts with mitochondrial ribosomes; null is respiratory deficient	12.3	12.2	10.4	12.4
YHR176W FMO1 Flavin-containing monooxygenase, localized to the cytoplasmic face of the ER membrane; catalyzes oxidation of biological thiols to maintain the ER redox buffer ratio for correct folding of disulfide-bonded proteins	39.1	47.8	32.6	47.9
YPR162C ORC4 Subunit of the origin recognition complex, which directs DNA replication by binding to replication origins and is also involved in transcriptional silencing	29.4	27.5	13.7	15.4
YLR015W BRE2 Subunit of the COMPASS (Set1C) complex, which methylates histone H3 on lysine 4 and is required in transcriptional silencing near telomeres; has similarity to the trithorax-group protein ASH2L	69.5	67.8	27.3	32
YDL171C GLT1 NAD(+)-dependent glutamate synthase (GOGAT), synthesizes glutamate from glutamine and alpha-ketoglutarate; with Gln1p, forms the secondary pathway for glutamate biosynthesis from ammonia; expression regulated by nitrogen source	179.2	125.9	174.4	147.2
YEL029C BUD16 Protein involved in bud-site selection; diploid mutants display a random budding pattern instead of the wild-type bipolar pattern; has similarity to pyridoxal kinases	14.4	37.7	6.2	19.5
YDL218W	14.6	14.4	7.6	9
YPL034W	38	51.2	3.4	5.5
YDR129C SAC6 Fimbrin, actin-bundling protein; cooperates with Scp1p (calponin/transgelin) in the organization and maintenance of the actin cytoskeleton	217.2	164.1	196.5	178.2
YKR106W	2.6	5.2	0.5	1.2
YGL060W YBP2 Protein with a role in resistance to oxidative stress; has similarity to Ybp1p, which is involved in regulation of the transcription factor Yap1p via oxidation of specific cysteine residues	30.1	28.8	32.4	37.2
YJL129C TRK1 Component of the Trk1p-Trk2p potassium transport system; 180 kDa high affinity potassium transporter	27.4	39	6.5	11.1
YGR085C;YPR102C	331.5	820.5	86.1	255.5
YNL139C RLR1 Subunit of the THO complex, which is required for efficient transcription elongation and involved in transcriptional elongation-associated recombination; required for LacZ RNA expression from certain plasmids	23.7	24.3	19.2	23.6
YGL197W MDS3 Protein with an N-terminal kelch-like domain, putative negative regulator of early meiotic gene expression; required, with Pmd1p, for growth under alkaline conditions	44.3	38.7	42.4	44.4
YLR397C AFG2 ATPase of the CDC48/PAS1/SEC18 (AAA) family, forms a hexameric complex; may be involved in degradation of aberrant mRNAs	16.9	23.2	11	18.1
YOL063C HUS1 Protein required for normal hydroxyurea resistance; not related to the HUS1 checkpoint protein identified in human and fission yeast	14.8	16.3	5	6.6
YNR038W DBP6 Essential protein involved in ribosome biogenesis; putative ATP-dependent RNA helicase of the DEAD-box protein family	8.6	18.8	6.3	16.5
YCL032W STE50 Protein involved in mating response, invasive/filamentous growth, and osmotolerance, acts as an adaptor that links G protein-associated Cdc42p-Ste20p complex to the effector Ste11p to modulate signal transduction	54.8	81.1	32.6	57.8
YMR066W SOV1 Mitochondrial protein of unknown function	20.8	28.1	5.5	8.9
YHR087W	147.7	201.8	60.8	99.5
YER094C PUP3 Beta subunit of the 20S proteasome involved in ubiquitin-dependent catabolism; human homolog is subunit C10	579.5	912.5	480.6	906.4
YHR206W SKN7 Nuclear response regulator and transcription factor, part of a branched two-component signaling system; required for optimal induction of heat-shock genes in response to oxidative stress; involved in osmoregulation	27.6	28.3	11.4	14
YDR062W LCB2 Component of serine palmitoyltransferase, responsible along with Lcb1p for the first committed step in sphingolipid synthesis, which is the condensation of serine with palmitoyl-CoA to form 3-ketosphinganine	194.7	213.2	148.4	194.6
YKR063C LAS1 Essential nuclear protein possibly involved in bud formation and morphogenesis; mutants require the SSD1-v allele for viability	19	43.5	5.8	15.9
YOR196C LIP5 Protein involved in biosynthesis of the coenzyme lipoic acid, has similarity to E. coli lipoic acid synthase	98.1	123.3	53.3	80.2
YJL047C-A	826.1	869.7	7.3	9.2
YNL240C NAR1 Nuclear architecture related protein; component of the cytosolic iron-sulfur (FeS) protein assembly machinery, required for maturation of cytosolic and nuclear FeS proteins; homologous to human Narf	20.4	33.7	8.9	17.6
YHL027W RIM101 Transcriptional repressor involved in the response to pH; required for alkaline pH-stimulated differentiation pathways such as haploid invasive growth and sporulation; activated by proteolytic processing; has similarity to the A. nidulans transcription factor PacC	160.8	148.3	184.7	203.9
YOR030W DFG16 Probable multiple transmembrane protein, involved in invasive growth upon nitrogen starvation; required for accumulation of processed Rim101p	26.1	41.1	15.6	29.4
YMR253C	28.1	38.5	23.3	38.2
YMR306W FKS3 Protein of unknown function, has similarity to 1,3-beta-D-glucan synthase catalytic subunits Fks1p and Gsc2p	167	205.1	271.8	399.3
YAL013W DEP1 Transcriptional modulator involved in the regulation of structural genes involved in phospholipid biosynthesis, also participates in regulation of metabolically unrelated genes as well as maintenance of mating efficiency and sporulation	41	40.8	55.7	66.3
YPR002W PDH1 Mitochondrial protein that participates in respiration, induced by diauxic shift; homologous to E. coli PrpD, may take part in the conversion of 2-methylcitrate to 2-methylisocitrate	872.9	1495.3	1266.4	2594.8
YGL101W	63.9	101.1	31.4	59.4
YGR068C	8.2	14.1	5.4	11.1
YKL004W AUR1 Phosphatidylinositol:ceramide phosphoinositol transferase (IPC synthase), required for sphingolipid synthesis; can mutate to confer aureobasidin A resistance	66.7	68.9	49.4	61
YLR027C AAT2 Cytosolic aspartate aminotransferase, involved in nitrogen metabolism; localizes to peroxisomes in oleate-grown cells	290.2	304.2	412.3	516.5
YNL277W MET2 L-homoserine-O-acetyltransferase, catalyzes the conversion of homoserine to O-acetyl homoserine which is the first step of the methionine biosynthetic pathway	55.3	49.5	58	62
YBR214W SDS24 One of two S. cerevisiae homologs (Sds23p and Sds24p) of the Schizosaccharomyces pombe Sds23 protein, which genetic studies have implicated in APC/cyclosome regulation; may play an indirect role in fluid-phase endocytosis	147.7	108.2	197.1	172.4
YLR321C SFH1 Subunit of the RSC chromatin remodeling complex required for kinetochore function in chromosome segregation; essential gene required for cell cycle progression; phosphorylated in the G1 phase of the cell cycle; Snf5p paralog	26.6	35.5	23.6	37.6
YIL026C IRR1 Subunit of the cohesin complex, which is required for sister chromatid cohesion during mitosis and meiosis and interacts with centromeres and chromosome arms, essential for viability	137.9	141.1	117.5	143.5
YLR244C MAP1 Methionine aminopeptidase, catalyzes the cotranslational removal of N-terminal methionine from nascent polypeptides; function is partially redundant with that of Map2p	143.6	103.8	62.6	54
YJR076C CDC11 Component of the septin ring of the mother-bud neck that is required for cytokinesis; septins recruit proteins to the neck and can act as a barrier to diffusion at the membrane, and they comprise the 10nm filaments seen with EM	83.1	103	54.9	81.2
YGR016W	62	64.1	79.6	98.2
YHR083W SAM35 Essential component of the sorting and assembly machinery (SAM complex or TOB complex) of the mitochondrial outer membrane, which binds precursors of beta-barrel proteins and facilitates their insertion into the outer membrane	16.3	27.2	11.3	22.5
YMR158W MRPS8 Mitochondrial ribosomal protein of the small subunit	34.6	37.9	15	19.6
YCR073W-A SOL2 Protein with a possible role in tRNA export; shows similarity to 6-phosphogluconolactonase non-catalytic domains but does not exhibit this enzymatic activity; homologous to Sol1p, Sol3p, and Sol4p	65.9	62.2	78.7	88.6
YMR241W YHM2 Mitochondrial DNA-binding protein, component of the mitochondrial nucleoid structure, involved in mtDNA replication and segregation of mitochondrial genomes; member of the mitochondrial carrier protein family	186.4	247.7	93	147.4
YJL155C FBP26 Fructose-2,6-bisphosphatase, required for glucose metabolism	453.1	300.3	157.4	124.4
YLR437C	204.9	134.6	322	252.2
YNL027W CRZ1 Transcription factor that activates transcription of genes involved in stress response; nuclear localization is positively regulated by calcineurin-mediated dephosphorylation	53.8	33.2	59.3	43.6
YMR083W ADH3 Mitochondrial alcohol dehydrogenase isozyme III; involved in the shuttling of mitochondrial NADH to the cytosol under anaerobic conditions and ethanol production	301.1	174.2	335.7	231.4
YDR464W SPP41 Protein involved in negative regulation of expression of spliceosome components PRP4 and PRP3	56.4	48.7	34.9	35.9
YJL149W	117.1	148.7	140.3	212.2
YGR172C YIP1 Integral membrane protein required for the biogenesis of ER-derived COPII transport vesicles; interacts with Yif1p and Yos1p; localizes to the Golgi, the ER, and COPII vesicles	42.1	56.7	46.7	74.9
YPR196W	7.5	9.7	5	7.7
YNR022C MRPL50 Mitochondrial ribosomal protein of the large subunit, not essential for mitochondrial translation	81.5	74.2	61.9	67.1
YHR096C HXT5 Hexose transporter with moderate affinity for glucose, may function in accumulation of reserve carbohydrates during stress, expression induced by a decrease in growth rate, contains an extended N-terminal domain relative to other HXTs	774.6	557.4	333.8	285.8
YHR162W	519	595.2	181.9	248.2
YKL014C URB1 Nucleolar protein required for the normal accumulation of 25S and 5.8S rRNAs, associated with the 27SA2 pre-ribosomal particle; proposed to be involved in the biogenesis of the 60S ribosomal subunit	8.3	16.1	2.6	6
YDL101C DUN1 Cell-cycle checkpoint serine-threonine kinase required for DNA damage-induced transcription of certain target genes, phosphorylation of Rad55p and Sml1p, and transient G2/M arrest after DNA damage; also regulates postreplicative DNA repair	28	52.4	21.7	48.3
YGL151W NUT1 Component of the RNA polymerase II mediator complex, which is required for transcriptional activation and also has a role in basal transcription	19	22.7	10.7	15.2
YDL048C STP4 Protein containing a Kruppel-type zinc-finger domain; has similarity to Stp1p, Stp2p, and Stp3p	27.1	49.9	7.4	16.2
YJL203W PRP21 Subunit of the SF3a splicing factor complex, required for spliceosome assembly	36.3	45.5	31.9	47.5
YKL211C TRP3 Bifunctional enzyme exhibiting both indole-3-glycerol-phosphate synthase and anthranilate synthase activities, forms multifunctional hetero-oligomeric anthranilate synthase:indole-3-glycerol phosphate synthase enzyme complex with Trp2p	39.5	61.9	41.9	78
YOR254C SEC63 Essential subunit of Sec63 complex (Sec63p, Sec62p, Sec66p and Sec72p); with Sec61 complex, Kar2p/BiP and Lhs1p forms a channel competent for SRP-dependent and post-translational SRP-independent protein targeting and import into the ER	106.6	135.4	69	104.1
YGL131C SNT2 DNA binding protein with similarity to the S. pombe Snt2 protein	20	20.3	10.7	12.9
YMR304W UBP15 Ubiquitin-specific protease that may play a role in ubiquitin precursor processing	70.7	65.3	99.3	108.9
YLR435W TSR2 Protein with a potential role in pre-rRNA processing	23.3	54.7	9.4	26.2
YKL008C LAC1 Ceramide synthase component, involved in synthesis of ceramide from C26(acyl)-coenzyme A and dihydrosphingosine or phytosphingosine, functionally equivalent to Lag1p	48.6	80.6	22.1	43.5
YOR261C RPN8 Essential, non-ATPase regulatory subunit of the 26S proteasome; has similarity to the human p40 proteasomal subunit and to another S. cerevisiae regulatory subunit, Rpn11p	1116	1314.2	352.3	492.3
YJL178C ATG27 Type II membrane protein that binds phosphatidylinositol 3-phosphate, required for the cytoplasm-to-vacuole targeting (Cvt) pathway	147.7	211.1	152.6	258.7
YJL074C SMC3 Subunit of the multiprotein cohesin complex required for sister chromatid cohesion in mitotic cells; also required, with Rec8p, for cohesion and recombination during meiosis; phylogenetically conserved SMC chromosomal ATPase family member	111.9	124.4	100.7	132.7
YNL230C ELA1 Elongin A, F-box protein that forms a heterodimer with Elc1p and participates in transcription elongation	41.4	43.5	11	13.7
YOR023C AHC1 Subunit of the Ada histone acetyltransferase complex, required for structural integrity of the complex	53.1	53.6	35.7	42.7
YKL187C	23.5	33.4	15.5	26.1
YIL118W RHO3 Non-essential small GTPase of the Rho/Rac subfamily of Ras-like proteins involved in the establishment of cell polarity; GTPase activity positively regulated by the GTPase activating protein (GAP) Rgd1p	34.3	78.4	19.5	52.8
YML057W CMP2 Calcineurin A; one isoform (the other is CNA1) of the catalytic subunit of calcineurin, a Ca++/calmodulin-regulated protein phosphatase which regulates Crz1p (a stress-response transcription factor), the other calcineurin subunit is CNB1	75.7	67	78.2	81.9
YOR176W HEM15 Ferrochelatase, a mitochondrial inner membrane protein, catalyzes the insertion of ferrous iron into protoporphyrin IX, the eighth and final step in the heme biosynthetic pathway; Yfh1p mediates the use of iron by Hem15p	120.9	132.8	183.5	238.4
YGR133W PEX4 Peroxisomal ubiquitin conjugating enzyme required for peroxisomal matrix protein import and peroxisome biogenesis	16.3	21.9	20.2	32.1
YMR041C	61.5	72.6	53.6	74.8
YMR238W DFG5 Putative mannosidase, essential glycosylphosphatidylinositol (GPI)-anchored membrane protein required for cell wall biogenesis in bud formation, involved in filamentous growth, homologous to Dcw1p	250.2	240	232.2	263.3
YKL176C LST4 Protein possibly involved in a post-Golgi secretory pathway; required for the transport of nitrogen-regulated amino acid permease Gap1p from the Golgi to the cell surface	38.6	71	9.8	21.3
YOR227W	33.4	32.8	20.6	23.9
YBR029C CDS1 Phosphatidate cytidylyltransferase (CDP-diglyceride synthetase); an enzyme that catalyzes that conversion of CTP + phosphate into diphosphate + CDP-diaclglyerol, a critical step in the synthesis of all major yeast phospholipids	17.7	66.3	12.7	56.2
YOR071C	18.9	27.2	8	13.6
YFL046W FMP32 The authentic, non-tagged protein was localized to the mitochondria	98.1	104.7	86.3	108.8
YHR072W ERG7 Lanosterol synthase, an essential enzyme that catalyzes the cyclization of squalene 2,3-epoxide, a step in ergosterol biosynthesis	49.7	75.3	24.2	43.3
YHR168W MTG2 Putative GTPase, member of the Obg family; peripheral protein of the mitochondrial inner membrane that associates with the large ribosomal subunit; required for mitochondrial translation, possibly via a role in ribosome assembly	14.7	19	13.7	20.9
YGL135W;YPL220W	489.2	1111.9	114.9	308.2
YKL119C VPH2 Integral membrane protein required for vacuolar H+-ATPase (V-ATPase) function, although not an actual component of the V-ATPase complex; functions in the assembly of the V-ATPase; localized to the endoplasmic reticulum (ER)	22.2	39.3	7.9	16.5
YPL144W	25.2	70.1	7.1	23.3
YOR004W	48.2	67.3	18.7	30.8
YDR154C	279.8	641.3	15.5	41.9
YNL222W SSU72 Transcription/RNA-processing factor that associates with TFIIB and cleavage/polyadenylation factor Pta1p, exhibits intrinsic phosphatase activity, affects start site selection in vivo	123.9	138.8	115.2	152.1
YNL273W TOF1 Subunit of a replication-pausing checkpoint complex (Tof1p-Mrc1p-Csm3p) that acts at the stalled replication fork to promote sister chromatid cohesion after DNA damage, facilitating gap repair of damaged DNA; interacts with the MCM helicase	8.2	15	4.5	9.7
YGR197C SNG1 Protein involved in nitrosoguanidine (MNNG) resistance; expression is regulated by transcription factors involved in multidrug resistance	27	43	25.9	48.6
YBR176W ECM31 Ketopantoate hydroxymethyltransferase, required for pantothenic acid biosynthesis, converts 2-oxoisovalerate into 2-dehydropantoate	16.3	25.3	6.4	11.7
YML048W GSF2 ER localized integral membrane protein that may promote secretion of certain hexose transporters, including Gal2p; involved in glucose-dependent repression	140.8	169.2	74.9	106
YBR041W FAT1 Fatty acid transporter and very long-chain fatty acyl-CoA synthetase, may form a complex with Faa1p or Faa4p that imports and activates exogenous fatty acids	90	107	92.4	129.3
YNL326C PFA3 Palmitoyltransferase for Vac8p, required for vacuolar membrane fusion; contains an Asp-His-His-Cys-cysteine rich (DHHC-CRD) domain; autoacylates; required for vacuolar integrity under stress conditions	36	29.3	18.9	18.1
YJL128C PBS2 MAP kinase kinase that plays a pivotal role in the osmosensing signal-transduction pathway, activated under severe osmotic stress	33.6	39.8	32.3	45
YOR162C YRR1 Zn2-Cys6 zinc-finger transcription factor that activates genes involved in multidrug resistance; paralog of Yrm1p, acting on an overlapping set of target genes	31.2	32.9	37.9	47
YER003C PMI40 Mannose-6-phosphate isomerase, catalyzes the interconversion of fructose-6-P and mannose-6-P; required for early steps in protein mannosylation	218.2	215.5	591.5	687
YCL044C MGR1 Subunit, with Yme1p, of the mitochondrial inner membrane i-AAA protease complex, which is responsible for degradation of unfolded or misfolded mitochondrial gene products; required for growth of cells lacking the mitochondrial genome	22.9	31.6	95.7	155.3
YMR053C STB2 Protein that interacts with Sin3p in a two-hybrid assay and is part of a large protein complex with Sin3p and Stb1p	50.1	36.4	26.1	22.3
YHR204W MNL1 Alpha mannosidase-like protein of the endoplasmic reticulum required for degradation of glycoproteins but not for processing of N-linked oligosaccharides	12	26.1	3.6	9.2
YEL051W VMA8 Subunit D of the eight-subunit V1 peripheral membrane domain of the vacuolar H+-ATPase (V-ATPase), an electrogenic proton pump found throughout the endomembrane system; plays a role in the coupling of proton transport and ATP hydrolysis	117.8	133.4	75.4	100.3
YDL035C GPR1 Plasma membrane G protein coupled receptor (GPCR) that interacts with the heterotrimeric G protein alpha subunit, Gpa2p, and with Plc1p; sensor that integrates nutritional signals with the modulation of cell fate via PKA and cAMP synthesis	67.1	77.7	21.1	28.7
YKL068W NUP100 Subunit of the nuclear pore complex (NPC) that is localized to both sides of the pore; contains a repetitive GLFG motif that interacts with mRNA export factor Mex67p and with karyopherin Kap95p; homologous to Nup116p	10.9	15.1	12.6	20.5
YLL018C DPS1 Cytoplasmic aspartyl-tRNA synthetase, homodimeric enzyme that catalyzes the specific aspartylation of tRNA(Asp); class II aminoacyl tRNA synthetase; binding to its own mRNA may confer autoregulation	86.6	87.5	166.8	197.8
YER107C GLE2 Component of the nuclear pore complex required for polyadenylated RNA export but not for protein import, homologous to S. pombe Rae1p	118.3	90.4	100.8	90.4
YDL180W	69.6	62.2	22.8	23.9
YFR006W	85.2	86.3	56.4	67
YKL155C RSM22 Mitochondrial ribosomal protein of the small subunit	15.9	18.3	10.3	13.9
YPL009C	48.6	59.9	20	28.9
YCR018C-A	95.3	124.2	11.4	17.4
YHL001W;YKL006W	592.8	1380.1	167.4	456.4
YFL044C YOD1 Protein of unknown function, proposed to act as a deubiquitinating (DUB) enzyme and/or transcription factor; contains a C2H2-type DNA-binding Zn finger domain; has similarity to the ovarian tumor (OTU) superfamily of cysteine proteases	151.3	233.6	243	439.3
YKL103C LAP4 Vacuolar aminopeptidase, often used as a marker protein in studies of autophagy and cytosol to vacuole targeting (CVT) pathway	91	113.5	167.7	244.9
YIL002C INP51 Phosphatidylinositol 4,5-bisphosphate 5-phosphatase, synaptojanin-like protein with an N-terminal Sac1 domain, plays a role in phosphatidylinositol 4,5-bisphosphate homeostasis and in endocytosis; null mutation confers cold-tolerant growth	31.1	29.8	11.5	12.9
YOR324C FRT1 Tail-anchored endoplasmic reticulum membrane protein that is a substrate of the phosphatase calcineurin, interacts with homolog Frt2p, promotes cell growth in conditions of high Na+, alkaline pH, and cell wall stress	32	34.7	18.2	23.1
YGR088W CTT1 Cytosolic catalase T, has a role in protection from oxidative damage by hydrogen peroxide	29.5	35.9	3.3	4.7
YKL140W TGL1 Steryl ester hydrolase, one of three gene products (Yeh1p, Yeh2p, Tgl1p) responsible for steryl ester hydrolase activity and involved in sterol homeostasis; localized to lipid particle membranes	116.7	122.7	89.2	109.7
YDL054C MCH1 Protein with similarity to mammalian monocarboxylate permeases, which are involved in transport of monocarboxylic acids across the plasma membrane; mutant is not deficient in monocarboxylate transport	359.9	439.6	518.9	741.3
YMR136W GAT2 Protein containing GATA family zinc finger motifs; similar to Gln3p and Dal80p; expression repressed by leucine	143.7	193.3	162	254.8
YER093C TSC11 Subunit of TORC2 (Tor2p-Lst8p-Avo1-Avo2-Tsc11p-Bit61p), a membrane-associated complex that regulates actin cytoskeletal dynamics during polarized growth and cell wall integrity; involved in sphingolipid metabolism; contains a RasGEFN domain	12.8	13.1	5.6	6.7
YJL002C OST1 Alpha subunit of the oligosaccharyltransferase complex of the ER lumen, which catalyzes asparagine-linked glycosylation of newly synthesized proteins	148.4	205.7	139.2	225.4
YFL048C EMP47 Integral membrane component of endoplasmic reticulum-derived COPII-coated vesicles, which function in ER to Golgi transport	58.4	38.9	32	24.9
YGR085C RPL11B Protein component of the large (60S) ribosomal subunit, nearly identical to Rpl11Ap; involved in ribosomal assembly; depletion causes degradation of proteins and RNA of the 60S subunit; has similarity to E. coli L5 and rat L11	258.9	484.2	106.6	232.7
YDL185W TFP1 Vacuolar ATPase V1 domain subunit A containing the catalytic nucleotide binding sites; protein precursor undergoes self-catalyzed splicing to yield the extein Tfp1p and the intein Vde (PI-SceI), which is a site-specific endonuclease	245.7	352.4	231.9	388.2
YMR317W	0.6	0.4	0.9	0.7
YBR053C	107.6	169.3	84.5	155.1
YMR077C VPS20 Myristoylated subunit of ESCRTIII, the endosomal sorting complex required for transport of transmembrane proteins into the multivesicular body pathway to the lysosomal/vacuolar lumen; cytoplasmic protein recruited to endosomal membranes	97.3	110.9	52.8	70.2
YFR010W UBP6 Ubiquitin-specific protease situated in the base subcomplex of the 26S proteasome, releases free ubiquitin from branched polyubiquitin chains; deletion causes hypersensitivity to cycloheximide and other toxic compounds	281.7	350.5	348.8	506.2
YIL125W KGD1 Component of the mitochondrial alpha-ketoglutarate dehydrogenase complex, which catalyzes a key step in the tricarboxylic acid (TCA) cycle, the oxidative decarboxylation of alpha-ketoglutarate to form succinyl-CoA	391.1	255.7	657.2	501.1
YIR023W DAL81 Positive regulator of genes in multiple nitrogen degradation pathways; contains DNA binding domain but does not appear to bind the dodecanucleotide sequence present in the promoter region of many genes involved in allantoin catabolism	9.1	14.8	2.9	5.5
YJL201W ECM25 Non-essential protein of unknown function; promoter contains a consensus binding sequence for factor Abf1p	26.9	32.5	15.9	22.4
YOR080W DIA2 Protein of unknown function, involved in invasive and pseudohyphal growth	34.9	44	13	19.1
YMR296C LCB1 Component of serine palmitoyltransferase, responsible along with Lcb2p for the first committed step in sphingolipid synthesis, which is the condensation of serine with palmitoyl-CoA to form 3-ketosphinganine	51.1	68.8	64.5	101.2
YIL111W COX5B Subunit Vb of cytochrome c oxidase, which is the terminal member of the mitochondrial inner membrane electron transport chain; predominantly expressed during anaerobic growth while its isoform Va (Cox5Ap) is expressed during aerobic growth	180.6	195.8	42.6	53.8
YLR071C RGR1 Component of RNA polymerase II holoenzyme/mediator complex; affects chromatin structure and transcriptional regulation of diverse genes; required for glucose repression, HO repression, RME1 repression and sporulation	27.3	27.3	17	19.8
YMR092C AIP1 Actin cortical patch component, interacts with the actin depolymerizing factor cofilin; required to restrict cofilin localization to cortical patches; contains WD repeats	87.7	122.2	75.8	123
YDR151C CTH1 Member of the CCCH zinc finger family; has similarity to mammalian Tis11 protein, which activates transcription and also has a role in mRNA degradation; may function with Tis11p in iron homeostasis	30.3	44.5	47.5	81.2
YOL048C	247	282.2	125.2	166.4
YMR199W CLN1 G1 cyclin involved in regulation of the cell cycle; activates Cdc28p kinase to promote the G1 to S phase transition; late G1 specific expression depends on transcription factor complexes, MBF (Swi6p-Mbp1p) and SBF (Swi6p-Swi4p)	3.8	7	0.7	1.5
YPR010C-A	1527.9	1709.2	1531.7	1993
YLR287C-A RPS30A Protein component of the small (40S) ribosomal subunit; nearly identical to Rps30Bp and has similarity to rat S30 ribosomal protein	443.2	1327.8	275.8	960.9
YLR291C GCD7 Beta subunit of the translation initiation factor eIF2B, the guanine-nucleotide exchange factor for eIF2; activity subsequently regulated by phosphorylated eIF2; first identified as a negative regulator of GCN4 expression	28.6	52.9	20.7	44.5
YMR206W	215.6	253.2	135	184.2
YNL279W PRM1 Pheromone-regulated multispanning membrane protein involved in membrane fusion during mating; predicted to have 5 transmembrane segments and a coiled coil domain; localizes to the shmoo tip; regulated by Ste12p	7.9	10.2	0.6	0.9
YAL005C SSA1 ATPase involved in protein folding and nuclear localization signal (NLS)-directed nuclear transport; member of heat shock protein 70 (HSP70) family; forms a chaperone complex with Ydj1p; localized to the nucleus, cytoplasm, and cell wall	2213.1	2235	4794.2	5624.3
YIL056W VHR1 Putative protein of unknown function; green fluorescent protein (GFP)-fusion protein localizes to the cytoplasm and nucleus	18.4	18.4	13	15.1
YMR243C ZRC1 Vacuolar membrane zinc transporter, transports zinc from the cytosol into the vacuole for storage; also has a role in resistance to zinc shock resulting from a sudden influx of zinc into the cytoplasm	81.1	90.3	43	55.6
YDR505C PSP1 Asn and gln rich protein of unknown function; high-copy suppressor of POL1 (DNA polymerase alpha) and partial suppressor of CDC2 (polymerase delta) and CDC6 (pre-RC loading factor) mutations; overexpression results in growth inhibition	255.6	148.4	181.7	122.5
YKL122C SRP21 Subunit of the signal recognition particle (SRP), which functions in protein targeting to the endoplasmic reticulum membrane; not found in mammalian SRP; forms a pre-SRP structure in the nucleolus that is translocated to the cytoplasm	130.4	139.7	33.2	41.3
YOR356W	68.7	104.7	74.1	131.1
YDR458C	25	38.3	4.5	8
YML070W DAK1 Dihydroxyacetone kinase, required for detoxification of dihydroxyacetone (DHA); involved in stress adaptation	128.2	176.7	200.2	319.9
YMR225C MRPL44 Mitochondrial ribosomal protein of the large subunit	19.1	36.9	30.9	69.2
YLR396C VPS33 ATP-binding protein that is a subunit of the homotypic vacuole fusion and vacuole protein sorting (HOPS) complex; essential for membrane docking and fusion at both the Golgi-to-endosome and endosome-to-vacuole stages of protein transport	29.2	37.2	21.2	31.3
YER090W TRP2 Anthranilate synthase, catalyzes the initial step of tryptophan biosynthesis, forms multifunctional hetero-oligomeric anthranilate synthase:indole-3-glycerol phosphate synthase enzyme complex with Trp3p	21.5	36.2	22.5	43.9
YHR047C AAP1' Arginine/alanine aminopeptidase, overproduction stimulates glycogen accumulation	26.9	27.8	30.4	36.4
YIL083C	77.7	101.6	53.8	81.5
YBL105C PKC1 Protein serine/threonine kinase essential for cell wall remodeling during growth; localized to sites of polarized growth and the mother-daughter bud neck; homolog of the alpha, beta, and gamma isoforms of mammalian protein kinase C (PKC)	52.1	52.2	46.9	54.4
YLR019W PSR2 Functionally redundant Psr1p homolog, a plasma membrane phosphatase involved in the general stress response; required with Psr1p and Whi2p for full activation of STRE-mediated gene expression, possibly through dephosphorylation of Msn2p	46.3	93.7	26	60.9
YOR375C GDH1 NADP(+)-dependent glutamate dehydrogenase, synthesizes glutamate from ammonia and alpha-ketoglutarate; rate of alpha-ketoglutarate utilization differs from Gdh3p; expression regulated by nitrogen and carbon sources	380.9	674.2	407.2	834.2
YPL207W	126.9	130.9	49	58.5
YOR154W	24.9	41.7	8.1	15.7
YJL154C VPS35 Endosomal protein that is a subunit of the membrane-associated retromer complex essential for endosome-to-Golgi retrograde transport; forms a subcomplex with Vps26p and Vps29p that selects cargo proteins for endosome-to-Golgi retrieval	51.3	59.6	35.7	48
YDR286C	31.4	29.7	10.6	11.6
YDR016C DAD1 Essential protein, component of the DASH complex, involved in spindle integrity and kinetochore function; interacts with Duo1p and Dam1p; localizes to intranuclear spindles and kinetochore	136.3	200	71.7	121.7
YGR105W VMA21 Integral membrane protein that is required for vacuolar H+-ATPase (V-ATPase) function, although not an actual component of the V-ATPase complex; functions in the assembly of the V-ATPase; localized to the yeast endoplasmic reticulum (ER)	170.1	202.7	225	310
YGR134W CAF130 Part of the evolutionarily-conserved CCR4-NOT transcriptional regulatory complex involved in controlling mRNA initiation, elongation, and degradation	28.1	31.8	10.7	14
YML009C MRPL39 Mitochondrial ribosomal protein of the large subunit	104.1	102.5	129.4	147.3
YGR142W BTN2 Cytosolic coiled-coil protein that modulates arginine uptake, interacts with Rhb1p, possible role in mediating pH homeostasis between the vacuole and plasma membrane H(+)-ATPase, may have a role in intracellular protein trafficking	302.4	379.9	165.1	239.7
YMR226C	216.4	339.8	214.5	389.1
YLR080W EMP46 Integral membrane component of endoplasmic reticulum-derived COPII-coated vesicles, which function in ER to Golgi transport	44.1	41	33.9	36.4
YER163C	53.7	95.7	25.9	53.3
YDL126C CDC48 ATPase in ER, nuclear membrane and cytosol with homology to mammalian p97; in a complex with Npl4p and Ufd1p participates in retrotranslocation of ubiquitinated proteins from the ER into the cytosol for degradation by the proteasome	527.2	858.6	792.4	1490.2
YHR030C SLT2 Serine/threonine MAP kinase involved in regulating the maintenance of cell wall integrity and progression through the cell cycle; regulated by the PKC1-mediated signaling pathway	210.8	213.1	54.4	63.5
YDL071C	10.8	18.9	9.7	19.6
YJR061W	33.9	32	7.8	8.5
YJL019W MPS3 Essential integral membrane protein required for spindle pole body duplication and for nuclear fusion, localizes to the spindle pole body half bridge, interacts with DnaJ-like chaperone Jem1p and with centrin homolog Cdc31p	34	47.3	80.2	128.8
YJR108W ABM1 Protein of unknown function, required for normal microtubule organization	17	20.8	27.4	38.7
YHR101C BIG1 Integral membrane protein of the endoplasmic reticulum, required for normal content of cell wall beta-1,6-glucan	89.9	91.6	69.4	81.6
YKL150W MCR1 Mitochondrial NADH-cytochrome b5 reductase, involved in ergosterol biosynthesis	336.7	456.2	257.4	402.2
YPL095C EEB1 Acyl-coenzymeA:ethanol O-acyltransferase responsible for the major part of short-chain fatty acid ethyl ester production during fermentation	38.7	44.2	31.6	41.6
YOR021C	96	163.2	76.3	149.5
YDR099W BMH2 14-3-3 protein, minor isoform; binds proteins and DNA, involved in regulation of many processes including exocytosis and vesicle transport, Ras/MAPK signaling during pseudohyphal development, rapamycin-sensitive signaling, and others	1440.8	1675.1	2653.1	3554.6
YPR016C TIF6 Constituent of 66S pre-ribosomal particles, has similarity to human translation initiation factor 6 (eIF6); may be involved in the biogenesis and or stability of 60S ribosomal subunits	134.7	180.1	115.6	178.1
YJL186W MNN5 Alpha-1,2-mannosyltransferase, responsible for addition of the second alpha-1,2-linked mannose of the branches on the mannan backbone of oligosaccharides, localizes to an early Golgi compartment	43.9	73.6	30.8	59.5
YER053C PIC2 Mitochondrial phosphate carrier, imports inorganic phosphate into mitochondria; functionally redundant with Mir1p but less abundant than Mir1p under normal conditions; expression is induced at high temperature	38.8	107.8	16.9	54.1
YNL181W	102.4	149.8	72.8	122.7
YOR108W LEU9 Alpha-isopropylmalate synthase II (2-isopropylmalate synthase), catalyzes the first step in the leucine biosynthesis pathway; the minor isozyme, responsible for the residual alpha-IPMS activity detected in a leu4 null mutant	21.4	49.4	22.9	60.9
YNL263C YIF1 Integral membrane protein required for the fusion of ER-derived COPII transport vesicles with the Golgi; interacts with Yip1p and Yos1p; localizes to the Golgi, the ER, and COPII vesicles	56.6	85.2	43.6	75.6
YBL092W RPL32 Protein component of the large (60S) ribosomal subunit, has similarity to rat L32 ribosomal protein; overexpression disrupts telomeric silencing	322.3	672.5	110.6	265.8
YPL265W DIP5 Dicarboxylic amino acid permease, mediates high-affinity and high-capacity transport of L-glutamate and L-aspartate; also a transporter for Gln, Asn, Ser, Ala, and Gly	581.4	320.7	655.9	416.7
YBR219C;YBR220C	14.9	35.9	4	11.1
YNR002C ATO2 Putative transmembrane protein, involved in the export of ammonia, a starvation signal that promotes cell death in the center of aging colonies; member of the TC 9.B.33 YaaH family; homolog of Ady2p and Y. lipolytica Gpr1p	122.3	100.5	156.6	148.2
YPL221W HUF1 Protein involved in outer chain mannosylation, overexpression stimulates uptake of hemin	23.4	21	9	9.3
YAL044C GCV3 H subunit of the mitochondrial glycine decarboxylase complex, required for the catabolism of glycine to 5,10-methylene-THF; expression is regulated by levels of levels of 5,10-methylene-THF in the cytoplasm	621.4	820.3	711.8	1081.9
YOR372C NDD1 Transcriptional activator essential for nuclear division; localized to the nucleus; essential component of the mechanism that activates the expression of a set of late-S-phase-specific genes	75.5	56.2	60.8	52.1
YDR185C	61.7	94.7	53.9	95.2
YNL074C MLF3 Serine-rich protein of unknown function; overproduction suppresses the growth inhibition caused by exposure to the immunosuppressant leflunomide	40.3	44.3	60.4	76.4
YDR336W	40.9	60.9	13.6	23.3
YDR351W SBE2 Protein involved in the transport of cell wall components from the Golgi to the cell surface; required for bud growth	36.5	71.4	4.4	9.9
YHR120W MSH1 DNA-binding protein of the mitochondria involved in repair of mitochondrial DNA, has ATPase activity and binds to DNA mismatches; has homology to E. coli MutS; transcription is induced during meiosis	8.9	13.6	3.3	5.8
YBR177C EHT1 Possible serine hydrolase, may be involved in lipid metabolism, null mutant slightly temperature sensitive at 37C	72.5	131.8	106.7	223.1
YDR046C BAP3 Amino acid permease involved in the uptake of cysteine, leucine, isoleucine and valine	6.9	4.5	4	3
YMR016C SOK2 Nuclear protein that plays a regulatory role in the cyclic AMP (cAMP)-dependent protein kinase (PKA) signal transduction pathway; negatively regulates pseudohyphal differentiation; homologous to several transcription factors	44	35	25.8	23.6
YBR111C YSA1 Nudix hydrolase family member with ADP-ribose pyrophosphatase activity	211.3	309.7	221.5	373.3
YBL058W SHP1 UBX (ubiquitin regulatory X) domain-containing protein that regulates Glc7p phosphatase activity and interacts with Cdc48p; interacts with ubiquitylated proteins in vivo and is required for degradation of a ubiquitylated model substrate	144.9	193.6	213.2	327.5
YDR101C ARX1 Protein associated with the ribosomal export complex	27.7	65.2	3.4	9.2
YOL122C SMF1 Divalent metal ion transporter with a broad specificity for di-valent and tri-valent metals; post-translationally regulated by levels of metal ions; member of the Nramp family of metal transport proteins	35.1	47	28	43.1
YDR385W EFT2 Elongation factor 2 (EF-2), also encoded by EFT1; catalyzes ribosomal translocation during protein synthesis; contains diphthamide, the unique posttranslationally modified histidine residue specifically ADP-ribosylated by diphtheria toxin	259.6	358.6	435.6	691.7
YIL173W VTH1 Putative membrane glycoprotein with strong similarity to Vth2p and Pep1p/Vps10p, may be involved in vacuolar protein sorting	7.4	10.3	4	6.4
YMR145C NDE1 Mitochondrial external NADH dehydrogenase, catalyzes the oxidation of cytosolic NADH; Nde1p and Nde2p are involved in providing the cytosolic NADH to the mitochondrial respiratory chain	583.2	536.4	616.7	652
YJL041W NSP1 Essential component of the nuclear pore complex, which mediates nuclear import and export	47.9	57.6	122.3	169
YER088C DOT6 Protein of unknown function, involved in telomeric gene silencing and filamentation	126.7	119.1	117.4	126.8
YOR020C HSP10 Mitochondrial matrix co-chaperonin that inhibits the ATPase activity of Hsp60p, a mitochondrial chaperonin; involved in protein folding and sorting in the mitochondria; 10 kD heat shock protein with similarity to E. coli groES	792.9	539.3	734.8	574.2
YDR003W RCR2 Probable integral membrane protein with similarity to Rcr1p; C-terminal region can functionally replace the corresponding region of Rcr1p in conferring Congo Red resistance when overexpressed; localizes to vacuole in a large-scale study	124.4	118	138.3	150.7
YBR234C ARC40 Essential subunit of the ARP2/3 complex, which is required for the motility and integrity of cortical actin patches	100.4	129.2	80.1	118.4
YMR166C	8.5	10	3.7	5
YOL147C PEX11 Peroxisomal membrane protein required for peroxisome proliferation and medium-chain fatty acid oxidation, most abundant protein in the peroxisomal membrane, regulated by Adr1p and Pip2p-Oaf1p, promoter contains ORE and UAS1-like elements	147.4	91.8	230.1	164.6
YGR292W MAL12 Maltase (alpha-D-glucosidase), inducible protein involved in maltose catabolism; encoded in the MAL1 complex locus	193.7	91.1	10	5.4
YLR259C HSP60 Tetradecameric mitochondrial chaperonin required for ATP-dependent folding of precursor polypeptides and complex assembly; prevents aggregation and mediates protein refolding after heat shock; role in mtDNA transmission; similarity to groEL	453.7	257	662.5	430.8
YGR267C FOL2 GTP-cyclohydrolase I, catalyzes the first step in the folic acid biosynthetic pathway	185.5	188.1	12.2	14.2
YFL057C AAD16 Putative aryl-alcohol dehydrogenase with similarity to P. chrysosporium aryl-alcohol dehydrogenase; mutational analysis has not yet revealed a physiological role	32.4	69.9	2.1	5.2
YHR193C EGD2 Alpha subunit of the heteromeric nascent polypeptide-associated complex (NAC) involved in protein sorting and translocation, associated with cytoplasmic ribosomes	171.5	259	176.5	305.9
YPL147W PXA1 Subunit of a heterodimeric peroxisomal ATP-binding cassette transporter complex (Pxa1p-Pxa2p), required for import of long-chain fatty acids into peroxisomes; similarity to human adrenoleukodystrophy transporter and ALD-related proteins	433.3	440.1	236.1	275.2
YNL048W ALG11 Alpha-1,2-mannosyltransferase, catalyzes addition of the terminal alpha 1,2-Man to the Man5GlcNAc2-PP-dolichol intermediate during asparagine-linked glycosylation in the ER	29.2	55.5	21	45.8
YNR001C CIT1 Citrate synthase, catalyzes the condensation of acetyl coenzyme A and oxaloacetate to form citrate; the rate-limiting enzyme of the TCA cycle; nuclear encoded mitochondrial protein	1803.8	2451	2088.2	3254.5
YDR222W	14.4	21.7	9.9	17.1
YKR067W GPT2 Glycerol-3-phosphate acyltransferase located in both lipid particles and the ER; involved in the stepwise acylation of glycerol-3-phosphate and dihydroxyacetone, which are intermediate steps in lipid biosynthesis	133.3	91.1	101.5	79.5
YMR205C PFK2 Beta subunit of heterooctameric phosphofructokinase involved in glycolysis, indispensable for anaerobic growth, activated by fructose-2,6-bisphosphate and AMP, mutation inhibits glucose induction of cell cycle-related genes	86.6	87.8	163.7	190.2
YPR036W VMA13 Subunit H of the eight-subunit V1 peripheral membrane domain of the vacuolar H+-ATPase (V-ATPase), an electrogenic proton pump found throughout the endomembrane system; serves as an activator or a structural stabilizer of the V-ATPase	134.4	232.4	92.5	183.3
YNL212W VID27 Cytoplasmic protein of unknown function; possibly involved in vacuolar protein degradation; not essential for proteasome-dependent degradation of fructose-1,6-bisphosphatase (FBPase); null mutants exhibit normal growth	75.1	77.1	64.1	75.4
YGL081W	583.1	758.8	566	843.9
YGL135W RPL1B N-terminally acetylated protein component of the large (60S) ribosomal subunit, nearly identical to Rpl1Bp and has similarity to E. coli L1 and rat L10a ribosomal proteins; rpl1a rpl1b double null mutation is lethal	350.8	699.6	103.3	236
YDL178W DLD2 D-lactate dehydrogenase, located in the mitochondrial matrix	49	61.5	41.8	60.1
YIL160C POT1 3-ketoacyl-CoA thiolase with broad chain length specificity, cleaves 3-ketoacyl-CoA into acyl-CoA and acetyl-CoA during beta-oxidation of fatty acids	169.4	142.9	273.3	264.1
YPL066W	37.4	41.1	14.3	18
YKL091C	51.1	46.5	28.6	29.8
YFL005W SEC4 Secretory vesicle-associated Rab GTPase essential for exocytosis; associates with the exocyst component Sec15p and may regulate polarized delivery of transport vesicles to the exocyst at the plasma membrane	456.1	405.4	484.5	493
YCR102C;YLR460C	27.2	29.7	2.8	3.5
YPL201C YIG1 Protein interacting with glycerol 3-phosphatase	356.4	237.8	257.4	196.6
YDR436W PPZ2 Serine/threonine protein phosphatase Z, isoform of Ppz1p; involved in regulation of potassium transport, which affects osmotic stability, cell cycle progression, and halotolerance	60.8	59.6	51.6	57.9
YPL153C RAD53 Protein kinase, required for cell-cycle arrest in response to DNA damage; activated by trans autophosphorylation when interacting with hyperphosphorylated Rad9p	7.3	12.3	1.4	2.7
YPL020C ULP1 Ubl (ubiquitin-like protein)-specific protease that cleaves Smt3p protein conjugates; specifically required for cell cycle progression; associates with nucleoporins and may interact with septin rings during telophase	90.7	96.1	30.6	37.1
YNL073W MSK1 Mitochondrial lysine-tRNA synthetase, required for import of both aminoacylated and deacylated forms of tRNA(Lys) into mitochondria	11.4	12.5	5.5	6.9
YLR390W ECM19 Non-essential protein of unknown function	25.3	25.3	22.9	26.2
YFL030W AGX1 Alanine : glyoxylate aminotransferase, catalyzes the synthesis of glycine from glyoxylate, which is one of three pathways for glycine biosynthesis in yeast; has similarity to mammalian and plant alanine : glyoxylate aminotransferases	151.3	257.9	148.6	289.7
YNL134C	86.2	110.6	106.2	155.8
YNR019W ARE2 Acyl-CoA:sterol acyltransferase, isozyme of Are1p; endoplasmic reticulum enzyme that contributes the major sterol esterification activity in the presence of oxygen	464.5	422.4	793.5	824.9
YOR174W MED4 Subunit of the RNA polymerase II mediator complex; associates with core polymerase subunits to form the RNA polymerase II holoenzyme; essential for transcriptional regulation	52.6	53.2	26.3	30.4
YKR065C PAM17 Presequence translocase-associated motor subunit, required for stable complex formation between cochaperones Pam16p and Pam18p, promotes association of Pam16p-Pam18p with the presequence translocase	67.4	60.8	58.4	60.2
YGL095C VPS45 Protein of the Sec1p/Munc-18 family, essential for vacuolar protein sorting; required for the function of Pep12p and the early endosome/late Golgi SNARE Tlg2p; essential for fusion of Golgi-derived vesicles with the prevacuolar compartment	60.1	57.5	35.4	38.7
YHR106W TRR2 Mitochondrial thioredoxin reductase involved in protection against oxidative stress, required with Glr1p to maintain the redox state of Trx3p, contains active-site motif (CAVC) present in prokaryotic thioredoxin reductases, binds NADPH and FAD	53.7	69.9	43.5	64.7
YLL041C SDH2 Iron-sulfur protein subunit of succinate dehydrogenase (Sdh1p, Sdh2p, Sdh3p, Sdh4p), which couples the oxidation of succinate to the transfer of electrons to ubiquinone	721.8	773	937.6	1147
YIL108W	42.9	43.5	61.3	71
YMR101C SRT1 Cis-prenyltransferase involved in synthesis of long-chain dolichols (19-22 isoprene units; as opposed to Rer2p which synthesizes shorter-chain dolichols); localizes to lipid bodies; transcription is induced during stationary phase	953.5	1504.9	1127.4	2031.9
YKL038W RGT1 Glucose-responsive transcription factor that regulates expression of several glucose transporter (HXT) genes in response to glucose; binds to promoters and acts both as a transcriptional activator and repressor	31.7	32	24.9	28.7
YNL056W	47	66.4	20.4	32.9
YML102W CAC2 Component of the chromatin assembly complex (with Rlf2p and Msi1p) that assembles newly synthesized histones onto recently replicated DNA, required for building functional kinetochores, conserved from yeast to humans	30.6	61.3	22	50.3
YMR104C YPK2 Protein kinase with similarityto serine/threonine protein kinase Ypk1p; functionally redundant with YPK1 at the genetic level; participates in a signaling pathway required for optimal cell wall integrity; homolog of mammalian kinase SGK	174.4	124.8	52.9	43.2
YGR013W SNU71 Component of U1 snRNP required for mRNA splicing via spliceosome; yeast specific, no metazoan counterpart	127.5	110.3	106.9	105.5
YLR056W ERG3 C-5 sterol desaturase, catalyzes the introduction of a C-5(6) double bond into episterol, a precursor in ergosterol biosynthesis; mutants are viable, but cannot grow on non-fermentable carbon sources	130.9	137.8	55.8	67
YBL071W-A KTI11 Protein required, along with Dph1p, Dph2p, Jjj3p, and Dph5p, for synthesis of diphthamide, which is a modified histidine residue of translation elongation factor 2 (Eft1p or Eft2p); may act in a complex with Dph1p and Dph2p	74.4	144	35.2	77.7
YDL080C THI3 Probable decarboxylase, required for expression of enzymes involved in thiamine biosynthesis; may have a role in catabolism of amino acids to long-chain and complex alcohols	61.4	78.2	17.9	26
YDR350C TCM10 Mitochondrial inner membrane protein required for assembly of the F0 sector of mitochondrial F1F0 ATP synthase, which is a large, evolutionarily conserved enzyme complex required for ATP synthesis	36.7	61.8	5	9.6
YDR173C ARG82 Protein involved in regulation of arginine-responsive and Mcm1p-dependent genes; has a dual-specificity inositol polyphosphate kinase activity required for regulation of phosphate- and nitrogen-responsive genes	106.7	113.9	84.3	102.6
YDR412W	18.4	43.9	8.9	24.2
YML127W RSC9 One of 15 subunits of the 'Remodel the Structure of Chromatin' (RSC) complex; DNA-binding protein involved in the synthesis of rRNA and in transcriptional repression and activation of genes regulated by the Target of Rapamycin (TOR) pathway	32.7	50	28.7	50
YJR058C APS2 Small subunit of the clathrin-associated adaptor complex AP-2, which is involved in protein sorting at the plasma membrane; related to the sigma subunit of the mammalian plasma membrane clathrin-associated protein (AP-2) complex	123.8	116.7	62.3	66.9
YGR178C PBP1 Protein interacting with poly(A)-binding protein Pab1p; likely involved in control of the extent of mRNA polyadenylation; also interacts with Mkt1p to form a complex that may regulate translation of the HO mRNA	81.1	92.8	69.9	91.1
YNL125C ESBP6 Protein with similarity to monocarboxylate permeases, appears not to be involved in transport of monocarboxylates such as lactate, pyruvate or acetate across the plasma membrane	39.5	64	12.9	23.8
YLR263W RED1 Protein component of the axial elements of the synaptonemal complex, involved in chromosome segregation during the first meiotic division; interacts with Hop1p; required for wild-type levels of Mek1p kinase activity	203.5	289.7	284.1	460.5
YLR057W	25	39.2	9.3	16.6
YBR169C SSE2 Member of the heat shock protein 70 (HSP70) family; may be involved in protein folding; localized to the cytoplasm; highly homologous to the heat shock protein Sse1p	251.6	279	379.2	478.5
YNL329C PEX6 Peroxisomal membrane AAA-family ATPase peroxin required for peroxisome assembly, contains two 230 amino acid ATP-binding AAA cassettes, interacts with Pex1p	24.7	29.5	7.8	10.6
YDR494W RSM28 Mitochondrial ribosomal protein of the small subunit; genetic interactions suggest a possible role in promoting translation initiation	86.5	95	51.3	64.1
YPL088W	120.1	182.3	79.1	136.5
YGL169W SUA5 Protein required for respiratory growth; null mutation suppresses the Cyc1p translation defect caused by the presence of an aberrant ATG codon upstream of the correct start	23.5	42.5	10.8	22.2
YDL154W MSH5 Protein of the MutS family, forms a dimer with Msh4p that facilitates crossovers between homologs during meiosis; msh5-Y823H mutation confers tolerance to DNA alkylating agents; homologs present in C. elegans and humans	227.2	298.1	119.9	178.8
YMR191W SPG5 Protein required for survival at high temperature during stationary phase; not required for growth on nonfermentable carbon sources	368	473.5	245.1	358.4
YBR139W	172.9	217.4	293.6	419.5
YMR298W LIP1 Ceramide synthase subunit; single-span ER membrane protein associated with Lag1p and Lac1p and required for ceramide synthase activity, null mutant grows extremely slowly and is defective in ceramide synthesis	146.2	169.8	138.8	183.1
YDR182W CDC1 Putative membrane protein of unknown function involved in Mn2+ homeostasis; mutants display actin and general growth defects, heterogeneous cell cycle arrests, and pleiotropic defects in cell cycle progression and organelle distribution	46.2	57.7	56.4	80
YBR111W-A SUS1 Protein involved in mRNA export coupled transcription activation; component of the SAGA histone acetylase complex	52.9	76.7	33.1	54.5
YIL114C POR2 Putative mitochondrial porin (voltage-dependent anion channel), related to Por1p but not required for mitochondrial membrane permeability or mitochondrial osmotic stability	37.2	48.6	30.4	45.1
YNL294C RIM21 Protein proposed to be involved in the response to alkaline pH; has similarity to A. nidulans PalH	51.3	70.7	10.1	15.8
YPL271W ATP15 Epsilon subunit of the F1 sector of mitochondrial F1F0 ATP synthase, which is a large, evolutionarily conserved enzyme complex required for ATP synthesis	1266.2	1503	1495.2	2014.4
YLR330W CHS5 Protein of unknown function, involved in chitin biosynthesis by regulating Chs3p localization, also involved in cell fusion during mating	123.3	102.9	107.8	102.1
YDL210W UGA4 Permease that serves as a gamma-aminobutyrate (GABA) transport protein involved in the utilization of GABA as a nitrogen source; catalyzes the transport of putrescine and delta-aminolevulinic acid (ALA); localized to the vacuolar membrane	23.8	31.8	15.5	23.5
YDR450W RPS18A Protein component of the small (40S) ribosomal subunit; nearly identical to Rps18Bp and has similarity to E. coli S13 and rat S18 ribosomal proteins	155.8	427.4	56.2	174.9
YKR057W RPS21A Protein component of the small (40S) ribosomal subunit; nearly identical to Rps21Bp and has similarity to rat S21 ribosomal protein	300.9	665.2	89	223.2
YML024W RPS17A Ribosomal protein 51 (rp51) of the small (40s) subunit; nearly identical to Rps17Bp and has similarity to rat S17 ribosomal protein	297.5	796.1	107.1	325.1
YDL060W TSR1 Protein required for processing of 20S pre-rRNA in the cytoplasm, associates with pre-40S ribosomal particles	11.2	26.7	2.7	7.3
YLR373C VID22 Glycosylated integral membrane protein localized to the plasma membrane; plays a role in fructose-1,6-bisphosphatase (FBPase) degradation; involved in FBPase transport from the cytosol to Vid (vacuole import and degradation) vesicles	61.9	47.2	45.8	39.6
YOL056W GPM3 Homolog of Gpm1p phosphoglycerate mutase which converts 3-phosphoglycerate to 2-phosphoglycerate in glycolysis; may be non-functional derivative of a gene duplication event	38.9	29.7	36.4	31.5
YAL008W FUN14 Mitochondrial protein of unknown function	136.4	143.4	155.2	184.9
YML108W	76.6	124.4	48.2	88.7
YNL117W MLS1 Malate synthase, enzyme of the glyoxylate cycle, involved in utilization of non-fermentable carbon sources; expression is subject to carbon catabolite repression; localizes in peroxisomes during growth in oleic acid medium	636.4	1063	1370.4	2593.7
YGR110W	154.4	161.8	145.8	173.1
YOR049C RSB1 Suppressor of sphingoid long chain base (LCB) sensitivity of an LCB-lyase mutation; putative integral membrane transporter or flippase that may transport LCBs from the cytoplasmic side toward the extracytoplasmic side of the membrane	46.4	82.4	16.8	33.8
YLR132C	3.6	9.3	6.7	19.6
YHR115C DMA1 Protein involved in regulating spindle position and orientation, functionally redundant with Dma2p; homolog of S. pombe Dma1 and H. sapiens Chfr	146.1	109.9	160.4	136.6
YDL238C GUD1 Guanine deaminase, a catabolic enzyme of the guanine salvage pathway producing xanthine and ammonia from guanine; activity is low in exponentially-growing cultures but expression is increased in post-diauxic and stationary-phase cultures	40	59.5	27.5	46.3
YDR438W	365.3	206.9	66.3	42.5
YBL091C MAP2 Methionine aminopeptidase, catalyzes the cotranslational removal of N-terminal methionine from nascent polypeptides; function is partially redundant with that of Map1p	85.2	126.7	72.5	122
YLR460C	24.1	28.4	0.9	1.2
YIR029W DAL2 Allantoicase, converts allantoate to urea and ureidoglycolate in the second step of allantoin degradation; expression sensitive to nitrogen catabolite repression and induced by allophanate, an intermediate in allantoin degradation	62.7	74.7	34.5	46.5
YBL034C STU1 Component of the mitotic spindle that binds to interpolar microtubules via its association with beta-tubulin (Tub2p); required for interpolar microtubules to provide an outward force on the spindle poles	47.4	46.8	63.3	70.7
YDR028C REG1 Regulatory subunit of type 1 protein phosphatase Glc7p, involved in negative regulation of glucose-repressible genes	118.5	100.5	61.4	58.9
YNL070W TOM7 Component of the TOM (translocase of outer membrane) complex responsible for recognition and initial import steps for all mitochondrially directed proteins; promotes assembly and stability of the TOM complex	203.2	119.5	169.6	112.8
YDL002C NHP10 Protein related to mammalian high mobility group proteins; likely component of the INO80 complex, which is an ATP-dependent chromatin-remodeling complex	76.5	103.3	28.5	43.5
YJL045W	81.1	188.5	69.2	181.8
YBL022C PIM1 Mitochondrial ATP-dependent protease involved in intramitochondrial proteolysis; involved in degradation of misfolded proteins in mitochondria; required for bigenesis and maintenance of mitochondria	100.2	80	133.1	120.1
YDR233C RTN1 Protein of unknown function; has similarity to mammalian reticulon proteins; member of the RTNLA (reticulon-like A) subfamily	259.7	274.3	321.9	384.2
YDR082W STN1 Telomere end-binding and capping protein, plays a key role with Pol12p in linking telomerase action with completion of lagging strand synthesis, and in a regulatory step required for telomere capping	42.4	39.4	2	2.1
YNL271C BNI1 Formin, nucleates the formation of linear actin filaments, involved in cell processes such as budding and mitotic spindle orientation which require the formation of polarized actin cables, functionally redundant with BNR1	60.7	57.6	44.3	47.5
YLR262C-A TMA7 Similar to C. elegans protein	309	404.2	189.1	279.5
YBR204C	139.8	170.5	99.2	136.7
YKR096W	38	28.6	22.7	19.3
YDL213C NOP6 Protein with similarity to hydrophilins, which are involved in the adaptive response to hyperosmotic conditions; computational analysis of large-scale protein-protein interaction data suggests a possible role in rRNA processing	49.1	84.3	21.4	41.5
YER019C-A SBH2 Ssh1p-Sss1p-Sbh2p complex component, involved in protein translocation into the endoplasmic reticulum; homologous to Sbh1p	424.8	441.2	249	292.1
YAL043C PTA1 Subunit of holo-CPF, a multiprotein complex and functional homolog of mammalian CPSF, required for the cleavage and polyadenylation of mRNA and snoRNA 3' ends; involved in pre-tRNA processing; binds to the phosphorylated CTD of RNAPII	49.7	34.2	70.9	55.1
YCR084C TUP1 General repressor of transcription, forms complex with Cyc8p, involved in the establishment of repressive chromatin structure through interactions with histones H3 and H4, appears to enhance expression of some genes	40.3	40	61.3	68.7
YPL222W FMP40 The authentic, non-tagged protein was localized to the mitochondria.	145.3	111.6	87.2	75.6
YDL142C CRD1 Cardiolipin synthase; produces cardiolipin, which is an important constituent of mitochondrial membranes; required for normal mitochondrial membrane potential and function	31.1	46.7	13.1	22.2
YDR270W CCC2 Cu(+2)-transporting P-type ATPase, required for export of copper from the cytosol into an extracytosolic compartment; has similarity to human proteins involved in Menkes and Wilsons diseases	170.4	68.4	186.1	84.3
YBR170C NPL4 Endoplasmic reticulum and nuclear membrane protein, forms a complex with Cdc48p and Ufd1p that recognizes ubiquitinated proteins in the endoplasmic reticulum and delivers them to the proteasome for degradation	78.1	130.8	119	224.9
YMR183C SSO2 Plasma membrane t-SNARE involved in fusion of secretory vesicles at the plasma membrane; syntaxin homolog that is functionally redundant with Sso1p	15.7	32.2	21	48.6
YLR022C SDO1 Essential protein involved in RNA metabolism, one of two yeast homologs (with Yhr087wp) of the human protein SBDS responsible for autosomal recessive Shwachman-Bodian-Diamond Syndrome, also conserved in Archaea	69.9	96.1	47.9	74.3
YDR501W PLM2 Protein required for partitioning of the 2-micron plasmid	16.3	18.6	19.5	25.1
YJR064W CCT5 Subunit of the cytosolic chaperonin Cct ring complex, related to Tcp1p, required for the assembly of actin and tubulins in vivo	138	245.8	157.3	316
YHR027C RPN1 Non-ATPase base subunit of the 19S regulatory particle of the 26S proteasome; may participate in the recognition of several ligands of the proteasome; contains a leucine-rich repeat (LRR) domain, a site for protein?protein interactions	284	416.1	357.8	591.1
YMR163C	15.5	23.5	8.6	14.7
YER166W DNF1 Non-essential P-type ATPase that is a potential aminophospholipid translocase, localizes to the plasma membrane and late exocytic or early endocytic membranes, likely involved in protein transport	120.7	76	47.2	33.5
YGR074W SMD1 Core Sm protein Sm D1; part of heteroheptameric complex (with Smb1p, Smd2p, Smd3p, Sme1p, Smx3p, and Smx2p) that is part of the spliceosomal U1, U2, U4, and U5 snRNPs; homolog of human Sm D1	24.5	34.1	42.9	67.3
YDR427W RPN9 Non-ATPase regulatory subunit of the 26S proteasome, has similarity to putative proteasomal subunits in other species; null mutant is temperature sensitive and exhibits cell cycle and proteasome assembly defects	379.7	570	439.1	742.8
YML121W GTR1 Cytoplasmic GTP binding protein and negative regulator of the Ran/Tc4 GTPase cycle, through its homolog and binding partner, Gtr2p; involved in phosphate transport and invasive growth; human RagA and RagB proteins are functional homologs	56.8	113.7	16.1	36.3
YDL130W-A STF1 Protein involved in regulation of the mitochondrial F1F0-ATP synthase; Stf1p and Stf2p act as stabilizing factors that enhance inhibitory action of the Inh1p protein	630.3	551	548.6	540.1
YGR035C	56.5	60.8	69.9	84.7
YIL137C TMA108 Putative metalloprotease	23.1	29.6	21	30.3
YJR135C MCM22 Protein involved in minichromosome maintenance; component of the kinetochore; binds to centromeric DNA in a Ctf19p-dependent manner	24.4	38.2	11.8	20.8
YOL101C IZH4 Membrane protein involved in zinc metabolism, member of the four-protein IZH family, expression induced by fatty acids and altered zinc levels; deletion reduces sensitivity to excess zinc; possible role in sterol metabolism	50.7	66.6	28.4	42
YOR163W DDP1 Diadenosine polyphosphate hydrolase, member of the MutT family of nucleotide hydrolases with high specificity for diadenosine hexa- and pentaphosphates, required for efficient hydrolysis of diphosphorylated inositol polyphosphates	118.3	117.8	133.9	150
YNL059C ARP5 Nuclear actin-related protein involved in chromatin remodeling, component of chromatin-remodeling enzyme complexes	32.5	49.8	14.1	24.3
YPL156C PRM4 Pheromone-regulated protein, predicted to have 1 transmembrane segment; transcriptionally regulated by Ste12p during mating and by Cat8p during the diauxic shift	493.7	384.9	487.9	427.7
YJL055W	165.7	159.7	120.8	130.9
YFR025C HIS2 Histidinolphosphatase, catalyzes the eighth step in histidine biosynthesis; mutations cause histidine auxotrophy and sensitivity to Cu, Co, and Ni salts; transcription is regulated by general amino acid control	27.6	46.1	17.1	32.1
YLR189C ATG26 UDP-glucose:sterol glucosyltransferase, conserved enzyme involved in synthesis of sterol glucoside membrane lipids, involved in autophagy	50.3	60.3	22.2	29.9
YNL031C HHT2 One of two identical histone H3 proteins (see also HHT1); core histone required for chromatin assembly, involved in heterochromatin-mediated telomeric and HM silencing; regulated by acetylation, methylation, and mitotic phosphorylation	2828.1	2532.4	3510.9	3531.2
YNL131W TOM22 Component of the TOM (translocase of outer membrane) complex responsible for initial import of mitochondrially directed proteins; acts as a receptor for precursor proteins and mediates interaction between the TOM and TIM complexes	152.1	125.2	310.9	287.4
YPL072W UBP16 Putative ubiquitin-specific protease	38.3	40.5	4.8	5.7
YJL031C BET4 Alpha subunit of Type II geranylgeranyltransferase required for vesicular transport between the endoplasmic reticulum and the Golgi; provides a membrane attachment moiety to Rab-like proteins Ypt1p and Sec4p	148.6	182.1	79.3	109.1
YJL115W ASF1 Nucleosome assembly factor, involved in chromatin assembly after DNA replication, anti-silencing protein that causes derepression of silent loci when overexpressed	42.8	59.8	40.1	62.9
YMR186W;YPL240C	5379.5	5838.6	6340.9	7726
YOR156C NFI1 SUMO ligase, catalyzes the covalent attachment of SUMO (Smt3p) to proteins	19.4	12.1	19	13.3
YKL161C	50	75.2	3.2	5.4
YMR098C	34.9	42.2	24.7	33.5
YHR021C RPS27B Protein component of the small (40S) ribosomal subunit; nearly identical to Rps27Ap and has similarity to rat S27 ribosomal protein	356.5	865	183.8	500.1
YPR134W MSS18 Nuclear encoded protein needed for efficient splicing of mitochondrial COX1 aI5beta intron; mss18 mutations block cleavage of 5' exon - intron junction; phenotype of intronless strain suggests additional functions	69.1	83.2	47.7	64.4
YBR195C MSI1 Subunit of chromatin assembly factor I (CAF-I), regulates the RAS/cAMP pathway via sequestration of Npr1p kinase; localizes to the nucleus and cytoplasm; homologous to human retinoblastoma binding proteins RbAp48 and RbAp46	105.1	102.3	104	113.5
YKR051W	52.2	75.4	16.8	27.2
YER078C	24.3	24	20.6	22.8
YLR231C BNA5 Kynureninase, required for biosynthesis of nicotinic acid from tryptophan via kynurenine pathway	40.9	70.5	36.3	70.1
YEL063C CAN1 Plasma membrane arginine permease, requires phosphatidyl ethanolamine (PE) for localization, exclusively associated with lipid rafts; mutation confers canavanine resistance	142.6	111.7	154.2	135.3
YOR079C ATX2 Golgi membrane protein involved in manganese homeostasis; overproduction suppresses the sod1 (copper, zinc superoxide dismutase) null mutation	23.4	33	19.5	30.8
YCL055W KAR4 Transcription factor required for induction of KAR3 and CIK1 during mating, also required during meiosis; exists in two forms, a slower-migrating form more abundant during vegetative growth and a faster-migrating form induced by pheromone	210	199.6	245.3	261.1
YDR313C PIB1 RING-type ubiquitin ligase of the endosomal and vacuolar membranes, binds phosphatidylinositol(3)-phosphate; contains a FYVE finger domain	191.1	237.8	177.2	246.9
YDR090C	56.8	81.6	90.6	145.7
YGR118W RPS23A Ribosomal protein 28 (rp28) of the small (40S) ribosomal subunit, required for translational accuracy; nearly identical to Rps23Bp and similar to E. coli S12 and rat S23 ribosomal proteins; deletion of both RPS23A and RPS23B is lethal	399.7	859.3	162.9	392
YFR031C-A;YIL018W	319.9	808.3	76.2	215.5
YPR055W SEC8 Essential 121kDa subunit of the exocyst complex (Sec3p, Sec5p, Sec6p, Sec8p, Sec10p, Sec15p, Exo70p, and Exo84p), which has the essential function of mediating polarized targeting of secretory vesicles to active sites of exocytosis	23.7	32.9	12.1	18.8
YNL291C MID1 N-glycosylated integral membrane protein of the ER membrane and plasma membrane, required for Ca2+ influx stimulated by pheromone, functions as a stretch-activated Ca2+-permeable cation channel in mammals; forms an oligomer	11.2	12.3	5.7	7
YDR400W URH1 Uridine nucleosidase (uridine-cytidine N-ribohydrolase), cleaves N-glycosidic bonds in nucleosides; involved in recycling pyrimidine deoxy- and ribonucleosides via the pyrimidine salvage pathway	53.1	74.6	55.9	87.8
YBL086C	56.1	58.1	46.3	53.6
YIL031W ULP2 Peptidase that deconjugates Smt3/SUMO-1 peptides from proteins, plays a role in chromosome cohesion at centromeric regions and recovery from checkpoint arrest induced by DNA damage or DNA replication defects; potential Cdc28p substrate	261.6	350.4	16.9	25.3
YER124C DSE1 Daughter cell-specific protein, may participate in pathways regulating cell wall metabolism; deletion affects cell separation after division and sensitivity to drugs targeted against the cell wall	16.2	26.1	1	1.8
YFL062W COS4 Protein of unknown function, member of a family of conserved, often subtelomerically-encoded proteins	84.1	65.9	57.8	50.6
YNL255C GIS2 Putative zinc finger protein with similarity to human CNBP, proposed to be involved in the RAS/cAMP signaling pathway	299.3	364.5	246.4	335.2
YHR156C LIN1 Non-essential component of U5 snRNP; nuclear protein; physically interacts with Irr1p of cohesin complex; may link together proteins involved in chromosome segregation, mRNA splicing and DNA replication	68.5	101.9	13.3	22.1
YLR320W MMS22 Protein involved in resistance to ionizing radiation; acts with Mms1p in a repair pathway that may be involved in resolving replication intermediates or preventing the damage caused by blocked replication forks	14	17.7	3.4	4.8
YBR253W SRB6 Subunit of the RNA polymerase II mediator complex; associates with core polymerase subunits to form the RNA polymerase II holoenzyme; essential for transcriptional regulation	182.3	185.7	67.7	77
YEL024W RIP1 Ubiquinol-cytochrome-c reductase, a Rieske iron-sulfur protein of the mitochondrial cytochrome bc1 complex; transfers electrons from ubiquinol to cytochrome c1 during respiration	522.1	529.8	867.5	982.7
YDR124W	5.1	4.3	1.7	1.6
YNL085W MKT1 Protein that forms a complex with Pbp1p that may mediate posttranscriptional regulation of HO endonuclease; involved in propagation of M2 dsRNA satellite of L-A virus	47.2	61.3	31.8	46.1
YPL199C	19.9	20.8	17.4	20.3
YCR020C-A MAK31 Non-catalytic subunit of N-terminal acetyltransferase of the NatC type; required for replication of dsRNA virus; member of the Sm protein family	35.5	75.4	45.6	108.1
YDR334W SWR1 Swi2/Snf2-related ATPase, component of the SWR1 complex; required for the incorporation of Htz1p into chromatin	39.3	30.4	5.1	4.4
YAL019W FUN30 Protein whose overexpression affects chromosome stability, potential Cdc28p substrate; homolog of Snf2p	14.8	26.2	7.5	14.8
YDR040C ENA1 P-type ATPase sodium pump, involved in Na+ and Li+ efflux to allow salt tolerance	635.2	234.8	1333.6	549.5
YLR404W	40.3	74.4	31.3	64.4
YMR284W YKU70 Subunit of the telomeric Ku complex (Yku70p-Yku80p), involved in telomere length maintenance, structure and telomere position effect; relocates to sites of double-strand cleavage to promote nonhomologous end joining during DSB repair	20.4	38	6.6	13.7
YPR019W CDC54 Essential helicase component of heterohexameric MCM2-7 complexes which bind pre-replication complexes on DNA and melt the DNA prior to replication; accumulates in the nucleus in G1; homolog of S. pombe Cdc21p	38	56.9	38.6	64.4
YOR311C HSD1 Endoplasmic reticulum (ER)-resident membrane protein, overproduction induces enlargement of ER-like membrane structures and suppresses a temperature-sensitive sly1 mutation	37.1	81.7	19.4	47.6
YMR276W DSK2 Nuclear-enriched ubiquitin-like polyubiquitin-binding protein, required for spindle pole body (SPB) duplication and for transit through the G2/M phase of the cell cycle, involved in proteolysis, interacts with the proteasome	157	198.9	505.1	712.9
YBR034C HMT1 Nuclear SAM-dependent mono- and asymmetric arginine dimethylating methyltransferase that modifies hnRNPs, including Npl3p and Hrp1p, thus facilitating nuclear export of these proteins; required for viability of npl3 mutants	65.7	134.8	25.9	59.2
YDR213W UPC2 Sterol regulatory element binding protein, induces transcription of sterol transport and biosynthetic genes; involved in the anaerobic induction of DAN/TIR mannoproteins and seripauperins; binucleate zinc cluster protein; Ecm22p homolog	51.8	42.8	36.4	33.5
YCL068C;YCR038C	28.8	19.9	44.7	34.4
YML007C-A	12.3	11.5	51	53.1
YOR187W TUF1 Mitochondrial translation elongation factor Tu; comprises both GTPase and guanine nucleotide exchange factor activities, while these activities are found in separate proteins in S. pombe and humans	231.1	113.1	261.4	142.4
YML049C RSE1 Protein involved in pre-mRNA splicing; component of the pre-spliceosome; associates with U2 snRNA; involved in ER to Golgi transport	25.4	45	21.2	41.8
YDR541C	16.5	32	1.9	4.1
YIR036C	71	103.2	82.3	133.1
YMR021C MAC1 Copper-sensing transcription factor involved in regulation of genes required for high affinity copper transport	43	48.5	35.7	44.8
YEL053C MAK10 Non-catalytic subunit of N-terminal acetyltransferase of the NatC type, required for replication of dsRNA virus; expression is glucose-repressible	8	22.6	2.1	6.6
YBR118W;YPR080W	4785.3	7822.9	5266.9	9577.3
YBR094W	74	67.3	71.6	72.4
YBR262C FMP51 The authentic, non-tagged protein was localized to the mitochondria	136.4	130.4	43.2	45.9
YLR362W STE11 Signal transducing MEK kinase involved in pheromone response and pseudohyphal/invasive growth pathways, where it phosphorylates Ste7p, and the high osmolarity response pathway, via phosphorylation of Pbs2p; regulated by Ste20p and Ste50p	31.3	42.4	27.3	41.1
YPL236C	44.7	53.5	31.2	41.5
YJR080C FMP26 The authentic, non-tagged protein was localized to the mitochondria	36.8	35	22.9	24.2
YOR005C DNL4 DNA ligase required for nonhomologous end-joining (NHEJ), forms stable heterodimer with required cofactor Lif1p, catalyzes DNA ligation as part of a complex with Lif1p and Nej1p; involved in meiosis, not essential for vegetative growth	29	40.6	9.9	15.4
YKL027W	25.7	59.1	5.6	14.3
YER158C	23.7	34.1	8.2	13.1
YAR002C-A ERP1 Protein that forms a heterotrimeric complex with Erp2p, Emp24p, and Erv25p; member, along with Emp24p and Erv25p, of the p24 family involved in ER to Golgi transport and localized to COPII-coated vesicles	177.9	242.8	160.5	243.2
YNL155W	1045.7	908.7	107.5	103.7
YGR017W	78.9	116.8	41.2	67.7
YPL178W CBC2 Small subunit of the heterodimeric cap binding complex that also contains Sto1p, component of the spliceosomal commitment complex; interacts with Npl3p, possibly to package mRNA for export from the nucleus; contains an RNA-binding motif	941.4	763.6	733.9	660.7
YMR190C SGS1 Nucleolar DNA helicase of the RecQ family involved in maintenance of genome integrity, regulates chromosome synapsis and meiotic crossing over; has similarity to human BLM and WRN helicases implicated in Bloom and Werner syndromes	56.8	56.1	40.7	44.6
YNR035C ARC35 Subunit of the ARP2/3 complex, which is required for the motility and integrity of cortical actin patches; required for cortical localization of calmodulin	129.7	146.1	108.5	135.6
YDR097C MSH6 Protein required for mismatch repair in mitosis and meiosis, forms a complex with Msh2p to repair both single-base & insertion-deletion mispairs; potentially phosphorylated by Cdc28p	21.4	23.7	25.4	31.2
YIL151C	25.1	29.8	6	7.9
YML014W TRM9 tRNA methyltransferase, catalyzes the esterification of modified uridine nucleotides in tRNAs, creating 5-methylcarbonylmethyluridine in tRNA(Arg3) and 5-methylcarbonylmethyl-2-thiouridine in tRNA(Glu); may have a role in stress response	18.7	39.2	13	30.2
YAR008W SEN34 Subunit of the tRNA splicing endonuclease, which is composed of Sen2p, Sen15p, Sen34p, and Sen54p; Sen34p contains the active site for tRNA 3' splice site cleavage and has similarity to Sen2p and to Archaeal tRNA splicing endonuclease	32	56.4	14.9	29.1
[truncated: 4,550 more rows]
