# Supplementary material for: Bidirectional promoter activity from expression cassettes can drive off-target repression of neighboring gene translation
Source: eLife. 2022 Dec 12;11:e81086. doi: 10.7554/eLife.81086 (PMC9754628; doi:10.7554/eLife.81086)
Supplement: Figure 2—source data 1. [file elife-81086-fig2-data1.xlsx]

## Sheet: description
Label free quantification of all proteins identified in fractionated polysome samples from figure 2, data from two independently collected biological replicates are shown
samples were collected at 4h after transfer into SPO media

## Sheet: LFQ Intensity values
Protein_IDs	Gene_Names	Majority_protein_IDs	dbp1∆::KANMX6_fraction1_R1	dbp1∆::KANMX6_fraction2_R1	dbp1∆::KANMX6_fraction3_R1	dbp1∆::KANMX6_fraction4_R1	dbp1∆::KANMX6_fraction5_R1	dbp1∆::KANMX6_fraction6_R1	dbp1∆::KANMX6_fraction1_R2	dbp1∆::KANMX6_fraction2_R2	dbp1∆::KANMX6_fraction3_R2	dbp1∆::KANMX6_fraction4_R2	dbp1∆::KANMX6_fraction5_R2	dbp1∆::KANMX6_fraction6_R2	Wildtype_fraction1_R1	Wildtype_fraction2_R1	Wildtype_fraction3_R1	Wildtype_fraction4_R1	Wildtype_fraction5_R1	Wildtype_fraction6_R1	Wildtype_fraction1_R2	Wildtype_fraction2_R2	Wildtype_fraction3_R2	Wildtype_fraction4_R2	Wildtype_fraction5_R2	Wildtype_fraction6_R2
sp|A5Z2X5|YP010_YEAST	YP010	sp|A5Z2X5|YP010_YEAST	0	0	0	0	0	0	0	0	0	0	0	0	0	0	0	0	0	0	0	0	0	0	0	21420000
sp|D6W196|CMC1_YEAST	CMC1	sp|D6W196|CMC1_YEAST	0	0	0	0	0	0	6217800	0	0	0	0	0	0	0	0	0	0	0	0	0	0	0	0	0
sp|O13297|CET1_YEAST	CET1	sp|O13297|CET1_YEAST	0	0	0	0	0	0	0	0	0	0	0	0	0	0	0	0	0	0	4981000	0	0	0	0	0
sp|O13516|RS9A_YEAST	RS9A	sp|O13516|RS9A_YEAST	0	89677000	142460000	579280000	710700000	686120000	0	0	0	487160000	546360000	1216500000	0	0	0	171480000	0	0	0	0	128200000	170680000	223610000	290930000
sp|O13535|YH11B_YEAST;sp|Q03619|YE12B_YEAST;sp|Q12088|YL11B_YEAST;sp|Q04670|YM14B_YEAST;sp|Q12441|YD12A_YEAST;sp|P0CX69|YM14A_YEAST;sp|Q03856|YD11A_YEAST;sp|P0CX67|YG13A_YEAST;sp|Q12193|YB12B_YEAST;sp|P0CX66|YE12A_YEAST;sp|Q99231|YD12B_YEAST;sp|Q92393|YO12B_YEAST;sp|Q12316|YG13B_YEAST;sp|Q03855|YD11B_YEAST;sp|P0C2I2|YD14B_YEAST;sp|P0C2J0|YP13B_YEAST;sp|P0CX68|YL11A_YEAST;sp|P0C2I4|YH11A_YEAST;sp|…	YH11B	sp|O13535|YH11B_YEAST;sp|Q03619|YE12B_YEAST;sp|Q12088|YL11B_YEAST;sp|Q04670|YM14B_YEAST;sp|Q12441|YD12A_YEAST;sp|P0CX69|YM14A_YEAST;sp|Q03856|YD11A_YEAST;sp|P0CX67|YG13A_YEAST;sp|Q12193|YB12B_YEAST;sp|P0CX66|YE12A_YEAST;sp|Q99231|YD12B_YEAST;sp|Q92393|YO12B_YEAST;sp|Q12316|YG13B_YEAST;sp|Q03855|YD11B_YEAST;sp|P0C2I2|YD14B_YEAST;sp|P0C2J0|YP13B_YEAST;sp|P0CX68|YL11A_YEAST;sp|P0C2I4|YH11A_YEAST;sp|…	0	0	0	110980000	318610000	207230000	0	0	0	143130000	586790000	238950000	0	0	0	87180000	81363000	19027000	0	0	69297000	117880000	113780000	69217000
sp|O13547|CCW14_YEAST	CCW14	sp|O13547|CCW14_YEAST	0	0	0	20205000	28502000	23062000	0	0	0	0	19537000	0	0	0	0	0	18149000	17973000	0	0	0	0	0	0
sp|O13563|RPN13_YEAST	RPN13	sp|O13563|RPN13_YEAST	39554000	105170000	43379000	0	0	0	65655000	207750000	0	0	0	0	37687000	165320000	18169000	0	0	0	53825000	191850000	36639000	10293000	5604700	0
sp|O13585|YP089_YEAST	YP089	sp|O13585|YP089_YEAST	0	0	0	0	0	0	0	0	0	0	0	0	0	0	1115500	0	0	0	0	0	0	0	0	0
sp|O14455|RL36B_YEAST	RL36B	sp|O14455|RL36B_YEAST	3577000	10884000	1216000000	15636000000	13084000000	19870000000	3546700	54271000	939120000	17317000000	14952000000	17513000000	0	54276000	1827600000	8300300000	11117000000	17862000000	0	11740000	888040000	9639500000	10672000000	20918000000
sp|O14467|MBF1_YEAST	MBF1	sp|O14467|MBF1_YEAST	0	129950000	93934000	0	0	0	0	73188000	67985000	0	0	0	0	0	43729000	0	0	0	0	51333000	0	0	0	0
sp|P00044|CYC1_YEAST;sp|P00045|CYC7_YEAST	CYC1	sp|P00044|CYC1_YEAST	338320000	0	63068000	0	20859000	17227000	516970000	14538000	0	0	0	0	102490000	0	0	0	0	0	50469000	0	0	0	0	0
sp|P00127|QCR6_YEAST	QCR6	sp|P00127|QCR6_YEAST	0	415480000	956180000	0	60911000	0	0	126900000	139500000	0	0	87017000	0	0	0	0	0	0	0	112710000	0	0	0	0
sp|P00128|QCR7_YEAST	QCR7	sp|P00128|QCR7_YEAST	518220000	577750000	773940000	3112900000	7316700000	9176300000	147250000	182330000	158210000	1901200000	5012700000	8137400000	107780000	248070000	224210000	4940700000	14072000000	8660900000	188350000	319980000	378700000	4213800000	10317000000	6237100000
sp|P00163|CYB_YEAST;sp|P03873|MBI2_YEAST;sp|Q9ZZW7|MBI3_YEAST;sp|P03879|MBI4_YEAST	CYB	sp|P00163|CYB_YEAST;sp|P03873|MBI2_YEAST;sp|Q9ZZW7|MBI3_YEAST;sp|P03879|MBI4_YEAST	45342000	848480000	549460000	294330000	609580000	771260000	0	377920000	289680000	120870000	273730000	515780000	0	333650000	279710000	306240000	871990000	462520000	0	627310000	656390000	378360000	1069700000	420160000
sp|P00175|CYB2_YEAST	CYB2	sp|P00175|CYB2_YEAST	1045300000	48864000	21865000	107220000	63387000	61052000	894660000	130430000	0	133180000	74276000	29953000	757440000	140770000	37491000	142940000	98842000	102680000	834600000	55799000	22940000	169310000	129410000	120750000
sp|P00330|ADH1_YEAST	ADH1	sp|P00330|ADH1_YEAST	25192000000	4685900000	3681700000	3070500000	3081600000	2525200000	23081000000	5806500000	4769200000	3136100000	3818100000	3710000000	17052000000	5327500000	5042300000	3345400000	2369300000	2021200000	17405000000	4696700000	4187400000	3118700000	2842500000	2162400000
sp|P00331|ADH2_YEAST	ADH2	sp|P00331|ADH2_YEAST	5221900000	132070000	673040000	749920000	621870000	607830000	4244500000	283390000	448170000	850250000	722050000	776850000	6233100000	363230000	434500000	1241400000	754360000	650580000	6117200000	238490000	1232700000	1228400000	854150000	797430000
sp|P00358|G3P2_YEAST	G3P2	sp|P00358|G3P2_YEAST	5486500000	1463500000	220120000	2462500000	1306300000	1971700000	6701000000	2625000000	3490000000	2358400000	1558500000	318020000	3766400000	254200000	27170000	2321200000	1544700000	1527000000	7087700000	1444100000	1051400000	2654400000	1707700000	1482800000
sp|P00359|G3P3_YEAST	G3P3	sp|P00359|G3P3_YEAST	74157000000	28443000000	17122000000	11006000000	11415000000	9092400000	74904000000	24583000000	17948000000	11506000000	11336000000	11927000000	67185000000	14466000000	19537000000	11176000000	7318900000	6270600000	70353000000	20930000000	16419000000	12387000000	8951900000	7339700000
sp|P00360|G3P1_YEAST	G3P1	sp|P00360|G3P1_YEAST	2842700000	529120000	298570000	203290000	133580000	57454000	2148700000	437400000	242230000	185390000	62164000	132280000	4063200000	659410000	467940000	392240000	105170000	98172000	2702100000	426770000	188280000	169460000	62121000	71949000
sp|P00401|COX1_YEAST;sp|Q9ZZX1|SCE4_YEAST;sp|P03875|AI1M_YEAST;sp|P03876|AI2M_YEAST	COX1	sp|P00401|COX1_YEAST	0	0	0	424970000	638950000	921310000	0	0	0	229740000	368490000	127960000	6659500	0	0	568310000	1671500000	1981800000	0	0	12768000	715830000	1335500000	1336400000
sp|P00410|COX2_YEAST	COX2	sp|P00410|COX2_YEAST	243770000	1833500000	1219900000	2350800000	4265600000	6499700000	144830000	1210600000	700520000	1181100000	2259700000	4251200000	276190000	1503700000	1860900000	3876300000	10379000000	11812000000	326730000	2523800000	3345100000	5125200000	10849000000	9172700000
sp|P00420|COX3_YEAST	COX3	sp|P00420|COX3_YEAST	0	0	0	0	0	0	0	0	0	0	0	0	0	0	0	0	130070000	124670000	0	0	0	0	0	0
sp|P00424|COX5A_YEAST	COX5A	sp|P00424|COX5A_YEAST	132210000	246280000	263280000	542300000	1695800000	1716800000	92323000	126060000	108450000	257170000	764990000	1804400000	159050000	266920000	260510000	1395600000	4036800000	2529000000	141240000	287940000	122950000	1479000000	4182400000	2209700000
sp|P00427|COX6_YEAST	COX6	sp|P00427|COX6_YEAST	150070000	137340000	657620000	231450000	795400000	923930000	167970000	104380000	119660000	160740000	366600000	1116800000	152760000	158050000	133960000	652580000	2251900000	1255400000	126890000	131770000	115180000	562850000	1801800000	767860000
sp|P00431|CCPR_YEAST	CCPR	sp|P00431|CCPR_YEAST	397340000	9069700	7504700	0	0	0	455270000	11067000	0	0	0	0	298420000	10283000	0	0	0	0	201130000	0	0	0	0	0
sp|P00447|SODM_YEAST	SODM	sp|P00447|SODM_YEAST	293950000	49042000	0	24411000	0	0	319010000	81290000	0	59082000	0	65293000	189150000	262540000	90007000	51050000	0	0	151600000	161940000	0	16912000	0	0
sp|P00498|HIS1_YEAST	HIS1	sp|P00498|HIS1_YEAST	0	0	0	0	0	0	0	0	0	0	0	0	0	0	0	0	0	0	0	0	0	0	7687800	0
sp|P00546|CDK1_YEAST	CDK1	sp|P00546|CDK1_YEAST	114340000	112360000	59771000	86725000	68834000	50517000	101150000	98337000	60882000	56723000	76310000	0	131270000	183970000	177530000	97185000	99734000	99832000	104520000	152520000	104030000	92562000	87278000	89123000
sp|P00549|KPYK1_YEAST	KPYK1	sp|P00549|KPYK1_YEAST	11546000000	3838100000	3272900000	2921800000	2967600000	2029200000	9210000000	4410100000	3310500000	2989900000	3474100000	3079500000	12074000000	6923100000	6466500000	5395100000	3910700000	3346300000	13960000000	5771700000	5523900000	5399000000	4733600000	3848000000
sp|P00560|PGK_YEAST	PGK	sp|P00560|PGK_YEAST	19302000000	4865500000	4194700000	1965800000	1948000000	1204800000	16232000000	3430200000	3971500000	1896000000	2304200000	2561400000	16234000000	3667700000	3361000000	1685500000	1137800000	946140000	11599000000	3354400000	2947000000	1699200000	1358900000	1121500000
sp|P00724-2|INV2_YEAST;sp|P00724|INV2_YEAST	INV2	sp|P00724-2|INV2_YEAST;sp|P00724|INV2_YEAST	183600000	1066400000	481550000	0	0	0	211150000	3583900000	498730000	29663000	0	0	47801000	1976300000	86017000	26521000	14337000	0	31410000	654250000	57066000	26685000	0	22338000
sp|P00729|CBPY_YEAST	CBPY	sp|P00729|CBPY_YEAST	87924000	92176000	50867000	16794000	0	14434000	64247000	92654000	0	17053000	13341000	24454000	129790000	118710000	15293000	24482000	0	0	262510000	82854000	47937000	29124000	17222000	0
sp|P00812|ARGI_YEAST	ARGI	sp|P00812|ARGI_YEAST	1207400000	375740000	338100000	177520000	146700000	143890000	1181100000	264230000	254510000	181070000	200300000	198610000	1037700000	348960000	371980000	200700000	180650000	168500000	915340000	299770000	241560000	189750000	159300000	128340000
sp|P00815|HIS2_YEAST	HIS2	sp|P00815|HIS2_YEAST	374900000	16502000	11866000	7807000	5003300	5714700	425300000	17068000	0	20622000	5116100	6932600	377220000	17665000	13162000	17536000	4816600	4811000	517250000	9788600	7027000	23089000	33942000	4729000
sp|P00817|IPYR_YEAST	IPYR	sp|P00817|IPYR_YEAST	1155900000	534820000	469270000	126190000	74738000	158550000	2229800000	412490000	138740000	112810000	36093000	103720000	1150400000	638640000	588220000	165120000	108530000	96612000	469380000	518080000	311410000	177400000	112060000	79517000
sp|P00830|ATPB_YEAST	ATPB	sp|P00830|ATPB_YEAST	18497000000	16569000000	20159000000	13762000000	6564600000	3755700000	17581000000	19824000000	18922000000	11699000000	8537300000	5936900000	12970000000	45530000000	28732000000	26155000000	19373000000	10227000000	14244000000	40783000000	68640000000	32000000000	16107000000	8020300000
sp|P00854|ATP6_YEAST	ATP6	sp|P00854|ATP6_YEAST	0	0	0	0	0	0	0	3433100	0	0	0	0	57310000	0	0	0	0	0	66928000	0	0	0	0	0
sp|P00890|CISY1_YEAST	CISY1	sp|P00890|CISY1_YEAST	17373000000	2686800000	2124600000	1144400000	605490000	691340000	16835000000	2790100000	1891200000	1270400000	857500000	1444700000	11429000000	2308900000	1769000000	983390000	460610000	648880000	11612000000	2220400000	2120300000	1183200000	660450000	801740000
sp|P00899|TRPE_YEAST	TRPE	sp|P00899|TRPE_YEAST	57767000	0	0	0	0	0	63488000	0	0	0	0	0	55083000	17113000	0	0	0	0	68410000	0	0	0	0	0
sp|P00924|ENO1_YEAST	ENO1	sp|P00924|ENO1_YEAST	636270000	174020000	264650000	295020000	437660000	258210000	496710000	545630000	360890000	629960000	478050000	543550000	892480000	902150000	206330000	388420000	361600000	287900000	639460000	684490000	389530000	382900000	280750000	341720000
sp|P00925|ENO2_YEAST	ENO2	sp|P00925|ENO2_YEAST	2718700000	3485200000	2645500000	1209800000	908920000	818690000	2361400000	4445100000	3374200000	1311200000	1045900000	1512900000	3017500000	5169700000	4110500000	1399300000	935870000	919610000	3242600000	4579100000	4551400000	1677500000	947530000	799460000
sp|P00927|THDH_YEAST	THDH	sp|P00927|THDH_YEAST	267380000	0	20384000	14564000	10890000	0	217840000	0	20972000	14685000	24954000	13024000	151960000	7794600	11411000	9824600	6297000	0	265280000	8778600	18007000	8376400	0	9461300
sp|P00931|TRP_YEAST	TRP	sp|P00931|TRP_YEAST	177150000	37330000	0	0	53970000	5061700	149880000	48123000	0	50638000	0	8829300	301970000	57199000	36091000	21219000	7760700	21570000	463250000	65771000	20646000	35659000	19442000	0
sp|P00937|TRPG_YEAST	TRPG	sp|P00937|TRPG_YEAST	46820000	0	0	0	0	0	49769000	0	0	0	0	0	0	0	0	0	0	0	40746000	0	0	0	0	0
sp|P00942|TPIS_YEAST	TPIS	sp|P00942|TPIS_YEAST	643580000	1090900000	1500000000	340670000	412030000	330400000	784960000	899680000	657310000	322640000	441510000	503710000	656400000	948120000	996820000	576600000	482860000	450080000	671760000	1347900000	876030000	518880000	576920000	474350000
sp|P00950|PMG1_YEAST	PMG1	sp|P00950|PMG1_YEAST	1699400000	1039600000	1168700000	464750000	249050000	199180000	989220000	867630000	524230000	464610000	349100000	471240000	769290000	1144800000	820520000	523530000	221510000	209330000	618670000	871180000	600690000	423370000	281480000	160840000
sp|P00958|SYMC_YEAST	SYMC	sp|P00958|SYMC_YEAST	44348000	0	0	0	0	0	68593000	0	0	0	0	0	55234000	0	0	0	0	0	58181000	16612000	0	0	0	0
sp|P01120|RAS2_YEAST	RAS2	sp|P01120|RAS2_YEAST	35838000	0	0	28301000	0	33604000	26699000	45736000	0	30283000	39897000	41002000	0	0	0	36832000	35106000	49132000	22962000	0	0	17187000	33151000	0
sp|P01123|YPT1_YEAST	YPT1	sp|P01123|YPT1_YEAST	82127000	94387000	44189000	81761000	81119000	101080000	64450000	95271000	0	69367000	59463000	0	0	0	49303000	57650000	71196000	85154000	84659000	0	0	53867000	76984000	85732000
sp|P02294|H2B2_YEAST;sp|P02293|H2B1_YEAST	H2B2	sp|P02294|H2B2_YEAST;sp|P02293|H2B1_YEAST	37622000	1088800000	2354900000	2457300000	1778700000	1266200000	105470000	874470000	1043400000	2343500000	1838700000	1594800000	84860000	2717400000	3969600000	3463000000	2199400000	2045300000	88586000	2090500000	958230000	2774200000	2340400000	2002700000
sp|P02309|H4_YEAST	H4	sp|P02309|H4_YEAST	70983000	1225900000	2209200000	2865800000	2255900000	1485000000	31681000	952820000	1404200000	3478500000	2728500000	1665600000	114890000	1418600000	2736400000	4572400000	2887400000	1678300000	106420000	1499000000	2260100000	4215700000	3176000000	2413100000
sp|P02381|RMAR_YEAST	RMAR	sp|P02381|RMAR_YEAST	0	242570000	134500000	442220000	737320000	116450000	0	311900000	172170000	462360000	997210000	195800000	0	424870000	68893000	300360000	559700000	255450000	14535000	376560000	57226000	270070000	837840000	344490000
sp|P02400|RLA4_YEAST	RLA4	sp|P02400|RLA4_YEAST	0	14844000	786880000	1016600000	2800000000	1715200000	0	11360000	249910000	1004700000	1940500000	1453500000	0	27269000	167620000	529620000	1118200000	519790000	0	74182000	88810000	1197000000	2340400000	2839100000
sp|P02406|RL28_YEAST	RL28	sp|P02406|RL28_YEAST	9665400	146490000	1353300000	14050000000	10870000000	18256000000	7982300	80777000	1299400000	14377000000	11956000000	19719000000	17888000	319860000	2315000000	7147700000	9581800000	15746000000	22049000	162460000	2063500000	8667800000	9082400000	18890000000
sp|P14127|RS17B_YEAST;sp|P02407|RS17A_YEAST	RS17B	sp|P14127|RS17B_YEAST;sp|P02407|RS17A_YEAST	3308000	539860000	534110000	15502000000	13540000000	21764000000	15047000	1049900000	313300000	16759000000	16191000000	17762000000	0	1185400000	443810000	9529700000	12162000000	23372000000	2317900	1291400000	500920000	10143000000	11529000000	25488000000
sp|P02557|TBB_YEAST	TBB	sp|P02557|TBB_YEAST	409710000	602960000	301440000	247100000	235580000	210160000	386180000	524720000	176180000	275310000	317650000	258020000	318880000	670650000	582600000	396750000	309150000	316550000	276630000	749920000	538300000	359200000	289150000	282710000
sp|P02829|HSP82_YEAST	HSP82	sp|P02829|HSP82_YEAST	936330000	112580000	85208000	78097000	74270000	68067000	810560000	114950000	81421000	57677000	94767000	121730000	1473300000	119810000	234610000	94285000	83343000	48578000	1308800000	175440000	106050000	82488000	68923000	51804000
sp|P02992|EFTU_YEAST	EFTU	sp|P02992|EFTU_YEAST	2688700000	259280000	380120000	229270000	192660000	239670000	2434100000	293250000	211020000	238100000	265160000	283810000	1301200000	252140000	172040000	163510000	134460000	140180000	1329200000	284920000	137130000	252490000	173890000	156260000
sp|P02994|EF1A_YEAST	EF1A	sp|P02994|EF1A_YEAST	23378000000	7456700000	5027400000	3916000000	4663300000	4205200000	23723000000	6516500000	4021000000	3559700000	5186100000	5273200000	18816000000	6544700000	4423400000	3552900000	3954800000	3308100000	18177000000	7005300000	4730900000	5137200000	5022300000	3899400000
sp|P03871|REP1_YEAST	REP1	sp|P03871|REP1_YEAST	0	0	0	0	0	0	0	0	0	0	0	0	0	0	0	0	0	0	0	0	0	11089000	0	0
sp|P03874|CBP2_YEAST	CBP2	sp|P03874|CBP2_YEAST	0	97194000	0	145440000	80311000	0	0	89086000	69959000	152120000	139850000	15411000	0	0	0	72045000	32097000	0	0	34834000	0	82761000	42017000	0
sp|P03878|SCE2_YEAST	SCE2	sp|P03878|SCE2_YEAST	0	13475000	0	0	0	0	0	25003000	0	0	0	0	0	0	6097800	0	0	0	0	0	0	0	0	0
sp|P03965|CARB_YEAST	CARB	sp|P03965|CARB_YEAST	379790000	28550000	15376000	26389000	23754000	22943000	314820000	14452000	0	49818000	25765000	10328000	136750000	9196600	9089800	19611000	12148000	11696000	151410000	9468800	0	21374000	20696000	13550000
sp|P04037|COX4_YEAST	COX4	sp|P04037|COX4_YEAST	22245000	333040000	403760000	236890000	1188800000	843250000	20220000	65071000	0	101440000	388580000	1554500000	10990000	42387000	109020000	1091000000	3812100000	1840300000	30023000	139710000	116830000	617610000	3599300000	1144100000
sp|P04039|COX8_YEAST	COX8	sp|P04039|COX8_YEAST	0	0	0	0	0	0	0	0	0	0	573840000	941010000	0	0	0	789420000	963610000	776840000	0	0	0	0	3223500000	1089100000
sp|P04046|PUR1_YEAST	PUR1	sp|P04046|PUR1_YEAST	164730000	105060000	65515000	46782000	58513000	43551000	162020000	126110000	53071000	57936000	64374000	65360000	217950000	117790000	111770000	76924000	55829000	48915000	178520000	91663000	0	62547000	85247000	62436000
sp|P04050|RPB1_YEAST	RPB1	sp|P04050|RPB1_YEAST	63049000	56895000	28734000	31534000	42654000	21024000	65431000	59336000	0	42472000	38636000	0	130240000	83190000	67674000	38472000	29696000	17758000	105270000	72573000	55704000	52728000	38543000	36565000
sp|P04051|RPC1_YEAST	RPC1	sp|P04051|RPC1_YEAST	0	72201000	17786000	0	0	0	0	129400000	25954000	0	0	0	0	34502000	0	0	0	0	0	22013000	0	0	0	0
sp|P04076|ARLY_YEAST	ARLY	sp|P04076|ARLY_YEAST	130960000	65711000	17618000	0	0	0	99817000	44708000	0	0	0	0	75040000	28055000	37169000	0	0	0	63235000	38295000	0	0	0	0
sp|P04147|PABP_YEAST	PABP	sp|P04147|PABP_YEAST	654030000	950920000	1678300000	2613300000	1709500000	405110000	538810000	1087000000	1796900000	3767900000	3333100000	1035800000	549740000	1278200000	2063700000	2805600000	1526300000	394800000	574530000	1221200000	1304600000	2347200000	1568700000	447400000
sp|P04449|RL24A_YEAST	RL24A	sp|P04449|RL24A_YEAST	0	0	74195000	1829400000	1380100000	3428400000	0	0	0	2504600000	1947900000	2023300000	0	0	17265000	1319400000	1517200000	2562600000	0	0	86738000	1498300000	1201300000	3054700000
sp|P04456|RL25_YEAST	RL25	sp|P04456|RL25_YEAST	8564800	380380000	6755900000	8261800000	15086000000	7385200000	5616100	362990000	2631300000	6433100000	7150700000	19422000000	0	979070000	5176800000	4902800000	9544000000	10560000000	0	531110000	2473200000	4747900000	7358900000	8607600000
sp|P04650|RL39_YEAST	RL39	sp|P04650|RL39_YEAST	0	0	228180000	894290000	832020000	2025100000	0	0	182290000	717380000	384270000	1131600000	0	0	90756000	484970000	400390000	525390000	0	0	233610000	640240000	562100000	767800000
sp|P04710|ADT1_YEAST	ADT1	sp|P04710|ADT1_YEAST	582440000	1006600000	631970000	1052900000	1424100000	1932000000	372400000	1050000000	352130000	760290000	1377900000	3138800000	371900000	338820000	218560000	473680000	645940000	685830000	549010000	405250000	523280000	632270000	688100000	1067600000
sp|P04801|SYTC_YEAST	SYTC	sp|P04801|SYTC_YEAST	520330000	70593000	32769000	61225000	31764000	72686000	492410000	172420000	45447000	44382000	132060000	21586000	647430000	313550000	124600000	102390000	64328000	116770000	527870000	217710000	52029000	156400000	89546000	88258000
sp|P04802|SYDC_YEAST	SYDC	sp|P04802|SYDC_YEAST	734190000	183790000	252740000	138470000	155190000	94172000	561690000	236250000	147200000	199890000	163160000	127000000	930960000	304370000	294020000	209450000	151200000	93384000	784080000	166740000	196980000	179110000	172240000	146990000
sp|P04803|SYWM_YEAST	SYWM	sp|P04803|SYWM_YEAST	85966000	0	0	0	0	0	91231000	37929000	0	0	0	0	41858000	0	0	0	0	0	38007000	0	0	0	0	0
sp|P04806|HXKA_YEAST	HXKA	sp|P04806|HXKA_YEAST	6282000000	918490000	621880000	375930000	360120000	341210000	6542200000	825920000	413520000	393030000	445370000	497030000	3947100000	614230000	400890000	242560000	154640000	142660000	4009100000	459990000	356090000	254310000	160410000	152120000
sp|P04807|HXKB_YEAST	HXKB	sp|P04807|HXKB_YEAST	1623800000	172790000	117390000	93673000	74222000	61772000	1727400000	213280000	19776000	93172000	98717000	102570000	2164700000	201460000	129600000	150570000	78148000	65487000	2067000000	230910000	155360000	144840000	111640000	85722000
sp|P04819-2|DNLI1_YEAST;sp|P04819|DNLI1_YEAST	DNLI1	sp|P04819-2|DNLI1_YEAST;sp|P04819|DNLI1_YEAST	0	0	0	0	0	0	0	0	0	0	0	0	0	0	0	0	0	0	10769000	0	0	0	0	0
sp|P04840|VDAC1_YEAST	VDAC1	sp|P04840|VDAC1_YEAST	1619200000	5272700000	8284100000	24828000000	67845000000	133850000000	1000700000	3891100000	3877000000	9344000000	38800000000	100340000000	2459500000	6476300000	12633000000	59243000000	186860000000	215520000000	3147000000	8835600000	18042000000	77142000000	179060000000	189900000000
sp|P04912|H2A2_YEAST;sp|P04911|H2A1_YEAST	H2A2	sp|P04912|H2A2_YEAST;sp|P04911|H2A1_YEAST	0	368160000	1230900000	979820000	674160000	668720000	0	299350000	693180000	1133700000	1118400000	772690000	0	471120000	947820000	1443200000	869130000	759140000	74593000	387960000	617510000	1318200000	1014900000	815530000
sp|P05030|PMA1_YEAST;sp|P19657|PMA2_YEAST	PMA1	sp|P05030|PMA1_YEAST;sp|P19657|PMA2_YEAST	3061400000	16183000000	12830000000	12391000000	11912000000	16759000000	2976000000	14092000000	9615800000	10375000000	12816000000	14658000000	2097800000	10605000000	8335600000	6754300000	6397800000	9210300000	1973000000	11022000000	9506800000	8239700000	7678800000	8514800000
sp|P05150|OTC_YEAST	OTC	sp|P05150|OTC_YEAST	0	0	0	0	0	0	0	0	0	0	0	0	17468000	0	0	0	0	0	0	0	0	0	0	0
sp|P05317|RLA0_YEAST	RLA0	sp|P05317|RLA0_YEAST	139140000	1107500000	4645500000	22651000000	18666000000	30646000000	113940000	904230000	4494800000	25964000000	20850000000	37765000000	137620000	1431000000	5040400000	13563000000	16008000000	27872000000	203910000	1334500000	4106400000	14718000000	15789000000	31680000000
sp|P05318|RLA1_YEAST	RLA1	sp|P05318|RLA1_YEAST	14945000	0	0	494870000	498670000	1851300000	0	0	163450000	616230000	393170000	395460000	0	0	0	96596000	401950000	715590000	0	7484100	0	330290000	530710000	846810000
sp|P05319|RLA2_YEAST	RLA2	sp|P05319|RLA2_YEAST	20326000	0	124660000	890330000	1715200000	2681700000	0	0	108550000	1180100000	1678300000	984900000	20511000	0	67374000	417850000	1076900000	1098700000	94204000	60545000	121040000	1216300000	1739200000	2480500000
sp|P05373|HEM2_YEAST	HEM2	sp|P05373|HEM2_YEAST	414410000	146650000	0	21581000	25957000	33298000	342840000	174160000	25775000	24426000	30180000	0	166270000	62427000	0	26761000	0	0	104740000	51600000	25265000	22041000	20022000	0
sp|P05375|PEM2_YEAST	PEM2	sp|P05375|PEM2_YEAST	0	0	0	0	0	0	0	0	0	0	0	0	0	0	0	0	0	0	0	0	0	0	18045000	0
sp|P05453|ERF3_YEAST	ERF3	sp|P05453|ERF3_YEAST	227460000	44334000	0	18542000	0	0	215090000	31228000	0	0	22539000	0	307590000	142460000	61270000	33185000	25897000	25655000	264770000	39204000	0	29043000	29281000	0
sp|P05626|ATPF_YEAST	ATPF	sp|P05626|ATPF_YEAST	690930000	1290300000	793020000	1358800000	825020000	555800000	750230000	805910000	645000000	1021900000	805290000	671640000	1428900000	3095600000	1623500000	2664000000	2474500000	2011000000	1229400000	2741900000	3274700000	3686000000	2160000000	1575300000
sp|P05694|METE_YEAST	METE	sp|P05694|METE_YEAST	1317200000	40758000	77093000	79766000	43379000	5636700	1776500000	151290000	61675000	118390000	57563000	10520000	1213800000	139790000	12141000	30177000	14715000	4070800	1514600000	71286000	88842000	118400000	31528000	17940000
sp|P05737|RL7A_YEAST	RL7A	sp|P05737|RL7A_YEAST	22483000	1090200000	8124100000	41020000000	31411000000	53633000000	7443400	1020900000	7884500000	42034000000	37074000000	56178000000	16094000	1525000000	8719600000	21233000000	26854000000	46262000000	29400000	1235800000	5746400000	24381000000	23247000000	49278000000
sp|P05738|RL9A_YEAST	RL9A	sp|P05738|RL9A_YEAST	32291000	0	38238000	1204200000	919990000	2879300000	0	0	0	1999700000	1291300000	1961800000	48167000	0	0	1114900000	1626900000	2891400000	18055000	0	0	1439500000	1063100000	2827800000
sp|P05739|RL6B_YEAST	RL6B	sp|P05739|RL6B_YEAST	41328000	1183200000	4788700000	21359000000	16651000000	28292000000	24163000	1009200000	5563700000	23342000000	18313000000	29965000000	19536000	1174500000	7260300000	13343000000	16854000000	25062000000	26101000	1075700000	4420000000	13316000000	13958000000	26947000000
sp|P05740|RL17A_YEAST	RL17A	sp|P05740|RL17A_YEAST	0	0	0	0	0	0	0	0	0	0	0	0	0	0	0	0	0	0	0	0	0	0	0	21439000
sp|P05744|RL33A_YEAST	RL33A	sp|P05744|RL33A_YEAST	11199000	152650000	1668500000	10784000000	8414600000	13519000000	3212900	179010000	1564400000	12550000000	10086000000	17204000000	8327800	281830000	1980900000	6334600000	7751000000	13319000000	9303600	232450000	1385100000	7129500000	7003300000	14613000000
sp|P05745|RL36A_YEAST	RL36A	sp|P05745|RL36A_YEAST	0	0	0	567960000	425320000	612200000	0	0	0	573110000	493340000	759070000	0	0	56758000	180250000	399350000	152690000	0	0	0	49222000	315790000	923410000
sp|P05747|RL29_YEAST	RL29	sp|P05747|RL29_YEAST	0	0	0	725560000	170210000	1536300000	0	0	233900000	742080000	529140000	253450000	0	0	97200000	425260000	521760000	571960000	0	0	179160000	439020000	207930000	698850000
sp|P05748|RL15A_YEAST	RL15A	sp|P05748|RL15A_YEAST	0	0	0	0	0	0	0	0	0	0	0	0	0	0	0	0	0	0	0	0	0	0	0	5847300000
sp|P05749|RL22A_YEAST	RL22A	sp|P05749|RL22A_YEAST	79707000	127820000	495140000	5539600000	4907200000	8424800000	68411000	54214000	600400000	5873200000	5322800000	7883400000	59643000	84588000	431790000	2890800000	4254900000	6236700000	72321000	113970000	712420000	4139300000	4271700000	7686700000
sp|P05750|RS3_YEAST	RS3	sp|P05750|RS3_YEAST	262770000	7101200000	3169800000	31509000000	31544000000	42424000000	215590000	6799000000	2928700000	32730000000	32851000000	60134000000	220890000	8546000000	4602900000	20369000000	26389000000	42615000000	240420000	10489000000	2592300000	21245000000	26524000000	49976000000
sp|P05755|RS9B_YEAST	RS9B	sp|P05755|RS9B_YEAST	157680000	2745700000	1702200000	25362000000	22541000000	37147000000	126200000	2686600000	1680100000	26388000000	23785000000	42404000000	165890000	4179500000	1900900000	16125000000	18556000000	35588000000	126280000	4373300000	2614900000	17137000000	18026000000	36192000000
sp|P05756|RS13_YEAST	RS13	sp|P05756|RS13_YEAST	63423000	1478000000	1483700000	17354000000	15022000000	26609000000	37207000	1939900000	890970000	21777000000	18945000000	29250000000	30191000	1881700000	1537600000	11023000000	13369000000	22934000000	14537000	2531500000	1524000000	12336000000	12729000000	27738000000
sp|P05759|RS27A_YEAST;sp|P0CH09|RL402_YEAST;sp|P0CH08|RL401_YEAST;sp|P0CG63|UBI4P_YEAST	RS27A	sp|P05759|RS27A_YEAST;sp|P0CH09|RL402_YEAST;sp|P0CH08|RL401_YEAST;sp|P0CG63|UBI4P_YEAST	420290000	2906000000	1210200000	1245600000	1269100000	2215600000	480530000	3053000000	1113600000	1344000000	988840000	1689600000	605640000	2226000000	1857700000	1474100000	1732900000	3294500000	507410000	3617700000	2275400000	1531300000	1625400000	2312000000
sp|P06101|CDC37_YEAST	CDC37	sp|P06101|CDC37_YEAST	135030000	21363000	0	0	0	0	105660000	16492000	0	0	0	0	147180000	19324000	22608000	0	0	0	115130000	19200000	0	0	0	0
sp|P06102|NOT3_YEAST	NOT3	sp|P06102|NOT3_YEAST	39565000	0	0	0	0	0	36924000	0	0	0	0	0	52789000	0	0	0	0	0	43845000	0	0	0	0	0
sp|P06103|EIF3B_YEAST	EIF3B	sp|P06103|EIF3B_YEAST	359700000	74390000	49145000	59063000	30092000	36370000	338420000	133290000	63791000	36325000	52056000	39340000	542660000	151270000	94222000	75592000	31441000	0	438990000	110720000	75350000	64542000	50442000	38446000
sp|P06105|SC160_YEAST	SC160	sp|P06105|SC160_YEAST	2444500000	315800000	120590000	60066000	295390000	0	2710000000	358950000	12471000	39767000	95132000	157020000	3615500000	424900000	225870000	22709000	0	0	3300900000	191920000	0	15243000	0	0
sp|P06106|MET17_YEAST	MET17	sp|P06106|MET17_YEAST	683690000	327390000	105730000	79629000	80076000	49566000	696200000	348590000	171790000	79273000	39957000	46182000	927680000	460360000	381840000	156760000	54982000	55683000	835150000	337950000	172030000	176120000	133520000	90744000
sp|P06115|CATT_YEAST	CATT	sp|P06115|CATT_YEAST	31720000	57017000	0	0	0	0	0	91560000	0	48985000	32462000	0	0	41213000	0	0	0	0	0	28126000	0	0	0	0
sp|P06168|ILV5_YEAST	ILV5	sp|P06168|ILV5_YEAST	2962000000	1010500000	519170000	263190000	203870000	169500000	2805800000	886090000	601050000	274700000	241790000	333340000	2284400000	735170000	625940000	264860000	179740000	204580000	2353500000	733910000	526680000	262980000	251280000	269100000
sp|P06169|PDC1_YEAST;sp|P26263|PDC6_YEAST	PDC1	sp|P06169|PDC1_YEAST	10252000000	3251900000	2310900000	1990300000	2299200000	1743800000	11221000000	3035400000	2671900000	2009700000	2578800000	2211700000	11506000000	3200200000	2580100000	2301900000	1651200000	1655700000	11095000000	3359600000	2689200000	2378000000	2188800000	1900400000
sp|P06174|HEM4_YEAST	HEM4	sp|P06174|HEM4_YEAST	0	0	0	0	0	0	0	0	0	0	0	0	0	0	0	0	0	0	4744400	0	0	0	0	0
sp|P06182|CCHL_YEAST	CCHL	sp|P06182|CCHL_YEAST	26909000	0	0	0	0	0	23286000	0	0	0	0	0	0	0	0	0	0	0	7551400	0	0	0	0	0
sp|P06197|PIS_YEAST	PIS	sp|P06197|PIS_YEAST	0	0	0	0	50150000	76873000	0	0	0	0	0	56639000	0	0	0	35858000	50700000	51490000	0	0	0	0	54566000	0
sp|P06208-2|LEU1_YEAST;sp|P06208|LEU1_YEAST	LEU1	sp|P06208-2|LEU1_YEAST;sp|P06208|LEU1_YEAST	723030000	126440000	24783000	76379000	64951000	51232000	697980000	203280000	28278000	108230000	45201000	55990000	907500000	109290000	62462000	127310000	73044000	88660000	749060000	175680000	100410000	112350000	110890000	76426000
sp|P06243|CDC7_YEAST	CDC7	sp|P06243|CDC7_YEAST	0	0	0	0	0	0	0	0	0	0	0	0	0	0	0	0	0	0	5509900	0	0	0	0	0
sp|P06244|KAPA_YEAST	KAPA	sp|P06244|KAPA_YEAST	0	0	0	0	0	0	0	0	0	0	0	0	0	0	0	0	0	0	32032000	0	0	0	0	0
sp|P06245|KAPB_YEAST;sp|P05986|KAPC_YEAST	KAPB	sp|P06245|KAPB_YEAST	48584000	0	0	0	0	0	39607000	20207000	0	0	0	0	17721000	19150000	0	0	0	0	0	0	0	0	0	0
sp|P06634|DED1_YEAST	DED1	sp|P06634|DED1_YEAST	726380000	167040000	108300000	115210000	128190000	99108000	658090000	219370000	160200000	112640000	149710000	119670000	763400000	173340000	139790000	115090000	88093000	88826000	550170000	143250000	75388000	100650000	129780000	92709000
sp|P06704|CDC31_YEAST	CDC31	sp|P06704|CDC31_YEAST	0	0	0	0	0	0	0	0	0	0	0	0	0	0	0	2826400	0	0	0	0	0	0	0	0
sp|P06738|PHSG_YEAST	PHSG	sp|P06738|PHSG_YEAST	1435100000	1864800000	756920000	488200000	441260000	318270000	1466700000	2257800000	694610000	593500000	474180000	457210000	2344500000	1651300000	1279400000	645660000	421850000	440660000	2134900000	1228900000	660870000	596720000	524750000	463550000
sp|P06778-3|RAD52_YEAST;sp|P06778-2|RAD52_YEAST;sp|P06778|RAD52_YEAST	RAD52	sp|P06778-3|RAD52_YEAST;sp|P06778-2|RAD52_YEAST;sp|P06778|RAD52_YEAST	32196000	190020000	53624000	0	0	0	87209000	121770000	0	0	0	0	57749000	0	74697000	0	0	0	61437000	76703000	0	0	0	0
sp|P06780|RHO1_YEAST	RHO1	sp|P06780|RHO1_YEAST	85658000	222160000	249430000	159940000	258020000	144820000	73804000	205210000	174200000	121490000	221360000	311150000	131850000	175170000	171330000	162410000	181810000	121590000	155260000	119660000	165730000	153620000	156090000	110050000
sp|P06782|SNF1_YEAST	SNF1	sp|P06782|SNF1_YEAST	41405000	0	0	0	0	0	41894000	26853000	0	0	0	0	40619000	17767000	0	0	0	0	38150000	16695000	0	0	0	0
sp|P06785|TYSY_YEAST	TYSY	sp|P06785|TYSY_YEAST	7852900	0	0	0	0	0	0	0	0	0	0	0	0	0	0	0	0	0	0	0	0	0	0	0
sp|P06786|TOP2_YEAST	TOP2	sp|P06786|TOP2_YEAST	0	41375000	29294000	0	17865000	0	0	51419000	0	30162000	25490000	0	25553000	76202000	32937000	29060000	0	0	0	36737000	29529000	22034000	0	0
sp|P07143|CY1_YEAST	CY1	sp|P07143|CY1_YEAST	1283000000	7113500000	8048400000	6099500000	7813400000	11047000000	976870000	3842300000	3731900000	4017900000	6150700000	9750800000	600980000	3183900000	2495800000	6341800000	14894000000	14105000000	625050000	4694600000	4117800000	6185400000	13043000000	9103100000
sp|P07149|FAS1_YEAST	FAS1	sp|P07149|FAS1_YEAST	330470000	90619000000	18659000000	2735900000	1342900000	789470000	272770000	99450000000	29119000000	4171300000	1998600000	1228300000	315130000	69087000000	21813000000	2790700000	1034300000	655650000	224770000	85065000000	14247000000	2371000000	1137500000	766350000
sp|P07170|KAD2_YEAST	KAD2	sp|P07170|KAD2_YEAST	393350000	44561000	0	0	0	14236000	938730000	0	0	0	0	11717000	485440000	24630000	0	0	0	0	283170000	16178000	0	0	0	0
sp|P07172|HIS8_YEAST	HIS8	sp|P07172|HIS8_YEAST	61454000	26410000	0	20975000	0	0	65000000	17187000	0	0	0	0	70514000	0	0	0	0	0	80464000	0	0	0	0	0
sp|P07213|TOM70_YEAST	TOM70	sp|P07213|TOM70_YEAST	732770000	789300000	453170000	473810000	517790000	524740000	658990000	890400000	661060000	525030000	554510000	866320000	550800000	308900000	242390000	241270000	352980000	367960000	580800000	312680000	243630000	184690000	266700000	238150000
sp|P07236|SYTM_YEAST	SYTM	sp|P07236|SYTM_YEAST	354170000	0	0	0	0	0	275730000	130460000	0	0	0	0	0	0	0	0	0	0	168940000	0	0	0	0	0
sp|P07244|PUR2_YEAST	PUR2	sp|P07244|PUR2_YEAST	694330000	382860000	246340000	143410000	155990000	139860000	587060000	388200000	97835000	177370000	221940000	223260000	577800000	351230000	276890000	192460000	140550000	103750000	522710000	448880000	215540000	208070000	119540000	55672000
sp|P07245|C1TC_YEAST	C1TC	sp|P07245|C1TC_YEAST	618980000	148340000	128320000	28450000	64560000	24555000	700690000	176860000	106160000	93677000	77924000	83577000	1161900000	304270000	264420000	239950000	109290000	60555000	1407300000	238370000	48369000	203810000	121360000	48713000
sp|P07246|ADH3_YEAST	ADH3	sp|P07246|ADH3_YEAST	1646500000	674930000	578980000	366950000	257140000	350520000	1229600000	780760000	258220000	407380000	319780000	276130000	1119300000	607550000	731550000	343250000	199490000	104550000	1091800000	620760000	212550000	371210000	201210000	171620000
sp|P07248|ADR1_YEAST	ADR1	sp|P07248|ADR1_YEAST	0	0	0	0	0	0	0	0	0	0	0	0	0	0	0	0	0	0	19552000	0	0	0	0	0
sp|P07251|ATPA_YEAST	ATPA	sp|P07251|ATPA_YEAST	13602000000	29623000000	16292000000	9426100000	5092000000	3718700000	13687000000	31968000000	13161000000	7987000000	6425100000	5214400000	8297700000	69210000000	34025000000	18039000000	14956000000	8266500000	8743000000	74697000000	48881000000	23538000000	11177000000	6340400000
sp|P07252|CBP1_YEAST	CBP1	sp|P07252|CBP1_YEAST	0	0	0	0	0	0	0	0	0	42868000	37587000	0	0	0	0	45679000	0	0	0	0	0	0	0	0
sp|P07253|CBP6_YEAST	CBP6	sp|P07253|CBP6_YEAST	48700000	0	0	0	0	0	64394000	0	0	0	0	0	0	0	0	0	0	0	0	0	0	0	0	0
sp|P07255|COX9_YEAST	COX9	sp|P07255|COX9_YEAST	0	0	0	210670000	370450000	757040000	0	0	0	0	164740000	0	0	0	0	494730000	1543400000	726140000	110010000	109640000	0	633730000	1436400000	414360000
sp|P07256|QCR1_YEAST	QCR1	sp|P07256|QCR1_YEAST	2254800000	19674000000	12431000000	13918000000	20465000000	31769000000	1529600000	10072000000	7493500000	8716600000	15236000000	20787000000	1093200000	7019400000	8306300000	12966000000	39927000000	41607000000	1338300000	14279000000	11399000000	16882000000	37745000000	29874000000
sp|P07257|QCR2_YEAST	QCR2	sp|P07257|QCR2_YEAST	2351400000	10899000000	13659000000	14344000000	19487000000	28776000000	1461600000	7859900000	6878100000	8456900000	13894000000	23321000000	915270000	5403400000	5904800000	11197000000	35847000000	36314000000	1162700000	8937400000	12594000000	15370000000	31522000000	25499000000
sp|P07259|PYR1_YEAST	PYR1	sp|P07259|PYR1_YEAST	1882400000	2267600000	1090900000	1083200000	974060000	708720000	1790600000	2295300000	1095100000	1126100000	1157500000	933310000	6867900000	7782400000	6075800000	4860400000	3168700000	2672700000	6305300000	8681300000	7024600000	5098900000	3853300000	3160900000
sp|P07260|IF4E_YEAST	IF4E	sp|P07260|IF4E_YEAST	637760000	44399000	54898000	12945000	25108000	8232000	616770000	127390000	36227000	17977000	15944000	27905000	507820000	50997000	101050000	18004000	0	0	720020000	44803000	60508000	22978000	0	0
sp|P07262|DHE4_YEAST	DHE4	sp|P07262|DHE4_YEAST	2340400000	1680100000	904180000	543130000	434310000	387830000	2413400000	2120000000	893370000	691760000	496070000	544040000	1349400000	1032000000	621000000	330940000	240350000	245350000	643390000	513280000	231960000	192770000	132530000	152760000
sp|P07263-2|SYH_YEAST;sp|P07263|SYH_YEAST	SYH	sp|P07263-2|SYH_YEAST;sp|P07263|SYH_YEAST	140260000	53950000	0	20299000	19469000	0	169430000	60431000	0	13227000	0	0	188430000	40242000	57858000	33125000	14720000	0	311500000	31505000	17005000	16399000	0	0
sp|P07264|LEUC_YEAST	LEUC	sp|P07264|LEUC_YEAST	1398800000	375110000	108970000	95692000	111120000	97793000	1478500000	407420000	66992000	121590000	166280000	101080000	1145500000	216660000	29680000	76346000	26858000	46889000	1141900000	136950000	22987000	37050000	34153000	30575000
sp|P07267|CARP_YEAST	CARP	sp|P07267|CARP_YEAST	201700000	392940000	341940000	104280000	113050000	80182000	235720000	231250000	127950000	89367000	100460000	140050000	294000000	190330000	188400000	132500000	85017000	92102000	328330000	325580000	99138000	125310000	95304000	85221000
sp|P07274|PROF_YEAST	PROF	sp|P07274|PROF_YEAST	69578000	3254400	0	2738800	4536500	4121000	80621000	3846000	0	3049400	5194900	4865000	51164000	0	0	2695000	3606300	0	41260000	3221700	0	3858100	0	0
sp|P07275|PUT2_YEAST	PUT2	sp|P07275|PUT2_YEAST	40829000	247820000	51119000	18626000	18373000	0	73002000	399040000	67415000	65841000	20257000	28475000	27350000	270890000	55251000	23565000	19782000	0	67868000	151920000	68951000	26728000	23364000	28121000
sp|P07277|KIME_YEAST	KIME	sp|P07277|KIME_YEAST	20239000	0	0	0	0	0	20496000	0	0	0	0	0	24035000	0	0	0	0	0	20288000	0	0	0	0	0
sp|P07278|KAPR_YEAST	KAPR	sp|P07278|KAPR_YEAST	631090000	23551000	0	0	0	0	578910000	39224000	0	7088300	19397000	0	212230000	19524000	88648000	16298000	0	0	461840000	26853000	0	10232000	0	0
sp|P07281|RS19B_YEAST;sp|P07280|RS19A_YEAST	RS19B	sp|P07281|RS19B_YEAST;sp|P07280|RS19A_YEAST	185140000	2974800000	1467600000	22368000000	18136000000	30805000000	105680000	3883900000	1365600000	23612000000	19252000000	28320000000	296660000	4719800000	2020200000	12151000000	16028000000	27823000000	130360000	4638800000	1180800000	12265000000	14745000000	31255000000
sp|P07283|PMM_YEAST	PMM	sp|P07283|PMM_YEAST	831350000	299610000	272960000	145800000	149140000	124380000	820460000	248780000	158890000	147320000	155220000	138500000	1239100000	320440000	338720000	213090000	170500000	149480000	1286500000	372960000	262440000	259310000	231250000	198200000
sp|P07284|SYSC_YEAST	SYSC	sp|P07284|SYSC_YEAST	736450000	8883300	12441000	27351000	13691000	15724000	412640000	18994000	0	62636000	22898000	0	569380000	28742000	12123000	19031000	14571000	7918700	476300000	11490000	0	64959000	0	7645100
sp|P07285|TRPD_YEAST	TRPD	sp|P07285|TRPD_YEAST	11504000	0	0	0	0	0	10777000	0	0	0	0	0	11517000	0	0	0	0	0	11294000	0	0	0	0	0
sp|P07342|ILVB_YEAST	ILVB	sp|P07342|ILVB_YEAST	623110000	38670000	34583000	0	18123000	31084000	586990000	38534000	22675000	69049000	68066000	51461000	238360000	18295000	33581000	17104000	13118000	28318000	247330000	0	0	27335000	29899000	49992000
sp|P07347|ARD1_YEAST	ARD1	sp|P07347|ARD1_YEAST	29835000	0	0	0	0	0	27301000	0	0	0	0	0	24941000	0	0	0	0	0	25639000	0	0	0	0	0
sp|P07560|SEC4_YEAST;sp|Q99260|YPT6_YEAST	SEC4	sp|P07560|SEC4_YEAST	190880000	80191000	96679000	85928000	110770000	94746000	166780000	70773000	95608000	73413000	90999000	142300000	122210000	75424000	102490000	97392000	124560000	127470000	143310000	65319000	84936000	90062000	106110000	101460000
sp|P07702|LYS2_YEAST	LYS2	sp|P07702|LYS2_YEAST	91312000	0	0	0	0	0	85459000	0	0	0	0	0	129360000	0	0	0	0	0	97679000	0	0	0	0	0
sp|P07703|RPAC1_YEAST	RPAC1	sp|P07703|RPAC1_YEAST	52444000	54089000	0	0	0	0	55305000	61271000	0	22838000	0	0	0	0	0	0	0	0	0	0	0	0	0	0
sp|P07806-2|SYV_YEAST;sp|P07806|SYV_YEAST	SYV	sp|P07806-2|SYV_YEAST;sp|P07806|SYV_YEAST	1077700000	24469000	10539000	5235000	4338900	1253400	981730000	30666000	0	4294200	4642000	3068000	1027700000	47547000	9589400	5518400	0	1351600	700100000	10822000	3813500	9531600	0	0
sp|P07991|OAT_YEAST	OAT	sp|P07991|OAT_YEAST	1655600000	568770000	324860000	331280000	329860000	236700000	1736300000	705860000	471740000	365830000	343630000	336060000	1435800000	691740000	627460000	476260000	390590000	343890000	1846900000	662610000	505480000	496100000	391580000	348080000
sp|P08004|CHS1_YEAST	CHS1	sp|P08004|CHS1_YEAST	0	0	0	22070000	31848000	69978000	0	0	0	18033000	24469000	0	0	0	0	28615000	38709000	69160000	0	0	0	21614000	30210000	31233000
sp|P08067|UCRI_YEAST	UCRI	sp|P08067|UCRI_YEAST	288510000	581380000	785300000	764980000	1528900000	1663400000	121290000	280280000	193200000	555040000	794090000	1740000000	350810000	286870000	187370000	905670000	3524600000	2305600000	81670000	369650000	272750000	802210000	2333300000	1471100000
sp|P08417|FUMH_YEAST	FUMH	sp|P08417|FUMH_YEAST	2440000000	466490000	165510000	162540000	51792000	33462000	1439500000	484570000	78570000	156820000	89217000	96501000	2293400000	592400000	456150000	98288000	57694000	28673000	1939000000	401790000	174530000	161620000	37852000	18227000
sp|P08425|SYFM_YEAST	SYFM	sp|P08425|SYFM_YEAST	106220000	0	0	0	0	0	103490000	0	0	0	0	0	62607000	0	0	0	0	0	63035000	0	0	0	0	0
sp|P08456|PSS_YEAST	PSS	sp|P08456|PSS_YEAST	0	0	0	20753000	0	35754000	0	0	0	20723000	23163000	0	0	0	0	0	0	38113000	0	0	0	0	23883000	0
sp|P08459|SPS2_YEAST	SPS2	sp|P08459|SPS2_YEAST	0	0	0	21010000	47129000	166160000	17462000	0	0	16780000	32532000	57250000	35333000	51455000	76954000	149900000	170360000	345350000	0	31421000	0	67850000	66819000	111550000
sp|P08466|NUC1_YEAST	NUC1	sp|P08466|NUC1_YEAST	107920000	129520000	101540000	104400000	118790000	122380000	88671000	93037000	82865000	90520000	104430000	210530000	103640000	42013000	45551000	65430000	113600000	113230000	88141000	41474000	62798000	73692000	92075000	74105000
sp|P08518|RPB2_YEAST	RPB2	sp|P08518|RPB2_YEAST	63631000	72741000	0	33417000	33953000	68283000	53422000	46578000	0	30478000	36350000	54218000	94217000	74787000	55208000	63318000	42407000	45973000	82664000	39280000	70114000	57371000	45077000	57393000
sp|P08524|FPPS_YEAST	FPPS	sp|P08524|FPPS_YEAST	118300000	17381000	41436000	15020000	10700000	13767000	218600000	18502000	23967000	6514700	12756000	16921000	277920000	36156000	37097000	0	0	0	325650000	39097000	0	5557600	7405400	0
sp|P08525|QCR8_YEAST	QCR8	sp|P08525|QCR8_YEAST	79079000	1190200000	0	484790000	881330000	1102400000	25457000	314260000	153200000	226630000	337900000	242710000	17071000	349430000	0	674030000	1470900000	1044700000	29692000	877900000	441340000	544210000	1232200000	577480000
sp|P08536|MET3_YEAST	MET3	sp|P08536|MET3_YEAST	15944000	0	0	0	0	0	22691000	14366000	0	0	0	0	24593000	0	0	0	0	0	0	0	0	0	0	0
sp|P08566|ARO1_YEAST	ARO1	sp|P08566|ARO1_YEAST	560670000	221950000	133470000	148350000	129810000	118550000	521450000	252860000	117540000	160480000	163790000	32655000	560940000	224310000	172300000	135690000	68837000	85040000	513090000	175450000	148030000	160000000	85155000	96695000
sp|P08640|MUC1_YEAST	MUC1	sp|P08640|MUC1_YEAST	0	0	0	0	117580000	0	0	0	96485000	118330000	190830000	91667000	0	0	47355000	0	106600000	27533000	0	0	0	93462000	112430000	0
sp|P08679|CISY2_YEAST	CISY2	sp|P08679|CISY2_YEAST	999450000	261560000	123360000	102000000	147560000	245550000	1150000000	281900000	89406000	117390000	148200000	268810000	1011700000	276380000	195530000	127270000	104020000	296940000	1168300000	207430000	154980000	129200000	131680000	346600000
sp|P09032|EI2BG_YEAST	EI2BG	sp|P09032|EI2BG_YEAST	0	0	0	0	0	0	0	0	0	0	0	0	0	0	0	0	0	0	4626400	0	0	0	0	0
sp|P09064|IF2B_YEAST	IF2B	sp|P09064|IF2B_YEAST	31472000	0	0	0	0	0	43038000	0	0	0	0	0	0	0	0	0	0	0	20158000	0	0	0	21670000	0
sp|P09201|F16P_YEAST	F16P	sp|P09201|F16P_YEAST	1511500000	591020000	378620000	242370000	234170000	198530000	896780000	563930000	391440000	245430000	225010000	235710000	1054100000	512290000	375670000	259360000	168880000	142550000	1148000000	401430000	306970000	221810000	147910000	151860000
sp|P09232|PRTB_YEAST	PRTB	sp|P09232|PRTB_YEAST	465530000	553490000	509410000	72035000	99162000	130650000	504690000	230320000	120300000	68906000	91778000	160710000	266510000	233530000	287380000	89918000	65969000	105590000	181300000	381700000	153990000	84808000	68560000	103240000
sp|P09435|HSP73_YEAST	HSP73	sp|P09435|HSP73_YEAST	203420000	39782000	62859000	74196000	53467000	45465000	79604000	10431000	0	27957000	21854000	31550000	305990000	36007000	85751000	59326000	0	22441000	460290000	67131000	62349000	46463000	68053000	36717000
sp|P09436|SYIC_YEAST	SYIC	sp|P09436|SYIC_YEAST	455640000	17549000	19546000	7963600	10541000	7559900	372530000	36923000	0	14937000	7886400	0	567530000	56094000	23165000	71291000	59309000	13761000	614670000	83907000	24222000	65352000	22916000	40491000
sp|P09440|C1TM_YEAST	C1TM	sp|P09440|C1TM_YEAST	43831000	480160000	68692000	31360000	58813000	35352000	57690000	490300000	120860000	44255000	82611000	0	44662000	165880000	0	24678000	34322000	0	46806000	158540000	0	35402000	0	28370000
sp|P09457|ATPO_YEAST	ATPO	sp|P09457|ATPO_YEAST	452920000	899070000	572010000	516370000	310710000	167140000	501110000	459340000	223500000	515530000	315480000	209260000	527500000	1940400000	829050000	1360500000	885920000	473940000	544780000	1925700000	1179400000	1457500000	609060000	421590000
sp|P09624|DLDH_YEAST	DLDH	sp|P09624|DLDH_YEAST	808040000	16517000000	16581000000	5295500000	1046200000	497550000	491790000	14513000000	15491000000	6913000000	1273500000	664670000	650070000	8892800000	21609000000	3703600000	648080000	424010000	525170000	8676900000	14231000000	3693500000	694880000	456700000
sp|P09733|TBA1_YEAST	TBA1	sp|P09733|TBA1_YEAST	479390000	276040000	196560000	239710000	229450000	202910000	464610000	334480000	231480000	250900000	283660000	258400000	437430000	568920000	375710000	459380000	322250000	318190000	445930000	486310000	503350000	378010000	305150000	288030000
sp|P09734|TBA3_YEAST	TBA3	sp|P09734|TBA3_YEAST	88606000	58097000	44846000	33520000	57027000	0	90623000	39739000	0	41642000	45685000	0	95279000	112140000	108780000	81719000	51245000	43537000	96369000	87691000	57758000	64243000	49142000	62293000
sp|P09937|SPS4_YEAST	SPS4	sp|P09937|SPS4_YEAST	37648000	39182000	87032000	127120000	121130000	118600000	41470000	86544000	91147000	107520000	150330000	83931000	24784000	245000000	166640000	264850000	182720000	198780000	52111000	105900000	104740000	132360000	109840000	89866000
sp|P09938|RIR2_YEAST	RIR2	sp|P09938|RIR2_YEAST	355560000	18794000	0	13077000	9887300	0	441890000	19807000	19876000	2330000	2390100	0	1093100000	62260000	18485000	27647000	1378200	4949200	1041800000	36151000	22726000	21679000	2586800	2536800
sp|P09950|HEM1_YEAST	HEM1	sp|P09950|HEM1_YEAST	0	0	0	0	0	0	0	0	0	0	0	0	0	0	0	0	0	0	2495400	0	0	0	0	0
sp|P09959|SWI6_YEAST	SWI6	sp|P09959|SWI6_YEAST	0	0	0	0	0	0	0	0	0	0	0	0	0	0	0	0	0	0	52819000	0	0	0	0	0
sp|Q3E792|RS25A_YEAST;sp|P0C0T4|RS25B_YEAST	RS25A	sp|Q3E792|RS25A_YEAST;sp|P0C0T4|RS25B_YEAST	1314300	647230000	139890000	6299400000	4946000000	8185100000	4804600	1084000000	128370000	5893400000	4992900000	10154000000	10960000	4583600000	3800400000	9440300000	11237000000	12836000000	5411600	1699800000	60465000	3565300000	4675900000	7391200000
sp|P0C0V8|RS21A_YEAST	RS21A	sp|P0C0V8|RS21A_YEAST	14947000	1932100000	230920000	12721000000	11940000000	20035000000	10214000	2701700000	211730000	13464000000	11139000000	17524000000	27986000	3708300000	783160000	7190500000	10633000000	16433000000	0	2806000000	188440000	8355700000	9588400000	19131000000
sp|Q3E757|RL11B_YEAST;sp|P0C0W9|RL11A_YEAST	RL11B	sp|Q3E757|RL11B_YEAST;sp|P0C0W9|RL11A_YEAST	65534000	917870000	5931500000	20991000000	18121000000	27174000000	61862000	600050000	5895000000	19268000000	16623000000	28538000000	57641000	1083700000	5956100000	12121000000	15792000000	21173000000	50856000	810490000	4355700000	13500000000	13961000000	25210000000
sp|Q3E7X9|RS28A_YEAST;sp|P0C0X0|RS28B_YEAST	RS28A	sp|Q3E7X9|RS28A_YEAST;sp|P0C0X0|RS28B_YEAST	10487000	0	0	8926600000	7837700000	15305000000	9900100	0	0	8954000000	9221300000	13423000000	5623500	0	78674000	4534300000	8058400000	10317000000	6134500	73606000	20580000	6217300000	7314200000	14065000000
sp|P0C155|CBPS2_YEAST	CBPS2	sp|P0C155|CBPS2_YEAST	36941000	49104000	0	29946000	35331000	47860000	41845000	57488000	0	19974000	24996000	43351000	47911000	43769000	0	0	41711000	35426000	35259000	0	0	34856000	42379000	33374000
sp|P0C2H7|RL27B_YEAST;sp|P0C2H6|RL27A_YEAST	RL27B	sp|P0C2H7|RL27B_YEAST;sp|P0C2H6|RL27A_YEAST	15663000	64333000	3474500000	16538000000	12728000000	28708000000	5609900	179060000	1947400000	14214000000	11828000000	22155000000	0	337950000	2535400000	8484100000	10375000000	17812000000	1934500	189210000	1758400000	11309000000	10425000000	17234000000
sp|P0C2H8|RL31A_YEAST	RL31A	sp|P0C2H8|RL31A_YEAST	4505200	39678000	1432700000	18027000000	12855000000	23328000000	17868000	83011000	3035400000	20695000000	15456000000	15206000000	0	48474000	2786700000	11003000000	13946000000	25391000000	10480000	124490000	2768100000	14593000000	14299000000	30184000000
sp|P0C2H9|RL31B_YEAST	RL31B	sp|P0C2H9|RL31B_YEAST	0	0	219400000	1182100000	1600300000	1439600000	0	0	300960000	1536300000	1238500000	2382600000	0	0	241900000	692830000	730200000	1087200000	0	0	205320000	1306300000	1482200000	2323200000
sp|P0CS90|HSP77_YEAST;sp|P39987|HSP7E_YEAST	HSP77	sp|P0CS90|HSP77_YEAST	5887800000	4123500000	3398500000	1548500000	1385600000	1156300000	5805100000	3350400000	2860000000	1603900000	1602700000	1878700000	2334300000	1709600000	1676300000	909830000	758990000	926630000	3405300000	1943400000	1890700000	1080100000	1257200000	1266200000
sp|P0CT04|IPB2_YEAST	IPB2	sp|P0CT04|IPB2_YEAST	76117000	106060000	70156000	0	0	0	91152000	79241000	0	0	0	0	82057000	63219000	31593000	0	0	0	75241000	104100000	0	0	0	0
sp|P0CX24|RL20B_YEAST;sp|P0CX23|RL20A_YEAST	RL20B	sp|P0CX24|RL20B_YEAST;sp|P0CX23|RL20A_YEAST	9404500	372770000	3344800000	29559000000	23820000000	43587000000	2036600	294610000	2733200000	32022000000	24687000000	33374000000	4275500	422490000	6683700000	15537000000	20210000000	33182000000	12765000	426530000	4319700000	18302000000	19493000000	39999000000
sp|P0CX26|RL43B_YEAST;sp|P0CX25|RL43A_YEAST	RL43B	sp|P0CX26|RL43B_YEAST;sp|P0CX25|RL43A_YEAST	10113000	38694000	107700000	1808200000	1786100000	3100000000	0	51298000	332280000	1897500000	1497100000	1476800000	37826000	43242000	33897000	906580000	1338400000	3055100000	0	57440000	220140000	1166300000	1756500000	3718500000
sp|P0CX28|RL44B_YEAST;sp|P0CX27|RL44A_YEAST	RL44B	sp|P0CX28|RL44B_YEAST;sp|P0CX27|RL44A_YEAST	0	0	376070000	1329300000	1018900000	1701600000	349530000	0	633010000	1109000000	1057500000	1334800000	0	0	438900000	1209400000	2078300000	1972200000	0	0	418200000	1616700000	1245600000	2175200000
sp|P0CX30|RS23B_YEAST;sp|P0CX29|RS23A_YEAST	RS23B	sp|P0CX30|RS23B_YEAST;sp|P0CX29|RS23A_YEAST	0	1283300000	650060000	8360900000	6223800000	13281000000	6696800	1855300000	493710000	9061900000	7026600000	10076000000	0	2304900000	1152900000	4431400000	6369500000	11320000000	0	1786800000	631970000	5473800000	5438400000	10799000000
sp|P0CX32|RS24B_YEAST;sp|P0CX31|RS24A_YEAST	RS24B	sp|P0CX32|RS24B_YEAST;sp|P0CX31|RS24A_YEAST	52858000	3271300000	982350000	10543000000	9714000000	17911000000	40995000	2915400000	1112200000	10292000000	10462000000	14278000000	72274000	3561400000	1383700000	5534400000	7476200000	13868000000	46460000	4254600000	1312200000	5988400000	6976300000	13845000000
sp|P0CX34|RS30B_YEAST;sp|P0CX33|RS30A_YEAST	RS30B	sp|P0CX34|RS30B_YEAST;sp|P0CX33|RS30A_YEAST	0	27694000	56996000	4455400000	4313500000	7882500000	0	98476000	81135000	4927700000	4758400000	3983100000	0	58190000	0	524430000	2807100000	4418500000	0	18525000	47248000	3031900000	2978200000	5989700000
sp|P0CX36|RS4B_YEAST;sp|P0CX35|RS4A_YEAST	RS4B	sp|P0CX36|RS4B_YEAST;sp|P0CX35|RS4A_YEAST	288380000	3717200000	2975500000	30872000000	31321000000	53772000000	271660000	5826600000	2201600000	29984000000	28521000000	53405000000	305180000	8406600000	3036400000	20029000000	30549000000	41510000000	272060000	6924300000	3229800000	22226000000	25173000000	45506000000
sp|P0CX38|RS6B_YEAST;sp|P0CX37|RS6A_YEAST	RS6B	sp|P0CX38|RS6B_YEAST;sp|P0CX37|RS6A_YEAST	35828000	4925200000	3564600000	22619000000	20952000000	33740000000	57818000	5092500000	3099200000	23614000000	20534000000	38452000000	31970000	6875600000	3680800000	14660000000	17331000000	25285000000	23524000	6758100000	2679200000	15294000000	17883000000	30281000000
sp|P0CX40|RS8B_YEAST;sp|P0CX39|RS8A_YEAST	RS8B	sp|P0CX40|RS8B_YEAST;sp|P0CX39|RS8A_YEAST	81761000	2684600000	2444400000	21352000000	17561000000	29000000000	66104000	3253900000	3145800000	24131000000	18844000000	35349000000	61445000	3517400000	2086900000	11860000000	14495000000	23761000000	58093000	4264500000	3005100000	13856000000	14102000000	28183000000
sp|P0CX42|RL23B_YEAST;sp|P0CX41|RL23A_YEAST	RL23B	sp|P0CX42|RL23B_YEAST;sp|P0CX41|RL23A_YEAST	7332500	0	173160000	5827800000	4291700000	8317300000	1657500	12992000	146930000	7609200000	5547200000	6862200000	21794000	0	175520000	3558400000	3913900000	11652000000	3155500	117520000	94477000	4692100000	2609900000	10809000000
sp|P0CX44|RL1B_YEAST;sp|P0CX43|RL1A_YEAST	RL1B	sp|P0CX44|RL1B_YEAST;sp|P0CX43|RL1A_YEAST	167600000	681930000	3386900000	15496000000	13208000000	29428000000	203860000	1335300000	4162000000	18696000000	11367000000	24833000000	70506000	913720000	2583500000	7209500000	11815000000	18390000000	28508000	950140000	2419000000	9811500000	11329000000	18457000000
sp|P0CX46|RL2B_YEAST;sp|P0CX45|RL2A_YEAST	RL2B	sp|P0CX46|RL2B_YEAST;sp|P0CX45|RL2A_YEAST	73112000	585120000	4235100000	31701000000	24050000000	46136000000	22537000	677790000	2180200000	36488000000	26542000000	41713000000	16241000	848040000	4190600000	15406000000	20537000000	32662000000	11222000	532200000	2914600000	20072000000	20400000000	36159000000
sp|P0CX48|RS11B_YEAST;sp|P0CX47|RS11A_YEAST	RS11B	sp|P0CX48|RS11B_YEAST;sp|P0CX47|RS11A_YEAST	74622000	3287000000	1458700000	16975000000	16727000000	28931000000	69348000	2825100000	1374400000	19197000000	17266000000	32529000000	109960000	3144500000	1697800000	11441000000	16146000000	25449000000	79381000	4985200000	1944700000	11734000000	12185000000	25063000000
sp|P0CX50|RL18B_YEAST;sp|P0CX49|RL18A_YEAST	RL18B	sp|P0CX50|RL18B_YEAST;sp|P0CX49|RL18A_YEAST	72915000	1000500000	8178300000	35053000000	29271000000	37681000000	37270000	1178200000	8217200000	35876000000	32086000000	52583000000	12616000	870790000	6928600000	17622000000	20201000000	31865000000	21133000	1103700000	5551700000	20400000000	22902000000	45261000000
sp|P0CX52|RS16B_YEAST;sp|P0CX51|RS16A_YEAST	RS16B	sp|P0CX52|RS16B_YEAST;sp|P0CX51|RS16A_YEAST	62453000	2488400000	1400700000	22324000000	19924000000	33965000000	31569000	3751100000	756020000	24835000000	22192000000	37614000000	32301000	5091300000	1535600000	12156000000	16945000000	29403000000	39770000	3188500000	1440100000	16465000000	16132000000	33614000000
sp|P0CX54|RL12B_YEAST;sp|P0CX53|RL12A_YEAST	RL12B	sp|P0CX54|RL12B_YEAST;sp|P0CX53|RL12A_YEAST	50166000	210970000	848780000	6703000000	5590000000	9225600000	45840000	208380000	277090000	8440900000	6222200000	9900500000	18311000	258700000	763570000	4031700000	5241700000	9281000000	4948700	179270000	519310000	3807300000	4475700000	9707000000
sp|P0CX56|RS18B_YEAST;sp|P0CX55|RS18A_YEAST	RS18B	sp|P0CX56|RS18B_YEAST;sp|P0CX55|RS18A_YEAST	201080000	6502200000	3135300000	27662000000	25330000000	37523000000	97167000	3861500000	2081700000	26137000000	24136000000	35060000000	118740000	5375600000	4204500000	13479000000	21675000000	34000000000	139360000	4838400000	2238700000	16377000000	20723000000	37205000000
sp|P0CX83|RL19B_YEAST;sp|P0CX82|RL19A_YEAST	RL19B	sp|P0CX83|RL19B_YEAST;sp|P0CX82|RL19A_YEAST	7862100	381890000	2503100000	24911000000	16095000000	29405000000	9821300	307240000	3561700000	28361000000	21963000000	28119000000	0	357870000	3967200000	13810000000	15547000000	30351000000	0	341390000	2165800000	13619000000	13382000000	30106000000
sp|P0CX85|RL35B_YEAST;sp|P0CX84|RL35A_YEAST	RL35B	sp|P0CX85|RL35B_YEAST;sp|P0CX84|RL35A_YEAST	0	0	1269800000	18617000000	13484000000	24982000000	0	0	990590000	22426000000	13862000000	15369000000	0	63536000	993400000	7030900000	13835000000	23566000000	0	5483600	1814100000	11498000000	10963000000	26902000000
sp|P10080|SSBP1_YEAST	SSBP1	sp|P10080|SSBP1_YEAST	528330000	381110000	159000000	168260000	90720000	159600000	539840000	471510000	84265000	288660000	219770000	122030000	617760000	552280000	485350000	134200000	155160000	79896000	524190000	319790000	107540000	161010000	110360000	154110000
sp|P10081|IF4A_YEAST	IF4A	sp|P10081|IF4A_YEAST	1524900000	844140000	868550000	749520000	644990000	470610000	1379300000	734570000	728860000	778050000	812490000	624830000	2266000000	1152500000	1128700000	855030000	660290000	570880000	1740700000	937620000	800880000	778080000	703770000	580890000
sp|P10174|COX7_YEAST	COX7	sp|P10174|COX7_YEAST	0	0	0	74633000	134860000	272180000	0	0	0	0	0	0	0	0	0	216500000	438600000	248840000	0	0	0	154410000	527680000	158860000
sp|P10363|PRI1_YEAST	PRI1	sp|P10363|PRI1_YEAST	19626000	0	0	0	0	0	0	0	0	0	0	0	0	0	0	0	0	0	0	0	0	0	0	0
sp|P10507|MPPB_YEAST	MPPB	sp|P10507|MPPB_YEAST	239780000	12992000	51963000	30427000	51294000	51443000	239540000	0	0	30566000	44138000	0	49737000	0	0	21251000	16122000	0	65128000	0	32020000	48343000	0	19928000
sp|P10591|HSP71_YEAST	HSP71	sp|P10591|HSP71_YEAST	8972300000	6146500000	4320000000	2666300000	2859900000	2163800000	9457400000	6177900000	4370400000	2776400000	3093100000	3602000000	7618100000	6193300000	4828100000	2872000000	2203400000	2224000000	10058000000	5499300000	3695000000	2571800000	2473300000	2162000000
sp|P10592|HSP72_YEAST	HSP72	sp|P10592|HSP72_YEAST	1168000000	659700000	492400000	267150000	253110000	179220000	914230000	622290000	462820000	259110000	265210000	362450000	1256600000	716200000	530350000	300440000	193950000	187630000	1775200000	656380000	482820000	274990000	274540000	235310000
sp|P10614|CP51_YEAST	CP51	sp|P10614|CP51_YEAST	57007000	29102000	34527000	28164000	35574000	40006000	48506000	33042000	0	47228000	51014000	35818000	34410000	0	0	30946000	20955000	19534000	34793000	0	0	7035600	19562000	15655000
sp|P10622|RLA3_YEAST	RLA3	sp|P10622|RLA3_YEAST	0	0	0	0	646470000	612480000	0	0	0	466070000	639620000	358760000	0	0	0	301620000	307520000	346260000	0	0	0	436790000	567180000	1063400000
sp|P10659|METK1_YEAST	METK1	sp|P10659|METK1_YEAST	393410000	59521000	31069000	18780000	62591000	0	409690000	53768000	27259000	15357000	0	53614000	503030000	102060000	36839000	10318000	20323000	15641000	375900000	38170000	0	20098000	17150000	21036000
sp|P10662|RT01_YEAST	RT01	sp|P10662|RT01_YEAST	65325000	1016200000	301880000	507510000	875350000	150990000	75521000	788080000	268120000	571280000	1161000000	241890000	7723000	861600000	238700000	446480000	527920000	307000000	0	714190000	140130000	379410000	698340000	365460000
sp|P10663|RT02_YEAST	RT02	sp|P10663|RT02_YEAST	0	184660000	0	133850000	240190000	0	0	191740000	0	148990000	420440000	100610000	0	233940000	61030000	107680000	182350000	108950000	0	247440000	35694000	116330000	274980000	157530000
sp|P10664|RL4A_YEAST;sp|P49626|RL4B_YEAST	RL4A	sp|P10664|RL4A_YEAST;sp|P49626|RL4B_YEAST	98269000	73623000	3968300000	48110000000	37513000000	65944000000	64956000	187450000	1796100000	56406000000	36700000000	52662000000	121230000	1067000000	3237100000	26966000000	33883000000	57620000000	55194000	354390000	3924800000	31810000000	29053000000	62659000000
sp|P10823|GPA2_YEAST	GPA2	sp|P10823|GPA2_YEAST	22734000	7521300	0	0	0	9397300	16549000	9606600	0	10257000	0	0	29174000	10173000	0	0	11767000	0	27546000	9262500	0	0	0	0
sp|P10834|PET54_YEAST	PET54	sp|P10834|PET54_YEAST	0	0	0	0	0	0	0	0	0	0	0	0	0	0	0	0	0	0	0	0	0	7016500	0	0
sp|P10869|AK_YEAST	AK	sp|P10869|AK_YEAST	57838000	19894000	0	0	0	0	54729000	19126000	0	0	0	0	51302000	17648000	0	0	0	0	52596000	0	0	0	0	0
sp|P10962|MAK16_YEAST	MAK16	sp|P10962|MAK16_YEAST	0	0	135900000	244210000	56331000	0	0	0	0	193070000	66953000	46067000	0	0	257950000	135080000	46027000	0	0	0	0	216870000	62820000	60750000
sp|P10963|PCKA_YEAST	PCKA	sp|P10963|PCKA_YEAST	21724000000	10181000000	7430200000	5545300000	4769500000	3967600000	12891000000	9318500000	6082000000	4873600000	4866800000	4672600000	10033000000	7819300000	6562300000	4801900000	3383300000	3080800000	9693800000	6382500000	5277300000	4944800000	3710400000	2937200000
sp|P10964|RPA1_YEAST	RPA1	sp|P10964|RPA1_YEAST	41329000	0	0	13983000	0	0	39010000	22628000	0	14528000	10798000	0	22457000	12238000	0	0	0	0	11905000	0	0	0	0	0
sp|P11075|SEC7_YEAST	SEC7	sp|P11075|SEC7_YEAST	65731000	0	0	0	0	13057000	95666000	13552000	0	0	0	0	71375000	18427000	0	0	0	0	80592000	14575000	0	40949000	0	0
sp|P11076|ARF1_YEAST	ARF1	sp|P11076|ARF1_YEAST	573400000	206700000	124200000	131860000	128050000	128280000	588030000	156080000	119690000	141310000	176260000	166980000	522840000	192390000	163310000	148440000	140750000	136550000	536500000	163320000	135950000	142920000	136460000	129260000
sp|P11154|PYC1_YEAST	PYC1	sp|P11154|PYC1_YEAST	1997700000	561570000	470160000	597470000	482550000	414400000	2105100000	771020000	252220000	578280000	558570000	473870000	2163400000	670080000	387880000	636570000	452120000	389990000	1995400000	569290000	504530000	623920000	487220000	457410000
sp|P11325|SYLM_YEAST	SYLM	sp|P11325|SYLM_YEAST	112830000	29350000	0	0	0	0	145500000	26670000	0	15237000	0	0	49653000	0	0	0	0	0	42736000	25498000	0	0	0	0
sp|P11353|HEM6_YEAST	HEM6	sp|P11353|HEM6_YEAST	59870000	61777000	30141000	16784000	25743000	160270000	50193000	61699000	0	0	0	0	88839000	68702000	24699000	15278000	16907000	0	63295000	46806000	0	18476000	16799000	0
sp|P11412|G6PD_YEAST	G6PD	sp|P11412|G6PD_YEAST	805380000	24507000	19104000	5000700	5748500	3906200	577110000	22983000	0	19428000	8460800	9219800	263080000	6524600	6138000	4907000	0	0	574010000	6426700	0	0	3335800	0
sp|P11484|HSP75_YEAST	HSP75	sp|P11484|HSP75_YEAST	610230000	0	310430000	481110000	643790000	928880000	593310000	106360000	0	660950000	902220000	1481700000	862380000	93798000	152290000	453160000	536180000	987230000	756850000	100290000	278520000	356410000	557670000	1100300000
sp|P11491|PPB_YEAST	PPB	sp|P11491|PPB_YEAST	25424000	0	57809000	77684000	85267000	118090000	0	69859000	0	58097000	104490000	167910000	0	93280000	0	133480000	287800000	301550000	0	128710000	74984000	130300000	294840000	231270000
sp|P11632|NHP6A_YEAST	NHP6A	sp|P11632|NHP6A_YEAST	0	0	0	0	0	0	0	0	0	2880600	0	0	0	0	0	0	0	0	0	0	0	0	0	0
sp|P11633|NHP6B_YEAST	NHP6B	sp|P11633|NHP6B_YEAST	0	0	0	0	0	0	0	0	0	0	0	0	31031000	0	0	0	0	0	0	0	0	0	0	0
sp|P11745|RNA1_YEAST	RNA1	sp|P11745|RNA1_YEAST	73280000	46917000	0	0	0	0	73613000	24846000	0	0	0	0	66890000	25877000	0	0	0	0	74335000	0	0	0	0	0
sp|P11792|SCH9_YEAST	SCH9	sp|P11792|SCH9_YEAST	0	0	0	0	0	0	0	0	0	0	0	0	0	0	0	0	0	0	5875500	0	0	0	0	0
sp|P11914|MPPA_YEAST	MPPA	sp|P11914|MPPA_YEAST	144540000	122870000	36153000	26782000	24352000	16062000	184950000	118730000	31772000	27406000	37352000	0	29158000	40071000	21003000	16450000	0	0	53572000	25587000	0	17845000	0	57679000
sp|P11938|RAP1_YEAST	RAP1	sp|P11938|RAP1_YEAST	0	0	0	0	0	0	0	0	0	0	0	0	0	0	0	0	0	0	4159200	0	0	0	0	0
sp|P11986|INO1_YEAST	INO1	sp|P11986|INO1_YEAST	577220000	236750000	152250000	151480000	128740000	104380000	583330000	386320000	344950000	182620000	168300000	205310000	595630000	275870000	203570000	161950000	97923000	101340000	548660000	217700000	217890000	136530000	112330000	111140000
sp|P12385|ERF1_YEAST	ERF1	sp|P12385|ERF1_YEAST	123010000	80796000	70762000	164490000	305830000	287970000	110580000	57106000	0	129540000	352580000	327000000	271010000	99627000	117340000	172130000	172880000	173080000	186130000	91197000	91671000	131790000	214360000	196080000
sp|P12611|WHI2_YEAST	WHI2	sp|P12611|WHI2_YEAST	0	0	0	0	0	0	0	0	0	0	0	0	0	0	0	0	0	0	0	0	0	4216600	0	0
sp|P12612|TCPA_YEAST	TCPA	sp|P12612|TCPA_YEAST	73362000	136640000	41405000	27659000	20510000	0	67512000	284390000	38054000	0	26240000	28441000	0	90711000	56499000	35500000	29867000	27315000	56981000	61059000	75213000	26613000	25556000	0
sp|P12683|HMDH1_YEAST	HMDH1	sp|P12683|HMDH1_YEAST	86851000	603640000	451580000	312580000	315470000	255540000	86773000	561410000	374790000	251650000	288040000	256450000	124640000	461240000	344830000	262490000	246730000	216000000	92300000	653740000	422810000	280840000	269450000	200780000
sp|P12684|HMDH2_YEAST	HMDH2	sp|P12684|HMDH2_YEAST	66446000	245160000	243310000	225850000	249490000	234180000	25512000	206050000	155410000	154660000	228240000	242910000	78678000	149160000	170120000	103220000	138810000	119630000	72434000	165610000	134430000	85859000	101030000	79166000
sp|P12686|RT13_YEAST	RT13	sp|P12686|RT13_YEAST	92958000	592850000	233150000	394850000	734830000	120480000	84432000	739930000	133130000	424980000	899960000	171840000	28391000	535250000	127170000	339560000	558120000	195580000	43379000	563910000	108270000	276490000	671910000	338050000
sp|P12687|RM02_YEAST	RM02	sp|P12687|RM02_YEAST	0	226890000	9527500000	1261200000	1052800000	251240000	0	169050000	8247100000	1316600000	1306900000	440590000	7463900	289780000	4839700000	702350000	884570000	350960000	0	267590000	2513200000	609780000	1047000000	630910000
sp|P12688|YPK1_YEAST	YPK1	sp|P12688|YPK1_YEAST	135510000	32971000	22389000	18788000	13512000	19653000	130570000	19929000	0	9862200	9507700	12962000	135460000	23521000	27452000	12779000	7797000	10474000	136510000	14939000	0	8654100	0	0
sp|P12695|ODP2_YEAST	ODP2	sp|P12695|ODP2_YEAST	31622000	731530000	38597000000	14697000000	1456500000	265110000	47225000	506260000	16645000000	22385000000	2747400000	425510000	35875000	422260000	27246000000	7637600000	893800000	81278000	20170000	527110000	27318000000	8525000000	818570000	173430000
sp|P12709|G6PI_YEAST	G6PI	sp|P12709|G6PI_YEAST	883210000	543100000	184240000	153320000	80960000	90323000	820660000	686110000	110340000	233870000	128890000	116340000	1170600000	948040000	1082300000	261230000	148140000	151440000	867570000	870640000	177790000	274050000	173240000	137800000
sp|P12753|RAD50_YEAST	RAD50	sp|P12753|RAD50_YEAST	10741000	0	0	0	0	0	11855000	0	0	0	0	0	9248000	7799700	0	0	0	0	0	0	0	0	0	0
sp|P12754|EI2BD_YEAST	EI2BD	sp|P12754|EI2BD_YEAST	13526000	0	0	0	0	0	12987000	0	0	0	0	0	17588000	0	0	7034600	0	0	26451000	0	0	0	0	0
sp|P12904|AAKG_YEAST	AAKG	sp|P12904|AAKG_YEAST	24334000	0	0	0	0	0	22816000	0	0	0	0	0	0	0	0	0	0	0	18632000	0	0	0	0	0
sp|P12945|NAT1_YEAST	NAT1	sp|P12945|NAT1_YEAST	35454000	0	0	0	0	0	43618000	0	0	16381000	0	0	35175000	0	0	0	0	13951000	39548000	0	0	0	0	0
sp|P13186|KIN2_YEAST	KIN2	sp|P13186|KIN2_YEAST	0	0	0	0	0	0	0	0	0	0	0	0	21903000	0	0	0	0	0	0	0	0	0	0	0
sp|P13188|SYQ_YEAST	SYQ	sp|P13188|SYQ_YEAST	470750000	47093000	21575000	10266000	0	0	375460000	53734000	0	12211000	0	0	224080000	48944000	37425000	0	0	0	300770000	15485000	0	15677000	11487000	0
sp|P13259|PCY1_YEAST	PCY1	sp|P13259|PCY1_YEAST	0	0	0	0	0	0	0	0	0	0	0	0	33362000	0	0	0	0	0	0	0	0	0	0	0
sp|P13298|PYRE_YEAST	PYRE	sp|P13298|PYRE_YEAST	8050600	0	0	0	0	0	11079000	0	0	0	0	0	22841000	0	0	0	0	0	6403200	0	0	0	0	0
sp|P13393|TBP_YEAST	TBP	sp|P13393|TBP_YEAST	0	0	0	0	0	0	0	0	0	0	0	0	0	0	0	0	0	0	0	43795000	0	0	0	0
sp|P13517|CAPZB_YEAST	CAPZB	sp|P13517|CAPZB_YEAST	58850000	10262000	0	0	0	0	60953000	11957000	0	0	0	0	83477000	9778300	0	0	0	0	64057000	0	0	0	0	0
sp|P13586|ATC1_YEAST	ATC1	sp|P13586|ATC1_YEAST	29905000	84395000	52737000	100740000	216770000	573510000	0	53749000	0	68515000	152060000	413760000	0	61649000	39237000	112700000	705340000	603220000	6026900	55606000	37716000	134360000	447500000	336150000
sp|P13663|DHAS_YEAST	DHAS	sp|P13663|DHAS_YEAST	516080000	239870000	55521000	117160000	76124000	51561000	530640000	201290000	104130000	101430000	96740000	122490000	481080000	173690000	169970000	108660000	73993000	17312000	536410000	64077000	127930000	115360000	62105000	59231000
sp|P13711|ACOX_YEAST	ACOX	sp|P13711|ACOX_YEAST	193510000	1838700000	1670600000	494630000	288590000	89834000	206460000	1143400000	2078200000	988350000	489740000	182920000	185650000	2021600000	1514600000	370900000	89130000	40357000	218160000	1652100000	768970000	388890000	209370000	55698000
sp|P14020|DPM1_YEAST	DPM1	sp|P14020|DPM1_YEAST	447230000	238270000	141530000	288770000	278930000	223410000	464290000	235960000	111850000	246630000	344990000	281050000	331810000	255120000	194150000	582070000	496650000	536350000	283490000	199540000	348270000	599250000	442950000	458070000
sp|P14063|RM31_YEAST	RM31	sp|P14063|RM31_YEAST	0	50308000	2765900000	455250000	274370000	119960000	0	0	3285900000	558010000	417980000	213050000	0	34147000	1269700000	306630000	187680000	96118000	0	16120000	876550000	149730000	203940000	130590000
sp|P14065|GCY1_YEAST	GCY1	sp|P14065|GCY1_YEAST	53476000	0	0	0	0	0	54240000	0	0	0	0	0	46318000	0	0	0	0	0	27142000	0	0	0	0	0
sp|P14120|RL30_YEAST	RL30	sp|P14120|RL30_YEAST	227510000	130480000	688950000	11035000000	8938700000	14867000000	51778000	64247000	661010000	11160000000	9133600000	6194700000	85124000	0	600810000	5092100000	6583600000	11027000000	58316000	317400000	1509500000	6053600000	6583600000	14281000000
sp|P14126|RL3_YEAST	RL3	sp|P14126|RL3_YEAST	284900000	1516800000	5297000000	42380000000	34741000000	60025000000	247150000	1372700000	6320600000	47049000000	36325000000	54943000000	183220000	1107000000	6276900000	21918000000	29804000000	50112000000	147540000	1316300000	6133000000	28507000000	27681000000	57842000000
sp|P14164|ABF1_YEAST	ABF1	sp|P14164|ABF1_YEAST	0	0	0	0	0	0	20410000	0	0	0	0	0	37431000	0	0	0	0	0	22888000	0	0	0	0	0
sp|P14291|RED1_YEAST	RED1	sp|P14291|RED1_YEAST	22971000	0	0	0	0	0	19636000	0	0	0	0	0	15961000	0	0	0	0	0	13637000	0	0	0	0	0
sp|P14306|CPYI_YEAST	CPYI	sp|P14306|CPYI_YEAST	47000000	0	0	0	0	0	43674000	0	0	0	0	0	37434000	0	0	0	0	0	0	0	0	0	0	0
sp|P14359|SNA3_YEAST	SNA3	sp|P14359|SNA3_YEAST	0	0	0	28328000	68427000	81242000	0	0	0	22851000	35698000	104340000	0	0	0	0	97108000	48502000	0	0	0	39078000	95082000	92023000
sp|P14540|ALF_YEAST	ALF	sp|P14540|ALF_YEAST	10681000000	4977900000	1806000000	2199700000	2299500000	1713900000	11440000000	4860000000	2746000000	2045400000	2028200000	1903400000	6910900000	5214700000	3969200000	2500500000	1940500000	1780600000	7182400000	4150100000	3030700000	2312500000	2088800000	1810800000
sp|P14681|KSS1_YEAST	KSS1	sp|P14681|KSS1_YEAST	0	0	0	0	0	0	0	0	0	0	0	0	0	10529000	0	0	0	0	0	0	0	0	0	0
sp|P14693|SAM35_YEAST	SAM35	sp|P14693|SAM35_YEAST	0	0	0	0	0	0	0	0	0	0	0	0	0	0	0	0	0	0	0	0	0	0	0	8901400
sp|P14742|GFA1_YEAST	GFA1	sp|P14742|GFA1_YEAST	533570000	637030000	504730000	383640000	410500000	315600000	476680000	637700000	340020000	373800000	416000000	350700000	877840000	1349900000	1176200000	872970000	702280000	586290000	605000000	1406500000	1165400000	830870000	681410000	518150000
sp|P14743|NMT_YEAST	NMT	sp|P14743|NMT_YEAST	0	0	0	0	0	0	0	0	0	0	0	0	0	0	0	0	0	0	10207000	0	0	0	0	0
sp|P14747|PP2B2_YEAST	PP2B2	sp|P14747|PP2B2_YEAST	7845800	0	0	0	0	0	9288200	0	0	0	0	0	0	0	0	0	0	0	0	0	0	0	0	0
sp|P14772|BPT1_YEAST	BPT1	sp|P14772|BPT1_YEAST	12271000	69291000	38461000	28147000	37867000	45414000	0	62194000	53512000	29270000	36322000	0	44072000	66092000	61849000	36196000	43157000	34777000	42286000	66500000	44206000	34852000	41711000	0
sp|P14832|CYPH_YEAST	CYPH	sp|P14832|CYPH_YEAST	104610000	24134000	0	25649000	34513000	56224000	69919000	21787000	0	24263000	42171000	0	116230000	25622000	0	33120000	54431000	51197000	71605000	29781000	0	29523000	30879000	48346000
sp|P14843|AROF_YEAST	AROF	sp|P14843|AROF_YEAST	128900000	12699000	10409000	10367000	0	0	146710000	11460000	0	0	0	0	84978000	0	0	0	0	0	87199000	7407300	0	0	0	0
sp|P14904|AMPL_YEAST	AMPL	sp|P14904|AMPL_YEAST	27437000	567560000	179080000	34373000	0	0	0	831280000	167310000	66405000	48931000	0	273440000	991940000	353370000	108630000	15792000	0	176190000	679440000	157540000	49042000	18506000	0
sp|P14906|SEC63_YEAST	SEC63	sp|P14906|SEC63_YEAST	71401000	633260000	547550000	557660000	914450000	1090700000	47910000	450260000	319770000	378750000	710040000	1191800000	133450000	387180000	372660000	545590000	1384000000	1468600000	120850000	452940000	436740000	604010000	1155900000	986630000
sp|P14907|NSP1_YEAST	NSP1	sp|P14907|NSP1_YEAST	104000000	0	0	0	0	0	95298000	0	0	0	0	0	119710000	0	0	0	0	0	115490000	0	0	0	0	0
sp|P14908|MTF1_YEAST	MTF1	sp|P14908|MTF1_YEAST	23520000	0	0	0	0	0	0	0	0	0	0	0	0	0	0	0	0	0	0	0	0	0	0	0
sp|P14922|CYC8_YEAST	CYC8	sp|P14922|CYC8_YEAST	40070000	0	0	0	0	0	35668000	0	0	0	0	0	29552000	18496000	0	0	0	0	37387000	0	0	0	0	0
sp|P15019|TAL1_YEAST	TAL1	sp|P15019|TAL1_YEAST	1935200000	474520000	227910000	46166000	28794000	14396000	2329200000	337360000	103720000	61214000	37014000	39994000	2251600000	306960000	103180000	38971000	18589000	0	1962400000	301350000	73839000	50034000	17971000	0
sp|P15108|HSC82_YEAST	HSC82	sp|P15108|HSC82_YEAST	10637000000	3464700000	1984700000	1318800000	1387100000	1117900000	11015000000	3143300000	2184900000	1306300000	1309700000	2041900000	14266000000	3604800000	3250300000	1681500000	1151800000	1224500000	13064000000	3096500000	2494200000	1527400000	1303700000	1197000000
sp|P15179|SYDM_YEAST	SYDM	sp|P15179|SYDM_YEAST	62094000	19837000	0	0	0	0	49506000	25104000	0	0	0	0	31296000	0	0	0	0	0	31974000	0	0	0	0	0
sp|P15180|SYKC_YEAST	SYKC	sp|P15180|SYKC_YEAST	224000000	21863000	0	6852100	6842200	0	307490000	36830000	0	8553300	10321000	5615500	475000000	41686000	10621000	13836000	0	8913200	661990000	21907000	0	17888000	6907200	0
sp|P15202|CATA_YEAST	CATA	sp|P15202|CATA_YEAST	405830000	36453000	0	52708000	0	40701000	379780000	61965000	0	0	24642000	0	163600000	23081000	0	43413000	23462000	45929000	175430000	45227000	0	31552000	57602000	22755000
sp|P15274|AMPD_YEAST	AMPD	sp|P15274|AMPD_YEAST	55321000	15924000	21354000	0	0	0	60433000	11568000	0	0	0	0	39055000	0	0	20439000	10442000	0	70908000	13850000	0	0	17393000	0
sp|P15303|SEC23_YEAST	SEC23	sp|P15303|SEC23_YEAST	292060000	111740000	90424000	87166000	64271000	54693000	254660000	129810000	74961000	107020000	74769000	44255000	415100000	139210000	85110000	86688000	66630000	37925000	353600000	125030000	91019000	90706000	60191000	0
sp|P15367|SEC11_YEAST	SEC11	sp|P15367|SEC11_YEAST	0	0	0	20987000	16757000	0	0	0	0	0	21528000	21792000	0	0	0	16329000	21193000	22344000	0	0	0	17694000	0	0
sp|P15424|MS116_YEAST	MS116	sp|P15424|MS116_YEAST	43674000	3732500000	5614000000	3600100000	1600800000	252810000	22352000	3018500000	4635400000	3530900000	4044500000	635730000	5478000	1686900000	2579200000	2075300000	824450000	137840000	32811000	1591700000	2057500000	1840800000	926740000	179650000
sp|P15454|KGUA_YEAST	KGUA	sp|P15454|KGUA_YEAST	355630000	53807000	0	0	0	0	420850000	67898000	0	0	0	0	407960000	55526000	33345000	0	0	0	317700000	35348000	0	0	0	0
sp|P15496|IDI1_YEAST	IDI1	sp|P15496|IDI1_YEAST	0	0	0	0	0	0	0	0	0	0	0	0	0	0	0	0	0	0	0	7312800	0	0	0	0
sp|P15565-2|TRM1_YEAST;sp|P15565|TRM1_YEAST	TRM1	sp|P15565-2|TRM1_YEAST;sp|P15565|TRM1_YEAST	15275000	0	0	17469000	0	15450000	15698000	0	0	19711000	18756000	0	0	0	0	17133000	0	0	12218000	0	0	17378000	15383000	0
sp|P15624|SYFB_YEAST	SYFB	sp|P15624|SYFB_YEAST	237900000	12997000	24565000	33369000	29380000	8783800	145690000	47682000	0	29059000	24502000	0	206380000	45216000	26806000	37475000	17418000	33008000	258990000	34836000	19875000	53151000	40912000	22924000
sp|P15625|SYFA_YEAST	SYFA	sp|P15625|SYFA_YEAST	149410000	13889000	0	2520900	0	0	212720000	15487000	0	11392000	6821900	3341000	521810000	27802000	0	11561000	0	0	544490000	7975000	0	8033700	0	0
sp|P15646|FBRL_YEAST	FBRL	sp|P15646|FBRL_YEAST	161240000	941560000	1233600000	1007800000	785120000	427680000	181350000	1206300000	733840000	1136300000	826740000	609170000	230780000	1040000000	1463000000	1219300000	514360000	266370000	229060000	943930000	716040000	1001700000	593570000	431620000
sp|P15700|KCY_YEAST	KCY	sp|P15700|KCY_YEAST	57627000	0	0	0	0	0	71884000	0	0	0	0	0	80450000	0	0	0	0	0	83666000	0	0	0	0	0
sp|P15703|BGL2_YEAST	BGL2	sp|P15703|BGL2_YEAST	68689000	63626000	96195000	72298000	160220000	145340000	50923000	0	66856000	40873000	83971000	98604000	40717000	73645000	0	71330000	121220000	63663000	56832000	72423000	0	61690000	105610000	88595000
sp|P15705|STI1_YEAST	STI1	sp|P15705|STI1_YEAST	252790000	108840000	67506000	0	0	0	444200000	68961000	30641000	0	0	0	455640000	72144000	17056000	0	0	0	230160000	31837000	0	0	0	0
sp|P15732|UBC5_YEAST;sp|P15731|UBC4_YEAST	UBC5	sp|P15732|UBC5_YEAST	63971000	0	0	0	0	0	54285000	0	0	0	0	0	72970000	0	0	31496000	0	0	52800000	0	0	0	0	0
sp|P15790|CSK21_YEAST	CSK21	sp|P15790|CSK21_YEAST	0	92775000	0	0	0	0	0	0	0	0	0	0	0	0	0	0	0	0	38497000	0	0	0	0	0
sp|P15873|PCNA_YEAST	PCNA	sp|P15873|PCNA_YEAST	147990000	20151000	0	18609000	20602000	13711000	117860000	16946000	0	15757000	14360000	0	123300000	18779000	16396000	15429000	19936000	0	167650000	26463000	0	14451000	20276000	0
sp|P15891|ABP1_YEAST	ABP1	sp|P15891|ABP1_YEAST	238970000	75255000	59315000	0	0	0	98683000	56120000	0	0	0	0	210900000	60235000	50729000	11385000	0	0	102850000	84131000	0	0	0	0
sp|P15992|HSP26_YEAST	HSP26	sp|P15992|HSP26_YEAST	49203000	57472000	20881000	0	0	0	51509000	200220000	0	0	12390000	0	173300000	299500000	25904000	15595000	0	0	139540000	178840000	20246000	15299000	0	0
sp|P16120|THRC_YEAST	THRC	sp|P16120|THRC_YEAST	301940000	0	22681000	0	0	0	146320000	27519000	0	5218400	20315000	0	99761000	23315000	47604000	30715000	0	0	228990000	23503000	0	0	15018000	0
sp|P16140|VATB_YEAST	VATB	sp|P16140|VATB_YEAST	946120000	1172300000	1013700000	611520000	1076500000	2893900000	1054200000	874080000	693250000	495140000	798690000	1257300000	1005000000	1806700000	1474700000	987790000	1614000000	2321000000	1037500000	1949300000	1653700000	1200500000	1853600000	2289800000
sp|P16370|RPB3_YEAST	RPB3	sp|P16370|RPB3_YEAST	15159000	0	0	0	0	0	11157000	0	0	0	0	0	0	0	0	7036300	0	0	9676900	0	0	5706200	0	0
sp|P16387|ODPA_YEAST	ODPA	sp|P16387|ODPA_YEAST	538370000	2904700000	13313000000	3629700000	601700000	247010000	572200000	3138000000	11896000000	5336700000	886050000	418080000	650210000	2729400000	18591000000	2513800000	497170000	317890000	574850000	2551300000	12414000000	2558400000	451880000	254800000
sp|P16451|ODPX_YEAST	ODPX	sp|P16451|ODPX_YEAST	2319000	3081800	3863900000	3018300000	23137000	4402200	1888300	3170500	836270000	4501000000	135930000	6127500	0	3373700	2836100000	1743400000	20440000	1109400	1701800	0	978960000	2019200000	18760000	0
sp|P16467|PDC5_YEAST	PDC5	sp|P16467|PDC5_YEAST	0	0	0	0	0	0	33729000	0	0	0	0	0	0	0	0	0	0	0	0	0	0	0	0	0
sp|P16474|GRP78_YEAST	GRP78	sp|P16474|GRP78_YEAST	1473300000	898130000	659420000	403030000	461210000	347090000	1321100000	805860000	450720000	383220000	428800000	539030000	1530800000	813250000	919290000	468680000	408670000	473610000	1265500000	993440000	853850000	509930000	575430000	542460000
sp|P16521|EF3A_YEAST	EF3A	sp|P16521|EF3A_YEAST	1893600000	1310100000	1160800000	2082100000	1393100000	1294000000	1748900000	1289100000	1039200000	2084400000	1463100000	1795000000	2477800000	2526100000	2561900000	2004000000	1374100000	1396300000	2510700000	2557000000	2030300000	2145500000	1605100000	1661900000
sp|P16547|OM45_YEAST	OM45	sp|P16547|OM45_YEAST	120870000	188540000	315830000	60793000	69444000	49601000	298120000	110030000	73583000	84606000	88026000	125650000	78593000	49999000	60929000	39791000	45536000	0	109170000	82258000	31244000	51468000	53593000	74069000
sp|P16550|APA1_YEAST	APA1	sp|P16550|APA1_YEAST	54583000	0	0	0	0	0	74925000	0	0	4631800	5178900	0	86144000	3806700	0	5698500	0	0	85022000	0	0	4182200	0	0
sp|P16603|NCPR_YEAST	NCPR	sp|P16603|NCPR_YEAST	195780000	208080000	165240000	179740000	224150000	213190000	179030000	184500000	94554000	201040000	229650000	315680000	362710000	189200000	206020000	248930000	299670000	402510000	293110000	166340000	123930000	213100000	254900000	263070000
sp|P16622|HEMH_YEAST	HEMH	sp|P16622|HEMH_YEAST	118710000	49486000	38391000	28803000	0	43366000	128350000	60356000	70620000	33850000	0	0	91010000	0	0	48131000	0	0	81170000	44637000	64563000	48141000	39090000	41244000
sp|P16861|PFKA1_YEAST	PFKA1	sp|P16861|PFKA1_YEAST	1126600000	2128200000	585590000	529790000	419400000	285750000	1172100000	2843200000	725650000	508280000	555200000	385190000	1894300000	2750000000	1310800000	909820000	657480000	558790000	1891300000	2888300000	1185800000	894120000	780490000	704590000
sp|P16862|PFKA2_YEAST	PFKA2	sp|P16862|PFKA2_YEAST	834710000	2216600000	821310000	441780000	447960000	294700000	675990000	2576800000	883210000	429940000	475130000	459960000	1412400000	3573800000	1821400000	782940000	611780000	488200000	1237400000	2903200000	1175700000	778790000	735360000	528930000
sp|P17076|RL8A_YEAST	RL8A	sp|P17076|RL8A_YEAST	57124000	1360300000	8027700000	46183000000	33898000000	57453000000	41795000	1261300000	7264800000	45432000000	36003000000	52691000000	54512000	1776600000	11126000000	22339000000	30228000000	45335000000	50697000	1259700000	5530600000	25420000000	26340000000	50845000000
sp|P17157|PHO85_YEAST	PHO85	sp|P17157|PHO85_YEAST	0	0	0	0	0	0	0	0	0	0	0	0	0	0	0	0	0	0	23328000	0	0	0	0	0
sp|P17255|VATA_YEAST	VATA	sp|P17255|VATA_YEAST	1486500000	1463800000	758460000	653070000	1118300000	3226700000	1412800000	1130800000	649970000	521870000	817160000	1645900000	1541500000	2428600000	1699900000	999220000	1753400000	2506900000	1545000000	2312000000	1829800000	1254000000	2018200000	2402700000
sp|P17423|KHSE_YEAST	KHSE	sp|P17423|KHSE_YEAST	195060000	24792000	16054000	12011000	12850000	14496000	183990000	32858000	0	9002700	16926000	16967000	236780000	17202000	0	16022000	0	10464000	207870000	37052000	28896000	15686000	21698000	17020000
sp|P17442|PHO81_YEAST	PHO81	sp|P17442|PHO81_YEAST	0	0	0	0	0	0	0	0	0	0	0	0	0	0	0	0	0	0	4842600	0	0	0	0	0
sp|P17505|MDHM_YEAST	MDHM	sp|P17505|MDHM_YEAST	5795400000	384420000	859410000	545950000	325870000	354730000	6650400000	334810000	322220000	566390000	453070000	608450000	5909600000	545380000	369900000	435960000	223480000	249260000	5684500000	335940000	421190000	554810000	273900000	271520000
sp|P17536|TPM1_YEAST	TPM1	sp|P17536|TPM1_YEAST	36699000	99015000	139190000	0	0	0	31712000	72492000	0	0	0	0	58621000	68402000	80704000	0	0	0	22246000	116630000	34355000	0	0	0
sp|P17555|CAP_YEAST	CAP	sp|P17555|CAP_YEAST	147880000	11542000	0	16449000	0	0	99747000	17382000	0	0	14204000	0	57395000	31367000	0	13272000	0	0	162300000	0	0	21125000	0	0
sp|P17558|RTPT_YEAST	RTPT	sp|P17558|RTPT_YEAST	0	1188900000	239110000	572660000	930540000	156170000	97424000	1357500000	288460000	485230000	1055000000	207880000	0	959020000	356020000	458970000	765270000	391450000	487100000	831640000	200020000	346390000	899620000	373360000
sp|P17629|HPR1_YEAST	HPR1	sp|P17629|HPR1_YEAST	0	0	0	0	0	0	0	0	0	0	0	0	0	0	0	0	0	0	4691900	0	0	0	0	0
sp|P17649|GABAT_YEAST	GABAT	sp|P17649|GABAT_YEAST	447090000	9736700	0	0	13561000	0	486760000	27820000	0	15306000	0	0	210790000	36374000	23856000	13825000	0	0	303020000	18450000	0	0	16184000	0
sp|P17695|GLRX2_YEAST	GLRX2	sp|P17695|GLRX2_YEAST	306360000	41791000	12810000	115240000	486210000	787150000	452100000	84895000	57433000	87352000	347110000	764960000	229180000	35041000	0	330780000	975200000	1123700000	180920000	65484000	216430000	407070000	1083200000	1055500000
sp|P17709|HXKG_YEAST	HXKG	sp|P17709|HXKG_YEAST	1081900000	57725000	81239000	191330000	134320000	174480000	1382200000	172550000	40541000	185420000	238860000	174880000	1568800000	212520000	83603000	281140000	205110000	208870000	1350800000	107250000	159780000	280230000	155320000	142470000
sp|P17883|SKI3_YEAST	SKI3	sp|P17883|SKI3_YEAST	27237000	71563000	43661000	34132000	0	0	0	119910000	0	24079000	0	0	0	108350000	41520000	22632000	0	0	32245000	70777000	0	19511000	0	0
sp|P17891|CLC1_YEAST	CLC1	sp|P17891|CLC1_YEAST	0	0	0	0	0	0	0	0	0	0	0	0	0	0	0	0	0	0	0	8506900	0	0	0	0
sp|P17967|PDI_YEAST	PDI	sp|P17967|PDI_YEAST	2151900000	549030000	152310000	129070000	64216000	112890000	1924700000	436160000	96402000	126540000	116200000	123560000	1682900000	436190000	286040000	165400000	50413000	24631000	1691000000	344880000	171470000	132960000	58131000	46283000
sp|P18239|ADT2_YEAST;sp|P18238|ADT3_YEAST	ADT2	sp|P18239|ADT2_YEAST	6495000000	3748800000	5672400000	9525900000	16155000000	24528000000	6075300000	4206300000	4821700000	7476600000	15588000000	34727000000	7084900000	3431000000	3948100000	5042700000	8205800000	8935800000	7818100000	2801500000	4259000000	5349700000	8519000000	8912800000
sp|P18409|MDM10_YEAST	MDM10	sp|P18409|MDM10_YEAST	0	0	0	24382000	65702000	86033000	0	0	0	31410000	0	58983000	0	0	0	41667000	144850000	150610000	0	0	0	52156000	142430000	107870000
sp|P18411|FUN14_YEAST	FUN14	sp|P18411|FUN14_YEAST	14672000	0	0	20602000	18148000	18658000	0	0	0	19956000	20765000	0	0	20388000	0	0	0	0	0	16118000	0	16999000	0	0
sp|P18480|SNF5_YEAST	SNF5	sp|P18480|SNF5_YEAST	0	0	0	0	0	0	0	0	0	0	0	0	0	0	0	0	0	0	0	0	0	953180	0	0
sp|P18544|ARGD_YEAST	ARGD	sp|P18544|ARGD_YEAST	9836500	0	0	0	0	0	12719000	0	0	0	0	0	26618000	0	0	0	0	0	23724000	0	0	0	0	0
sp|P18562|UPP_YEAST	UPP	sp|P18562|UPP_YEAST	355260000	28391000	19129000	20655000	22833000	18221000	350900000	34479000	0	21762000	37505000	0	128220000	0	0	18416000	0	0	187670000	16885000	0	17440000	15548000	21259000
sp|P18759|SEC18_YEAST	SEC18	sp|P18759|SEC18_YEAST	48289000	59676000	62969000	49380000	52135000	57519000	50134000	68940000	42724000	71912000	72052000	67510000	48879000	65773000	62865000	45662000	39623000	42744000	53697000	82967000	59557000	42423000	37152000	0
sp|P18899|DDR48_YEAST	DDR48	sp|P18899|DDR48_YEAST	0	0	0	0	0	0	0	0	0	0	0	0	0	0	11923000	0	0	0	0	0	0	0	0	0
sp|P18961|YPK2_YEAST	YPK2	sp|P18961|YPK2_YEAST	20209000	0	0	0	0	0	0	0	0	0	0	0	29611000	0	0	0	0	0	21915000	0	0	0	0	0
sp|P18962|DAP2_YEAST	DAP2	sp|P18962|DAP2_YEAST	15838000	0	0	0	0	0	19726000	12808000	0	0	0	0	26227000	0	0	0	0	0	26346000	0	0	0	0	0
sp|P19073|CDC42_YEAST	CDC42	sp|P19073|CDC42_YEAST	27165000	0	0	24204000	29210000	31873000	21213000	0	0	31537000	33807000	0	0	0	0	24754000	19006000	0	0	0	0	23192000	0	21949000
sp|P19097|FAS2_YEAST	FAS2	sp|P19097|FAS2_YEAST	810380000	77441000000	15733000000	2779900000	1320600000	833980000	775220000	90501000000	27078000000	4191500000	1965200000	1184400000	335810000	74175000000	18894000000	2907200000	876530000	538950000	222050000	76123000000	13552000000	2247100000	843680000	510020000
sp|P19145|GAP1_YEAST	GAP1	sp|P19145|GAP1_YEAST	0	0	0	0	0	0	0	0	0	0	0	0	0	0	0	0	0	0	0	0	0	0	7903800	0
sp|P19146|ARF2_YEAST	ARF2	sp|P19146|ARF2_YEAST	0	0	0	0	0	0	0	0	0	0	0	0	0	0	0	0	0	0	0	0	0	5337500	0	0
sp|P19262|ODO2_YEAST	ODO2	sp|P19262|ODO2_YEAST	369500000	32106000000	4769000000	767310000	397430000	252040000	316290000	31245000000	7829800000	1150800000	551070000	313660000	467830000	23522000000	5760800000	824910000	389430000	292310000	527230000	22712000000	3479000000	726650000	547500000	479240000
sp|P19358|METK2_YEAST	METK2	sp|P19358|METK2_YEAST	1231700000	262230000	257810000	202630000	207240000	154200000	1432400000	349690000	294220000	214360000	227550000	202910000	741200000	195850000	177790000	165470000	115920000	108450000	685880000	180390000	205830000	135070000	129650000	118610000
sp|P19414|ACON_YEAST;sp|P39533|ACON2_YEAST	ACON	sp|P19414|ACON_YEAST	14051000000	5215900000	4052600000	2427800000	2576700000	1956000000	15240000000	4778600000	3477900000	2374900000	2629800000	2753200000	11390000000	3982700000	3589600000	2571100000	1820700000	1967300000	11304000000	4523000000	3440800000	2793100000	2837200000	2862500000
sp|P19454|CSK22_YEAST	CSK22	sp|P19454|CSK22_YEAST	70496000	8770400	14021000	0	0	0	65415000	16170000	0	37019000	0	0	112730000	28365000	0	20625000	0	0	82833000	34288000	0	28266000	0	17631000
sp|P19516|COX11_YEAST	COX11	sp|P19516|COX11_YEAST	24067000	0	0	22899000	0	0	32297000	0	0	21433000	29691000	0	0	0	0	0	0	0	0	0	0	0	0	0
sp|P19524|MYO2_YEAST	MYO2	sp|P19524|MYO2_YEAST	27481000	0	28045000	30539000	0	35587000	27106000	31992000	0	28233000	31542000	32316000	30094000	38187000	57030000	44099000	35822000	32770000	30052000	48060000	45416000	36712000	42675000	0
sp|P19736|PRP9_YEAST	PRP9	sp|P19736|PRP9_YEAST	0	0	0	0	0	0	0	0	0	0	0	0	0	0	0	0	0	0	1664300	0	0	0	0	0
sp|P19812|UBR1_YEAST	UBR1	sp|P19812|UBR1_YEAST	0	0	0	0	0	0	0	0	0	0	0	0	39837000	0	0	0	0	0	0	0	0	0	0	0
sp|P19882|HSP60_YEAST	HSP60	sp|P19882|HSP60_YEAST	3641800000	18808000000	3750700000	990170000	511330000	332480000	3174200000	21094000000	6159100000	1304700000	720330000	714940000	1392100000	9512100000	2578100000	404760000	200310000	80782000	1305100000	8487400000	2157000000	568790000	228910000	99101000
sp|P19955|RT31_YEAST	RT31	sp|P19955|RT31_YEAST	0	78107000	0	0	0	0	0	79333000	0	0	0	0	0	0	0	0	0	0	0	0	0	0	0	0
sp|P19956|RM44_YEAST	RM44	sp|P19956|RM44_YEAST	0	0	433200000	101720000	60936000	20537000	25827000	0	134560000	224090000	84402000	0	0	0	44461000	50054000	77961000	39043000	0	0	94809000	37003000	50962000	37562000
sp|P20049|TYR1_YEAST	TYR1	sp|P20049|TYR1_YEAST	20793000	19855000	0	0	0	0	39648000	34821000	0	0	0	0	44100000	38273000	28452000	0	18100000	0	40956000	45722000	0	0	0	0
sp|P20050|HOP1_YEAST	HOP1	sp|P20050|HOP1_YEAST	90844000	66720000	28003000	31050000	28899000	0	100840000	50349000	0	39771000	30873000	43427000	100350000	62716000	28698000	31364000	0	27230000	120660000	60264000	0	43617000	0	53509000
sp|P20084|RM33_YEAST	RM33	sp|P20084|RM33_YEAST	49893000	283230000	5796200000	3220100000	1623600000	234770000	0	320680000	5605800000	3497100000	4068500000	457650000	69029000	256990000	2408100000	976750000	1204800000	958520000	43191000	202290000	1884700000	1269200000	1529300000	1517200000
sp|P20107|ZRC1_YEAST	ZRC1	sp|P20107|ZRC1_YEAST	20889000	0	0	0	0	19788000	19827000	0	0	0	0	0	26613000	0	0	25155000	0	0	24776000	0	0	22214000	23952000	0
sp|P20424|SRP54_YEAST	SRP54	sp|P20424|SRP54_YEAST	42264000	0	0	0	0	0	33697000	0	0	0	0	0	23671000	26237000	0	0	0	0	20986000	0	0	0	0	0
sp|P20436|RPAB3_YEAST	RPAB3	sp|P20436|RPAB3_YEAST	0	0	0	0	0	0	0	0	0	0	0	0	0	0	0	0	0	0	0	0	0	21788000	0	0
sp|P20448|DBP4_YEAST	DBP4	sp|P20448|DBP4_YEAST	0	125170000	0	0	0	0	0	193390000	0	116010000	105900000	0	0	0	115490000	0	0	0	0	0	0	0	0	0
sp|P20449|DBP5_YEAST	DBP5	sp|P20449|DBP5_YEAST	86683000	11275000	0	8631100	8674900	0	143940000	0	0	8837900	9388100	8215800	79995000	11190000	10991000	0	0	9553700	57537000	11596000	0	8260700	8942300	0
sp|P20459|IF2A_YEAST	IF2A	sp|P20459|IF2A_YEAST	348960000	68771000	49846000	25004000	8706900	27158000	452090000	97604000	0	34746000	28087000	8555600	208850000	34356000	0	22911000	19521000	20585000	317670000	41636000	37299000	18951000	8551100	15822000
sp|P20485|KICH_YEAST	KICH	sp|P20485|KICH_YEAST	0	0	0	0	0	0	0	0	0	0	0	0	0	0	0	0	0	0	9101600	0	0	0	0	0
sp|P20486|CKS1_YEAST	CKS1	sp|P20486|CKS1_YEAST	30351000	0	0	0	0	0	0	0	0	0	0	0	0	0	0	0	0	0	0	0	0	0	0	0
sp|P20604|PP11_YEAST	PP11	sp|P20604|PP11_YEAST	0	16527000	0	0	0	0	0	0	0	0	0	0	0	0	0	0	0	0	0	0	0	0	0	0
sp|P20606|SAR1_YEAST	SAR1	sp|P20606|SAR1_YEAST	405140000	0	0	21986000	19791000	18743000	508180000	6478400	0	16889000	20295000	24561000	268290000	0	0	50591000	18685000	19922000	336150000	0	14223000	20154000	17570000	0
sp|P20967|ODO1_YEAST	ODO1	sp|P20967|ODO1_YEAST	3380900000	43990000000	8938300000	1998800000	1396400000	1025900000	2831000000	59893000000	10089000000	2526100000	1891200000	1232800000	3543000000	33315000000	8041800000	2575300000	1714000000	1600600000	3805800000	45265000000	6730000000	2759200000	2270000000	2315900000
sp|P21147|ACO1_YEAST	ACO1	sp|P21147|ACO1_YEAST	22181000	64900000	67323000	139060000	346340000	643630000	10350000	98599000	0	117190000	304100000	634770000	0	121880000	83508000	126200000	261030000	320170000	14037000	93714000	111930000	99570000	158710000	143020000
sp|P21242|PSA7_YEAST	PSA7	sp|P21242|PSA7_YEAST	167910000	198030000	29471000	72667000	46887000	47476000	142650000	254550000	34769000	63000000	53269000	51224000	167040000	320260000	48048000	84925000	41867000	27762000	122980000	207390000	62318000	56079000	31725000	21990000
sp|P21243|PSA1_YEAST	PSA1	sp|P21243|PSA1_YEAST	203480000	558610000	71152000	44738000	30083000	32475000	176100000	735780000	87676000	152770000	45583000	0	311310000	570960000	108070000	50178000	22764000	0	170670000	386170000	70412000	0	0	0
sp|P21264|PUR6_YEAST	PUR6	sp|P21264|PUR6_YEAST	296660000	159370000	101120000	83268000	86060000	44893000	279980000	225620000	0	90140000	86278000	71154000	311120000	165060000	98975000	86695000	59714000	58712000	300180000	135790000	49371000	90490000	67379000	46316000
sp|P21304|PWP1_YEAST	PWP1	sp|P21304|PWP1_YEAST	0	107560000	119690000	60444000	71468000	65053000	0	92282000	140600000	103240000	46566000	48466000	0	134150000	187110000	152470000	48876000	41141000	0	136170000	124940000	143690000	55699000	43777000
sp|P21306|ATP5E_YEAST	ATP5E	sp|P21306|ATP5E_YEAST	0	0	0	0	0	0	58290000	0	0	0	0	0	0	0	0	77461000	109780000	0	0	0	0	102380000	78153000	0
sp|P21375|OSM1_YEAST	OSM1	sp|P21375|OSM1_YEAST	23177000	28528000	35045000	41929000	69817000	222630000	8531400	44011000	0	35734000	83624000	193880000	0	86226000	90803000	122350000	322180000	411510000	0	0	0	97062000	203560000	183840000
sp|P21524|RIR1_YEAST;sp|P21672|RIR3_YEAST	RIR1	sp|P21524|RIR1_YEAST	75372000	0	0	0	0	0	64329000	0	0	0	0	0	54895000	0	0	32385000	0	0	50022000	0	0	0	0	0
sp|P21560|CBP3_YEAST	CBP3	sp|P21560|CBP3_YEAST	122540000	177580000	170210000	112520000	106020000	61999000	136380000	141730000	82906000	88933000	93548000	91341000	94757000	105000000	82105000	57964000	61295000	0	78042000	119390000	92472000	39832000	63474000	0
sp|P21576|VPS1_YEAST	VPS1	sp|P21576|VPS1_YEAST	570070000	921060000	197240000	131370000	97274000	104930000	570650000	955250000	242450000	164150000	139510000	89245000	803870000	784270000	276990000	144910000	64686000	83110000	752680000	543660000	131550000	133480000	63728000	62976000
sp|P21592|COX10_YEAST	COX10	sp|P21592|COX10_YEAST	0	0	0	0	21963000	30344000	0	0	0	0	0	0	0	0	0	0	0	0	0	0	0	0	0	0
sp|P21734|UBC1_YEAST	UBC1	sp|P21734|UBC1_YEAST	0	0	0	0	0	0	27735000	0	0	0	0	0	0	0	0	0	0	0	19766000	0	0	0	0	0
sp|P21771|RT28_YEAST	RT28	sp|P21771|RT28_YEAST	10120000	1617200000	269880000	432380000	893460000	163440000	27803000	1852400000	386690000	381060000	1113600000	284860000	0	1110100000	239160000	314420000	688330000	242500000	0	1016100000	173070000	291670000	806480000	460950000
sp|P21801|SDHB_YEAST	SDHB	sp|P21801|SDHB_YEAST	1925700000	589340000	603580000	784490000	650200000	609140000	1488100000	450480000	614600000	943160000	919390000	1321100000	1722800000	353580000	221830000	387620000	314350000	299650000	1453900000	293850000	307630000	435060000	380590000	357260000
sp|P21825|SEC62_YEAST	SEC62	sp|P21825|SEC62_YEAST	0	0	0	51234000	100220000	123250000	0	0	0	29221000	62397000	106330000	0	0	0	63516000	133970000	164430000	0	0	0	61524000	127160000	120350000
sp|P21827|RCC1_YEAST	RCC1	sp|P21827|RCC1_YEAST	0	0	0	0	0	0	29423000	0	0	0	0	0	0	0	0	0	0	0	0	0	0	0	0	0
sp|P21951|DPOE_YEAST	DPOE	sp|P21951|DPOE_YEAST	0	0	0	0	0	0	0	0	0	0	0	0	0	0	0	0	0	0	2376100	0	0	0	0	0
sp|P21954|IDHP_YEAST	IDHP	sp|P21954|IDHP_YEAST	664690000	89287000	167090000	108780000	66031000	69242000	595170000	126650000	95706000	114590000	99046000	99468000	620250000	199950000	206240000	165690000	121790000	89175000	591940000	159750000	97888000	150830000	130040000	114530000
sp|P21965|MCK1_YEAST	MCK1	sp|P21965|MCK1_YEAST	174700000	0	73296000	0	59354000	0	146580000	0	0	0	0	71314000	174350000	96878000	93392000	60371000	0	0	163360000	0	105650000	0	0	66930000
sp|P22023|KRE5_YEAST	KRE5	sp|P22023|KRE5_YEAST	15292000	0	0	0	0	0	15057000	0	0	0	0	0	23144000	0	0	0	0	0	15581000	0	0	0	0	0
sp|P22133|MDHC_YEAST	MDHC	sp|P22133|MDHC_YEAST	3303500000	1385000000	1122000000	660540000	806260000	622530000	2992000000	1223400000	1046400000	728290000	833100000	816660000	3976800000	1239000000	1282500000	744770000	507810000	545760000	2611700000	949100000	738650000	609870000	577230000	537950000
sp|P22135|ATP12_YEAST	ATP12	sp|P22135|ATP12_YEAST	90290000	0	0	0	0	0	179020000	0	0	0	0	0	52060000	0	0	21645000	0	0	55722000	0	0	0	0	0
sp|P22136|AEP2_YEAST	AEP2	sp|P22136|AEP2_YEAST	0	8608700	0	23088000	0	0	0	0	0	43073000	20247000	0	0	0	10587000	39769000	0	0	0	0	0	48892000	0	0
sp|P22137|CLH_YEAST	CLH	sp|P22137|CLH_YEAST	2466400000	1911600000	1495600000	1085600000	1194900000	935120000	2083400000	2042000000	1239800000	1094200000	1246800000	1088100000	3331600000	2567000000	2495400000	1768800000	1332400000	1103000000	2419300000	2495100000	2002900000	1865400000	1493400000	1206100000
sp|P22138|RPA2_YEAST	RPA2	sp|P22138|RPA2_YEAST	56737000	46359000	0	38787000	0	0	50227000	115530000	0	0	0	0	45707000	21327000	0	0	0	0	21693000	0	0	0	0	0
sp|P22139|RPAB5_YEAST	RPAB5	sp|P22139|RPAB5_YEAST	17162000	0	0	0	0	0	21139000	0	0	0	0	0	0	0	0	0	0	0	0	0	0	0	0	0
sp|P22141|PSB4_YEAST	PSB4	sp|P22141|PSB4_YEAST	161880000	40014000	25074000	0	0	0	101610000	88227000	34087000	8340400	12153000	0	274150000	36469000	0	7921200	0	0	60768000	33388000	0	52262000	0	0
sp|P22146|GAS1_YEAST	GAS1	sp|P22146|GAS1_YEAST	174550000	213550000	64527000	356260000	844960000	1936800000	155350000	120350000	151030000	261990000	576780000	993190000	226960000	266290000	360360000	312440000	759080000	1289600000	248230000	224640000	216680000	408010000	742180000	1150900000
sp|P22147|XRN1_YEAST	XRN1	sp|P22147|XRN1_YEAST	183250000	654860000	498690000	323150000	320570000	212220000	151010000	672980000	498200000	411520000	408870000	354390000	194410000	573140000	576670000	334240000	280620000	262200000	186100000	483700000	396360000	289890000	263750000	254200000
sp|P22202|HSP74_YEAST	HSP74	sp|P22202|HSP74_YEAST	14946000	0	0	0	0	0	0	0	0	0	0	0	0	0	0	0	0	0	0	0	0	0	0	0
sp|P22203|VATE_YEAST	VATE	sp|P22203|VATE_YEAST	455130000	84696000	307900000	85800000	180510000	496230000	454610000	64963000	0	67810000	135690000	332320000	590010000	224270000	66106000	162180000	362990000	417600000	451770000	176880000	87240000	219520000	364790000	335190000
sp|P22213|SLY1_YEAST	SLY1	sp|P22213|SLY1_YEAST	0	0	0	0	0	0	10911000	0	0	0	0	0	0	0	0	0	0	0	8311900	0	0	0	0	0
sp|P22214|SEC22_YEAST	SEC22	sp|P22214|SEC22_YEAST	7067100	0	0	0	0	0	0	0	0	0	0	0	0	0	0	0	0	0	0	0	0	0	0	0
sp|P22217|TRX1_YEAST	TRX1	sp|P22217|TRX1_YEAST	491270000	23973000	0	0	0	0	959680000	17615000	0	0	0	0	174690000	0	0	0	0	0	414230000	0	0	0	10375000	0
sp|P22276|RPC2_YEAST	RPC2	sp|P22276|RPC2_YEAST	14482000	23537000	0	0	0	0	11146000	54574000	0	0	0	0	0	13668000	0	0	0	0	0	12341000	0	0	0	0
sp|P22289|QCR9_YEAST	QCR9	sp|P22289|QCR9_YEAST	32573000	152220000	358600000	413580000	640840000	633950000	0	289200000	202220000	253930000	1007900000	722520000	0	171010000	276630000	1740500000	1793000000	4173800000	0	248600000	155350000	923310000	887880000	1618200000
sp|P22336|RFA1_YEAST	RFA1	sp|P22336|RFA1_YEAST	150460000	0	0	0	0	0	127390000	53594000	0	0	0	0	87571000	0	0	0	0	0	93995000	0	0	0	0	0
sp|P22353|RM08_YEAST	RM08	sp|P22353|RM08_YEAST	0	58002000	2214200000	1062200000	1016900000	168220000	0	18793000	1634500000	1355500000	1315000000	238990000	0	0	1405100000	477960000	701500000	259120000	0	29846000	1391400000	509020000	887160000	370940000
sp|P22354|RM20_YEAST	RM20	sp|P22354|RM20_YEAST	0	113910000	4539600000	688550000	874750000	161800000	0	146600000	3085600000	839030000	1024900000	218260000	0	0	1273900000	401240000	501130000	221790000	0	93858000	881310000	371120000	774170000	398560000
sp|P22515|UBA1_YEAST	UBA1	sp|P22515|UBA1_YEAST	721020000	21846000	25075000	65511000	39951000	18051000	684280000	27489000	17103000	57606000	39680000	16337000	1198400000	57165000	19974000	81150000	26666000	5415300	1366600000	71135000	28326000	81026000	19951000	16045000
sp|P22517|KCC2_YEAST	KCC2	sp|P22517|KCC2_YEAST	65755000	0	0	0	0	0	0	0	0	0	0	0	0	33937000	0	0	0	0	72414000	0	0	0	0	0
sp|P22579|SIN3_YEAST	SIN3	sp|P22579|SIN3_YEAST	14491000	0	0	0	0	0	0	0	0	0	0	0	0	16241000	0	0	0	0	14480000	0	0	0	0	0
sp|P22696|ESS1_YEAST	ESS1	sp|P22696|ESS1_YEAST	63518000	0	0	0	0	0	77429000	24601000	0	0	0	0	101590000	24980000	0	0	0	0	74774000	0	0	0	0	0
sp|P22768|ASSY_YEAST	ASSY	sp|P22768|ASSY_YEAST	1191400000	593100000	487460000	396090000	387980000	289660000	1075800000	690340000	237520000	389390000	381600000	433850000	1814100000	561370000	596230000	460800000	335810000	256380000	1163000000	445830000	423800000	387090000	330030000	257800000
sp|P22803|TRX2_YEAST	TRX2	sp|P22803|TRX2_YEAST	139510000	0	25145000	0	0	0	137910000	0	0	0	0	0	54861000	31680000	18423000	0	0	0	81391000	22592000	0	0	0	0
sp|P22855|MAN1_YEAST	MAN1	sp|P22855|MAN1_YEAST	180260000	1084400000	511960000	307870000	250640000	140230000	185550000	1017000000	460320000	241460000	249290000	227120000	257360000	1087700000	614340000	349070000	199230000	148420000	412280000	897070000	344110000	317380000	209420000	140360000
sp|P22943|HSP12_YEAST	HSP12	sp|P22943|HSP12_YEAST	209530000	0	157470000	0	61217000	0	222200000	0	0	0	0	0	49789000	0	0	0	0	0	50859000	0	0	0	0	0
sp|P23179|SPO11_YEAST	SPO11	sp|P23179|SPO11_YEAST	0	0	0	0	0	0	0	0	0	0	0	0	0	0	0	0	0	0	0	0	0	0	18805000	0
sp|P23180|AIM17_YEAST	AIM17	sp|P23180|AIM17_YEAST	240110000	0	27862000	12644000	11409000	23422000	258740000	0	0	13634000	11057000	0	198150000	0	0	12817000	16439000	0	274960000	0	20242000	17440000	13453000	12375000
sp|P23202|URE2_YEAST	URE2	sp|P23202|URE2_YEAST	36177000	0	0	0	0	0	24697000	0	0	0	0	0	25198000	15307000	0	0	0	0	22974000	14116000	0	0	0	0
sp|P23248|RS3A2_YEAST	RS3A2	sp|P23248|RS3A2_YEAST	0	497330000	478640000	8568200000	5545200000	8939000000	0	725790000	291150000	9135500000	5790900000	9155600000	0	1018700000	390210000	3775900000	5386700000	8260100000	10721000	1292600000	394890000	4342300000	4658100000	9625900000
sp|P23254|TKT1_YEAST	TKT1	sp|P23254|TKT1_YEAST	554860000	640720000	436660000	214900000	198150000	143370000	1059600000	542130000	318730000	231590000	192280000	212260000	2459900000	1014600000	922960000	444280000	246190000	178510000	2186500000	879300000	547980000	437110000	276320000	257710000
sp|P23292|KC12_YEAST;sp|P23291|KC11_YEAST	KC12	sp|P23292|KC12_YEAST	0	0	21820000	0	25974000	0	0	0	0	0	19702000	21716000	0	19605000	27959000	19040000	22837000	22054000	0	19750000	0	21430000	0	25643000
sp|P23301|IF5A1_YEAST;sp|P19211|IF5A2_YEAST	IF5A1	sp|P23301|IF5A1_YEAST	3457600000	751260000	324360000	143510000	139760000	141780000	3440100000	729000000	347540000	222850000	194130000	266290000	3220500000	646080000	507080000	215160000	118540000	123770000	2128200000	556490000	311990000	192680000	133340000	98646000
sp|P23337|GYS1_YEAST	GYS1	sp|P23337|GYS1_YEAST	0	16494000	0	17766000	0	10480000	0	17936000	0	11906000	0	0	25153000	32801000	0	18623000	18727000	0	30874000	0	0	18220000	19450000	0
sp|P23369|RM25_YEAST	RM25	sp|P23369|RM25_YEAST	0	36927000	3621300000	587180000	637790000	85049000	0	39313000	4665400000	672970000	698830000	122640000	12819000	58745000	1769000000	339130000	453630000	160960000	0	31716000	1061700000	245850000	617880000	165730000
sp|P23500|MRS4_YEAST	MRS4	sp|P23500|MRS4_YEAST	0	0	0	0	0	0	0	0	0	0	0	0	0	47693000	28204000	0	0	13265000	0	48165000	0	0	0	0
sp|P23542|AATC_YEAST	AATC	sp|P23542|AATC_YEAST	395310000	213270000	196220000	115670000	92041000	122300000	293520000	97276000	53235000	93675000	121920000	141660000	188130000	96565000	92776000	109910000	59720000	79557000	183930000	38870000	103460000	83910000	71531000	75365000
sp|P23585|HXT2_YEAST	HXT2	sp|P23585|HXT2_YEAST	0	0	0	0	0	0	0	11304000	0	0	0	0	0	0	0	0	0	0	0	0	0	0	0	0
sp|P23594|PP2A1_YEAST;sp|P23595|PP2A2_YEAST	PP2A1	sp|P23594|PP2A1_YEAST;sp|P23595|PP2A2_YEAST	21379000	0	0	16207000	0	0	41879000	0	0	0	0	0	0	0	0	20026000	0	0	0	0	0	0	15950000	0
sp|P23615|SPT6_YEAST	SPT6	sp|P23615|SPT6_YEAST	41151000	0	0	0	0	0	41084000	0	0	0	0	0	102560000	0	0	0	0	0	105620000	13595000	0	0	0	0
sp|P23638|PSA3_YEAST	PSA3	sp|P23638|PSA3_YEAST	237580000	270750000	130460000	78809000	33530000	30554000	179150000	380710000	107400000	52879000	39409000	53081000	235680000	443570000	118390000	65455000	98360000	24430000	165600000	176710000	77200000	47966000	0	0
sp|P23639|PSA2_YEAST	PSA2	sp|P23639|PSA2_YEAST	186450000	113410000	35193000	77883000	31918000	29388000	127060000	208810000	0	64615000	46171000	11223000	61221000	216710000	37484000	68847000	22962000	23355000	57068000	100450000	0	58734000	26122000	0
sp|P23641|MPCP_YEAST	MPCP	sp|P23641|MPCP_YEAST	1604300000	854370000	552690000	1585600000	1616800000	1508000000	2142600000	948320000	1079700000	1345500000	1657500000	1784600000	1233000000	1381400000	855400000	1655800000	1266100000	1266900000	1521900000	1353300000	1049800000	1647300000	1369600000	1170000000
sp|P23642|VAN1_YEAST	VAN1	sp|P23642|VAN1_YEAST	36111000	26303000	0	43956000	56196000	109640000	0	27496000	0	21214000	28988000	35854000	29372000	27884000	0	52899000	163700000	189920000	0	0	0	79479000	151860000	121910000
sp|P23644|TOM40_YEAST	TOM40	sp|P23644|TOM40_YEAST	295540000	379400000	324190000	1205800000	2011400000	2765200000	140140000	366080000	401570000	989030000	1738200000	2755400000	158450000	207090000	302910000	651340000	1340500000	1231900000	187500000	124440000	325680000	598780000	971560000	871730000
sp|P23724|PSB6_YEAST	PSB6	sp|P23724|PSB6_YEAST	78950000	122850000	88248000	74793000	46921000	65371000	111100000	72921000	0	76065000	58999000	59258000	125130000	62905000	0	77343000	42901000	26541000	91662000	69803000	66867000	62348000	45218000	28759000
sp|P23833|SCO1_YEAST	SCO1	sp|P23833|SCO1_YEAST	22863000	0	0	0	0	0	31709000	0	0	0	0	0	0	0	0	0	0	0	17374000	0	0	0	0	0
sp|P24000|RL24B_YEAST	RL24B	sp|P24000|RL24B_YEAST	5726800	0	461450000	10733000000	7549400000	16607000000	0	0	330600000	12061000000	9201600000	12636000000	0	49753000	897080000	7339400000	8182400000	15165000000	0	0	284030000	7444800000	6237500000	14957000000
sp|P24276|SSD1_YEAST	SSD1	sp|P24276|SSD1_YEAST	188480000	22618000	0	23980000	0	7258900	192680000	19570000	0	20269000	23819000	10070000	344870000	46569000	20433000	22646000	4848800	22987000	319270000	22064000	14483000	31491000	25567000	10996000
sp|P24279|MCM3_YEAST	MCM3	sp|P24279|MCM3_YEAST	13843000	0	0	0	0	0	15015000	0	0	0	0	0	18916000	0	0	0	0	0	14091000	0	0	0	0	0
sp|P24280|SEC14_YEAST	SEC14	sp|P24280|SEC14_YEAST	88810000	0	0	0	0	0	100170000	0	0	0	0	0	101280000	0	0	0	0	0	59256000	0	0	0	0	0
sp|P24521|ERG8_YEAST	ERG8	sp|P24521|ERG8_YEAST	111230000	0	40190000	0	0	0	80830000	36914000	0	0	0	0	60222000	0	0	0	0	0	43412000	0	0	0	0	0
sp|P24719|MEK1_YEAST	MEK1	sp|P24719|MEK1_YEAST	160960000	127440000	117730000	96550000	107100000	104180000	147810000	108010000	138070000	108800000	136380000	67088000	155480000	161190000	192840000	153020000	120150000	112360000	103330000	133530000	151610000	115190000	106850000	86011000
sp|P24783|DBP2_YEAST	DBP2	sp|P24783|DBP2_YEAST	0	0	0	0	0	0	0	12877000	0	25812000	0	0	0	0	0	0	0	0	0	0	0	0	0	0
sp|P24784|DBP1_YEAST	DBP1	sp|P24784|DBP1_YEAST	0	0	0	0	0	0	0	0	0	0	0	0	54310000	74655000	53333000	0	45302000	0	91393000	0	0	16711000	25667000	0
sp|P25037|UBP1_YEAST	UBP1	sp|P25037|UBP1_YEAST	0	0	0	0	0	0	41039000	33452000	0	0	0	0	32133000	0	0	0	0	0	36140000	0	0	0	0	0
sp|P25038|IF2M_YEAST	IF2M	sp|P25038|IF2M_YEAST	57088000	25833000	23001000	0	0	0	41409000	22388000	0	0	0	0	0	11669000	0	0	0	0	25720000	0	0	0	0	0
sp|P25039|EFGM_YEAST	EFGM	sp|P25039|EFGM_YEAST	802520000	133570000	132480000	106960000	88455000	72642000	1020400000	127950000	117900000	105220000	109770000	90879000	358050000	52416000	52506000	65512000	45344000	0	332820000	55355000	61533000	32239000	29735000	40541000
sp|P25043|PSB2_YEAST	PSB2	sp|P25043|PSB2_YEAST	41733000	214630000	0	0	0	0	0	256140000	0	0	0	0	0	63385000	0	0	0	0	0	126030000	0	0	0	0
sp|P25045|LCB1_YEAST	LCB1	sp|P25045|LCB1_YEAST	90315000	180950000	57930000	43607000	45922000	47576000	72735000	123410000	61612000	54563000	39515000	29086000	94495000	194560000	132410000	83059000	63984000	66929000	82690000	194140000	73314000	75027000	53009000	53129000
sp|P25087|ERG6_YEAST	ERG6	sp|P25087|ERG6_YEAST	414430000	410020000	129930000	124080000	84922000	137070000	332940000	276490000	142280000	119640000	142500000	145480000	689050000	497060000	481890000	258080000	194440000	198720000	429930000	498100000	243760000	236140000	218570000	203740000
sp|P25270|MRM1_YEAST	MRM1	sp|P25270|MRM1_YEAST	0	26644000	30815000	0	0	0	0	37244000	0	0	0	0	0	16291000	21083000	0	0	0	0	0	29395000	0	0	0
sp|P25293|NAP1_YEAST	NAP1	sp|P25293|NAP1_YEAST	430930000	107750000	58629000	140370000	103910000	3453300	396950000	113250000	70906000	40599000	114280000	0	462950000	186730000	93217000	48319000	23170000	0	454660000	175440000	98840000	65413000	0	54317000
sp|P25294|SIS1_YEAST	SIS1	sp|P25294|SIS1_YEAST	47586000	0	0	0	0	0	50001000	0	0	0	0	0	38403000	0	0	0	0	0	26933000	0	0	0	0	0
sp|P25303|SCJ1_YEAST	SCJ1	sp|P25303|SCJ1_YEAST	39778000	0	0	0	0	0	21341000	0	0	0	0	0	29413000	0	0	0	14740000	11538000	21329000	0	0	0	0	0
sp|P25335|ALLC_YEAST	ALLC	sp|P25335|ALLC_YEAST	6496800	0	0	0	0	0	13929000	0	0	0	0	0	0	0	0	0	0	0	0	0	0	0	0	0
sp|P25336|MSH3_YEAST	MSH3	sp|P25336|MSH3_YEAST	0	0	0	0	0	0	0	0	0	0	0	0	0	0	0	0	0	0	0	1853300	0	0	0	0
sp|P25338|YGB0_YEAST	YGB0	sp|P25338|YGB0_YEAST	16448000	0	0	0	0	0	0	0	0	0	0	0	0	61418000	0	15803000	0	27703000	0	0	0	0	0	26297000
sp|P25340|ERG4_YEAST	ERG4	sp|P25340|ERG4_YEAST	0	0	0	30115000	0	49965000	0	40883000	0	0	0	44852000	0	44947000	0	0	0	0	0	0	0	22492000	0	0
sp|P25342|CDC10_YEAST	CDC10	sp|P25342|CDC10_YEAST	131830000	63819000	58486000	50975000	100830000	53754000	126690000	59502000	0	34121000	61365000	35324000	181800000	77965000	74892000	52719000	34847000	39683000	172310000	57277000	0	71019000	26459000	63979000
sp|P25343|RV161_YEAST	RV161	sp|P25343|RV161_YEAST	0	0	0	0	0	0	0	0	0	0	0	0	0	13882000	0	0	0	0	35085000	0	0	0	0	0
sp|P25345|SYNM_YEAST	SYNM	sp|P25345|SYNM_YEAST	0	0	0	0	0	0	15633000	0	0	0	0	0	0	0	0	0	0	0	0	0	0	0	0	0
sp|P25348|RM32_YEAST	RM32	sp|P25348|RM32_YEAST	0	32823000	2280200000	43660000	59988000	16851000	0	25947000	2324400000	46602000	54362000	35874000	0	0	529290000	19632000	0	0	0	21519000	554700000	27531000	45568000	33980000
sp|P25349|YCP4_YEAST	YCP4	sp|P25349|YCP4_YEAST	0	0	0	24394000	21833000	99676000	20935000	0	0	0	0	0	0	0	0	19045000	32559000	69292000	16956000	0	0	28035000	0	40525000
sp|P25358|ELO2_YEAST	ELO2	sp|P25358|ELO2_YEAST	0	0	0	0	0	0	0	0	0	0	0	0	0	0	0	0	0	0	0	0	0	0	31362000	0
sp|P25359|RRP43_YEAST	RRP43	sp|P25359|RRP43_YEAST	0	0	0	0	0	0	0	0	0	0	0	0	0	0	0	0	0	0	0	2184000	0	0	0	0
sp|P25361|YCT3_YEAST	YCT3	sp|P25361|YCT3_YEAST	0	0	0	0	61208000	76671000	0	0	0	0	0	0	0	0	0	30408000	100920000	90044000	0	0	0	41134000	76501000	46043000
sp|P25365|SED4_YEAST	SED4	sp|P25365|SED4_YEAST	0	88599000	0	35451000	0	35169000	0	75414000	0	32774000	39516000	0	0	66968000	52007000	52057000	129720000	128530000	0	100570000	0	61793000	87944000	94352000
sp|P25368|RRP7_YEAST	RRP7	sp|P25368|RRP7_YEAST	0	0	0	56604000	0	0	0	0	0	69738000	0	0	0	0	0	55871000	0	0	0	0	0	57605000	0	0
sp|P25369|LSB5_YEAST	LSB5	sp|P25369|LSB5_YEAST	26446000	0	0	0	0	0	36997000	0	0	0	0	0	41153000	0	0	0	0	0	32291000	0	0	0	0	0
sp|P25371|ADP1_YEAST	ADP1	sp|P25371|ADP1_YEAST	0	150850000	116480000	104130000	179310000	270120000	24922000	87481000	81683000	61767000	128020000	167250000	0	153790000	129920000	114310000	301310000	291260000	16125000	161490000	112670000	128750000	228230000	169820000
sp|P25373|GLRX1_YEAST	GLRX1	sp|P25373|GLRX1_YEAST	134840000	26370000	0	0	0	0	277840000	0	0	0	0	0	165740000	0	0	0	0	0	124780000	0	0	0	0	0
sp|P25374|NFS1_YEAST	NFS1	sp|P25374|NFS1_YEAST	434920000	13333000	29011000	23523000	37749000	15272000	204530000	30456000	0	54113000	40178000	13383000	74549000	39840000	44742000	69778000	31961000	28849000	92443000	15521000	0	32921000	29764000	0
sp|P25375|PRTD_YEAST	PRTD	sp|P25375|PRTD_YEAST	429540000	10580000	0	6195700	0	4266500	267320000	9736300	0	4486700	5829700	10402000	83883000	10893000	10198000	5784000	8277400	0	216770000	12065000	0	3465300	6442900	4342900
sp|P25379|STDH_YEAST	STDH	sp|P25379|STDH_YEAST	86530000	0	0	0	0	0	81651000	0	0	0	0	0	66887000	0	0	0	0	0	73666000	0	0	0	0	0
sp|P25380|SPS22_YEAST	SPS22	sp|P25380|SPS22_YEAST	0	0	0	0	0	0	0	0	0	0	0	0	0	0	0	0	0	26145000	0	0	0	0	0	0
sp|P25441|RPC4_YEAST	RPC4	sp|P25441|RPC4_YEAST	0	20613000	0	0	0	0	0	31412000	0	0	0	0	0	9121900	0	0	0	0	0	6590300	0	0	0	0
sp|P25443|RS2_YEAST	RS2	sp|P25443|RS2_YEAST	355970000	4640000000	2071100000	20946000000	16145000000	40825000000	226790000	5172500000	1605200000	26220000000	20172000000	34243000000	440760000	5880100000	2750500000	13406000000	19039000000	32320000000	242600000	6289900000	1778300000	14697000000	14246000000	32335000000
sp|P25453|DMC1_YEAST	DMC1	sp|P25453|DMC1_YEAST	463620000	198740000	269630000	182240000	199900000	180550000	378490000	293540000	109260000	167820000	171810000	179990000	234980000	510150000	492690000	416090000	315740000	287350000	246490000	347800000	386590000	322650000	245380000	221010000
sp|P25454|RAD51_YEAST	RAD51	sp|P25454|RAD51_YEAST	14423000	0	0	0	0	0	16777000	4399500	0	0	0	0	0	0	0	0	0	0	0	0	0	0	0	0
sp|P25491|MAS5_YEAST	MAS5	sp|P25491|MAS5_YEAST	269120000	376180000	99531000	146240000	73335000	103460000	299600000	320820000	115470000	123280000	138180000	82625000	259730000	379780000	267610000	140760000	111240000	93554000	200680000	415850000	262770000	143470000	126160000	59869000
sp|P25515|VATL1_YEAST	VATL1	sp|P25515|VATL1_YEAST	0	0	0	0	0	0	0	0	0	0	0	0	0	0	0	0	0	0	0	0	0	0	0	21096000
sp|P25555|GBP2_YEAST	GBP2	sp|P25555|GBP2_YEAST	25179000	16213000	0	0	0	0	21566000	21085000	0	0	0	0	15321000	11461000	0	0	0	0	17891000	0	0	0	0	0
sp|P25567|SRO9_YEAST	SRO9	sp|P25567|SRO9_YEAST	3417200	0	0	0	0	0	0	0	0	0	0	0	0	0	0	0	0	0	0	0	0	0	0	0
sp|P25569|GID7_YEAST	GID7	sp|P25569|GID7_YEAST	0	0	0	0	0	0	13407000	0	0	0	0	0	0	0	0	0	0	0	7186200	0	0	0	0	0
sp|P25572|YCE2_YEAST	YCE2	sp|P25572|YCE2_YEAST	0	0	0	0	0	0	0	0	0	0	0	0	0	0	0	0	0	0	0	72796000	0	0	0	0
sp|P25573|MGR1_YEAST	MGR1	sp|P25573|MGR1_YEAST	33624000	115290000	96402000	69861000	85665000	98507000	49694000	137800000	89905000	73783000	90328000	136020000	131410000	68905000	68229000	60814000	108730000	93568000	86641000	72006000	67892000	50945000	76998000	55031000
sp|P25574|EMC1_YEAST	EMC1	sp|P25574|EMC1_YEAST	20783000	42983000	44601000	176220000	359380000	672130000	95881000	30681000	0	46032000	167370000	357340000	17035000	31626000	41919000	242770000	913780000	926730000	17362000	128240000	65017000	421870000	889470000	671860000
sp|P25580|PBN1_YEAST	PBN1	sp|P25580|PBN1_YEAST	22810000	38009000	0	30773000	53225000	88395000	0	55746000	61838000	31287000	41857000	64188000	0	28312000	25499000	31220000	61161000	68095000	0	37342000	0	34954000	53142000	43455000
sp|P25582|SPB1_YEAST	SPB1	sp|P25582|SPB1_YEAST	0	0	124360000	57075000	0	0	0	0	86797000	87952000	17264000	0	0	0	56542000	14398000	0	0	0	0	42644000	43810000	0	0
sp|P25586|KRR1_YEAST	KRR1	sp|P25586|KRR1_YEAST	0	34764000	69796000	427640000	108070000	53285000	0	56929000	63158000	412200000	176660000	47364000	0	23300000	108500000	412670000	63134000	34131000	0	0	82207000	427070000	92228000	54504000
sp|P25605|ILV6_YEAST	ILV6	sp|P25605|ILV6_YEAST	194230000	0	0	56230000	31576000	33211000	200900000	0	0	29525000	26640000	27485000	50701000	0	0	40120000	41685000	0	60728000	0	0	0	40076000	41599000
sp|P25613|ADY2_YEAST	ADY2	sp|P25613|ADY2_YEAST	276400000	2354100000	2381300000	1877400000	2852300000	7809500000	280500000	1933800000	2790400000	1258000000	1715800000	4169400000	501670000	4470600000	4373700000	4084100000	5990900000	13659000000	441400000	5173100000	5932600000	4052900000	7707300000	13447000000
sp|P25617|YCQ6_YEAST	YCQ6	sp|P25617|YCQ6_YEAST	0	62816000	0	0	0	0	0	72984000	86224000	0	0	0	0	40374000	0	0	0	0	0	49762000	0	0	0	0
sp|P25618|CWH43_YEAST	CWH43	sp|P25618|CWH43_YEAST	0	0	0	0	60656000	74012000	0	0	0	40887000	49411000	0	0	0	0	74698000	97500000	96274000	11678000	0	71230000	75684000	76476000	58776000
sp|P25619|HSP30_YEAST	HSP30	sp|P25619|HSP30_YEAST	0	0	0	0	0	0	0	0	0	0	0	0	0	24438000	0	0	0	51112000	0	0	0	0	0	0
sp|P25623|SYP1_YEAST	SYP1	sp|P25623|SYP1_YEAST	229290000	0	0	0	0	0	193760000	250580000	0	0	0	0	318350000	0	0	0	0	0	272500000	0	0	0	0	0
sp|P25626|IMG1_YEAST	IMG1	sp|P25626|IMG1_YEAST	0	84754000	3530800000	792320000	745940000	89733000	8914300	82807000	3583500000	959790000	985140000	160910000	0	86591000	1028900000	423650000	430360000	174590000	0	55294000	925720000	340830000	678300000	342010000
sp|P25632|RSC6_YEAST	RSC6	sp|P25632|RSC6_YEAST	0	0	0	0	0	0	0	0	0	0	0	0	0	4677500	0	0	0	0	0	0	0	0	0	0
sp|P25635|PWP2_YEAST	PWP2	sp|P25635|PWP2_YEAST	60784000	0	95497000	730920000	132130000	13036000	28526000	0	48359000	712960000	215510000	21185000	0	71316000	420930000	834780000	96426000	20919000	0	0	102630000	1178900000	144710000	16930000
sp|P25637|YIH1_YEAST	YIH1	sp|P25637|YIH1_YEAST	0	0	0	0	0	0	0	0	0	0	0	0	0	0	0	0	0	0	9047800	0	0	0	0	0
sp|P25639|YCV1_YEAST	YCV1	sp|P25639|YCV1_YEAST	0	24312000	0	14358000	0	0	0	43578000	0	0	0	0	0	0	0	0	0	0	0	0	0	0	0	0
sp|P25642|IMG2_YEAST	IMG2	sp|P25642|IMG2_YEAST	0	146470000	5264600000	738470000	725890000	220870000	0	117460000	6057300000	862310000	832010000	300730000	0	135610000	2327700000	455370000	546060000	265000000	0	123750000	1530700000	385430000	728920000	346260000
sp|P25644|PAT1_YEAST	PAT1	sp|P25644|PAT1_YEAST	2305400	0	0	0	0	0	7779900	0	0	0	0	0	3258700	0	0	0	0	0	1890500	0	0	0	0	0
sp|P25655|NOT1_YEAST	NOT1	sp|P25655|NOT1_YEAST	0	0	0	0	0	0	30609000	0	0	0	0	0	49572000	0	0	9895500	0	0	0	0	0	0	0	0
sp|P25694|CDC48_YEAST	CDC48	sp|P25694|CDC48_YEAST	1461700000	2645000000	1237100000	673790000	491160000	366990000	1457400000	2751600000	1217700000	660100000	587080000	495050000	1397000000	2431900000	1352100000	631240000	394640000	269730000	1246500000	2266300000	1216500000	634340000	363140000	225930000
sp|P25719|CYPC_YEAST	CYPC	sp|P25719|CYPC_YEAST	0	0	0	0	0	0	0	0	0	0	0	0	0	0	0	0	0	0	0	0	6373900	0	0	0
sp|P25847|MSH2_YEAST	MSH2	sp|P25847|MSH2_YEAST	0	0	0	0	0	0	0	5355400	0	0	0	0	16435000	0	0	0	0	0	15554000	0	0	0	0	0
sp|P26321|RL5_YEAST	RL5	sp|P26321|RL5_YEAST	696620000	460440000	3003800000	19449000000	16318000000	39326000000	347640000	486680000	2496800000	20909000000	16476000000	31831000000	480860000	542590000	2899200000	8657600000	15201000000	21142000000	319670000	831010000	3680800000	14571000000	13257000000	24159000000
sp|P26364|KAD3_YEAST	KAD3	sp|P26364|KAD3_YEAST	11474000	0	0	0	0	0	23542000	0	0	0	0	0	0	0	0	0	0	0	5057000	0	0	0	0	0
sp|P26637|SYLC_YEAST	SYLC	sp|P26637|SYLC_YEAST	449260000	5674900	0	3342300	0	0	496760000	4423400	0	4033300	2978600	0	823580000	2655500	6790500	6897100	2664600	0	951120000	8624600	0	6862000	5962300	0
sp|P26754|RFA2_YEAST	RFA2	sp|P26754|RFA2_YEAST	80152000	0	0	0	0	0	77716000	0	0	0	0	0	100610000	0	0	0	0	0	74086000	0	0	0	0	0
sp|P26755|RFA3_YEAST	RFA3	sp|P26755|RFA3_YEAST	0	0	0	0	0	0	0	0	0	0	0	0	0	0	0	0	0	0	34720000	0	0	0	0	0
sp|P26783|RS5_YEAST	RS5	sp|P26783|RS5_YEAST	256600000	3155500000	1238800000	22412000000	17737000000	37474000000	342700000	4515500000	1259100000	25937000000	21112000000	33671000000	365380000	4375200000	1704100000	11410000000	16861000000	30177000000	304710000	5266800000	1848300000	14345000000	14264000000	32944000000
sp|P26784|RL16A_YEAST	RL16A	sp|P26784|RL16A_YEAST	7963600	132380000	1398700000	15028000000	10877000000	19376000000	6725700	127940000	1332700000	16763000000	9895600000	19199000000	1951800	166180000	1695900000	6481600000	8214300000	13742000000	0	58849000	853690000	9620600000	6689200000	13994000000
sp|P26785|RL16B_YEAST	RL16B	sp|P26785|RL16B_YEAST	7581000	24338000	1691000000	12369000000	9380100000	13637000000	5313200	58953000	517970000	13733000000	10340000000	14913000000	11298000	28612000	988430000	5577300000	7483900000	9551500000	3351700	29133000	669670000	7399300000	7314600000	15528000000
sp|P26786|RS7A_YEAST	RS7A	sp|P26786|RS7A_YEAST	62806000	1524600000	1252100000	23587000000	18829000000	38501000000	40012000	2667000000	506550000	25629000000	21368000000	29904000000	13093000	3943300000	1820100000	12943000000	18509000000	29891000000	17770000	4675500000	417780000	15080000000	17645000000	36098000000
sp|P26793|FEN1_YEAST	FEN1	sp|P26793|FEN1_YEAST	0	0	0	0	0	0	8050000	0	0	0	0	0	12083000	0	0	0	0	0	11204000	0	0	0	0	0
sp|P27466|KCC1_YEAST	KCC1	sp|P27466|KCC1_YEAST	0	0	0	0	0	0	0	0	0	0	0	0	0	0	0	0	0	0	2358400	0	0	0	0	0
sp|P27472|GYS2_YEAST	GYS2	sp|P27472|GYS2_YEAST	103550000	78433000	42010000	52122000	46443000	31189000	82327000	92678000	0	47025000	44384000	40562000	105830000	134950000	67323000	80764000	59549000	52338000	147020000	125390000	78397000	96668000	57715000	51990000
sp|P27476|NSR1_YEAST	NSR1	sp|P27476|NSR1_YEAST	84186000	366380000	523460000	668190000	899200000	609730000	118970000	265310000	167870000	326860000	455390000	385270000	136410000	239240000	332570000	232080000	139300000	59514000	122880000	117580000	109730000	178140000	134080000	57082000
sp|P27614|CBPS_YEAST	CBPS	sp|P27614|CBPS_YEAST	402010000	73949000	26500000	0	0	0	471390000	53149000	0	0	21263000	19665000	725160000	48473000	0	0	77262000	0	585080000	48661000	0	0	0	0
sp|P27616|PUR7_YEAST	PUR7	sp|P27616|PUR7_YEAST	914790000	11857000	7763000	20322000	2701000	0	933730000	9492800	0	10540000	11545000	0	787600000	7019800	7029500	3295700	0	0	725040000	5994000	0	5661300	2616100	0
sp|P27692|SPT5_YEAST	SPT5	sp|P27692|SPT5_YEAST	33927000	0	26698000	0	0	0	42826000	30915000	0	0	0	0	59184000	38043000	33784000	0	0	0	62106000	30410000	0	0	0	0
sp|P27796|THIK_YEAST	THIK	sp|P27796|THIK_YEAST	102610000	0	0	0	0	0	147690000	0	0	0	0	0	70901000	0	0	33448000	0	0	76420000	0	0	0	0	0
sp|P27801|PEP3_YEAST	PEP3	sp|P27801|PEP3_YEAST	0	0	0	0	0	0	0	0	0	0	0	0	0	0	90014000	0	0	0	0	0	0	0	0	0
sp|P27809|KRE2_YEAST	KRE2	sp|P27809|KRE2_YEAST	0	0	0	0	0	0	0	0	0	0	0	0	0	0	0	0	0	0	0	0	0	0	0	12312000
sp|P27810|KTR1_YEAST	KTR1	sp|P27810|KTR1_YEAST	12589000	75139000	46126000	57008000	79122000	174570000	0	71338000	0	43995000	62508000	146470000	0	17632000	31051000	50727000	155060000	147980000	70270000	22993000	0	42885000	89884000	68824000
sp|P27929|NAM9_YEAST	NAM9	sp|P27929|NAM9_YEAST	30833000	3326700000	485850000	849310000	1457600000	326830000	14146000	1953500000	369710000	746390000	1785100000	523000000	0	1006400000	179040000	583110000	768550000	436210000	0	1738900000	206190000	544510000	1317400000	735880000
sp|P28000|RPAC2_YEAST	RPAC2	sp|P28000|RPAC2_YEAST	0	0	0	0	0	0	0	0	0	0	0	0	0	0	0	0	0	0	9211800	0	0	0	0	0
sp|P28007|GAR1_YEAST	GAR1	sp|P28007|GAR1_YEAST	15043000	110480000	261890000	194700000	229910000	263290000	14748000	104240000	143450000	244730000	340900000	244530000	43549000	115930000	206000000	249390000	211700000	170620000	38465000	84688000	119600000	234340000	292910000	167150000
sp|P28239|IPYR2_YEAST	IPYR2	sp|P28239|IPYR2_YEAST	0	0	0	0	0	0	0	0	0	0	0	0	0	0	0	0	0	0	2876500	0	0	0	0	0
sp|P28240|ACEA_YEAST	ACEA	sp|P28240|ACEA_YEAST	10342000000	3375700000	1972800000	1566500000	1226700000	882790000	9308500000	5357300000	2404700000	1815700000	1291700000	1404000000	8946600000	3952100000	2341500000	1268700000	829990000	671910000	6947100000	2682900000	1681400000	1286100000	921030000	684860000
sp|P28241|IDH2_YEAST	IDH2	sp|P28241|IDH2_YEAST	1514100000	940150000	378610000	410450000	360420000	388350000	1641800000	1350900000	695860000	511320000	492800000	515820000	1713700000	1058100000	651350000	558700000	477010000	525950000	1438200000	666150000	576330000	549590000	410770000	516450000
sp|P28263|UBC8_YEAST	UBC8	sp|P28263|UBC8_YEAST	53830000	0	0	0	0	0	34685000	0	0	0	0	0	29333000	0	0	0	0	0	19482000	0	0	0	0	0
sp|P28272|PYRD_YEAST	PYRD	sp|P28272|PYRD_YEAST	51806000	0	0	0	0	0	48988000	0	0	0	0	0	234460000	0	0	0	0	0	199370000	0	0	0	0	0
sp|P28273|OPLA_YEAST	OPLA	sp|P28273|OPLA_YEAST	0	0	0	0	0	0	0	0	0	0	0	0	0	0	0	0	0	0	5984500	0	0	0	0	0
sp|P28274|URA7_YEAST	URA7	sp|P28274|URA7_YEAST	24753000	0	0	0	0	0	24509000	0	0	0	0	0	30992000	18733000	0	5155100	0	0	35076000	14877000	0	0	0	0
sp|P28319|CWP1_YEAST	CWP1	sp|P28319|CWP1_YEAST	143840000	73470000	242880000	365980000	923340000	1460900000	120390000	77463000	86323000	226400000	616260000	601510000	121140000	0	185850000	358820000	662500000	789230000	128450000	0	69884000	309910000	716600000	731860000
sp|P28321|MGLL_YEAST	MGLL	sp|P28321|MGLL_YEAST	34184000	25348000	0	0	0	0	0	0	0	0	0	0	0	0	0	0	0	0	0	15950000	0	0	0	0
sp|P28496|LAC1_YEAST	LAC1	sp|P28496|LAC1_YEAST	0	0	0	0	0	0	0	0	0	0	0	0	0	0	0	0	0	0	0	0	0	7077800	0	0
sp|P28625|YIM1_YEAST	YIM1	sp|P28625|YIM1_YEAST	73606000	73750000	19233000	21002000	21876000	17902000	75307000	35918000	0	0	18726000	28125000	97726000	70271000	24690000	0	41120000	0	118540000	69241000	0	31904000	20462000	0
sp|P28627|IMP1_YEAST	IMP1	sp|P28627|IMP1_YEAST	0	0	0	0	0	0	0	0	0	0	0	0	0	0	0	0	0	0	3552900	0	0	0	0	0
sp|P28707|SBA1_YEAST	SBA1	sp|P28707|SBA1_YEAST	31518000	0	0	0	0	0	92887000	13157000	0	0	0	0	32874000	8860600	0	0	0	0	23045000	0	0	0	0	0
sp|P28737|MSP1_YEAST	MSP1	sp|P28737|MSP1_YEAST	33577000	0	0	0	0	42761000	0	58919000	0	24031000	47495000	0	0	0	0	0	0	0	0	0	0	0	0	0
sp|P28777|AROC_YEAST	AROC	sp|P28777|AROC_YEAST	42285000	0	0	0	0	0	54333000	0	0	0	0	0	20710000	0	0	0	0	0	27738000	0	0	0	0	0
sp|P28778|RT06_YEAST	RT06	sp|P28778|RT06_YEAST	0	104690000	0	82955000	138980000	49366000	0	191130000	0	88406000	226840000	24807000	0	187920000	0	61445000	108570000	19047000	0	73183000	0	50443000	142470000	62889000
sp|P28789|HEM3_YEAST	HEM3	sp|P28789|HEM3_YEAST	0	0	0	0	0	0	0	0	0	0	0	0	0	11645000	0	0	0	0	0	0	0	0	0	0
sp|P28817|HIBCH_YEAST	HIBCH	sp|P28817|HIBCH_YEAST	19740000	0	37123000	42146000	49505000	28217000	0	0	0	68778000	112270000	24063000	23676000	0	0	0	0	0	0	0	0	101810000	52836000	33819000
sp|P28834|IDH1_YEAST	IDH1	sp|P28834|IDH1_YEAST	3002100000	920330000	861220000	636420000	545360000	474760000	3280900000	1298200000	913850000	737380000	627660000	699510000	2810100000	1114400000	844510000	657540000	443520000	360850000	2642400000	973440000	939640000	714520000	513080000	457530000
sp|P29311|BMH1_YEAST	BMH1	sp|P29311|BMH1_YEAST	310940000	83838000	111170000	37423000	0	0	315160000	63960000	118000000	42659000	59824000	60348000	338270000	65890000	59116000	31082000	13397000	0	186120000	66762000	52521000	29744000	0	0
sp|P29366|BEM1_YEAST	BEM1	sp|P29366|BEM1_YEAST	0	0	0	0	0	0	0	0	0	0	0	0	0	0	0	0	0	0	2549600	0	0	0	0	0
sp|P29453|RL8B_YEAST	RL8B	sp|P29453|RL8B_YEAST	0	399860000	250170000	2104500000	1491400000	3475200000	33400000	338550000	236720000	2027100000	1985000000	1780800000	13971000	368330000	247380000	1276700000	1939000000	2306200000	0	424070000	389460000	1938500000	1596900000	3608800000
sp|P29465|CHS3_YEAST	CHS3	sp|P29465|CHS3_YEAST	0	0	0	0	0	0	0	0	0	0	0	0	0	0	0	1580500	0	0	0	0	0	0	0	0
sp|P29468|PAP_YEAST	PAP	sp|P29468|PAP_YEAST	13550000	0	0	0	0	0	12093000	0	0	0	0	0	25862000	0	0	0	0	0	15198000	0	0	0	0	0
sp|P29478|SEC65_YEAST	SEC65	sp|P29478|SEC65_YEAST	13722000	0	0	0	0	0	11188000	0	0	0	0	0	13088000	0	0	0	0	0	14606000	0	0	0	0	0
sp|P29509|TRXB1_YEAST;sp|P38816|TRXB2_YEAST	TRXB1	sp|P29509|TRXB1_YEAST	188340000	5970400	0	0	0	0	179210000	0	0	0	0	0	177280000	0	0	19155000	0	0	185320000	0	0	0	0	0
sp|P29547|EF1G1_YEAST	EF1G1	sp|P29547|EF1G1_YEAST	1184000000	213710000	75752000	91906000	24432000	67834000	1037800000	281220000	63941000	89737000	110060000	39665000	1558900000	241990000	121410000	126820000	34623000	20307000	1367600000	164340000	28937000	82720000	40788000	13983000
sp|P29704|FDFT_YEAST	FDFT	sp|P29704|FDFT_YEAST	134060000	282750000	187750000	123050000	129530000	99130000	102070000	260960000	166900000	103730000	114190000	164310000	137170000	256760000	234070000	143410000	143010000	124120000	151490000	270010000	226220000	155360000	163860000	118820000
sp|P29952|MPI_YEAST	MPI	sp|P29952|MPI_YEAST	486930000	20062000	16615000	15254000	6326100	11931000	603190000	21038000	0	16056000	14645000	15157000	215200000	21816000	15989000	15237000	7830900	9732300	350270000	17702000	15173000	7719100	9071300	0
sp|P30619|SEC1_YEAST	SEC1	sp|P30619|SEC1_YEAST	0	0	0	0	0	0	0	0	0	0	0	0	0	0	0	0	0	0	5643800	0	0	0	0	0
sp|P30624|LCF1_YEAST	LCF1	sp|P30624|LCF1_YEAST	1389000000	309040000	378170000	668060000	760760000	597440000	792440000	259550000	136460000	447540000	552950000	527160000	820380000	349250000	244630000	539920000	488060000	466660000	821910000	296450000	450490000	512230000	438390000	460530000
sp|P30656|PSB5_YEAST	PSB5	sp|P30656|PSB5_YEAST	1871400000	1809800000	1153000000	1826200000	1264000000	1435200000	1877200000	2205300000	1902500000	1933900000	1456300000	0	2436100000	0	0	2312300000	968910000	1504300000	1996300000	0	0	1233100000	1161200000	1405900000
sp|P30657|PSB7_YEAST	PSB7	sp|P30657|PSB7_YEAST	143610000	52332000	0	72995000	55231000	57902000	124270000	112540000	0	96789000	69540000	60867000	108030000	108910000	22010000	95656000	60543000	51457000	98924000	74496000	55963000	94182000	49208000	45550000
sp|P30665|MCM4_YEAST	MCM4	sp|P30665|MCM4_YEAST	0	0	0	0	0	0	0	0	0	0	0	0	0	0	0	0	0	0	12895000	0	0	0	0	0
sp|P30771|NAM7_YEAST	NAM7	sp|P30771|NAM7_YEAST	26590000	0	35700000	101790000	132260000	72951000	19897000	37643000	0	85314000	141860000	85597000	30874000	17412000	37638000	124860000	116340000	67415000	27175000	18699000	42525000	86579000	115520000	85452000
sp|P30775|RF1M_YEAST	RF1M	sp|P30775|RF1M_YEAST	14690000	0	0	0	0	0	13616000	0	0	0	0	0	0	0	0	0	0	0	0	0	0	0	0	0
sp|P30822|XPO1_YEAST	XPO1	sp|P30822|XPO1_YEAST	32068000	37378000	0	0	0	20076000	50802000	18110000	0	0	0	0	66545000	51090000	76945000	32815000	0	18438000	103420000	74156000	45897000	30925000	0	0
sp|P30902|ATP7_YEAST	ATP7	sp|P30902|ATP7_YEAST	348890000	181240000	923050000	379640000	200300000	149280000	453110000	101980000	102570000	318670000	222070000	204240000	678780000	162000000	120850000	1036600000	701410000	532610000	394430000	464240000	657120000	1057000000	544410000	362610000
sp|P30952|MASY_YEAST	MASY	sp|P30952|MASY_YEAST	4486000000	2544100000	1898100000	1221800000	1278700000	1038300000	4166600000	2938500000	1728800000	1295400000	1375000000	1475500000	5568100000	3164800000	2623200000	1891200000	1238200000	1289000000	5020500000	2712500000	2349100000	1699800000	1448900000	1342200000
sp|P31111|ZIP1_YEAST	ZIP1	sp|P31111|ZIP1_YEAST	110050000	405740000	316540000	119940000	82603000	36655000	71351000	559190000	225560000	179320000	151150000	99032000	103660000	135820000	113720000	60900000	39140000	0	70120000	111620000	0	50313000	34397000	0
sp|P31116|DHOM_YEAST	DHOM	sp|P31116|DHOM_YEAST	813830000	92854000	71468000	29581000	23456000	5759000	923860000	79359000	0	51455000	32156000	62863000	901980000	124770000	101740000	25304000	20786000	10087000	1019700000	84827000	35168000	47985000	27017000	7726800
sp|P31334|RM09_YEAST	RM09	sp|P31334|RM09_YEAST	0	255710000	5441500000	675830000	687900000	185520000	0	131050000	4998100000	810170000	968110000	148930000	0	64633000	1892100000	247540000	361340000	153410000	0	83123000	1285800000	392380000	546520000	165870000
sp|P31373|CYS3_YEAST	CYS3	sp|P31373|CYS3_YEAST	471690000	19623000	0	6406700	0	0	362990000	30549000	0	5494400	12232000	0	366100000	25013000	11662000	4904100	3880100	0	458540000	18629000	0	6303000	0	0
sp|P31379|YAB8_YEAST	YAB8	sp|P31379|YAB8_YEAST	0	0	0	16960000	14021000	0	0	0	0	15791000	0	19057000	23235000	75511000	33220000	50198000	26639000	65735000	0	22965000	0	16057000	19011000	22005000
sp|P31382|PMT2_YEAST	PMT2	sp|P31382|PMT2_YEAST	69197000	614650000	537540000	242010000	326550000	449290000	69381000	334880000	356880000	209620000	273160000	476540000	164250000	149550000	418820000	288740000	508680000	390130000	127780000	410860000	351470000	244120000	368600000	259490000
sp|P31383|2AAA_YEAST	2AAA	sp|P31383|2AAA_YEAST	47556000	0	0	0	0	0	130930000	0	0	16276000	0	0	60170000	23417000	0	18816000	0	0	57651000	0	0	0	0	0
sp|P31384|CCR4_YEAST	CCR4	sp|P31384|CCR4_YEAST	36985000	0	0	0	0	0	29546000	0	0	0	0	0	39225000	0	0	0	0	0	40148000	0	0	0	0	0
sp|P31412|VATC_YEAST	VATC	sp|P31412|VATC_YEAST	213060000	87572000	109420000	93489000	181340000	456550000	221270000	89018000	40769000	50882000	101140000	257640000	303350000	188640000	120570000	121710000	270640000	376310000	238470000	195320000	204000000	164470000	322670000	376450000
sp|P31539|HS104_YEAST	HS104	sp|P31539|HS104_YEAST	1161100000	91623000	49538000	19362000	4035900	7028600	1200700000	62263000	0	23561000	26075000	6041700	1168500000	77567000	39082000	22699000	3629300	9163000	1771700000	99069000	8601700	9406200	3881100	0
sp|P31688|TPS2_YEAST	TPS2	sp|P31688|TPS2_YEAST	166960000	91816000	36119000	0	25721000	0	187460000	85397000	71733000	48506000	16225000	34263000	180140000	113960000	80888000	37196000	42555000	17166000	426480000	73846000	0	46926000	23068000	19263000
sp|P32048|SYKM_YEAST	SYKM	sp|P32048|SYKM_YEAST	0	0	0	0	0	0	0	0	0	0	0	0	0	0	0	0	0	0	7515600	0	0	0	0	0
sp|P32074|COPG_YEAST	COPG	sp|P32074|COPG_YEAST	127730000	37595000	28931000	17007000	0	0	161200000	23327000	0	17187000	17352000	23348000	190250000	50787000	23573000	20553000	16782000	0	162560000	22187000	0	21886000	25614000	16281000
sp|P32190|GLPK_YEAST	GLPK	sp|P32190|GLPK_YEAST	23356000	30397000	0	0	0	0	21949000	24971000	0	0	0	0	43451000	29896000	0	0	0	0	46029000	55769000	0	0	0	0
sp|P32191|GPDM_YEAST	GPDM	sp|P32191|GPDM_YEAST	1527800000	976740000	593030000	531600000	525290000	453220000	1487300000	474980000	445690000	496550000	545240000	595840000	1514200000	687410000	455500000	648110000	587780000	543550000	1499300000	746630000	581130000	738810000	771980000	646190000
sp|P32263|P5CR_YEAST	P5CR	sp|P32263|P5CR_YEAST	311100000	143280000	51823000	46283000	0	109820000	221500000	145470000	63915000	61378000	49384000	69272000	252340000	169130000	71586000	53834000	36064000	14414000	210950000	85286000	51345000	31303000	0	30088000
sp|P32266|MGM1_YEAST	MGM1	sp|P32266|MGM1_YEAST	0	0	0	0	0	0	0	0	0	0	0	0	0	0	0	0	0	0	6122300	0	0	0	0	0
sp|P32288|GLNA_YEAST	GLNA	sp|P32288|GLNA_YEAST	326470000	372840000	172160000	192600000	130280000	68836000	316980000	863330000	273680000	273430000	247550000	136780000	259230000	434880000	156870000	88957000	86290000	40317000	225390000	364660000	146450000	133280000	86924000	71752000
sp|P32316|ACH1_YEAST	ACH1	sp|P32316|ACH1_YEAST	543040000	2810900000	2127800000	746590000	862420000	826870000	452600000	2219400000	1446600000	725880000	893550000	939920000	722010000	3372700000	3222700000	1244800000	910630000	813950000	637730000	3159900000	2674700000	1167200000	1212300000	1003700000
sp|P32317|AFG1_YEAST	AFG1	sp|P32317|AFG1_YEAST	38352000	0	0	0	0	0	39936000	0	0	0	0	0	20837000	0	0	0	0	0	22217000	0	0	0	0	0
sp|P32319|VPS10_YEAST	VPS10	sp|P32319|VPS10_YEAST	0	22224000	15750000	0	0	0	13834000	0	0	0	0	0	16327000	18471000	0	0	0	0	13760000	19501000	0	0	0	0
sp|P32324|EF2_YEAST	EF2	sp|P32324|EF2_YEAST	6222900000	2502000000	1856200000	1433900000	1424700000	1179200000	5920100000	2371400000	1838600000	1446300000	1654200000	1575900000	6584800000	2978800000	2721000000	2099500000	1617000000	1536000000	6776500000	2964100000	2760100000	2097500000	1923500000	1773900000
sp|P32327|PYC2_YEAST	PYC2	sp|P32327|PYC2_YEAST	77057000	0	0	0	15244000	0	77171000	14693000	0	0	0	0	293520000	0	0	0	0	0	326640000	0	0	13027000	17553000	0
sp|P32329|YPS1_YEAST	YPS1	sp|P32329|YPS1_YEAST	0	0	0	0	0	0	0	0	0	0	0	0	0	0	0	0	0	0	0	0	0	0	16211000	0
sp|P32331|YMC1_YEAST	YMC1	sp|P32331|YMC1_YEAST	18461000	0	0	19911000	24792000	0	18768000	0	0	19915000	33369000	24005000	11128000	0	0	17769000	21602000	27107000	0	0	0	0	25359000	0
sp|P32332|OAC1_YEAST	OAC1	sp|P32332|OAC1_YEAST	17981000	0	0	16679000	18412000	20840000	16671000	0	0	0	19852000	34371000	0	0	0	12868000	0	0	0	0	0	0	0	0
sp|P32335|MSS51_YEAST	MSS51	sp|P32335|MSS51_YEAST	310170000	568520000	435360000	274800000	347780000	465880000	207300000	555530000	253570000	223880000	330300000	492860000	124520000	124400000	100270000	66242000	150720000	133630000	107970000	148090000	79482000	83606000	107220000	90575000
sp|P32337|IMB3_YEAST	IMB3	sp|P32337|IMB3_YEAST	0	0	0	0	0	0	0	0	0	0	0	0	0	0	0	0	0	0	2995300	0	0	0	0	0
sp|P32340|NDI1_YEAST	NDI1	sp|P32340|NDI1_YEAST	1971400000	1067800000	969310000	1133700000	1117000000	979740000	1779600000	1361700000	595010000	938210000	1099600000	1003800000	817990000	809570000	503100000	755130000	635950000	678620000	862280000	732690000	766910000	645040000	655560000	598880000
sp|P32347|DCUP_YEAST	DCUP	sp|P32347|DCUP_YEAST	37553000	0	0	0	0	0	37066000	0	0	0	0	0	58775000	0	0	0	0	0	47730000	0	0	0	0	0
sp|P32349|RPC3_YEAST	RPC3	sp|P32349|RPC3_YEAST	0	77739000	0	0	0	0	0	75353000	0	0	0	0	0	69424000	204360000	0	0	0	0	64739000	0	0	0	0
sp|P32351|IMPX_YEAST	IMPX	sp|P32351|IMPX_YEAST	10792000	0	0	0	0	0	11869000	0	0	0	0	0	11526000	0	0	0	0	0	0	0	0	0	0	0
sp|P32352|ERG2_YEAST	ERG2	sp|P32352|ERG2_YEAST	89701000	95196000	0	0	0	0	68812000	142360000	0	0	0	0	0	63338000	0	0	0	0	78018000	70098000	0	0	0	0
sp|P32353|ERG3_YEAST	ERG3	sp|P32353|ERG3_YEAST	0	0	0	0	0	0	0	0	0	0	0	0	0	0	0	0	0	0	9934100	0	0	0	0	0
sp|P32356|TREA_YEAST	TREA	sp|P32356|TREA_YEAST	95727000	48687000	0	0	0	0	90990000	0	0	0	0	0	85295000	50041000	32028000	0	0	0	55998000	46483000	37111000	0	0	0
sp|P32364|SMY1_YEAST	SMY1	sp|P32364|SMY1_YEAST	0	0	0	0	0	0	0	0	0	0	0	0	3579400	0	0	0	0	0	0	0	0	0	0	0
sp|P32366|VA0D_YEAST	VA0D	sp|P32366|VA0D_YEAST	28460000	32902000	15181000	60888000	198070000	1776500000	15206000	57776000	15480000	59731000	93964000	262120000	10719000	50899000	36734000	201280000	705070000	1135100000	43691000	70364000	111680000	234240000	793590000	1076800000
sp|P32368|SAC1_YEAST	SAC1	sp|P32368|SAC1_YEAST	89106000	165280000	139940000	111600000	96333000	91840000	78154000	171220000	88409000	80056000	87850000	82135000	98321000	183780000	174530000	124430000	140740000	155450000	82857000	148740000	157770000	135180000	141900000	109290000
sp|P32377|MVD1_YEAST	MVD1	sp|P32377|MVD1_YEAST	113080000	78614000	34911000	20783000	28125000	35772000	147850000	68082000	41870000	31523000	31263000	27603000	92141000	63463000	45079000	41163000	30813000	33597000	51271000	78629000	0	37132000	32692000	30208000
sp|P32378|COQ2_YEAST	COQ2	sp|P32378|COQ2_YEAST	0	0	0	0	0	69883000	0	0	0	0	17519000	0	0	0	0	11564000	0	0	0	0	0	0	21488000	0
sp|P32379|PSA5_YEAST	PSA5	sp|P32379|PSA5_YEAST	216970000	493940000	0	0	0	0	145800000	607430000	0	0	0	0	40470000	248570000	87438000	52742000	41456000	0	110890000	254530000	0	47107000	0	0
sp|P32380|SP110_YEAST	SP110	sp|P32380|SP110_YEAST	0	0	0	0	0	0	0	0	0	1770400000	0	0	0	0	0	0	0	0	0	0	0	0	0	0
sp|P32381|ARP2_YEAST	ARP2	sp|P32381|ARP2_YEAST	241970000	56074000	77420000	37645000	21076000	18576000	223000000	54759000	0	32833000	41579000	17473000	306790000	68316000	32185000	36791000	16219000	19820000	240610000	31916000	0	28200000	15437000	0
sp|P32385|RNP1_YEAST	RNP1	sp|P32385|RNP1_YEAST	99474000	1413700000	1932500000	597290000	242770000	125400000	84485000	1273000000	2259600000	1651800000	580030000	304140000	147300000	1629900000	3176400000	947590000	397120000	116400000	115560000	1400900000	1486500000	465190000	274490000	137900000
sp|P32386|YBT1_YEAST	YBT1	sp|P32386|YBT1_YEAST	40158000	200600000	85995000	55679000	47814000	39741000	46263000	190170000	70541000	43386000	41090000	38921000	36360000	183120000	141370000	76195000	53443000	35623000	56787000	191660000	89807000	86886000	43232000	47676000
sp|P32387|RM41_YEAST	RM41	sp|P32387|RM41_YEAST	0	90225000	4119700000	848360000	765690000	181340000	0	105420000	3969100000	1079600000	1101200000	380130000	0	135220000	1475700000	583920000	678300000	438700000	0	69668000	1418300000	387420000	657050000	433650000
sp|P32388|RM49_YEAST	RM49	sp|P32388|RM49_YEAST	38658000	49864000	666940000	189180000	120490000	71817000	37034000	48662000	418820000	537560000	338350000	113940000	0	51485000	199040000	122360000	399210000	101090000	0	49695000	128490000	139780000	280060000	89767000
sp|P32419|MDHP_YEAST	MDHP	sp|P32419|MDHP_YEAST	329990000	0	0	16849000	15402000	49312000	326630000	0	0	40425000	19668000	15978000	568790000	2269700	0	8276600	20014000	19918000	325880000	0	0	7570100	14830000	12075000
sp|P32445|RIM1_YEAST	RIM1	sp|P32445|RIM1_YEAST	281340000	1538800000	2878000000	291640000	118960000	39190000	217580000	992030000	1809500000	688280000	141710000	61842000	154350000	642610000	1424400000	554720000	105640000	55059000	163750000	614350000	585010000	389910000	144560000	50615000
sp|P32447|ASF1_YEAST	ASF1	sp|P32447|ASF1_YEAST	0	0	0	0	0	0	21298000	0	0	0	0	0	22879000	0	0	0	0	0	11039000	0	0	0	0	0
sp|P32449|AROG_YEAST	AROG	sp|P32449|AROG_YEAST	269780000	0	0	11447000	0	8097200	293140000	0	0	9857200	12879000	0	95819000	0	0	11593000	0	0	139430000	0	0	10967000	0	0
sp|P32453|ATP11_YEAST	ATP11	sp|P32453|ATP11_YEAST	93224000	26575000	0	0	0	0	84743000	29627000	0	0	0	0	43794000	0	0	0	0	0	35362000	0	0	0	0	0
sp|P32454|APE2_YEAST	APE2	sp|P32454|APE2_YEAST	980320000	20954000	37216000	16272000	8641300	15730000	777100000	106310000	13572000	23234000	24774000	11390000	739900000	36306000	50746000	48661000	5665000	7864600	803870000	28786000	28768000	30725000	14865000	6980800
sp|P32457|CDC3_YEAST	CDC3	sp|P32457|CDC3_YEAST	187580000	81045000	38130000	45808000	68515000	49618000	193570000	99164000	0	53012000	51866000	24065000	350310000	78142000	88448000	73119000	49100000	63852000	269280000	41748000	0	41800000	48756000	38200000
sp|P32458|CDC11_YEAST	CDC11	sp|P32458|CDC11_YEAST	20110000	19230000	14812000	0	0	0	25493000	19464000	0	0	0	0	42112000	0	0	0	0	0	38861000	0	0	0	0	0
sp|P32462|ERG24_YEAST	ERG24	sp|P32462|ERG24_YEAST	0	0	0	0	0	0	0	0	0	0	0	0	0	0	0	0	0	0	0	0	0	0	0	29561000
sp|P32468|CDC12_YEAST	CDC12	sp|P32468|CDC12_YEAST	282530000	171970000	37526000	84765000	45979000	27882000	188890000	205050000	414170000	76973000	61254000	0	575520000	200870000	105240000	129690000	132090000	83620000	412320000	128150000	59607000	62883000	64284000	106060000
sp|P32471|EF1B_YEAST	EF1B	sp|P32471|EF1B_YEAST	465760000	60371000	121950000	30432000	46653000	0	570680000	88302000	80129000	48888000	27948000	48923000	99469000	75954000	47388000	26180000	0	0	496820000	21041000	59272000	38872000	0	0
sp|P32473|ODPB_YEAST	ODPB	sp|P32473|ODPB_YEAST	804260000	1072500000	12249000000	3759800000	790140000	299930000	696300000	2263900000	5828900000	6300300000	1045900000	483500000	821240000	1137300000	6644800000	2404500000	643280000	282290000	788870000	1840900000	10915000000	3054800000	568150000	381120000
sp|P32474|EUG1_YEAST	EUG1	sp|P32474|EUG1_YEAST	19548000	0	0	0	0	0	14059000	0	0	0	0	0	32240000	0	0	0	0	0	32133000	0	0	0	0	0
sp|P32476|ERG1_YEAST	ERG1	sp|P32476|ERG1_YEAST	21355000	15796000	0	0	0	0	28397000	22645000	0	0	0	0	17846000	15342000	0	0	0	0	0	0	0	0	0	0
sp|P32479|HIR1_YEAST	HIR1	sp|P32479|HIR1_YEAST	0	0	0	38419000	0	0	0	0	0	54382000	35466000	0	0	0	27227000	32256000	0	0	0	0	0	28588000	27101000	0
sp|P32480|HIR2_YEAST	HIR2	sp|P32480|HIR2_YEAST	0	53078000	100850000	78968000	32301000	18397000	0	69671000	53712000	162340000	61470000	16651000	0	34067000	153960000	89536000	38098000	0	0	37133000	66063000	82108000	50436000	27278000
sp|P32481|IF2G_YEAST	IF2G	sp|P32481|IF2G_YEAST	343330000	132230000	70360000	38216000	45472000	38409000	369440000	173540000	56301000	88132000	34262000	59894000	285310000	156160000	69122000	88787000	46315000	38350000	279080000	129880000	60753000	43325000	45835000	36866000
sp|P32485|HOG1_YEAST	HOG1	sp|P32485|HOG1_YEAST	112250000	22683000	0	0	0	0	77618000	0	0	0	0	0	57359000	0	0	0	0	0	51411000	0	0	0	0	0
sp|P32486|KRE6_YEAST;sp|P33336|SKN1_YEAST	KRE6	sp|P32486|KRE6_YEAST	13207000	40888000	0	0	0	0	10642000	22216000	0	0	0	0	13531000	25193000	0	0	0	0	13093000	0	0	0	0	0
sp|P32495|NHP2_YEAST	NHP2	sp|P32495|NHP2_YEAST	14801000	77205000	525090000	338010000	309070000	289680000	10876000	118380000	153550000	378540000	469550000	377690000	0	0	266320000	311750000	211590000	211740000	0	95369000	116150000	226350000	302570000	193810000
sp|P32496|RPN12_YEAST	RPN12	sp|P32496|RPN12_YEAST	287340000	42752000	34448000	12033000	0	16037000	287750000	30747000	0	18640000	0	0	184680000	93894000	0	0	0	0	167280000	36471000	52548000	0	12032000	0
sp|P32497|EIF3C_YEAST	EIF3C	sp|P32497|EIF3C_YEAST	125980000	18441000	25959000	11120000	0	10827000	99052000	19555000	0	14566000	0	22502000	48915000	6780900	0	0	15887000	19168000	147490000	22823000	24438000	27721000	17484000	22480000
sp|P32500|NDC1_YEAST	NDC1	sp|P32500|NDC1_YEAST	0	21126000	47202000	44294000	53746000	59004000	16529000	29645000	0	35093000	47834000	0	0	24921000	41986000	66880000	123460000	107580000	0	0	47146000	59097000	84670000	63174000
sp|P32501|EI2BE_YEAST	EI2BE	sp|P32501|EI2BE_YEAST	0	0	0	0	0	0	0	0	0	0	0	0	28624000	0	0	0	0	0	23087000	0	0	0	0	0
sp|P32502|EI2BB_YEAST	EI2BB	sp|P32502|EI2BB_YEAST	0	0	0	0	0	0	0	0	0	0	0	0	0	0	0	0	0	0	0	1336400	0	0	0	0
sp|P32521|PAN1_YEAST	PAN1	sp|P32521|PAN1_YEAST	28131000	0	0	0	0	0	26592000	0	0	0	0	0	33166000	0	0	0	0	0	26009000	0	0	0	0	0
sp|P32522|PT309_YEAST	PT309	sp|P32522|PT309_YEAST	24949000	43798000	52018000	153940000	215650000	0	17462000	56987000	0	129590000	360860000	44278000	0	64146000	79740000	43075000	49319000	0	28954000	85490000	0	37571000	54964000	27995000
sp|P32523|PRP19_YEAST	PRP19	sp|P32523|PRP19_YEAST	11043000	19930000	19132000	0	0	0	7050500	28567000	0	0	0	0	13777000	29142000	0	0	0	0	12060000	29165000	0	0	0	0
sp|P32527|ZUO1_YEAST	ZUO1	sp|P32527|ZUO1_YEAST	248490000	25954000	30955000	11867000	6083700	9019200	300200000	23421000	0	12447000	0	0	508600000	18891000	20727000	8810500	8961600	0	383620000	17123000	0	9265900	0	0
sp|P32528|DUR1_YEAST	DUR1	sp|P32528|DUR1_YEAST	22314000	19190000	0	0	0	0	64786000	61132000	0	25742000	0	0	23929000	21764000	0	0	0	0	18590000	0	0	0	0	0
sp|P32558|SPT16_YEAST	SPT16	sp|P32558|SPT16_YEAST	64365000	0	0	0	0	0	39000000	0	0	0	0	0	64339000	18198000	0	27595000	0	0	122470000	14491000	0	0	0	0
sp|P32559|MSS1_YEAST	MSS1	sp|P32559|MSS1_YEAST	0	0	0	0	0	0	1598400	0	0	0	0	0	0	0	0	0	0	0	0	0	0	0	0	0
sp|P32561|RPD3_YEAST	RPD3	sp|P32561|RPD3_YEAST	27521000	34375000	0	0	14787000	0	18325000	29795000	0	0	0	0	25151000	29693000	30741000	21651000	18197000	0	21926000	14166000	0	0	0	0
sp|P32563|VPH1_YEAST	VPH1	sp|P32563|VPH1_YEAST	189860000	840490000	680290000	686270000	1626200000	5541400000	143990000	709850000	253630000	539340000	982000000	2579500000	259630000	1204600000	1146100000	1188800000	2757900000	5227000000	344610000	1290700000	1585900000	1439300000	3177700000	4395100000
sp|P32564|SCM4_YEAST	SCM4	sp|P32564|SCM4_YEAST	0	0	0	0	0	111140000	0	0	0	0	72999000	88039000	0	0	0	0	132320000	0	26692000	0	0	0	65715000	0
sp|P32565|RPN2_YEAST	RPN2	sp|P32565|RPN2_YEAST	571020000	1618100000	358890000	189570000	69597000	71962000	349850000	950810000	208470000	166400000	158590000	93094000	507360000	1798700000	887870000	290970000	80434000	78269000	425030000	2222200000	1007800000	354600000	88052000	60990000
sp|P32566|SMI1_YEAST	SMI1	sp|P32566|SMI1_YEAST	0	0	0	0	0	0	0	0	0	0	0	0	0	0	0	0	0	0	3539400	0	0	0	0	0
sp|P32568|SNQ2_YEAST	SNQ2	sp|P32568|SNQ2_YEAST	0	0	0	0	0	0	0	0	0	0	0	0	0	0	0	27212000	29266000	72399000	0	0	0	0	0	0
sp|P32573|SPS19_YEAST	SPS19	sp|P32573|SPS19_YEAST	19148000	0	0	9028300	26759000	150150000	0	0	0	0	28249000	95906000	0	0	0	0	14647000	74567000	0	0	0	11304000	16716000	35540000
sp|P32579|SUA5_YEAST	SUA5	sp|P32579|SUA5_YEAST	20737000	0	0	0	0	0	17842000	0	0	0	0	0	0	0	0	0	0	0	14501000	0	0	0	0	0
sp|P32580|SUV3_YEAST	SUV3	sp|P32580|SUV3_YEAST	0	0	0	0	0	0	0	0	0	0	0	0	0	0	17113000	0	0	0	0	0	0	0	0	0
sp|P32581|IME2_YEAST;sp|P23293|BUR1_YEAST	IME2	sp|P32581|IME2_YEAST	143310000	73283000	214010000	0	85888000	147570000	55922000	96814000	206660000	0	0	125190000	133290000	165420000	127100000	126330000	126680000	123080000	106400000	109590000	207460000	0	92543000	142840000
sp|P32582|CBS_YEAST	CBS	sp|P32582|CBS_YEAST	1274700000	88020000	18845000	22253000	2934200	4372800	1728100000	123670000	6895500	27579000	18370000	19604000	1579200000	121450000	29541000	52449000	4188400	1689800	1767700000	86190000	29438000	25350000	9412100	3638900
sp|P32585|MED18_YEAST	MED18	sp|P32585|MED18_YEAST	0	0	0	0	0	0	0	0	0	0	0	0	0	0	0	0	0	0	4960900	0	0	0	0	0
sp|P32588|PUB1_YEAST	PUB1	sp|P32588|PUB1_YEAST	95638000	0	0	0	0	0	130860000	0	0	4095300	0	0	83150000	0	0	0	0	0	89277000	0	0	16184000	0	0
sp|P32589|HSP7F_YEAST	HSP7F	sp|P32589|HSP7F_YEAST	1446500000	111820000	75357000	131580000	67681000	116840000	1433800000	335240000	96519000	218380000	161380000	55454000	1927400000	366300000	118870000	185170000	71783000	79491000	1759500000	242170000	84026000	145240000	75459000	43379000
sp|P32590|HSP79_YEAST	HSP79	sp|P32590|HSP79_YEAST	325440000	47358000	8188000	10893000	4467100	8212300	426200000	132870000	14591000	19167000	5388200	9775500	654790000	58821000	0	19218000	0	0	479120000	23730000	0	3102500	12089000	13063000
sp|P32598|PP12_YEAST	PP12	sp|P32598|PP12_YEAST	123560000	55568000	0	89691000	91978000	97141000	147700000	119860000	0	89572000	86321000	69182000	235420000	138650000	77587000	111910000	81855000	85511000	219680000	108910000	131020000	102690000	70267000	0
sp|P32599|FIMB_YEAST	FIMB	sp|P32599|FIMB_YEAST	278680000	10295000	16254000	11652000	0	0	396230000	0	0	0	0	8383700	160300000	76545000	29791000	22511000	12032000	5626700	333100000	27373000	0	9747500	12664000	0
sp|P32602|SEC17_YEAST	SEC17	sp|P32602|SEC17_YEAST	123440000	163290000	50076000	39826000	26244000	57997000	108250000	134990000	92016000	47044000	58085000	108050000	140590000	94144000	55554000	24039000	36030000	33409000	153320000	114110000	41680000	27106000	32642000	0
sp|P32604|F26_YEAST	F26	sp|P32604|F26_YEAST	14020000	0	0	0	0	0	0	0	0	0	0	0	0	0	0	0	0	0	0	0	0	0	0	0
sp|P32606|PT127_YEAST;sp|P14736|RAD4_YEAST	PT127	sp|P32606|PT127_YEAST	0	99178000	93221000	80175000	91665000	69143000	0	97818000	40626000	91459000	112100000	86159000	0	58380000	58616000	46015000	43009000	35390000	0	37448000	0	52539000	55836000	55742000
sp|P32608|RTG2_YEAST	RTG2	sp|P32608|RTG2_YEAST	23185000	0	0	0	0	0	0	24864000	0	0	0	0	27059000	0	18371000	0	0	0	23785000	0	0	13188000	0	0
sp|P32610|VATD_YEAST	VATD	sp|P32610|VATD_YEAST	54245000	55446000	19417000	17511000	51927000	185920000	72947000	0	0	0	62772000	102480000	59711000	82502000	66635000	57919000	114470000	166130000	0	0	58773000	74498000	146520000	157420000
sp|P32611|RML2_YEAST	RML2	sp|P32611|RML2_YEAST	0	34347000	5821100000	987810000	955710000	225170000	0	61202000	5876600000	1331000000	1423500000	424270000	0	57013000	1873000000	619550000	709440000	432090000	0	72604000	1869400000	522780000	852570000	567720000
sp|P32614|FRDS_YEAST	FRDS	sp|P32614|FRDS_YEAST	117610000	0	0	0	0	0	116720000	25336000	0	7381900	14363000	0	47261000	0	0	0	0	0	25957000	0	0	0	0	0
sp|P32621|GDA1_YEAST	GDA1	sp|P32621|GDA1_YEAST	29802000	0	0	0	0	34628000	0	0	0	0	0	0	32557000	0	0	0	0	27163000	31700000	0	0	0	0	0
sp|P32623|CRH2_YEAST	CRH2	sp|P32623|CRH2_YEAST	0	0	0	51488000	125400000	122450000	0	0	0	51458000	129750000	185650000	0	0	35793000	0	0	126550000	3949800	0	0	46999000	122270000	143560000
sp|P32628|RAD23_YEAST	RAD23	sp|P32628|RAD23_YEAST	0	0	0	0	0	0	0	0	0	0	0	0	0	0	0	0	0	0	4496300	0	0	0	0	0
sp|P32629|ANP1_YEAST	ANP1	sp|P32629|ANP1_YEAST	18615000	76679000	51845000	45300000	101440000	166330000	0	46598000	0	34421000	72710000	98568000	0	41969000	0	65041000	178610000	168330000	0	44948000	61077000	87608000	200500000	73378000
sp|P32642|GLRX4_YEAST	GLRX4	sp|P32642|GLRX4_YEAST	0	0	0	0	0	0	6484400	0	0	0	0	0	0	0	0	0	0	0	0	0	0	0	0	0
sp|P32644|ECM32_YEAST	ECM32	sp|P32644|ECM32_YEAST	0	0	0	28157000	23636000	0	0	0	0	31139000	41430000	23813000	0	0	0	18096000	0	0	0	0	0	20501000	20610000	0
sp|P32660|ATC5_YEAST;sp|Q12675|ATC4_YEAST	ATC5	sp|P32660|ATC5_YEAST	0	22956000	0	0	0	0	0	24184000	0	0	0	0	0	15634000	0	0	0	0	0	0	0	0	0	0
sp|P32771|FADH_YEAST	FADH	sp|P32771|FADH_YEAST	209440000	27838000	18847000	19248000	0	0	204510000	21767000	0	0	0	0	259330000	22496000	20184000	0	0	0	236460000	0	21042000	11774000	7962600	0
sp|P32774|T2AG_YEAST	T2AG	sp|P32774|T2AG_YEAST	0	0	0	0	0	0	2189700	0	0	0	0	0	0	0	0	0	0	0	7111400	0	0	0	0	0
sp|P32775|GLGB_YEAST	GLGB	sp|P32775|GLGB_YEAST	87654000	393150000	70086000	39189000	29668000	33132000	70938000	570180000	79999000	32963000	21937000	0	134380000	445530000	262300000	61905000	43887000	31499000	92537000	283370000	79319000	45525000	48994000	35350000
sp|P32787|MG101_YEAST	MG101	sp|P32787|MG101_YEAST	70822000	484120000	620300000	842530000	258350000	20224000	26367000	385860000	213490000	1241600000	896990000	77746000	45403000	325270000	704600000	850860000	138520000	7343300	34350000	333500000	409580000	881260000	235800000	32227000
sp|P32790|SLA1_YEAST	SLA1	sp|P32790|SLA1_YEAST	24776000	0	0	0	0	0	18838000	0	0	0	0	0	18944000	0	0	0	0	0	19916000	0	0	0	0	0
sp|P32792|YHH7_YEAST	YHH7	sp|P32792|YHH7_YEAST	7143900	0	0	0	0	0	9097600	0	0	0	0	0	0	0	0	0	0	0	9708000	0	0	0	0	0
sp|P32793|YSC84_YEAST	YSC84	sp|P32793|YSC84_YEAST	43261000	0	0	0	0	0	32272000	0	0	0	0	0	28371000	0	0	0	0	0	17589000	0	0	0	0	0
sp|P32795|YME1_YEAST	YME1	sp|P32795|YME1_YEAST	133460000	573620000	405270000	142160000	174670000	210880000	132700000	481720000	380270000	127110000	172950000	220880000	150240000	327180000	218550000	104050000	131700000	125820000	159070000	385500000	239980000	120960000	119440000	122540000
sp|P32796-2|CACP_YEAST;sp|P32796|CACP_YEAST	CACP	sp|P32796-2|CACP_YEAST;sp|P32796|CACP_YEAST	1495100000	2110300000	542990000	267590000	221530000	145290000	1293000000	2600300000	463130000	293900000	236850000	247090000	2631000000	2806700000	1027600000	532690000	312030000	348670000	2473200000	2470100000	835900000	530530000	355820000	378060000
sp|P32799|COX13_YEAST	COX13	sp|P32799|COX13_YEAST	21411000	93872000	56117000	320900000	742940000	1420100000	14102000	63728000	0	142260000	402540000	691350000	0	68465000	79985000	1156700000	2425100000	1939200000	57811000	229120000	171220000	1260500000	2889200000	1458600000
sp|P32803|EMP24_YEAST	EMP24	sp|P32803|EMP24_YEAST	145980000	346070000	297360000	238430000	368920000	504880000	70945000	341060000	244040000	180340000	287850000	573260000	165450000	282520000	250290000	281950000	605050000	486060000	162090000	351040000	295340000	282530000	544060000	469820000
sp|P32832|RSC7_YEAST	RSC7	sp|P32832|RSC7_YEAST	15484000	0	0	0	0	0	15141000	0	0	0	0	0	18628000	0	0	0	0	0	15977000	0	0	0	0	0
sp|P32835|GSP1_YEAST	GSP1	sp|P32835|GSP1_YEAST	0	0	0	0	0	0	0	0	0	0	0	0	0	0	0	0	0	0	0	0	0	0	0	8214400
sp|P32836|GSP2_YEAST	GSP2	sp|P32836|GSP2_YEAST	76684000	128510000	155710000	75131000	66353000	70577000	114110000	91569000	0	59131000	71897000	107090000	64679000	128880000	135010000	83252000	66179000	80981000	94300000	131440000	112220000	90865000	85305000	74826000
sp|P32839|BCS1_YEAST	BCS1	sp|P32839|BCS1_YEAST	25419000	0	0	0	0	0	0	0	0	0	0	0	0	0	0	0	0	0	0	0	0	0	0	0
sp|P32842|VATL2_YEAST	VATL2	sp|P32842|VATL2_YEAST	0	0	0	0	0	0	0	0	0	0	0	0	0	0	0	0	0	0	0	0	0	0	0	28631000
sp|P32843|YME2_YEAST	YME2	sp|P32843|YME2_YEAST	60995000	100700000	117990000	84450000	0	78701000	83389000	83452000	0	49332000	73508000	66119000	0	81729000	63827000	51401000	37938000	68455000	29353000	91559000	100890000	55546000	86896000	71641000
sp|P32857|PTM1_YEAST	PTM1	sp|P32857|PTM1_YEAST	0	0	0	28624000	36299000	134660000	0	0	0	0	79791000	53391000	0	0	0	0	171590000	252590000	0	0	0	58249000	142800000	140130000
sp|P32860|NFU1_YEAST	NFU1	sp|P32860|NFU1_YEAST	102160000	0	0	0	0	0	216080000	0	0	0	0	0	114160000	0	0	0	0	0	107660000	30367000	0	0	0	0
sp|P32861|UGPA1_YEAST	UGPA1	sp|P32861|UGPA1_YEAST	1003800000	739260000	263280000	283610000	240790000	148900000	954850000	775770000	356280000	310730000	313780000	137290000	1329600000	750120000	417290000	383640000	293420000	249690000	1167700000	540560000	285090000	370980000	246360000	241500000
sp|P32867|SSO1_YEAST	SSO1	sp|P32867|SSO1_YEAST	0	74679000	79275000	54463000	65662000	63458000	0	61291000	69048000	0	57323000	86723000	24836000	56359000	62264000	58246000	89065000	96417000	0	50108000	48370000	44390000	80140000	64343000
sp|P32875|LIPA_YEAST	LIPA	sp|P32875|LIPA_YEAST	0	0	0	0	0	0	16498000	0	0	0	0	0	24350000	0	0	0	0	0	0	0	0	0	0	0
sp|P32891|DLD1_YEAST	DLD1	sp|P32891|DLD1_YEAST	1059600000	1837400000	1441400000	1656300000	2532900000	3206000000	904310000	2116700000	1669200000	1490600000	2365300000	4251000000	961020000	803510000	828710000	1264800000	2834800000	2955600000	926380000	1046700000	1159800000	1521900000	2663800000	2386400000
sp|P32892|DRS1_YEAST	DRS1	sp|P32892|DRS1_YEAST	0	119800000	290990000	131040000	58394000	19577000	0	71615000	263660000	178310000	70156000	0	0	79793000	144300000	120400000	41957000	0	0	56500000	108770000	83173000	42159000	0
sp|P32895|KPR1_YEAST	KPR1	sp|P32895|KPR1_YEAST	33077000	0	0	23571000	35033000	23128000	25856000	23237000	0	29149000	23161000	0	0	27574000	0	60325000	30416000	28022000	31434000	0	0	46620000	42290000	0
sp|P32897|TIM23_YEAST	TIM23	sp|P32897|TIM23_YEAST	46494000	0	0	0	0	31667000	60934000	0	0	14074000	24804000	0	0	0	0	0	0	0	22956000	0	0	0	0	0
sp|P32898|CYM1_YEAST	CYM1	sp|P32898|CYM1_YEAST	52209000	0	0	0	0	0	54306000	0	0	0	0	0	35455000	0	0	0	0	0	33496000	0	0	0	0	0
sp|P32899|IMP3_YEAST	IMP3	sp|P32899|IMP3_YEAST	0	5771500	58386000	127960000	30009000	21139000	0	0	0	184500000	41424000	15522000	0	0	76654000	171600000	24402000	0	0	0	32649000	149950000	30995000	12140000
sp|P32902|RT04_YEAST	RT04	sp|P32902|RT04_YEAST	64635000	1536800000	490960000	657100000	1153400000	250700000	32276000	1292900000	304890000	653140000	1389300000	367850000	0	803780000	345610000	542080000	868820000	333770000	0	1188600000	193030000	514060000	1030800000	554930000
sp|P32904|RM06_YEAST	RM06	sp|P32904|RM06_YEAST	42602000	83861000	2718200000	332670000	348620000	93944000	0	21819000	1947500000	644400000	537920000	128690000	0	0	720880000	287070000	281630000	146800000	0	80680000	722660000	211090000	329710000	226380000
sp|P32905|RSSA1_YEAST	RSSA1	sp|P32905|RSSA1_YEAST	226990000	1930600000	1488900000	26493000000	20137000000	46306000000	134310000	2065800000	1269000000	26709000000	21378000000	37173000000	137440000	1980700000	1030600000	12343000000	16885000000	29463000000	96482000	3047500000	1079500000	14588000000	15950000000	29730000000
sp|P32906|MNS1_YEAST	MNS1	sp|P32906|MNS1_YEAST	0	0	0	0	0	0	0	0	0	0	0	0	0	0	0	0	0	0	6434300	0	0	0	0	0
sp|P32907|ATO2_YEAST	ATO2	sp|P32907|ATO2_YEAST	0	0	28068000	20806000	30272000	78022000	0	0	0	0	19693000	32604000	0	276380000	184200000	88704000	178460000	778930000	13780000	321870000	0	96409000	275710000	444660000
sp|P32908|SMC1_YEAST	SMC1	sp|P32908|SMC1_YEAST	92789000	49863000	39398000	0	0	0	84173000	81306000	0	0	19408000	0	121280000	34745000	0	27941000	0	0	97522000	53855000	0	18579000	20255000	0
sp|P32911|SUI1_YEAST	SUI1	sp|P32911|SUI1_YEAST	64754000	0	0	0	0	0	71022000	0	0	0	0	0	101870000	0	0	0	0	0	63098000	0	0	0	0	0
sp|P32914|SPT4_YEAST	SPT4	sp|P32914|SPT4_YEAST	0	0	0	0	0	0	0	0	0	0	0	0	0	0	0	0	0	0	6574300	0	0	0	0	0
sp|P32915|SC61A_YEAST	SC61A	sp|P32915|SC61A_YEAST	200680000	64883000	61360000	92954000	129330000	166960000	107310000	39050000	0	69808000	170580000	234680000	138570000	49589000	40949000	93084000	101310000	143070000	123970000	49569000	60799000	63632000	93401000	107560000
sp|P32916|SRPR_YEAST	SRPR	sp|P32916|SRPR_YEAST	0	0	0	0	0	0	0	0	0	0	0	0	0	0	0	0	0	8772300	0	0	0	0	0	0
sp|P32939|YPT7_YEAST	YPT7	sp|P32939|YPT7_YEAST	48023000	32998000	30060000	25223000	25466000	22622000	48443000	39195000	0	25791000	26268000	44488000	48475000	0	22114000	21686000	29415000	25020000	36541000	30446000	0	21287000	22815000	19556000
sp|P33201|MRT4_YEAST	MRT4	sp|P33201|MRT4_YEAST	0	0	331330000	910220000	601590000	696670000	0	0	313520000	1372300000	692360000	1032900000	0	102420000	448630000	955290000	563500000	745570000	0	113700000	494750000	1169100000	550410000	881900000
sp|P33204|ARPC4_YEAST	ARPC4	sp|P33204|ARPC4_YEAST	30884000	0	0	0	13297000	10163000	77061000	0	0	0	16463000	0	40035000	0	0	0	8934000	0	95218000	0	0	0	11814000	10070000
sp|P33297|PRS6A_YEAST	PRS6A	sp|P33297|PRS6A_YEAST	318760000	1063700000	323810000	157200000	116610000	106330000	368940000	907290000	294940000	156690000	134650000	98436000	346210000	1497900000	626280000	261160000	150330000	118260000	370490000	1797000000	777070000	319490000	170830000	118280000
sp|P33298|PRS6B_YEAST	PRS6B	sp|P33298|PRS6B_YEAST	291180000	539400000	195660000	135140000	155910000	110500000	260670000	530040000	321770000	163340000	144090000	132050000	304970000	806230000	312720000	199080000	128840000	134610000	229410000	921850000	534710000	225860000	128300000	105050000
sp|P33299|PRS7_YEAST	PRS7	sp|P33299|PRS7_YEAST	432610000	996740000	527420000	197990000	183230000	145140000	393800000	861800000	250140000	186320000	208120000	191790000	519760000	1513600000	726870000	304620000	188850000	159170000	424450000	1688500000	782990000	324340000	181170000	165370000
sp|P33303|SFC1_YEAST	SFC1	sp|P33303|SFC1_YEAST	632360000	1084900000	790520000	949380000	986750000	1152600000	453230000	920700000	680320000	719390000	1010300000	862150000	589890000	1036800000	780600000	1349500000	1111100000	876140000	594060000	1270600000	2068100000	1451000000	1238900000	828780000
sp|P33307|CSE1_YEAST	CSE1	sp|P33307|CSE1_YEAST	0	0	0	0	0	0	0	0	0	0	0	0	17356000	0	0	0	0	0	16302000	0	0	0	0	0
sp|P33309|DOM34_YEAST	DOM34	sp|P33309|DOM34_YEAST	0	0	0	0	0	0	16580000	0	0	0	0	0	13515000	0	0	0	0	0	0	0	0	0	0	0
sp|P33310|MDL1_YEAST	MDL1	sp|P33310|MDL1_YEAST	0	74252000	40302000	0	0	0	0	66178000	0	32366000	32303000	0	0	38078000	44871000	34527000	0	0	0	100150000	57553000	39736000	0	0
sp|P33311|MDL2_YEAST	MDL2	sp|P33311|MDL2_YEAST	0	19091000	19147000	0	0	0	13705000	17806000	0	0	0	0	0	28172000	0	0	0	0	0	20049000	0	12516000	14227000	0
sp|P33315|TKT2_YEAST	TKT2	sp|P33315|TKT2_YEAST	79140000	0	0	0	0	0	57349000	0	0	0	0	0	26489000	0	0	0	0	0	24669000	0	0	0	0	0
sp|P33317|DUT_YEAST	DUT	sp|P33317|DUT_YEAST	34533000	0	0	0	0	0	22390000	0	0	0	0	0	0	0	0	0	0	0	0	0	0	0	0	0
sp|P33322|CBF5_YEAST	CBF5	sp|P33322|CBF5_YEAST	27559000	642700000	882820000	1090900000	1454300000	929140000	15889000	720210000	492140000	1071100000	1532900000	1123900000	12207000	623220000	881130000	1012200000	884060000	762080000	19779000	623500000	513140000	1016100000	1213100000	949100000
sp|P33327|DHE2_YEAST	DHE2	sp|P33327|DHE2_YEAST	423830000	211300000	85958000	107030000	93510000	99234000	278980000	284970000	106570000	117980000	94333000	73627000	369520000	261080000	199400000	141170000	106700000	142060000	457210000	218970000	101360000	166270000	101710000	95151000
sp|P33328|SNC2_YEAST;sp|P31109|SNC1_YEAST	SNC2	sp|P33328|SNC2_YEAST;sp|P31109|SNC1_YEAST	0	0	0	35817000	39528000	0	0	0	0	0	31892000	0	0	0	0	0	0	0	0	0	0	25188000	40831000	0
sp|P33330|SERC_YEAST	SERC	sp|P33330|SERC_YEAST	250870000	7828800	0	6178400	2589500	3609600	392110000	0	0	5037500	3515300	6531100	338190000	3073700	0	5938700	4091500	2164300	445620000	1595800	0	2716400	6611200	0
sp|P33331|NTF2_YEAST	NTF2	sp|P33331|NTF2_YEAST	0	0	0	0	0	0	28031000	0	0	0	0	0	0	0	0	0	0	0	0	0	0	0	0	0
sp|P33333|PLSC_YEAST	PLSC	sp|P33333|PLSC_YEAST	78617000	228420000	118740000	117650000	119560000	92380000	72027000	187650000	84049000	99334000	119460000	114440000	0	137990000	98472000	90034000	58358000	85243000	40314000	143710000	106380000	75628000	64870000	68062000
sp|P33334|PRP8_YEAST	PRP8	sp|P33334|PRP8_YEAST	0	65591000	24132000	4951000	0	0	0	40072000	0	13580000	0	0	0	47498000	24560000	0	11876000	0	0	42234000	0	0	0	0
sp|P33338|SLA2_YEAST	SLA2	sp|P33338|SLA2_YEAST	73296000	20772000	0	0	0	0	53236000	0	0	27464000	0	0	54243000	20115000	0	25801000	0	0	144160000	0	0	0	0	0
sp|P33399|LHP1_YEAST	LHP1	sp|P33399|LHP1_YEAST	46459000	0	55006000	0	0	0	41830000	0	0	0	0	0	57674000	0	30969000	0	0	0	54560000	0	0	0	0	0
sp|P33401|PGM1_YEAST	PGM1	sp|P33401|PGM1_YEAST	10365000	0	0	0	0	0	9989800	0	0	0	0	0	11562000	0	0	0	0	0	11952000	0	0	0	0	0
sp|P33416|HSP78_YEAST	HSP78	sp|P33416|HSP78_YEAST	1000500000	11693000	7628400	9591200	3475100	7825400	587360000	7985700	0	7802400	6724300	3640200	279940000	6776100	0	4360900	5756100	0	342990000	0	11029000	2935700	6658700	0
sp|P33421|SDH3_YEAST	SDH3	sp|P33421|SDH3_YEAST	259920000	723920000	415670000	666880000	645520000	461280000	137740000	799610000	921650000	583160000	714860000	1063300000	0	422870000	409040000	350340000	440900000	392190000	0	423220000	425440000	373860000	518670000	366040000
sp|P33442|RS3A1_YEAST	RS3A1	sp|P33442|RS3A1_YEAST	80012000	4069900000	2170600000	34069000000	31209000000	48335000000	101520000	3307200000	2428300000	35908000000	30149000000	48659000000	85344000	3383800000	3037600000	18661000000	27599000000	42274000000	105030000	5626300000	2584600000	22120000000	24530000000	49789000000
sp|P33734|HIS5_YEAST	HIS5	sp|P33734|HIS5_YEAST	33249000	0	0	0	0	0	39819000	0	0	0	0	0	30746000	0	0	0	0	0	45819000	0	0	27435000	0	0
sp|P33750|DCA13_YEAST	DCA13	sp|P33750|DCA13_YEAST	34975000	25025000	270120000	557660000	123580000	30584000	17183000	15912000	111290000	629320000	133000000	25721000	0	0	403790000	704800000	91580000	0	0	0	46601000	378660000	107500000	33164000
sp|P33754|SEC66_YEAST	SEC66	sp|P33754|SEC66_YEAST	14134000	0	0	35733000	44827000	121430000	10968000	0	0	39818000	51305000	61596000	16038000	0	27994000	42063000	152720000	127410000	23255000	0	0	69278000	52131000	76870000
sp|P33755|NPL4_YEAST	NPL4	sp|P33755|NPL4_YEAST	0	0	0	0	0	0	25673000	0	0	0	0	0	27204000	0	0	0	0	0	20822000	0	0	0	0	0
sp|P33759|RT05_YEAST	RT05	sp|P33759|RT05_YEAST	0	2342700000	462290000	618150000	998090000	237770000	0	2095500000	389350000	624140000	1319200000	366730000	8239500	1735900000	340870000	453440000	735770000	355920000	0	1353400000	254270000	372920000	908910000	547490000
sp|P33767|OSTB_YEAST	OSTB	sp|P33767|OSTB_YEAST	59409000	353570000	239400000	187210000	192450000	259180000	36979000	222500000	125810000	140280000	218430000	372290000	70321000	260330000	216160000	169410000	255300000	271360000	69482000	315500000	227780000	165690000	177470000	206000000
sp|P33775|PMT1_YEAST	PMT1	sp|P33775|PMT1_YEAST	65342000	444700000	398680000	219650000	264930000	367220000	39623000	255190000	208170000	176870000	221390000	434100000	113910000	270160000	243410000	262330000	412070000	408680000	108790000	281300000	230630000	210410000	285130000	325010000
sp|P33892|GCN1_YEAST	GCN1	sp|P33892|GCN1_YEAST	67980000	62778000	38893000	26395000	26733000	0	36035000	34770000	0	18241000	0	32590000	65126000	70842000	26282000	24345000	0	11081000	78526000	79206000	26757000	23357000	22088000	23134000
sp|P33893|GATB_YEAST	GATB	sp|P33893|GATB_YEAST	42777000	0	0	0	0	0	0	0	0	0	0	0	0	0	0	0	0	0	38507000	0	0	0	0	0
sp|P34077|NIC96_YEAST	NIC96	sp|P34077|NIC96_YEAST	30214000	0	0	0	0	0	31694000	0	0	0	0	0	32584000	0	0	0	0	0	26989000	0	0	0	0	0
sp|P34087|RPB7_YEAST	RPB7	sp|P34087|RPB7_YEAST	0	0	0	0	0	0	0	0	0	0	0	0	0	0	0	13512000	0	0	0	0	0	0	0	0
sp|P34110|VPS35_YEAST	VPS35	sp|P34110|VPS35_YEAST	0	0	0	0	0	0	0	0	0	0	0	0	0	0	0	0	0	0	0	10269000	0	0	0	0
sp|P34160|NCBP1_YEAST	NCBP1	sp|P34160|NCBP1_YEAST	73725000	0	0	0	0	19467000	96050000	15114000	0	0	0	0	101180000	20903000	0	0	0	0	157830000	0	0	12397000	0	0
sp|P34163|TGL1_YEAST	TGL1	sp|P34163|TGL1_YEAST	0	194660000	0	202130000	194150000	0	0	271080000	0	0	0	0	0	131230000	0	138590000	0	0	0	343980000	0	256080000	0	0
sp|P34164|SIP2_YEAST	SIP2	sp|P34164|SIP2_YEAST	36660000	0	0	0	0	0	40364000	5460700	0	0	0	0	25460000	0	0	0	0	0	27616000	0	0	0	0	0
sp|P34167|IF4B_YEAST	IF4B	sp|P34167|IF4B_YEAST	45518000	0	0	0	0	0	67197000	0	0	0	0	0	24319000	0	0	0	0	0	34938000	0	0	0	0	0
sp|P34216|EDE1_YEAST	EDE1	sp|P34216|EDE1_YEAST	0	0	0	0	0	0	0	0	0	0	0	0	0	0	0	0	0	0	7571200	0	0	0	0	0
sp|P34221|PP2C3_YEAST	PP2C3	sp|P34221|PP2C3_YEAST	32447000	18698000	0	0	0	0	29779000	18457000	0	0	0	0	31949000	0	0	0	0	0	36505000	0	0	0	0	0
sp|P34222|PTH2_YEAST	PTH2	sp|P34222|PTH2_YEAST	0	0	0	0	0	0	0	59938000	0	0	0	0	0	0	0	0	0	0	0	0	0	0	0	0
sp|P34223|UBX1_YEAST	UBX1	sp|P34223|UBX1_YEAST	39138000	38075000	22745000	0	0	0	42238000	32853000	0	0	0	0	41113000	0	0	0	0	0	24695000	32531000	0	0	0	0
sp|P34227|PRX1_YEAST	PRX1	sp|P34227|PRX1_YEAST	945920000	110690000	62250000	15564000	19098000	48163000	1340200000	69285000	18314000	22416000	30399000	50654000	1006500000	96776000	23036000	22818000	14530000	0	895910000	93967000	19653000	17150000	12968000	16849000
sp|P34230|PXA2_YEAST	PXA2	sp|P34230|PXA2_YEAST	10854000	38996000	18758000	11820000	0	0	17005000	21899000	0	0	10821000	0	12783000	37495000	12205000	0	15096000	0	27761000	23232000	16973000	0	0	0
sp|P34237|CASP_YEAST	CASP	sp|P34237|CASP_YEAST	0	0	0	0	0	0	0	0	0	0	0	0	0	0	0	0	0	0	0	409150	0	0	0	0
sp|P34244|HSL1_YEAST	HSL1	sp|P34244|HSL1_YEAST	0	0	0	0	0	0	0	0	0	0	0	0	0	6307600	0	0	0	0	0	0	0	0	0	0
sp|P34247|UTP11_YEAST	UTP11	sp|P34247|UTP11_YEAST	0	0	103490000	257980000	121380000	0	0	0	0	254790000	127930000	0	0	0	102830000	224700000	52465000	0	0	0	47242000	287190000	79458000	0
sp|P34248|YKK0_YEAST	YKK0	sp|P34248|YKK0_YEAST	27531000	47486000	0	0	0	0	18562000	71593000	0	21192000	23186000	0	43909000	56397000	39490000	27417000	38459000	0	31187000	69603000	30039000	26671000	25147000	20551000
sp|P34251|YKK7_YEAST	YKK7	sp|P34251|YKK7_YEAST	0	0	0	0	0	0	0	0	0	0	0	0	0	0	0	0	0	0	0	1444400	0	0	0	0
sp|P34253|KTI12_YEAST	KTI12	sp|P34253|KTI12_YEAST	0	0	0	0	0	0	0	0	0	0	0	0	0	0	0	0	0	0	3316300	0	0	0	0	0
sp|P34730|BMH2_YEAST	BMH2	sp|P34730|BMH2_YEAST	3069700000	927740000	1097200000	336990000	191720000	287560000	3239900000	795300000	604950000	379350000	302370000	639910000	3468400000	892660000	555400000	302690000	161740000	227670000	2248700000	719670000	362870000	299610000	129380000	257690000
sp|P34760|TSA1_YEAST;sp|Q04120|TSA2_YEAST	TSA1	sp|P34760|TSA1_YEAST	752640000	1028000000	530060000	223730000	279820000	207220000	561910000	1397600000	570230000	232560000	285270000	373290000	843040000	982520000	677060000	304040000	285880000	253440000	692590000	682330000	704020000	242020000	244220000	160250000
sp|P35169|TOR1_YEAST	TOR1	sp|P35169|TOR1_YEAST	68368000	0	0	0	0	0	80187000	0	0	0	0	0	0	0	0	0	0	0	79260000	0	0	0	0	0
sp|P35172|TREB_YEAST	TREB	sp|P35172|TREB_YEAST	0	0	0	0	0	0	7051600	0	0	0	0	0	0	0	0	0	0	0	0	0	0	0	0	0
sp|P35178|RRP1_YEAST	RRP1	sp|P35178|RRP1_YEAST	0	18393000	242410000	207210000	49762000	20581000	0	18330000	121370000	175600000	67299000	0	0	25655000	245730000	181260000	33223000	14161000	15502000	25634000	81024000	142410000	38306000	0
sp|P35179|SC61G_YEAST	SC61G	sp|P35179|SC61G_YEAST	65368000	0	156950000	230710000	335840000	375490000	127440000	161730000	0	239340000	362860000	608500000	0	0	0	204540000	304690000	398140000	0	0	99965000	179430000	267190000	329460000
sp|P35180|TOM20_YEAST	TOM20	sp|P35180|TOM20_YEAST	0	0	0	0	0	0	14104000	0	0	36836000	0	0	0	0	0	0	0	0	0	0	0	0	0	0
sp|P35182|PP2C1_YEAST	PP2C1	sp|P35182|PP2C1_YEAST	0	0	0	0	0	0	0	0	0	0	0	0	0	0	0	0	0	0	6688000	0	0	0	0	0
sp|P35191|MDJ1_YEAST	MDJ1	sp|P35191|MDJ1_YEAST	188610000	537480000	288830000	215560000	176500000	126350000	252940000	421830000	266810000	210700000	203950000	159020000	119880000	251820000	202120000	117760000	90055000	61407000	118160000	310220000	159900000	114130000	99154000	62721000
sp|P35194|UTP20_YEAST	UTP20	sp|P35194|UTP20_YEAST	0	0	47128000	180630000	45978000	0	0	0	0	198660000	39498000	0	0	21846000	30819000	107240000	14496000	0	0	17716000	0	80493000	20274000	0
sp|P35197|GCS1_YEAST	GCS1	sp|P35197|GCS1_YEAST	0	0	0	0	0	0	40833000	0	0	0	0	0	0	0	0	0	0	0	0	0	0	0	0	0
sp|P35207|SKI2_YEAST	SKI2	sp|P35207|SKI2_YEAST	0	43449000	32967000	0	0	0	0	52841000	0	0	0	0	53121000	35811000	34000000	0	0	0	70472000	30229000	0	0	0	0
sp|P35691|TCTP_YEAST	TCTP	sp|P35691|TCTP_YEAST	1033300000	177610000	111440000	23602000	15814000	15879000	1012700000	151350000	51573000	33105000	36832000	32681000	1443800000	208170000	127000000	40074000	4353200	14971000	1349100000	183270000	58895000	37302000	11461000	1821800
sp|P35718|RPC8_YEAST	RPC8	sp|P35718|RPC8_YEAST	0	0	0	0	0	0	0	401980000	0	0	0	0	0	0	0	0	0	0	0	0	0	0	0	0
sp|P35719|MRP8_YEAST	MRP8	sp|P35719|MRP8_YEAST	604890000	8552200	4830600	3934300	1412200	2068900	554590000	5128700	0	2259400	0	3635500	823670000	5865900	0	1424900	0	0	827750000	3149700	0	2328500	0	0
sp|P35723|YET1_YEAST	YET1	sp|P35723|YET1_YEAST	29416000	0	0	135010000	193810000	177810000	16392000	0	0	161360000	191650000	162220000	0	0	95476000	224830000	349040000	250160000	0	0	0	157340000	202860000	172950000
sp|P35724|MNR2_YEAST	MNR2	sp|P35724|MNR2_YEAST	0	0	0	0	22789000	30724000	0	0	0	14909000	21389000	32522000	0	0	0	20353000	43693000	42617000	0	0	0	23964000	0	21461000
sp|P35729|NU120_YEAST	NU120	sp|P35729|NU120_YEAST	7267500	14878000	0	0	0	0	0	16125000	0	10092000	0	9299300	16156000	25837000	15038000	12270000	0	0	0	33429000	0	10987000	0	0
sp|P35732|DEF1_YEAST	DEF1	sp|P35732|DEF1_YEAST	0	0	0	0	0	0	0	0	0	0	0	0	0	0	0	0	0	0	0	0	0	0	0	0
sp|P35844|KES1_YEAST	KES1	sp|P35844|KES1_YEAST	182920000	16152000	0	0	0	13881000	225440000	23674000	0	0	9631400	0	168440000	0	9839500	0	0	0	157440000	0	0	7850700	0	0
sp|P35845|OSH1_YEAST	OSH1	sp|P35845|OSH1_YEAST	42641000	0	0	0	0	0	37407000	0	0	0	0	0	60486000	0	0	0	0	0	47942000	0	0	0	0	0
sp|P35996|RM38_YEAST	RM38	sp|P35996|RM38_YEAST	0	0	1903000000	505910000	588840000	143520000	0	0	2466700000	691260000	646150000	248120000	0	0	793660000	364070000	354400000	198720000	0	0	475050000	270060000	602150000	382540000
sp|P38711|RS27B_YEAST;sp|P35997|RS27_YEAST	RS27B	sp|P38711|RS27B_YEAST;sp|P35997|RS27_YEAST	0	1694200000	603240000	20119000000	17006000000	26504000000	24820000	2026800000	718810000	21342000000	19022000000	34909000000	0	1914800000	1253800000	7913900000	13058000000	22201000000	0	2102000000	639770000	11516000000	12991000000	29115000000
sp|P35999|PMIP_YEAST	PMIP	sp|P35999|PMIP_YEAST	10767000	0	0	0	0	0	11102000	0	0	0	0	0	0	0	0	0	0	0	10386000	0	0	0	0	0
sp|P36006|MYO3_YEAST	MYO3	sp|P36006|MYO3_YEAST	0	0	0	0	35640000	65615000	0	0	0	0	32495000	0	0	0	0	32938000	39394000	110500000	0	0	0	29177000	43307000	60391000
sp|P36008|EF1G2_YEAST	EF1G2	sp|P36008|EF1G2_YEAST	1086900000	268870000	81574000	85593000	59317000	70280000	1112500000	329540000	85336000	98320000	91536000	91395000	1300900000	277860000	178400000	86043000	27865000	56079000	1466000000	239530000	106120000	91034000	69362000	13097000
sp|P36010|NDK_YEAST	NDK	sp|P36010|NDK_YEAST	370740000	267970000	298810000	50718000	28060000	0	377880000	265640000	165380000	0	46183000	0	228860000	149620000	190350000	84884000	70054000	155740000	190720000	171610000	141720000	54965000	50903000	0
sp|P36013|MAOM_YEAST	MAOM	sp|P36013|MAOM_YEAST	110720000	25204000	0	11204000	0	0	183780000	26533000	0	13878000	13135000	0	61891000	0	16354000	0	0	0	141370000	0	0	9736000	0	0
sp|P36015|YKT6_YEAST	YKT6	sp|P36015|YKT6_YEAST	0	0	0	18354000	0	0	0	0	0	10880000	18515000	19802000	0	0	0	18715000	19627000	0	0	0	0	0	19680000	20810000
sp|P36016|LHS1_YEAST	LHS1	sp|P36016|LHS1_YEAST	71474000	0	0	0	0	0	68641000	0	0	0	0	0	102940000	0	0	0	0	0	82475000	0	0	0	0	0
sp|P36017|VPS21_YEAST	VPS21	sp|P36017|VPS21_YEAST	39124000	0	0	33629000	30721000	36524000	32446000	0	0	29882000	29710000	0	0	0	0	30441000	34923000	35310000	0	0	0	0	0	0
sp|P36018|YPT52_YEAST	YPT52	sp|P36018|YPT52_YEAST	0	0	0	0	0	0	21041000	0	0	0	0	0	24231000	0	0	0	0	0	19396000	0	0	0	0	0
sp|P36027|MID2_YEAST;sp|P53214|MTL1_YEAST	MID2	sp|P36027|MID2_YEAST;sp|P53214|MTL1_YEAST	0	0	0	0	0	0	0	0	0	0	0	0	0	0	23031000	0	0	0	0	0	0	0	0	0
sp|P36035|JEN1_YEAST	JEN1	sp|P36035|JEN1_YEAST	0	0	0	0	0	0	0	0	0	0	0	0	0	0	33621000	0	0	0	0	0	0	40378000	0	0
sp|P36036|YRA2_YEAST	YRA2	sp|P36036|YRA2_YEAST	19174000	0	0	0	0	0	0	8402300	0	0	0	0	0	0	0	0	0	0	21156000	0	0	0	0	0
sp|P36039|EMC3_YEAST	EMC3	sp|P36039|EMC3_YEAST	0	0	0	9986800	15906000	49658000	0	0	0	0	0	0	0	0	0	0	45321000	60303000	0	0	0	0	48770000	27740000
sp|P36040|POC2_YEAST	POC2	sp|P36040|POC2_YEAST	0	0	0	0	0	0	0	0	0	0	0	0	0	0	0	0	0	0	0	8836700	0	0	0	0
sp|P36046|MIA40_YEAST	MIA40	sp|P36046|MIA40_YEAST	29101000	499330000	408010000	99205000	75957000	162180000	28882000	379720000	78566000	0	95110000	86312000	0	37514000	37507000	42266000	0	0	38349000	148370000	0	0	0	0
sp|P36047|SDS22_YEAST	SDS22	sp|P36047|SDS22_YEAST	38637000	0	0	0	0	0	39301000	0	0	0	0	0	54430000	0	0	0	0	0	50079000	0	0	0	0	0
sp|P36048|SN114_YEAST	SN114	sp|P36048|SN114_YEAST	0	50398000	0	0	0	0	0	37708000	0	0	0	0	0	40386000	40603000	0	0	0	0	32788000	0	0	0	0
sp|P36049|EBP2_YEAST	EBP2	sp|P36049|EBP2_YEAST	0	0	913090000	274130000	105820000	54271000	0	0	411880000	311930000	122010000	0	0	69161000	777030000	258330000	89391000	0	0	71830000	349090000	232880000	84481000	0
sp|P36051|MCD4_YEAST	MCD4	sp|P36051|MCD4_YEAST	40470000	101620000	64875000	56315000	81242000	105060000	11746000	96991000	56136000	36720000	70664000	103820000	47514000	77911000	44152000	65338000	138060000	157900000	36693000	82842000	0	59235000	111200000	94285000
sp|P36056|RT22_YEAST	RT22	sp|P36056|RT22_YEAST	0	1151300000	111040000	12201000	0	0	0	1554800000	54474000	21958000	0	0	0	115220000	40160000	0	0	0	0	113070000	0	0	0	0
sp|P36059|NNRD_YEAST	NNRD	sp|P36059|NNRD_YEAST	55016000	40772000	74681000	45202000	58879000	67796000	50056000	33801000	0	33705000	60993000	93536000	104880000	70314000	60945000	47732000	57608000	94804000	110430000	69211000	68615000	66356000	87412000	88316000
sp|P36060|MCR1_YEAST	MCR1	sp|P36060|MCR1_YEAST	3117300000	561940000	614050000	292870000	342040000	372810000	2683900000	541180000	476610000	273580000	373550000	737750000	2009800000	452030000	262520000	179370000	205360000	275890000	1765600000	369090000	268830000	238820000	281890000	247030000
sp|P36062|AVT3_YEAST	AVT3	sp|P36062|AVT3_YEAST	0	0	0	0	0	0	0	0	0	0	0	0	0	0	0	0	0	0	0	8307300	0	0	0	0
sp|P36080|RRP14_YEAST	RRP14	sp|P36080|RRP14_YEAST	0	592680000	8054300000	907270000	1573100000	1376600000	0	0	1892100000	1049100000	713030000	0	0	648190000	6470200000	846290000	0	0	0	703800000	1583000000	2624100000	762030000	0
sp|P36081|YKH7_YEAST	YKH7	sp|P36081|YKH7_YEAST	0	45995000	0	55283000	58395000	109700000	0	58055000	0	0	39861000	0	18141000	54477000	34616000	56805000	91111000	85769000	29536000	113820000	98989000	63889000	80604000	80523000
sp|P36091|DCW1_YEAST	DCW1	sp|P36091|DCW1_YEAST	0	0	0	0	0	0	0	0	0	0	0	0	0	0	0	0	0	0	0	0	0	0	3785200	0
sp|P36095|VPS24_YEAST	VPS24	sp|P36095|VPS24_YEAST	24600000	0	123920000	128430000	48617000	0	0	0	83366000	132960000	74727000	0	0	0	83099000	102590000	75266000	0	0	0	79673000	124220000	77071000	0
sp|P36096|TUL1_YEAST	TUL1	sp|P36096|TUL1_YEAST	0	0	0	0	0	0	0	0	0	0	0	0	0	0	0	0	0	0	0	0	0	0	0	7874600
sp|P36101|YKC7_YEAST	YKC7	sp|P36101|YKC7_YEAST	0	0	0	18754000	19121000	30530000	0	16895000	0	13535000	15500000	0	0	0	0	17069000	26203000	30485000	0	0	0	14068000	19845000	17756000
sp|P36103|YKC3_YEAST	YKC3	sp|P36103|YKC3_YEAST	0	0	0	0	0	0	0	0	44428000	24462000	0	0	0	0	193860000	0	0	0	0	0	0	0	0	0
sp|P36108|DID4_YEAST	DID4	sp|P36108|DID4_YEAST	0	0	59443000	57096000	0	0	0	0	0	114370000	0	31793000	0	0	105460000	70592000	47054000	0	0	0	0	62033000	43046000	0
sp|P36112|FCJ1_YEAST	FCJ1	sp|P36112|FCJ1_YEAST	420200000	447100000	382320000	301700000	319790000	308820000	428120000	361410000	249530000	231040000	244710000	282470000	266020000	226640000	232060000	211540000	207670000	200090000	255680000	263760000	276160000	245820000	265780000	257860000
sp|P36114|YKR18_YEAST	YKR18	sp|P36114|YKR18_YEAST	83179000	0	0	0	0	0	85172000	29176000	0	0	0	0	65391000	0	0	0	0	0	49854000	0	0	33849000	0	0
sp|P36126|SPO14_YEAST	SPO14	sp|P36126|SPO14_YEAST	0	0	0	0	0	0	0	0	0	0	0	0	0	0	0	0	0	0	0	0	0	0	1792900	0
sp|P36132|KAE1_YEAST	KAE1	sp|P36132|KAE1_YEAST	0	0	0	0	0	0	8047700	0	0	0	0	0	0	0	0	0	0	0	0	0	0	0	0	0
sp|P36135|UTH1_YEAST	UTH1	sp|P36135|UTH1_YEAST	0	0	0	0	0	0	0	0	0	0	0	0	0	0	0	0	0	0	8218500	0	0	0	0	0
sp|P36136|SHB17_YEAST	SHB17	sp|P36136|SHB17_YEAST	128880000	12399000	0	0	0	0	91540000	0	0	0	22044000	0	103790000	0	0	24107000	0	0	96665000	0	0	0	0	0
sp|P36139|PET10_YEAST	PET10	sp|P36139|PET10_YEAST	157630000	86092000	134760000	240350000	230660000	186450000	254840000	68886000	0	177660000	224540000	284210000	134180000	138210000	171270000	240590000	198190000	136860000	228980000	121170000	184840000	282570000	251370000	208330000
sp|P36144|RL1D1_YEAST	RL1D1	sp|P36144|RL1D1_YEAST	0	19468000	52069000	99300000	0	0	0	0	39520000	122380000	0	0	0	36580000	104060000	125000000	0	0	0	0	0	91685000	0	36121000
sp|P36145|T2EB_YEAST	T2EB	sp|P36145|T2EB_YEAST	0	0	0	0	0	0	0	0	0	0	0	0	0	0	0	0	0	0	3967500	0	0	0	0	0
sp|P36147|PAM17_YEAST	PAM17	sp|P36147|PAM17_YEAST	57367000	0	0	0	41299000	0	52140000	0	0	0	0	40319000	45771000	0	0	0	0	0	40227000	0	0	0	0	0
sp|P36148|GPT2_YEAST	GPT2	sp|P36148|GPT2_YEAST	170830000	302690000	165550000	141700000	104010000	135300000	106000000	276210000	137310000	134850000	121490000	94351000	77002000	171050000	160820000	102510000	108880000	63967000	110150000	201430000	109450000	95340000	88113000	85079000
sp|P36149|BET3_YEAST	BET3	sp|P36149|BET3_YEAST	0	0	0	0	0	0	7304200	0	0	0	0	0	0	0	0	0	0	0	9026800	0	0	0	0	0
sp|P36151|YK50_YEAST	YK50	sp|P36151|YK50_YEAST	28836000	0	0	0	0	0	38230000	0	0	0	0	0	0	0	0	21090000	0	0	46535000	0	0	0	0	0
sp|P36152|DRE2_YEAST	DRE2	sp|P36152|DRE2_YEAST	0	0	0	0	0	0	0	0	0	0	0	0	0	0	0	0	0	0	7369300	0	0	0	0	0
sp|P36154|AIM29_YEAST	AIM29	sp|P36154|AIM29_YEAST	24113000	0	0	0	0	0	23899000	0	0	0	0	0	23940000	0	0	0	0	0	24603000	0	0	0	0	0
sp|P36159|RNZ_YEAST	RNZ	sp|P36159|RNZ_YEAST	962870000	2367400000	1051700000	0	0	0	0	2507300000	0	0	766930000	0	0	891300000	0	0	0	0	551460000	0	0	0	0	0
sp|P36160|RPF2_YEAST	RPF2	sp|P36160|RPF2_YEAST	0	174140000	587970000	216930000	92331000	46070000	0	145090000	401010000	267450000	110270000	51726000	0	200560000	528610000	258260000	75379000	23804000	0	220520000	453730000	262110000	105140000	41467000
sp|P36161|NU133_YEAST	NU133	sp|P36161|NU133_YEAST	8563300	0	0	0	0	0	0	0	0	0	0	0	0	0	0	0	0	0	0	0	0	0	0	0
sp|P36421|SYYC_YEAST	SYYC	sp|P36421|SYYC_YEAST	22556000	14207000	0	7568100	0	13578000	79381000	4125200	0	7206200	0	0	96912000	20318000	0	0	8598800	0	106820000	13299000	0	0	0	0
sp|P36516|RM03_YEAST	RM03	sp|P36516|RM03_YEAST	13611000	495310000	7858000000	1533000000	1303500000	212070000	18660000	452280000	9316500000	1753700000	1654000000	220520000	8265600	179040000	3619400000	737360000	765200000	277420000	9641100	176880000	2565400000	640030000	1397000000	529720000
sp|P36517|RM04_YEAST	RM04	sp|P36517|RM04_YEAST	4494400	209750000	4916100000	1382300000	822960000	199680000	0	161090000	4554000000	1613100000	1571100000	294150000	0	131330000	2011900000	555930000	684190000	352970000	0	117370000	1619700000	476560000	736830000	457180000
sp|P36519|RM07_YEAST	RM07	sp|P36519|RM07_YEAST	14426000	116590000	2078100000	411870000	427390000	119740000	0	86248000	2494000000	524350000	536230000	154880000	0	146250000	1166000000	277030000	349760000	222670000	0	115190000	765530000	289540000	415300000	290210000
sp|P36520|RM10_YEAST	RM10	sp|P36520|RM10_YEAST	0	95046000	6251800000	720270000	720250000	203650000	1881700	93825000	7559600000	1307900000	882660000	335490000	3358400	83450000	2728300000	359020000	551990000	271980000	19037000	78247000	2070700000	365980000	629630000	342590000
sp|P36521|RM11_YEAST	RM11	sp|P36521|RM11_YEAST	0	91099000	4354700000	721190000	803400000	168420000	0	79576000	3425900000	952380000	965880000	309180000	0	102080000	1193000000	402840000	478020000	236420000	0	54742000	609490000	295210000	612620000	352800000
sp|P36523|RM15_YEAST	RM15	sp|P36523|RM15_YEAST	0	37266000	2504000000	508460000	463320000	122720000	0	37705000	2013200000	664370000	603850000	175770000	0	29459000	379430000	326830000	338640000	124810000	0	21808000	657000000	274850000	405050000	232530000
sp|P36525|RM24_YEAST	RM24	sp|P36525|RM24_YEAST	0	51449000	5351900000	571460000	567130000	93826000	0	22564000	5562900000	871090000	700980000	191120000	0	15908000	2042000000	337530000	413460000	170410000	0	26568000	1323500000	274490000	530730000	283180000
sp|P36526|RM27_YEAST	RM27	sp|P36526|RM27_YEAST	0	73897000	373320000	182080000	198280000	58541000	0	141990000	870270000	218320000	178510000	78298000	0	0	386730000	101840000	153220000	96360000	0	0	0	122020000	212680000	125190000
sp|P36527|RM28_YEAST	RM28	sp|P36527|RM28_YEAST	0	0	1272300000	480200000	390400000	99591000	0	0	797520000	591670000	583650000	153920000	0	51994000	282940000	305800000	308720000	158940000	0	0	532130000	283390000	460900000	258730000
sp|P36528|RM17_YEAST	RM17	sp|P36528|RM17_YEAST	5812100	110870000	7409300000	1076500000	1096500000	184880000	3890800	112570000	7002400000	1568100000	1327900000	282250000	0	182840000	3576000000	658920000	712050000	239870000	5226200	171410000	2469900000	666360000	1069800000	621410000
sp|P36531|RM36_YEAST	RM36	sp|P36531|RM36_YEAST	0	0	1879300000	250980000	276190000	98112000	0	33872000	743280000	290970000	359880000	166350000	0	0	249800000	132980000	196510000	136230000	0	0	268360000	141450000	186720000	150620000
sp|P36532|RM37_YEAST	RM37	sp|P36532|RM37_YEAST	0	0	106830000	97306000	45199000	0	0	0	0	155570000	126170000	37835000	0	0	0	34677000	69226000	35978000	0	0	0	38281000	57967000	44159000
sp|P36533|RM39_YEAST	RM39	sp|P36533|RM39_YEAST	0	0	158210000	292660000	291710000	19485000	0	0	0	364140000	410700000	0	0	0	0	182080000	241780000	81402000	0	0	27360000	143780000	252140000	0
sp|P36534|RM40_YEAST	RM40	sp|P36534|RM40_YEAST	2889700	383590000	10860000000	1311100000	1154500000	248320000	0	294860000	11241000000	2110600000	1857600000	359540000	0	304510000	3627000000	691930000	807250000	407200000	0	266090000	2155400000	561340000	998660000	607330000
sp|P36775|LONM_YEAST	LONM	sp|P36775|LONM_YEAST	179840000	0	17556000	14289000	0	0	298480000	23820000	0	15520000	18372000	0	51107000	9027400	0	6939800	0	0	152320000	14735000	0	9151600	0	0
sp|P36973|APT2_YEAST	APT2	sp|P36973|APT2_YEAST	0	0	0	0	0	0	0	0	0	0	0	0	0	0	0	0	0	0	5845100	0	0	0	0	0
sp|P37012|PGM2_YEAST	PGM2	sp|P37012|PGM2_YEAST	866970000	280730000	162580000	102060000	83190000	64201000	749330000	238260000	63768000	121040000	138040000	71732000	835280000	333610000	316040000	182230000	96266000	62783000	745890000	273470000	110980000	149190000	91639000	98585000
sp|P37254|PABS_YEAST	PABS	sp|P37254|PABS_YEAST	27307000	0	0	0	0	0	27354000	0	0	0	0	0	0	0	0	0	0	0	17526000	0	0	0	0	0
sp|P37262|SOL2_YEAST	SOL2	sp|P37262|SOL2_YEAST	112980000	40813000	30014000	0	0	0	86611000	31157000	0	0	17578000	0	89499000	51011000	37312000	31516000	25274000	0	83589000	44964000	0	0	0	0
sp|P37267|CBP4_YEAST	CBP4	sp|P37267|CBP4_YEAST	0	0	0	0	55448000	0	0	0	0	0	0	0	0	0	0	0	0	0	0	0	0	0	0	0
sp|P37291|GLYC_YEAST	GLYC	sp|P37291|GLYC_YEAST	2416200000	772260000	600320000	405760000	401810000	249760000	2218200000	939070000	490150000	391340000	395260000	462310000	2654600000	692990000	568650000	413800000	286580000	239950000	2243000000	661810000	542680000	416840000	354930000	333140000
sp|P37292|GLYM_YEAST	GLYM	sp|P37292|GLYM_YEAST	132550000	64565000	40231000	0	0	0	88350000	43705000	0	0	0	0	107590000	60243000	0	27626000	0	0	56698000	19361000	30424000	16447000	17274000	0
sp|P37293|NAT2_YEAST	NAT2	sp|P37293|NAT2_YEAST	39652000	0	0	0	0	0	42739000	0	0	0	0	0	0	0	0	0	0	0	0	0	0	0	0	0
sp|P37296|STV1_YEAST	STV1	sp|P37296|STV1_YEAST	6686100	28267000	43240000	61454000	197960000	1371000000	7352900	23864000	0	42782000	100810000	284250000	10015000	11733000	33141000	75415000	252690000	528070000	10919000	39142000	25960000	120740000	431250000	378340000
sp|P37297|STT4_YEAST	STT4	sp|P37297|STT4_YEAST	0	0	0	0	0	0	0	0	0	0	0	0	0	0	0	0	0	0	0	0	0	1665500	0	0
sp|P37298|DHSD_YEAST	DHSD	sp|P37298|DHSD_YEAST	109390000	590680000	192830000	253070000	505290000	225770000	94464000	559080000	168400000	442520000	616350000	733900000	171450000	126070000	187100000	158350000	156130000	204630000	90839000	73179000	93588000	145980000	217120000	163120000
sp|P37299|QCR10_YEAST	QCR10	sp|P37299|QCR10_YEAST	232450000	668690000	248730000	486790000	606790000	786810000	204860000	406220000	295530000	426810000	571230000	1255600000	199970000	662030000	377010000	482650000	987460000	881780000	130210000	636630000	336390000	598770000	1072000000	841910000
sp|P37302|APE3_YEAST	APE3	sp|P37302|APE3_YEAST	190420000	35445000	29539000	17288000	15777000	0	535440000	29959000	41701000	23862000	0	11567000	539530000	100630000	0	32458000	6920800	0	800190000	143240000	21462000	24734000	0	9540800
sp|P37303|GLY1_YEAST	GLY1	sp|P37303|GLY1_YEAST	0	0	0	0	0	0	0	0	0	0	0	0	0	0	0	0	0	0	1446700	0	0	0	0	0
sp|P37838|NOP4_YEAST	NOP4	sp|P37838|NOP4_YEAST	21587000	104050000	146700000	249740000	82523000	30548000	19473000	65953000	155180000	292530000	162850000	25662000	18496000	87242000	168820000	344400000	81009000	25945000	0	33161000	107850000	236990000	115550000	43211000
sp|P37898|AAP1_YEAST	AAP1	sp|P37898|AAP1_YEAST	80922000	9251900	0	0	0	0	80344000	14891000	0	0	0	0	133510000	9615200	0	0	0	8723900	178080000	9794400	0	6174800	0	0
sp|P38009|PUR92_YEAST	PUR92	sp|P38009|PUR92_YEAST	1587200000	145660000	134510000	301910000	236170000	238090000	1579600000	366590000	35184000	366060000	320270000	246400000	1246300000	170330000	154710000	314370000	218510000	209330000	1487300000	223990000	213140000	348300000	240440000	218660000
sp|P38011|GBLP_YEAST	GBLP	sp|P38011|GBLP_YEAST	498200000	2584400000	1908500000	22316000000	17083000000	35564000000	343110000	3645300000	2361500000	27834000000	20787000000	24619000000	598390000	4543300000	2532500000	13228000000	17769000000	29680000000	677080000	5243400000	2125600000	15993000000	16459000000	33474000000
sp|P38013|AHP1_YEAST	AHP1	sp|P38013|AHP1_YEAST	248630000	30792000	0	31357000	45960000	55729000	278150000	0	46986000	57265000	52533000	19440000	93818000	0	0	15125000	16236000	0	169610000	18083000	0	17270000	15556000	16607000
sp|P38061|RL32_YEAST	RL32	sp|P38061|RL32_YEAST	0	79032000	3001200000	26662000000	17777000000	16338000000	2452100	47892000	1883500000	27231000000	19843000000	32519000000	0	65919000	2860700000	7460000000	15758000000	24776000000	0	165810000	1761100000	11515000000	15428000000	31933000000
sp|P38063|KPR4_YEAST	KPR4	sp|P38063|KPR4_YEAST	0	0	0	0	0	0	0	0	0	0	0	0	0	0	0	0	0	0	0	852240	0	0	0	0
sp|P38064|RM16_YEAST	RM16	sp|P38064|RM16_YEAST	0	19950000	2673900000	428080000	412370000	98776000	0	0	2369000000	552790000	552890000	159430000	0	40131000	1007400000	186290000	269020000	105930000	0	0	747240000	234190000	390010000	220760000
sp|P38067|UGA2_YEAST	UGA2	sp|P38067|UGA2_YEAST	125900000	29739000	24428000	8271500	0	4838400	96095000	66860000	0	19010000	7375400	0	182510000	30072000	20250000	17253000	0	0	106100000	22092000	0	9372600	0	0
sp|P38069|MNN2_YEAST	MNN2	sp|P38069|MNN2_YEAST	16539000	21869000	19522000	0	12786000	0	14056000	18216000	0	0	0	0	14332000	13401000	0	8518500	0	0	15740000	14249000	0	0	0	0
sp|P38071|ETR1_YEAST	ETR1	sp|P38071|ETR1_YEAST	607630000	53081000	38090000	45011000	62186000	52190000	615810000	73597000	44815000	69781000	56771000	32406000	658430000	77134000	41589000	30273000	27781000	17170000	366000000	41816000	40199000	36924000	31335000	0
sp|P38072|SCO2_YEAST	SCO2	sp|P38072|SCO2_YEAST	69243000	124280000	153370000	100900000	103200000	142880000	54945000	172680000	100210000	71509000	110420000	243580000	53969000	35944000	40921000	38113000	68778000	55358000	42316000	51965000	0	36531000	51119000	46700000
sp|P38074|HMT1_YEAST	HMT1	sp|P38074|HMT1_YEAST	61369000	25313000	0	0	0	0	48140000	24076000	0	0	0	0	34260000	0	0	0	0	0	35682000	0	0	0	0	0
sp|P38075|PDX3_YEAST	PDX3	sp|P38075|PDX3_YEAST	17072000	0	0	0	0	0	16435000	0	0	0	0	0	0	0	0	0	0	0	0	0	0	0	0	0
sp|P38077|ATPG_YEAST	ATPG	sp|P38077|ATPG_YEAST	724700000	1473300000	2254900000	1454500000	988550000	575620000	1016400000	1232600000	930130000	1116400000	991340000	820700000	1339700000	4818800000	1835400000	2784200000	2147900000	1196400000	990670000	3526100000	3641100000	3425100000	1892900000	1031200000
sp|P38079|YRO2_YEAST	YRO2	sp|P38079|YRO2_YEAST	0	0	0	0	0	0	0	0	0	0	0	0	0	0	0	0	0	0	0	0	0	0	0	150590000
sp|P38081|YBQ6_YEAST	YBQ6	sp|P38081|YBQ6_YEAST	132960000	42375000	0	11511000	22930000	0	99111000	35336000	0	0	0	0	72776000	0	0	0	0	0	92757000	0	0	0	0	0
sp|P38088-2|SYG_YEAST;sp|P38088|SYG_YEAST	SYG	sp|P38088-2|SYG_YEAST;sp|P38088|SYG_YEAST	1588300000	191200000	65138000	65149000	30435000	13647000	1509700000	216290000	24585000	81700000	29933000	26607000	1133600000	153840000	39375000	48691000	16701000	3903800	1189500000	91751000	6767200	27919000	11371000	10549000
sp|P38090|AGP2_YEAST	AGP2	sp|P38090|AGP2_YEAST	0	0	0	0	0	0	0	0	0	0	0	0	0	0	0	0	0	0	0	0	0	0	0	28921000
sp|P38109|YBY9_YEAST	YBY9	sp|P38109|YBY9_YEAST	0	0	0	0	0	0	0	0	0	0	0	0	101320000	0	0	0	0	0	63619000	0	0	0	0	0
sp|P38115|ARA1_YEAST	ARA1	sp|P38115|ARA1_YEAST	635390000	111670000	100990000	76124000	65653000	56558000	566830000	106840000	42322000	73637000	74155000	76850000	555380000	94163000	120410000	60138000	16244000	42293000	357590000	129730000	33073000	57198000	40269000	22789000
sp|P38116|ARL1_YEAST	ARL1	sp|P38116|ARL1_YEAST	0	0	0	0	0	0	0	0	0	0	0	0	20114000	0	0	0	0	0	0	0	0	0	0	0
sp|P38120|RT09_YEAST	RT09	sp|P38120|RT09_YEAST	17656000	1196400000	226690000	449240000	704920000	153510000	0	1073000000	268760000	435030000	980750000	222570000	0	784760000	229030000	364070000	629700000	274030000	0	832890000	139090000	307770000	709220000	353540000
sp|P38121|DPOA2_YEAST	DPOA2	sp|P38121|DPOA2_YEAST	12377000	0	0	0	0	0	12545000	0	0	0	0	0	0	0	0	0	0	0	10208000	0	0	0	0	0
sp|P38130|KTR3_YEAST	KTR3	sp|P38130|KTR3_YEAST	0	68368000	66244000	174000000	342410000	491270000	0	92683000	20485000	89063000	201590000	289180000	0	54477000	57576000	315440000	838920000	951830000	7224600	98406000	88322000	434920000	975100000	605510000
sp|P38131|KTR4_YEAST	KTR4	sp|P38131|KTR4_YEAST	12693000	0	0	0	0	8460100	12852000	11474000	0	0	0	0	14759000	0	0	0	0	0	13980000	0	0	0	0	0
sp|P38137|FAT2_YEAST	FAT2	sp|P38137|FAT2_YEAST	1062300000	80553000	114540000	138810000	212700000	260640000	1075700000	165320000	68297000	163430000	210100000	243810000	611820000	48273000	77820000	110010000	73371000	139380000	524690000	29797000	97237000	63915000	113640000	72179000
sp|P38139|LDH1_YEAST	LDH1	sp|P38139|LDH1_YEAST	0	0	0	0	0	0	0	0	0	0	0	0	0	0	0	0	0	0	7246100	0	0	0	0	0
sp|P38142|YB91_YEAST	YB91	sp|P38142|YB91_YEAST	0	0	0	0	0	0	0	0	0	0	0	0	0	0	0	32975000	0	0	0	0	0	29762000	27438000	0
sp|P38149|DUG2_YEAST	DUG2	sp|P38149|DUG2_YEAST	0	0	0	0	0	0	0	0	0	0	0	0	0	0	0	0	0	0	6981200	0	0	0	0	0
sp|P38151|PBP2_YEAST	PBP2	sp|P38151|PBP2_YEAST	0	0	0	0	0	0	0	0	0	0	0	0	0	0	0	0	3420700	0	0	0	0	0	0	0
sp|P38153|AP3M_YEAST	AP3M	sp|P38153|AP3M_YEAST	0	0	0	0	0	0	0	0	0	0	0	0	0	15175000	0	0	0	0	8312300	0	0	0	0	0
sp|P38166|SFT2_YEAST	SFT2	sp|P38166|SFT2_YEAST	0	0	0	0	0	0	14240000	0	0	0	0	0	0	0	0	0	0	0	14487000	0	0	0	0	0
sp|P38167|ECM21_YEAST	ECM21	sp|P38167|ECM21_YEAST	23799000	0	0	0	0	0	19059000	0	0	0	0	0	24326000	16051000	0	0	0	0	15276000	0	0	0	0	0
sp|P38169|KMO_YEAST	KMO	sp|P38169|KMO_YEAST	248370000	382460000	504220000	264390000	355100000	371440000	258710000	518390000	1936900000	291060000	342090000	575740000	562620000	549160000	2325000000	251640000	417070000	366350000	300030000	365500000	590070000	238110000	276590000	290540000
sp|P38172|YBJ5_YEAST	YBJ5	sp|P38172|YBJ5_YEAST	10520000	0	23726000	24619000	26595000	27610000	0	0	0	24748000	29170000	20671000	0	0	0	27686000	27771000	14620000	0	0	0	27797000	25422000	22323000
sp|P38174|MAP2_YEAST	MAP2	sp|P38174|MAP2_YEAST	0	0	0	0	0	0	0	0	0	0	0	0	0	0	0	0	0	0	0	0	0	5320400	0	0
sp|P38175|RT21_YEAST	RT21	sp|P38175|RT21_YEAST	0	45765000	101120000	246340000	474620000	72070000	0	91494000	60896000	264740000	578680000	94526000	0	353820000	114790000	185580000	267790000	133650000	0	311370000	35381000	145020000	378130000	205340000
sp|P38181|NU170_YEAST	NU170	sp|P38181|NU170_YEAST	0	0	0	0	0	0	0	0	0	0	0	0	0	0	0	0	0	0	0	0	0	0	0	1901700
sp|P38182|ATG8_YEAST	ATG8	sp|P38182|ATG8_YEAST	10368000	0	0	0	0	0	17407000	0	0	0	0	0	6211000	0	0	0	0	0	6851400	0	0	0	0	0
sp|P38191|MOH1_YEAST	MOH1	sp|P38191|MOH1_YEAST	0	0	0	0	0	0	0	0	0	0	0	0	0	0	0	0	0	0	0	0	0	0	12339000	0
sp|P38197|YBD6_YEAST	YBD6	sp|P38197|YBD6_YEAST	21872000	0	0	0	0	0	19898000	0	0	0	0	0	0	0	0	0	0	0	17501000	0	0	0	0	0
sp|P38199|HEK2_YEAST	HEK2	sp|P38199|HEK2_YEAST	31763000	0	0	0	0	0	32465000	0	0	0	0	0	37738000	0	0	0	0	0	0	0	0	0	0	0
sp|P38203|LSM2_YEAST	LSM2	sp|P38203|LSM2_YEAST	0	0	0	0	0	0	0	0	0	0	0	0	0	0	0	0	0	0	10256000	0	0	0	0	0
sp|P38205|NCL1_YEAST	NCL1	sp|P38205|NCL1_YEAST	90449000	0	0	0	0	0	82074000	29383000	0	0	0	0	116930000	30398000	20091000	0	0	0	105980000	0	0	0	0	0
sp|P38206|RFT1_YEAST	RFT1	sp|P38206|RFT1_YEAST	0	0	0	0	0	0	0	0	0	0	0	0	0	16350000	0	0	0	0	0	0	0	0	0	0
sp|P38212|RCR1_YEAST	RCR1	sp|P38212|RCR1_YEAST	0	0	0	0	29928000	0	0	0	0	0	0	0	0	0	0	25000000	50873000	55135000	38034000	0	0	0	62516000	42747000
sp|P38216|YBM6_YEAST	YBM6	sp|P38216|YBM6_YEAST	0	0	0	0	0	0	0	0	0	0	0	0	0	0	0	0	0	0	0	0	0	0	0	35309000
sp|P38217|IMB2_YEAST	IMB2	sp|P38217|IMB2_YEAST	0	0	0	0	0	0	0	0	0	0	0	0	0	0	0	0	0	0	0	17037000	0	0	0	0
sp|P38219|OLA1_YEAST	OLA1	sp|P38219|OLA1_YEAST	433610000	38708000	0	37713000	0	0	495580000	19174000	0	27163000	23796000	0	240640000	31724000	0	27282000	0	28851000	283740000	40685000	0	18621000	0	29612000
sp|P38221|CDS1_YEAST	CDS1	sp|P38221|CDS1_YEAST	3395000000	0	0	3764600000	3558100000	5219500000	0	0	0	3484600000	3480500000	4418300000	0	0	0	4965900000	4653000000	6434200000	0	0	0	2621600000	4116800000	5134400000
sp|P38225|FAT1_YEAST	FAT1	sp|P38225|FAT1_YEAST	20582000	0	0	0	0	0	17809000	14017000	0	0	0	0	26751000	0	0	0	0	0	18717000	0	0	0	0	0
sp|P38228|TCM62_YEAST	TCM62	sp|P38228|TCM62_YEAST	35465000	182590000	31692000	0	20296000	0	45212000	234730000	41533000	21604000	0	0	0	69978000	0	0	0	0	0	42493000	0	0	0	0
sp|P38230|QOR_YEAST	QOR	sp|P38230|QOR_YEAST	204130000	11347000	11803000	18319000	10627000	7993600	204270000	8384200	0	13337000	13495000	0	89103000	6833600	0	12673000	5615900	6519000	96227000	0	11039000	12467000	12169000	11416000
sp|P38234|RFS1_YEAST	RFS1	sp|P38234|RFS1_YEAST	0	0	0	0	25511000	0	17027000	0	0	0	0	0	20439000	0	0	13409000	0	0	19901000	0	0	24457000	0	0
sp|P38235|YBQ3_YEAST	YBQ3	sp|P38235|YBQ3_YEAST	24605000	0	0	0	0	0	25358000	0	0	0	0	0	31423000	0	0	0	0	0	0	0	0	0	0	0
sp|P38237|UBP14_YEAST	UBP14	sp|P38237|UBP14_YEAST	0	0	0	0	0	0	8657500	0	0	0	0	0	0	0	0	0	0	0	0	0	0	0	0	0
sp|P38239|YBR2_YEAST	YBR2	sp|P38239|YBR2_YEAST	26386000	0	0	0	0	0	22753000	0	0	0	0	0	25465000	0	0	0	0	0	15846000	0	0	0	0	0
sp|P38242|ALG14_YEAST	ALG14	sp|P38242|ALG14_YEAST	0	0	0	0	0	0	0	0	0	0	0	0	0	0	0	0	0	0	0	0	0	0	0	3474400
sp|P38247|SLM4_YEAST	SLM4	sp|P38247|SLM4_YEAST	10576000	0	0	0	0	0	0	0	0	0	0	0	0	0	0	0	0	0	7858100	0	0	0	0	0
sp|P38248|ECM33_YEAST	ECM33	sp|P38248|ECM33_YEAST	152550000	143350000	148190000	560750000	1241500000	1003700000	148010000	110090000	189620000	426690000	847810000	1010900000	199670000	260160000	257290000	630380000	1157100000	1495300000	341210000	197910000	147370000	708400000	1275900000	1361700000
sp|P38249|EIF3A_YEAST	EIF3A	sp|P38249|EIF3A_YEAST	457330000	128710000	19700000	27549000	21015000	32147000	453820000	180120000	107400000	61857000	27147000	17467000	314000000	140820000	47455000	41773000	26685000	29552000	497330000	138590000	44314000	65432000	39003000	48849000
sp|P38250|IST2_YEAST	IST2	sp|P38250|IST2_YEAST	0	0	0	0	0	0	0	56401000	0	0	0	0	0	62297000	44492000	50813000	59933000	0	0	81915000	0	0	0	0
sp|P38254|TTL_YEAST	TTL	sp|P38254|TTL_YEAST	135520000	21738000	0	0	0	0	142620000	25691000	0	0	0	0	169650000	20897000	0	0	0	0	139430000	24694000	0	0	0	0
sp|P38256|YBU6_YEAST	YBU6	sp|P38256|YBU6_YEAST	0	0	0	0	0	0	0	0	0	0	0	0	0	0	0	0	0	0	0	0	0	8298200	0	0
sp|P38260|FES1_YEAST	FES1	sp|P38260|FES1_YEAST	44026000	0	0	0	0	0	42447000	0	0	0	0	0	48340000	0	0	0	0	0	57396000	0	0	0	0	0
sp|P38264|PHO88_YEAST	PHO88	sp|P38264|PHO88_YEAST	19540000	20831000	43029000	867220000	1770500000	2275100000	85730000	14317000	0	472410000	1360100000	2495600000	26555000	18280000	0	665080000	2328300000	2595400000	20154000	0	27778000	888740000	2513700000	1715300000
sp|P38276|YBY7_YEAST	YBY7	sp|P38276|YBY7_YEAST	24876000	0	0	0	0	0	21204000	0	0	0	0	0	37557000	0	0	0	0	0	29432000	0	0	0	0	0
sp|P38281|APD1_YEAST	APD1	sp|P38281|APD1_YEAST	18673000	0	0	0	0	3631700	19028000	3029000	0	0	3128500	0	14739000	0	0	2845900	0	0	10174000	0	0	4854000	0	0
sp|P38286|MKAR_YEAST	MKAR	sp|P38286|MKAR_YEAST	27291000	50587000	26878000	38114000	33768000	36323000	16391000	65150000	0	31928000	40281000	55006000	0	54306000	0	35594000	31548000	40389000	0	35972000	43822000	33158000	29922000	34638000
sp|P38295|MCFS2_YEAST	MCFS2	sp|P38295|MCFS2_YEAST	116380000	28183000	0	18931000	25663000	17954000	112470000	17073000	0	29461000	21449000	21057000	82187000	0	0	21431000	0	0	75863000	10889000	0	11190000	0	0
sp|P38300|MBA1_YEAST	MBA1	sp|P38300|MBA1_YEAST	15450000	0	0	0	0	11325000	13737000	0	0	9175600	7938700	0	0	0	0	0	0	0	0	0	0	0	0	0
sp|P38310|FTH1_YEAST	FTH1	sp|P38310|FTH1_YEAST	27093000	28248000	0	0	0	0	28254000	31100000	0	0	0	0	42421000	27457000	30159000	0	0	0	34211000	34416000	34984000	0	0	0
sp|P38314|SDS24_YEAST	SDS24	sp|P38314|SDS24_YEAST	25959000	0	0	18101000	18765000	16782000	19243000	0	0	0	0	0	0	0	0	29151000	0	25588000	30007000	0	0	28994000	0	0
sp|P38325|OM14_YEAST	OM14	sp|P38325|OM14_YEAST	123000000	0	58445000	158920000	206540000	207270000	209620000	0	0	120970000	151530000	102590000	131240000	0	0	173830000	229010000	205910000	154080000	0	105250000	200770000	264210000	252800000
sp|P38328|ARPC1_YEAST	ARPC1	sp|P38328|ARPC1_YEAST	34690000	0	0	25808000	34431000	0	33223000	0	0	25104000	34727000	0	30244000	0	0	25393000	28065000	29639000	30891000	0	0	30907000	0	0
sp|P38333|ENP1_YEAST	ENP1	sp|P38333|ENP1_YEAST	8005100	57244000	88204000	462740000	67906000	0	0	42969000	0	419770000	119240000	0	0	0	113480000	590990000	41507000	0	0	0	23347000	301860000	73393000	0
sp|P38339|RGD1_YEAST	RGD1	sp|P38339|RGD1_YEAST	0	0	0	0	0	0	0	0	0	0	0	0	7688700	0	0	0	0	0	0	0	0	0	0	0
sp|P38341|AIM5_YEAST	AIM5	sp|P38341|AIM5_YEAST	37541000	50972000	50961000	0	0	0	41651000	36656000	36767000	0	0	0	38517000	51120000	43071000	31169000	0	0	33661000	39299000	0	25217000	0	0
sp|P38348|HSM3_YEAST	HSM3	sp|P38348|HSM3_YEAST	4598500	0	0	0	0	0	5610400	0	0	0	0	0	5119700	0	0	0	0	0	0	0	0	0	0	0
sp|P38352|SAF1_YEAST	SAF1	sp|P38352|SAF1_YEAST	46860000	0	42138000	0	0	0	35144000	0	0	0	0	0	64166000	0	0	0	0	0	47269000	0	0	0	0	0
sp|P38353|SSH1_YEAST	SSH1	sp|P38353|SSH1_YEAST	0	66303000	54119000	49881000	69412000	96231000	13580000	63099000	54424000	51093000	77454000	98872000	41126000	53674000	38233000	59082000	55848000	105020000	53044000	49103000	44831000	50263000	55704000	98540000
sp|P38354|YB8A_YEAST	YB8A	sp|P38354|YB8A_YEAST	0	0	0	0	0	0	0	0	0	0	0	0	0	0	0	0	0	0	0	0	0	5351800	0	0
sp|P38355|YB8B_YEAST	YB8B	sp|P38355|YB8B_YEAST	0	0	0	0	0	0	0	0	0	0	0	0	0	0	0	0	0	0	0	0	0	0	0	8050200
sp|P38426|TPS3_YEAST	TPS3	sp|P38426|TPS3_YEAST	18406000	0	0	0	0	0	16112000	19806000	0	0	0	0	44038000	20034000	31610000	19452000	0	15957000	44832000	22084000	26738000	20259000	0	0
sp|P38427|TSL1_YEAST	TSL1	sp|P38427|TSL1_YEAST	1903500000	1986600000	643910000	414970000	510240000	320230000	2236800000	2090000000	746480000	679000000	631610000	691260000	2883000000	1875700000	1694000000	719630000	494880000	429180000	3024800000	1497700000	853910000	1039100000	819870000	769270000
sp|P38431-2|IF5_YEAST;sp|P38431|IF5_YEAST	IF5	sp|P38431-2|IF5_YEAST;sp|P38431|IF5_YEAST	677240000	0	260010000	0	0	0	580430000	239490000	0	0	0	0	250040000	102550000	225880000	27018000	0	0	519390000	69383000	0	0	0	0
sp|P38439|LEO1_YEAST	LEO1	sp|P38439|LEO1_YEAST	0	0	0	0	0	0	52664000	0	0	0	0	0	0	0	0	0	0	0	0	0	0	0	0	0
sp|P38523|GRPE_YEAST	GRPE	sp|P38523|GRPE_YEAST	96958000	0	65211000	0	0	0	157090000	0	0	0	0	0	60002000	0	0	0	0	0	61788000	0	0	0	0	0
sp|P38555|YPT31_YEAST	YPT31	sp|P38555|YPT31_YEAST	0	0	0	26096000	0	0	30672000	0	0	0	26001000	0	0	0	0	20045000	20066000	20353000	49419000	0	0	0	30681000	25792000
sp|P38615|RIM11_YEAST	RIM11	sp|P38615|RIM11_YEAST	26525000	0	0	0	0	0	26047000	7600900	0	3950500	0	0	45273000	0	0	0	0	0	39419000	3653600	0	0	0	0
sp|P38616|YGP1_YEAST	YGP1	sp|P38616|YGP1_YEAST	277770000	431410000	101960000	33151000	9957500	8818700	310000000	510360000	64325000	45405000	13243000	12258000	172870000	403040000	49974000	12031000	0	4220500	191990000	303360000	41153000	10083000	0	0
sp|P38623|RCK2_YEAST	RCK2	sp|P38623|RCK2_YEAST	24268000	0	0	0	0	0	30759000	0	0	0	0	0	22360000	0	0	0	0	0	21436000	0	0	0	0	0
sp|P38624|PSB1_YEAST	PSB1	sp|P38624|PSB1_YEAST	131230000	458410000	80633000	68690000	33697000	12900000	93169000	498110000	67851000	69472000	33475000	26442000	116180000	433130000	139210000	72263000	25807000	81638000	90996000	313830000	63467000	53095000	22599000	20935000
sp|P38625|GUAA_YEAST	GUAA	sp|P38625|GUAA_YEAST	467070000	32977000	20555000	0	10319000	4990900	462960000	31041000	26692000	16259000	21734000	7695600	516100000	77039000	64376000	10082000	0	0	604430000	30913000	15890000	21735000	0	0
sp|P38626|NCB5R_YEAST	NCB5R	sp|P38626|NCB5R_YEAST	56879000	118970000	43337000	93578000	178030000	286140000	58684000	149790000	60225000	89488000	176620000	273370000	112880000	40466000	65432000	159890000	339620000	327410000	66092000	59873000	0	148610000	318150000	270850000
sp|P38627|URA8_YEAST	URA8	sp|P38627|URA8_YEAST	154230000	23898000	0	0	0	0	77565000	20817000	0	7360400	0	0	178290000	72744000	31742000	35832000	10055000	0	314740000	57571000	0	21329000	34694000	0
sp|P38628|AGM1_YEAST	AGM1	sp|P38628|AGM1_YEAST	9924300	0	0	0	0	0	11008000	0	0	0	0	0	18835000	14217000	0	0	0	0	14122000	11288000	0	0	0	0
sp|P38629|RFC3_YEAST	RFC3	sp|P38629|RFC3_YEAST	21792000	0	23408000	17232000	0	0	15277000	0	0	18100000	17159000	0	18108000	19803000	32969000	34135000	22669000	18141000	20619000	0	0	29156000	21178000	0
sp|P38631|FKS1_YEAST	FKS1	sp|P38631|FKS1_YEAST	25032000	71709000	0	26667000	27231000	57218000	0	50799000	0	28474000	36354000	39030000	0	44129000	24402000	0	27187000	0	26440000	71339000	0	27758000	24314000	0
sp|P38687|SRP68_YEAST	SRP68	sp|P38687|SRP68_YEAST	25050000	27813000	0	0	0	0	21893000	12935000	0	0	0	0	0	37512000	0	0	0	0	0	26468000	0	0	0	0
sp|P38688|SRP72_YEAST	SRP72	sp|P38688|SRP72_YEAST	0	0	0	0	0	0	0	0	0	0	0	0	0	0	0	0	0	0	0	0	0	1771800	0	0
sp|P38689|KPR3_YEAST	KPR3	sp|P38689|KPR3_YEAST	64960000	50321000	40824000	35300000	46887000	36533000	39721000	40090000	0	40196000	50898000	45121000	47787000	105660000	81802000	61490000	47319000	52629000	49769000	75139000	68295000	78182000	64482000	45188000
sp|P38690|YHJ3_YEAST	YHJ3	sp|P38690|YHJ3_YEAST	0	0	0	0	0	0	0	0	0	0	0	0	0	25344000	0	0	0	0	0	0	0	0	0	0
sp|P38694|MSC7_YEAST	MSC7	sp|P38694|MSC7_YEAST	51847000	80560000	50296000	38623000	43332000	31408000	60229000	32669000	0	0	32538000	0	46765000	66452000	0	42000000	49044000	0	59913000	70999000	54493000	45262000	46669000	30999000
sp|P38695|HXT5_YEAST;sp|P39004|HXT7_YEAST;sp|P39003|HXT6_YEAST;sp|P32465|HXT1_YEAST;sp|P32467|HXT4_YEAST;sp|P32466|HXT3_YEAST	HXT5	sp|P38695|HXT5_YEAST	32868000	279310000	160680000	135380000	173230000	439660000	0	272520000	266980000	99448000	124250000	307150000	39722000	395880000	313810000	201820000	229240000	565010000	78178000	671010000	333730000	341490000	422510000	851220000
sp|P38698|PPX1_YEAST	PPX1	sp|P38698|PPX1_YEAST	30122000	0	0	0	0	0	12241000	0	0	0	0	0	13492000	0	0	0	0	0	0	0	0	0	0	0
sp|P38701|RS20_YEAST	RS20	sp|P38701|RS20_YEAST	172230000	3452900000	1398800000	17984000000	18908000000	27585000000	162010000	3660000000	1231600000	19761000000	18158000000	35979000000	178770000	4543000000	1556800000	9875900000	14178000000	23109000000	136170000	4610300000	1248300000	11594000000	14134000000	27521000000
sp|P38703|LAG1_YEAST	LAG1	sp|P38703|LAG1_YEAST	0	36504000	18102000	9830100	0	13107000	0	38756000	18149000	0	14355000	0	11039000	31510000	15023000	0	13298000	0	0	0	0	12863000	0	0
sp|P38705|SYSM_YEAST	SYSM	sp|P38705|SYSM_YEAST	0	0	0	0	0	0	0	0	0	0	0	0	0	0	0	0	0	0	2959900	0	0	0	0	0
sp|P38707|SYNC_YEAST	SYNC	sp|P38707|SYNC_YEAST	618670000	105850000	106100000	107360000	90306000	71828000	492960000	149170000	0	111140000	110700000	109670000	699270000	317940000	187580000	172140000	118420000	90818000	709150000	249020000	191300000	147000000	112360000	70938000
sp|P38708|YHI0_YEAST	YHI0	sp|P38708|YHI0_YEAST	167950000	55774000	0	18397000	0	13396000	181720000	46045000	0	29633000	13300000	0	73618000	44895000	0	33091000	14988000	18397000	162790000	24445000	0	28021000	29750000	0
sp|P38714|SYRM_YEAST	SYRM	sp|P38714|SYRM_YEAST	0	0	0	0	0	0	14212000	0	0	0	0	0	0	0	0	0	0	0	0	0	0	0	0	0
sp|P38715|GRE3_YEAST	GRE3	sp|P38715|GRE3_YEAST	168200000	61637000	41274000	58271000	52674000	60399000	142630000	53389000	0	55454000	48931000	0	61446000	62688000	65774000	43062000	0	0	56429000	46158000	74180000	49323000	43001000	0
sp|P38717|SIP3_YEAST	SIP3	sp|P38717|SIP3_YEAST	0	0	0	0	0	0	0	0	0	0	0	0	0	0	0	0	0	0	0	12835000	0	0	0	0
sp|P38720|6PGD1_YEAST	6PGD1	sp|P38720|6PGD1_YEAST	836720000	207620000	82080000	50647000	38773000	40332000	769240000	127100000	26335000	82959000	64615000	44899000	1275400000	200410000	183520000	104330000	63300000	54382000	1254100000	203640000	51489000	81297000	46479000	71408000
sp|P38732|EFM1_YEAST	EFM1	sp|P38732|EFM1_YEAST	9187200	0	0	0	0	0	9852700	0	0	0	0	0	0	0	0	0	0	0	13289000	0	0	0	0	0
sp|P38737|ECM29_YEAST	ECM29	sp|P38737|ECM29_YEAST	50259000	0	0	0	0	0	55310000	101130000	0	0	0	0	63397000	30752000	0	0	0	0	47342000	27106000	0	0	0	0
sp|P38741|RIM4_YEAST	RIM4	sp|P38741|RIM4_YEAST	1394400000	992380000	1252800000	868440000	1113700000	755740000	1454200000	891840000	1085200000	867100000	1024300000	1120900000	1497500000	962500000	1243500000	1042300000	889900000	895490000	1152300000	928490000	909140000	820810000	846630000	806270000
sp|P38746|YLF2_YEAST	YLF2	sp|P38746|YLF2_YEAST	24572000	0	0	0	0	0	21477000	0	0	0	0	0	0	0	0	0	0	0	19399000	0	0	0	0	0
sp|P38747|OTU2_YEAST	OTU2	sp|P38747|OTU2_YEAST	0	0	0	0	0	0	0	0	0	0	0	0	0	0	0	0	0	0	0	0	0	0	0	30042000
sp|P38754|RL14B_YEAST;sp|P36105|RL14A_YEAST	RL14B	sp|P38754|RL14B_YEAST;sp|P36105|RL14A_YEAST	80016000	120780000	2137600000	21878000000	17754000000	33200000000	9401700	181950000	946700000	22147000000	19513000000	27504000000	24342000	289130000	1769000000	11153000000	14495000000	22362000000	24244000	242970000	2845400000	14898000000	14209000000	27782000000
sp|P38755|OSH7_YEAST	OSH7	sp|P38755|OSH7_YEAST	54600000	0	0	0	0	0	99161000	0	0	0	0	0	80784000	0	0	37168000	26697000	0	109770000	0	0	42631000	0	0
sp|P38758|TDA3_YEAST	TDA3	sp|P38758|TDA3_YEAST	111630000	0	5378700	4465500	4742600	0	111850000	11335000	0	4684500	0	0	140450000	9539800	5238100	12558000	0	4104200	123420000	9236500	7006600	8525200	0	5078300
sp|P38760|MIP6_YEAST	MIP6	sp|P38760|MIP6_YEAST	0	0	0	0	19001000	16523000	0	0	0	0	23595000	0	0	0	0	38528000	25463000	37340000	0	0	0	19972000	0	20544000
sp|P38764|RPN1_YEAST	RPN1	sp|P38764|RPN1_YEAST	745600000	1979900000	658940000	274710000	220590000	201150000	636340000	1421000000	612090000	258490000	241280000	223650000	793970000	2624800000	1137500000	442420000	235700000	271680000	592120000	2938400000	1444100000	482200000	288920000	161380000
sp|P38765|YHI9_YEAST	YHI9	sp|P38765|YHI9_YEAST	0	0	0	0	0	0	0	0	0	0	0	0	12033000	0	0	0	0	0	0	0	0	0	0	0
sp|P38768|PIH1_YEAST	PIH1	sp|P38768|PIH1_YEAST	14828000	0	0	0	0	0	18276000	0	0	0	0	0	16233000	8425700	0	0	0	0	15094000	0	0	0	0	0
sp|P38771|RRF1_YEAST	RRF1	sp|P38771|RRF1_YEAST	0	0	0	0	0	0	88066000	0	0	0	0	0	0	0	0	0	0	0	0	0	0	0	0	0
sp|P38777|FSH1_YEAST	FSH1	sp|P38777|FSH1_YEAST	0	0	0	0	0	0	0	0	0	0	0	0	0	0	0	0	0	0	4262800	0	0	0	0	0
sp|P38779|CIC1_YEAST	CIC1	sp|P38779|CIC1_YEAST	24773000	0	642800000	391530000	71299000	28198000	0	0	205530000	443680000	121420000	27968000	0	0	676640000	332860000	53656000	0	0	0	166080000	274770000	63747000	0
sp|P38783|FYV4_YEAST	FYV4	sp|P38783|FYV4_YEAST	0	26787000	0	0	0	0	0	43262000	53530000	0	0	0	0	17098000	0	26577000	19345000	0	0	17061000	0	0	0	0
sp|P38787|PANE_YEAST	PANE	sp|P38787|PANE_YEAST	48563000	32170000	22633000	0	0	0	64790000	22230000	0	0	0	0	57018000	30056000	0	0	0	0	48339000	22795000	0	0	0	0
sp|P38788|SSZ1_YEAST	SSZ1	sp|P38788|SSZ1_YEAST	782810000	93402000	48298000	66735000	28968000	35564000	881290000	151120000	7980500	86844000	45885000	23730000	1048800000	140640000	65303000	63737000	26794000	31032000	1144400000	105190000	17813000	83073000	25440000	23622000
sp|P38789|SSF1_YEAST	SSF1	sp|P38789|SSF1_YEAST	0	0	0	0	0	0	0	0	0	0	0	0	0	0	75297000	0	0	0	0	0	0	0	0	0
sp|P38791|DHYS_YEAST	DHYS	sp|P38791|DHYS_YEAST	47686000	0	0	19017000	0	0	57046000	0	0	0	0	0	84558000	35787000	19923000	0	0	0	43621000	0	0	19496000	0	0
sp|P38792|RRP4_YEAST	RRP4	sp|P38792|RRP4_YEAST	0	0	0	0	0	0	7077500	0	0	0	0	0	0	0	0	0	0	0	0	0	0	0	0	0
sp|P38795|NADE_YEAST	NADE	sp|P38795|NADE_YEAST	40277000	46517000	33852000	17660000	0	0	41851000	85343000	0	22569000	17865000	0	71229000	80506000	44037000	38052000	0	0	58004000	77062000	49169000	29122000	24043000	0
sp|P38804|SDO1L_YEAST	SDO1L	sp|P38804|SDO1L_YEAST	22117000	0	0	0	0	0	33335000	0	0	0	0	0	26198000	0	0	0	0	0	19862000	0	0	0	0	0
sp|P38805|RPF1_YEAST	RPF1	sp|P38805|RPF1_YEAST	0	0	122680000	123630000	38480000	0	0	0	124930000	135500000	67606000	0	0	0	213670000	179210000	39289000	0	0	0	129570000	190310000	49827000	0
sp|P38809|YHP7_YEAST	YHP7	sp|P38809|YHP7_YEAST	0	0	0	0	0	0	0	0	0	0	0	0	0	0	0	0	0	0	16668000	0	0	0	0	0
sp|P38810|SFB3_YEAST	SFB3	sp|P38810|SFB3_YEAST	39572000	0	0	0	0	0	26789000	0	0	0	0	0	0	0	0	0	0	0	0	0	0	0	0	0
sp|P38811|TRA1_YEAST	TRA1	sp|P38811|TRA1_YEAST	776840000	2009400000	1166400000	0	0	0	1112800000	1658200000	0	0	0	0	1003900000	6017500000	1470700000	0	539570000	0	1537600000	6651300000	0	661330000	0	0
sp|P38813|BIG1_YEAST	BIG1	sp|P38813|BIG1_YEAST	0	0	0	0	0	0	0	0	0	0	0	0	0	0	0	0	0	0	3929300	0	0	0	0	0
sp|P38817|GGA2_YEAST	GGA2	sp|P38817|GGA2_YEAST	60413000	0	0	0	0	0	56978000	0	0	0	0	0	55019000	0	0	0	0	0	58466000	0	0	0	0	0
sp|P38818|CTM1_YEAST	CTM1	sp|P38818|CTM1_YEAST	0	0	0	0	0	0	0	0	0	0	0	0	0	0	0	0	0	0	2009400	0	0	0	0	0
sp|P38819|ERP5_YEAST	ERP5	sp|P38819|ERP5_YEAST	0	0	0	0	0	109080000	0	0	0	0	0	0	0	0	0	88404000	165310000	119480000	0	0	0	0	96288000	0
sp|P38820|UBA4_YEAST	UBA4	sp|P38820|UBA4_YEAST	0	0	0	0	0	0	11181000	0	0	0	0	0	0	0	0	0	0	0	0	0	0	0	0	0
sp|P38821|DNPEP_YEAST	DNPEP	sp|P38821|DNPEP_YEAST	108980000	235360000	67863000	0	31242000	0	52106000	339850000	79711000	0	0	0	75486000	316340000	74256000	0	0	0	111690000	182860000	41267000	22238000	0	0
sp|P38828|LSM12_YEAST	LSM12	sp|P38828|LSM12_YEAST	57014000	0	0	0	0	0	59229000	0	0	0	0	0	75925000	0	0	0	0	0	60124000	0	0	0	0	0
sp|P38836|ECM14_YEAST	ECM14	sp|P38836|ECM14_YEAST	9618100	0	0	0	0	0	11749000	6812600	0	0	0	0	15977000	0	0	0	0	0	28732000	7987000	0	0	0	0
sp|P38840|ARO9_YEAST	ARO9	sp|P38840|ARO9_YEAST	148560000	0	0	53449000	0	0	67197000	0	0	31045000	71064000	39783000	141780000	0	0	40872000	71429000	16443000	120270000	0	0	54471000	52419000	0
sp|P38845|CRP1_YEAST	CRP1	sp|P38845|CRP1_YEAST	37277000	0	0	0	0	0	29150000	0	0	0	0	0	0	0	0	0	0	0	20642000	0	0	0	0	0
sp|P38856|AP18A_YEAST	AP18A	sp|P38856|AP18A_YEAST	0	0	0	0	0	0	0	0	0	0	0	0	0	0	0	0	0	0	5188300	0	0	0	0	0
sp|P38858|SOL3_YEAST	SOL3	sp|P38858|SOL3_YEAST	21420000	0	0	0	0	0	20432000	0	0	0	0	0	30639000	0	0	0	0	0	24342000	0	0	0	0	0
sp|P38861|NMD3_YEAST	NMD3	sp|P38861|NMD3_YEAST	0	45787000	191550000	25828000	0	0	0	72068000	99946000	58456000	40354000	0	0	27508000	143680000	26229000	0	0	0	0	70858000	22881000	0	0
sp|P38862|ATG7_YEAST	ATG7	sp|P38862|ATG7_YEAST	0	0	0	0	0	0	0	0	0	0	0	0	50601000	0	0	0	0	0	0	0	0	0	0	0
sp|P38869|SVP26_YEAST	SVP26	sp|P38869|SVP26_YEAST	0	0	18268000	0	65141000	53402000	0	18956000	0	21373000	39650000	49121000	0	0	18485000	24954000	97102000	66746000	0	16775000	0	36075000	77477000	52831000
sp|P38871|SSP1_YEAST	SSP1	sp|P38871|SSP1_YEAST	0	0	0	0	0	0	0	0	0	0	0	0	0	0	0	0	0	0	37395000	0	0	0	0	0
sp|P38875|GPI16_YEAST	GPI16	sp|P38875|GPI16_YEAST	0	59884000	56217000	69491000	104660000	183460000	22225000	57004000	0	53822000	94169000	152430000	41556000	69595000	68253000	88162000	156290000	173450000	19816000	74689000	68360000	76401000	126100000	115460000
sp|P38878|LNP_YEAST	LNP	sp|P38878|LNP_YEAST	0	0	0	0	0	0	0	0	0	0	0	0	0	0	0	0	0	0	0	0	0	2359900	0	0
sp|P38879|NACA_YEAST	NACA	sp|P38879|NACA_YEAST	0	0	0	0	0	0	0	0	0	0	0	0	0	0	0	0	0	0	3031900	0	0	0	0	0
sp|P38882|UTP9_YEAST	UTP9	sp|P38882|UTP9_YEAST	0	0	63614000	438110000	98590000	29125000	0	9284000	0	437870000	178120000	37306000	0	0	111420000	422260000	67379000	17481000	0	0	65198000	357680000	122940000	44510000
sp|P38884|AIM18_YEAST	AIM18	sp|P38884|AIM18_YEAST	13388000	0	0	0	0	0	18749000	0	0	0	0	0	0	0	0	0	0	0	7671400	0	0	0	0	0
sp|P38885|AIM46_YEAST	AIM46	sp|P38885|AIM46_YEAST	0	0	0	9444700	11383000	28107000	9539900	0	0	0	16005000	25354000	0	0	0	0	16671000	40514000	14596000	0	0	0	0	0
sp|P38886|RPN10_YEAST	RPN10	sp|P38886|RPN10_YEAST	173840000	36710000	42722000	0	25645000	23765000	137710000	69245000	0	0	31093000	0	139170000	83219000	47367000	35104000	0	0	133440000	44760000	46503000	30609000	0	0
sp|P38887|YH02_YEAST	YH02	sp|P38887|YH02_YEAST	29764000	46159000	24202000	0	0	14849000	23832000	29272000	0	0	0	0	29717000	45885000	33123000	17560000	0	19884000	33211000	0	19447000	0	0	0
sp|P38891|BCA1_YEAST	BCA1	sp|P38891|BCA1_YEAST	719280000	46401000	22977000	37148000	31178000	26451000	698250000	27808000	36807000	29429000	26766000	24870000	294700000	17355000	0	28425000	18163000	5958500	337150000	0	21273000	22136000	19475000	0
sp|P38910|CH10_YEAST	CH10	sp|P38910|CH10_YEAST	123270000	0	0	0	0	0	144740000	0	0	0	0	0	21801000	0	0	0	0	0	17672000	0	0	0	0	0
sp|P38911|FKBP3_YEAST	FKBP3	sp|P38911|FKBP3_YEAST	102430000	102570000	67534000	96646000	29689000	0	91784000	154680000	87298000	166590000	50183000	0	127710000	84661000	64484000	45192000	0	0	119800000	85485000	83311000	40731000	28772000	30136000
sp|P38912|IF1A_YEAST	IF1A	sp|P38912|IF1A_YEAST	55232000	0	0	0	0	0	0	0	0	0	0	0	95488000	0	0	0	0	0	0	0	0	0	0	0
sp|P38913|FAD1_YEAST	FAD1	sp|P38913|FAD1_YEAST	0	0	0	0	0	0	0	0	0	0	0	0	0	0	0	0	0	0	0	0	3859300	0	0	0
sp|P38922|HRB1_YEAST	HRB1	sp|P38922|HRB1_YEAST	9894900	0	0	0	0	0	19019000	12225000	0	0	0	0	15152000	0	0	0	0	0	26594000	0	0	0	0	0
sp|P38929|ATC2_YEAST	ATC2	sp|P38929|ATC2_YEAST	87347000	158630000	144860000	84737000	80516000	72595000	75355000	139930000	107120000	85934000	100540000	0	79404000	143970000	150080000	96167000	73993000	86437000	90140000	131340000	136830000	83632000	82307000	106190000
sp|P38930|CSK2C_YEAST	CSK2C	sp|P38930|CSK2C_YEAST	0	0	0	0	0	0	6711800	0	0	0	0	0	0	0	0	0	0	0	7484700	0	0	0	0	0
sp|P38932|VPS45_YEAST	VPS45	sp|P38932|VPS45_YEAST	0	0	0	0	0	0	0	0	0	0	0	0	0	0	0	0	0	0	5377100	0	0	0	0	0
sp|P38934|BFR1_YEAST	BFR1	sp|P38934|BFR1_YEAST	817610000	357240000	156260000	51768000	38079000	14327000	871400000	316370000	132450000	121850000	53176000	39839000	1008100000	226640000	215460000	47630000	0	0	1109800000	265310000	75252000	43005000	30052000	0
sp|P38958|PT100_YEAST	PT100	sp|P38958|PT100_YEAST	10701000	10686000	26149000	116360000	116860000	122610000	0	0	0	84668000	137160000	216960000	0	0	0	13320000	18431000	20453000	0	0	0	13125000	16486000	10445000
sp|P38968|SEC31_YEAST	SEC31	sp|P38968|SEC31_YEAST	201480000	38437000	38555000	73925000	58007000	42886000	214560000	48006000	40316000	62471000	79751000	31023000	184030000	44877000	41669000	88037000	72045000	59328000	176070000	81348000	25157000	98002000	54413000	48357000
sp|P38969|PNT1_YEAST	PNT1	sp|P38969|PNT1_YEAST	0	0	0	36058000	33597000	54390000	0	0	0	27877000	54625000	48966000	0	0	0	0	0	0	0	0	0	0	0	0
sp|P38972|PUR4_YEAST	PUR4	sp|P38972|PUR4_YEAST	763040000	25057000	38957000	67748000	117020000	55767000	1016800000	51768000	26683000	82901000	62953000	99647000	949810000	184420000	79269000	133270000	88356000	84339000	1021900000	130340000	59587000	184380000	159250000	88647000
sp|P38988|GGC1_YEAST	GGC1	sp|P38988|GGC1_YEAST	216720000	557440000	699660000	438020000	479230000	405280000	220330000	805070000	622730000	470000000	633880000	920080000	138240000	188680000	221950000	151670000	235200000	218520000	144010000	161840000	85035000	126240000	173530000	133640000
sp|P38989|SMC2_YEAST	SMC2	sp|P38989|SMC2_YEAST	0	0	0	0	0	0	0	0	0	0	0	0	0	0	0	0	0	0	0	0	0	0	0	0
sp|P38992|SUR2_YEAST	SUR2	sp|P38992|SUR2_YEAST	0	0	0	0	0	0	0	0	0	0	0	0	0	0	0	0	0	0	0	0	0	0	0	22949000
sp|P38993|FET3_YEAST	FET3	sp|P38993|FET3_YEAST	8560000	0	0	0	0	0	0	0	0	0	0	0	0	0	0	0	0	0	25546000	7680300	0	0	0	0
sp|P38996|NAB3_YEAST	NAB3	sp|P38996|NAB3_YEAST	48128000	0	0	0	0	0	46169000	0	0	0	0	0	46819000	13729000	0	0	0	0	39292000	0	0	0	0	0
sp|P38998|LYS1_YEAST	LYS1	sp|P38998|LYS1_YEAST	94748000	0	0	0	0	0	63293000	25971000	0	0	0	0	141120000	32464000	0	0	0	0	98452000	0	0	0	0	0
sp|P38999|LYS9_YEAST	LYS9	sp|P38999|LYS9_YEAST	39733000	0	0	0	0	0	0	0	0	0	0	0	41160000	16441000	22559000	0	0	0	59698000	0	0	0	0	0
sp|P39002|LCF3_YEAST	LCF3	sp|P39002|LCF3_YEAST	0	0	0	0	0	0	0	0	0	0	0	0	0	0	0	0	0	0	0	0	0	0	0	30765000
sp|P39005|KRE9_YEAST	KRE9	sp|P39005|KRE9_YEAST	0	0	0	0	0	0	0	0	0	0	0	0	0	0	0	0	0	0	0	3401400	0	0	0	0
sp|P39006|PSD1_YEAST	PSD1	sp|P39006|PSD1_YEAST	6490500	0	0	0	0	0	0	0	0	0	0	0	0	0	0	0	0	0	0	0	0	0	0	0
sp|P39007|STT3_YEAST	STT3	sp|P39007|STT3_YEAST	20131000	261570000	212020000	113330000	128230000	126550000	99411000	153320000	79744000	74793000	110180000	227740000	42479000	162420000	144630000	105310000	159830000	146140000	55624000	249380000	200990000	93015000	117200000	88364000
sp|P39009|DUN1_YEAST	DUN1	sp|P39009|DUN1_YEAST	7560900	0	0	0	0	0	6329100	0	0	0	0	0	11374000	0	0	0	0	0	9751300	0	0	0	0	0
sp|P39010|AKR1_YEAST	AKR1	sp|P39010|AKR1_YEAST	0	0	0	0	0	0	0	0	0	0	0	0	0	0	0	0	0	0	0	0	0	0	9597600	0
sp|P39012|GAA1_YEAST	GAA1	sp|P39012|GAA1_YEAST	0	0	0	16443000	36894000	43988000	0	0	0	13134000	20982000	0	0	0	0	25369000	21565000	0	0	0	0	23714000	29412000	20651000
sp|P39013|END3_YEAST	END3	sp|P39013|END3_YEAST	0	0	0	0	0	0	2507800	0	0	0	0	0	0	0	0	0	0	0	0	0	0	0	0	0
sp|P39015|STM1_YEAST	STM1	sp|P39015|STM1_YEAST	103930000	4862700000	4479200000	15991000000	1159500000	163680000	49030000	3692100000	2415600000	20649000000	3721100000	907020000	5180900	1487500000	4145900000	4130600000	283940000	19860000	25621000	3467300000	1985300000	5566700000	261220000	19112000
sp|P39076|TCPB_YEAST	TCPB	sp|P39076|TCPB_YEAST	46811000	133200000	35346000	0	0	0	86264000	128720000	0	20089000	0	0	40755000	70814000	25413000	18572000	0	0	36102000	72959000	34971000	0	0	0
sp|P39077|TCPG_YEAST	TCPG	sp|P39077|TCPG_YEAST	761850000	867970000	268170000	111610000	113760000	0	692970000	1576800000	222840000	133800000	0	0	504290000	487600000	198330000	117900000	174570000	0	543370000	384320000	0	133110000	0	83771000
sp|P39078|TCPD_YEAST	TCPD	sp|P39078|TCPD_YEAST	119330000	322970000	152890000	80545000	64251000	67164000	99410000	319620000	95710000	77465000	90865000	83882000	78957000	230100000	169810000	93649000	71972000	79543000	82894000	223490000	141660000	97598000	92194000	92860000
sp|P39079|TCPZ_YEAST	TCPZ	sp|P39079|TCPZ_YEAST	97883000	32549000	0	10737000	0	16043000	70935000	42207000	0	0	17048000	0	38280000	64989000	0	0	0	0	65732000	34152000	0	11057000	0	0
sp|P39101|CAJ1_YEAST	CAJ1	sp|P39101|CAJ1_YEAST	0	0	0	0	0	0	25057000	0	0	0	0	0	0	0	0	0	0	0	0	0	0	0	0	0
sp|P39103|COX14_YEAST	COX14	sp|P39103|COX14_YEAST	0	23931000	24958000	46800000	50110000	55825000	21555000	15904000	0	30947000	48531000	93975000	17911000	12788000	20304000	0	0	0	18120000	14300000	0	0	0	0
sp|P39105|PLB1_YEAST	PLB1	sp|P39105|PLB1_YEAST	278130000	504130000	520320000	547940000	1073200000	1533000000	213070000	281930000	604010000	346090000	828710000	1175000000	393290000	472670000	615160000	498300000	785700000	972330000	236290000	577670000	494210000	447670000	650380000	831310000
sp|P39107|MNN9_YEAST	MNN9	sp|P39107|MNN9_YEAST	0	0	74939000	138760000	232550000	283450000	111030000	161150000	0	69800000	160640000	210590000	171360000	51413000	45617000	169900000	409060000	362350000	0	0	130830000	220210000	387430000	301330000
sp|P39109|YCFI_YEAST	YCFI	sp|P39109|YCFI_YEAST	36947000	180820000	61624000	75463000	83026000	38040000	58409000	192100000	0	56825000	51907000	0	102740000	174820000	120600000	107030000	83291000	87640000	85295000	172800000	113690000	97793000	84000000	0
sp|P39111|VATF_YEAST	VATF	sp|P39111|VATF_YEAST	4720900	1120700	0	0	0	0	5990900	865870	0	0	0	0	3363100	0	0	0	0	0	5514900	1442200	0	0	0	0
sp|P39112|DSS1_YEAST	DSS1	sp|P39112|DSS1_YEAST	0	37752000	29532000	25435000	0	0	0	37683000	33670000	55090000	27526000	0	0	25487000	30761000	21786000	0	0	0	0	25145000	10233000	0	0
sp|P39516|RS14B_YEAST	RS14B	sp|P39516|RS14B_YEAST	11718000	1224100000	620950000	22680000000	16919000000	29616000000	4251400	1672600000	494370000	23155000000	17868000000	19880000000	3302000	744470000	991560000	14920000000	20756000000	35905000000	2438100	652410000	492650000	15381000000	17469000000	35921000000
sp|P39517|DHH1_YEAST	DHH1	sp|P39517|DHH1_YEAST	47091000	12993000	0	12894000	0	0	32106000	0	0	0	16811000	0	16334000	16472000	0	0	17590000	0	28173000	17215000	0	17626000	14405000	0
sp|P39518|LCF2_YEAST	LCF2	sp|P39518|LCF2_YEAST	81433000	75881000	62062000	74639000	136850000	234250000	82031000	105480000	73911000	77815000	129240000	177770000	76076000	191920000	103970000	122100000	123920000	212650000	78218000	168610000	96831000	143510000	155130000	226530000
sp|P39522|ILV3_YEAST	ILV3	sp|P39522|ILV3_YEAST	131740000	39723000	0	16670000	0	18015000	159480000	30823000	0	31584000	16302000	0	118310000	44174000	70036000	35433000	30361000	0	159910000	28766000	0	35576000	19907000	0
sp|P39525|CEM1_YEAST	CEM1	sp|P39525|CEM1_YEAST	0	0	0	0	0	0	0	0	0	0	0	0	0	6548000	0	0	0	0	0	0	0	0	0	0
sp|P39540|ELO1_YEAST	ELO1	sp|P39540|ELO1_YEAST	0	0	0	0	0	0	0	0	0	0	0	0	0	0	0	0	0	0	0	0	0	0	0	14319000
sp|P39547|UIP3_YEAST	UIP3	sp|P39547|UIP3_YEAST	0	0	0	0	0	0	0	0	0	0	0	13223000	0	0	0	0	0	0	0	0	0	0	0	0
sp|P39676|FHP_YEAST	FHP	sp|P39676|FHP_YEAST	2410600000	559760000	461670000	218530000	165320000	186520000	2201100000	398610000	139450000	175250000	218570000	210160000	1475000000	347070000	186900000	168350000	66219000	64575000	1064400000	301930000	207690000	125010000	143570000	86493000
sp|P39677|RRF2M_YEAST	RRF2M	sp|P39677|RRF2M_YEAST	23234000	0	0	0	0	0	32705000	0	0	0	0	0	29075000	0	0	0	0	0	26912000	0	0	0	0	0
sp|P39683|NPT1_YEAST	NPT1	sp|P39683|NPT1_YEAST	49791000	0	0	0	0	0	56831000	0	0	0	0	0	41635000	30157000	0	0	0	0	35472000	0	0	0	0	0
sp|P39685|PO152_YEAST	PO152	sp|P39685|PO152_YEAST	0	36698000	0	0	0	0	0	25258000	0	0	0	0	0	11454000	0	0	0	0	0	17653000	0	0	0	0
sp|P39692|MET10_YEAST	MET10	sp|P39692|MET10_YEAST	0	0	0	0	0	0	0	0	0	0	0	0	0	0	0	0	0	0	5046000	0	0	0	0	0
sp|P39704|ERP2_YEAST	ERP2	sp|P39704|ERP2_YEAST	0	0	0	0	0	0	0	0	0	0	0	0	0	0	0	0	0	0	0	0	0	0	0	59642000
sp|P39708|DHE5_YEAST	DHE5	sp|P39708|DHE5_YEAST	306010000	113370000	37494000	69094000	35106000	29808000	255520000	156630000	35304000	61469000	66792000	21030000	161930000	96178000	40136000	36417000	12113000	0	133300000	40241000	0	38266000	20929000	50826000
sp|P39714|BDH1_YEAST	BDH1	sp|P39714|BDH1_YEAST	555250000	70295000	65846000	32142000	47190000	35373000	535520000	177240000	100400000	33583000	45171000	34798000	473970000	108140000	37036000	39554000	29251000	0	343360000	52327000	64366000	29033000	30140000	13853000
sp|P39719|FLC2_YEAST	FLC2	sp|P39719|FLC2_YEAST	0	0	0	0	0	0	0	0	0	0	0	0	0	0	0	0	0	44693000	0	0	0	0	0	0
sp|P39726|GCSH_YEAST	GCSH	sp|P39726|GCSH_YEAST	695120000	20372000	0	0	0	0	644500000	36994000	0	26315000	18068000	0	163180000	0	0	0	0	0	267570000	20551000	0	0	0	0
sp|P39727|ERV46_YEAST	ERV46	sp|P39727|ERV46_YEAST	15703000	0	0	61209000	97535000	99747000	0	0	0	63684000	62103000	69880000	50564000	52289000	0	79661000	141810000	124610000	27111000	68469000	0	68252000	68683000	66905000
sp|P39729|RBG1_YEAST	RBG1	sp|P39729|RBG1_YEAST	190460000	222260000	177470000	111100000	0	0	149140000	1096500000	250860000	196910000	150250000	0	168040000	130880000	188490000	0	0	0	121240000	146090000	0	0	0	0
sp|P39730|IF2P_YEAST	IF2P	sp|P39730|IF2P_YEAST	363430000	342240000	151420000	86444000	41282000	60382000	309170000	378400000	111320000	154520000	88054000	108920000	483720000	364440000	178650000	103600000	68590000	45876000	418760000	409700000	70487000	96638000	101820000	77611000
sp|P39742|SEC72_YEAST	SEC72	sp|P39742|SEC72_YEAST	563270000	453210000	279650000	925000000	1196100000	1693900000	0	0	0	698560000	1472000000	1776500000	0	0	0	1289200000	3743700000	3761300000	0	0	0	1013200000	2710500000	1633400000
sp|P39743|RV167_YEAST	RV167	sp|P39743|RV167_YEAST	49588000	27623000	0	0	0	20749000	55721000	17723000	0	0	0	0	46756000	24447000	19681000	0	0	0	39422000	0	0	0	0	0
sp|P39744|NOC2_YEAST	NOC2	sp|P39744|NOC2_YEAST	0	0	332840000	137810000	68419000	92910000	0	114340000	165660000	323800000	82166000	0	13197000	58055000	170080000	129500000	58796000	0	21714000	59633000	150160000	142860000	80003000	0
sp|P39925|AFG3_YEAST	AFG3	sp|P39925|AFG3_YEAST	31167000	123920000	63715000	115900000	215600000	406370000	27414000	105700000	34429000	70576000	134790000	268840000	16880000	24363000	29888000	74148000	184340000	202560000	23205000	43377000	59548000	109260000	180820000	151050000
sp|P39926|SSO2_YEAST	SSO2	sp|P39926|SSO2_YEAST	56070000	82905000	136770000	146950000	153670000	211720000	0	98481000	149640000	108330000	145820000	290570000	0	0	82905000	155140000	313670000	317670000	53551000	87380000	98337000	151010000	308610000	233930000
sp|P39927|PTI1_YEAST	PTI1	sp|P39927|PTI1_YEAST	0	0	0	0	0	0	0	0	0	0	0	0	0	0	0	0	0	0	8607200	0	0	0	0	0
sp|P39929|SNF7_YEAST	SNF7	sp|P39929|SNF7_YEAST	0	0	199540000	111120000	53723000	46182000	0	0	109290000	140470000	63452000	58293000	0	0	157800000	142290000	65894000	59140000	0	0	0	115600000	45894000	59841000
sp|P39931|SS120_YEAST	SS120	sp|P39931|SS120_YEAST	0	0	0	0	0	0	0	0	0	0	0	0	0	0	0	0	0	0	0	0	0	0	0	5003700
sp|P39935|IF4F1_YEAST	IF4F1	sp|P39935|IF4F1_YEAST	58251000	0	0	32346000	0	0	81758000	38204000	0	0	0	0	123970000	48773000	32299000	46765000	35836000	0	77834000	57267000	0	0	0	0
sp|P39936|IF4F2_YEAST	IF4F2	sp|P39936|IF4F2_YEAST	31157000	0	0	0	0	0	27900000	0	0	0	0	0	41914000	0	0	0	0	0	45162000	0	0	0	0	0
sp|P39938|RS26A_YEAST	RS26A	sp|P39938|RS26A_YEAST	0	178070000	707160000	12371000000	7430900000	14399000000	38133000	311740000	291960000	12608000000	7693200000	17748000000	31079000	645500000	436350000	6652000000	8820400000	12235000000	52139000	708350000	339590000	6687200000	6369500000	11650000000
sp|P39940|RSP5_YEAST	RSP5	sp|P39940|RSP5_YEAST	111710000	79544000	0	27205000	34817000	37189000	88067000	43896000	0	46959000	25825000	19314000	93622000	48243000	64155000	51180000	46910000	46082000	72889000	61875000	45783000	38523000	48301000	0
sp|P39952|OXA1_YEAST	OXA1	sp|P39952|OXA1_YEAST	0	0	0	0	0	0	0	0	0	0	0	0	0	0	0	0	0	0	2408200	0	0	0	0	0
sp|P39954|SAHH_YEAST	SAHH	sp|P39954|SAHH_YEAST	631000000	498610000	451250000	266500000	295280000	181450000	521720000	731260000	431410000	293630000	294190000	267910000	475680000	659440000	519490000	351910000	246520000	234340000	395660000	471200000	429860000	359090000	275410000	259680000
sp|P39958|GDI1_YEAST	GDI1	sp|P39958|GDI1_YEAST	380140000	65722000	22115000	0	11994000	0	304120000	62994000	8871800	0	4819800	26119000	295050000	62073000	26737000	41845000	2894900	0	381170000	29396000	0	0	0	0
sp|P39960|BEM2_YEAST	BEM2	sp|P39960|BEM2_YEAST	0	0	0	0	0	0	6942500	0	0	0	0	0	9985900	0	0	0	0	0	0	0	0	0	0	0
sp|P39965|SYPM_YEAST	SYPM	sp|P39965|SYPM_YEAST	18719000	0	0	0	0	0	20703000	0	0	3210300	0	0	0	0	0	0	0	0	6619600	0	0	0	0	0
sp|P39966|PP2C2_YEAST	PP2C2	sp|P39966|PP2C2_YEAST	29990000	0	0	0	0	0	27565000	0	0	0	0	0	31025000	0	0	0	0	0	33613000	0	0	18693000	0	0
sp|P39968|VAC8_YEAST	VAC8	sp|P39968|VAC8_YEAST	71971000	62095000	52696000	0	43809000	49051000	45884000	45843000	0	0	45337000	0	42468000	74110000	61645000	0	19114000	0	62034000	51281000	41837000	0	0	0
sp|P39976|DLD3_YEAST	DLD3	sp|P39976|DLD3_YEAST	15605000	0	0	0	0	0	19291000	0	0	0	0	0	13670000	0	0	0	0	0	21194000	0	0	0	0	0
sp|P39984|HAT2_YEAST	HAT2	sp|P39984|HAT2_YEAST	0	0	0	0	0	0	12432000	0	0	0	0	0	0	0	0	0	0	0	0	0	0	0	0	0
sp|P39986|ATC6_YEAST	ATC6	sp|P39986|ATC6_YEAST	187810000	510300000	389950000	261850000	296200000	305540000	177040000	491160000	278850000	282280000	289720000	437480000	242740000	325740000	325730000	238920000	294740000	290720000	220820000	357110000	267220000	220640000	245180000	220050000
sp|P39990|SNU13_YEAST	SNU13	sp|P39990|SNU13_YEAST	83054000	0	52720000	181330000	168690000	120580000	74681000	0	49276000	193150000	181190000	111240000	56156000	0	52378000	227990000	111700000	84682000	63397000	0	0	155570000	159480000	110920000
sp|P39994|YEC0_YEAST	YEC0	sp|P39994|YEC0_YEAST	35019000	0	0	0	32622000	59785000	32828000	0	0	16934000	29842000	38397000	0	0	0	17801000	0	43332000	0	0	0	17068000	0	36199000
sp|P40007|NOP16_YEAST	NOP16	sp|P40007|NOP16_YEAST	0	0	573730000	109480000	108690000	0	0	0	129230000	77177000	110230000	0	0	0	251610000	54402000	0	0	0	0	94528000	0	0	0
sp|P40008|FMP52_YEAST	FMP52	sp|P40008|FMP52_YEAST	108020000	0	0	25810000	20882000	14602000	81504000	27707000	0	35840000	25114000	19672000	118300000	38849000	0	18715000	28825000	0	103550000	0	0	13858000	18254000	38535000
sp|P40010|NUG1_YEAST	NUG1	sp|P40010|NUG1_YEAST	21704000	0	147740000	57855000	38927000	60857000	0	0	88690000	138870000	95554000	66955000	0	0	169790000	46773000	45660000	48053000	0	0	99935000	90874000	109830000	75895000
sp|P40012|PPOX_YEAST	PPOX	sp|P40012|PPOX_YEAST	5390500	0	0	0	0	0	7181300	0	0	0	0	0	5167800	0	0	0	0	0	5464900	0	0	0	0	0
sp|P40015|ISC1_YEAST	ISC1	sp|P40015|ISC1_YEAST	0	0	0	0	0	0	0	0	0	0	0	0	0	0	0	7106300	0	13893000	0	0	0	0	0	0
sp|P40016|RPN3_YEAST	RPN3	sp|P40016|RPN3_YEAST	145860000	302390000	69373000	47056000	31560000	17510000	71849000	274060000	84881000	51900000	29848000	32243000	156420000	318800000	147680000	56895000	25821000	27345000	118480000	325410000	89078000	42826000	24574000	21514000
sp|P40017|YAT2_YEAST	YAT2	sp|P40017|YAT2_YEAST	347200000	319080000	140800000	117720000	134530000	79684000	299530000	322350000	100020000	125210000	141400000	112150000	751140000	816570000	449870000	325820000	239380000	258960000	878240000	655510000	193350000	308770000	233680000	238530000
sp|P40018|RSMB_YEAST	RSMB	sp|P40018|RSMB_YEAST	0	0	0	0	0	0	0	0	0	0	0	0	0	48643000	0	0	0	0	0	0	0	0	0	0
sp|P40024|ARB1_YEAST	ARB1	sp|P40024|ARB1_YEAST	170690000	75356000	64779000	105590000	115230000	82145000	163170000	85128000	0	111300000	139240000	126550000	204620000	100630000	111610000	119770000	111810000	129390000	235690000	72038000	105580000	108430000	113640000	125480000
sp|P40029|MSRA_YEAST	MSRA	sp|P40029|MSRA_YEAST	42821000	0	0	0	0	0	39765000	0	0	0	0	0	30724000	0	0	0	0	0	24889000	0	0	0	0	0
sp|P40030|ERG28_YEAST	ERG28	sp|P40030|ERG28_YEAST	80092000	0	103910000	158170000	161490000	175370000	83639000	191820000	117110000	108930000	164970000	179480000	54324000	127290000	56526000	61751000	150200000	128580000	65184000	0	83344000	135600000	114470000	102790000
sp|P40032|TPA1_YEAST	TPA1	sp|P40032|TPA1_YEAST	29849000	0	0	0	0	0	30856000	0	0	0	0	0	33436000	0	0	0	0	0	35709000	0	0	0	0	0
sp|P40033|RSM18_YEAST	RSM18	sp|P40033|RSM18_YEAST	0	93572000	83418000	183000000	330360000	55774000	0	0	41325000	129630000	406440000	92266000	0	191070000	79125000	110110000	0	106470000	0	176250000	0	128750000	335140000	169670000
sp|P40035|PIC2_YEAST	PIC2	sp|P40035|PIC2_YEAST	23196000	0	0	0	0	0	0	0	0	0	0	0	0	0	0	0	0	0	0	0	0	0	0	0
sp|P40037|HMF1_YEAST	HMF1	sp|P40037|HMF1_YEAST	102580000	0	0	0	0	0	114880000	0	0	0	0	0	96149000	0	0	15718000	0	0	85821000	0	0	0	0	0
sp|P40043|RGI1_YEAST	RGI1	sp|P40043|RGI1_YEAST	287080000	0	48475000	0	0	0	243600000	0	0	0	0	0	350040000	83332000	42813000	0	0	0	274320000	0	39866000	0	0	0
sp|P40046|VTC1_YEAST	VTC1	sp|P40046|VTC1_YEAST	0	0	0	0	0	0	0	0	0	0	0	0	0	0	0	0	0	0	0	0	0	0	58857000	0
sp|P40047|ALDH5_YEAST	ALDH5	sp|P40047|ALDH5_YEAST	14773000	0	0	0	0	0	19050000	0	0	0	0	0	0	0	0	0	0	0	0	0	0	0	0	0
sp|P40050|YEQ7_YEAST	YEQ7	sp|P40050|YEQ7_YEAST	0	28023000	14751000	21434000	0	0	0	43507000	0	46083000	0	0	0	19317000	0	15694000	0	0	0	17870000	0	14573000	0	0
sp|P40053|AIM9_YEAST	AIM9	sp|P40053|AIM9_YEAST	264050000	78327000	37007000	0	14357000	0	256030000	61722000	0	0	0	0	118620000	36106000	32419000	0	0	0	114230000	31298000	0	14442000	0	0
sp|P40054|SERA_YEAST	SERA	sp|P40054|SERA_YEAST	9982900	0	0	0	0	0	15090000	0	0	0	0	0	0	0	0	0	0	0	14722000	0	0	0	0	0
sp|P40055|UTP7_YEAST	UTP7	sp|P40055|UTP7_YEAST	0	0	199770000	848750000	146970000	0	0	0	47642000	864250000	344610000	0	0	348210000	301060000	771560000	116610000	11482000	0	14078000	108680000	817960000	136760000	43213000
sp|P40056|GET2_YEAST	GET2	sp|P40056|GET2_YEAST	0	0	0	0	0	0	0	0	0	0	0	0	0	0	0	0	0	0	0	0	0	0	0	2527500
sp|P40064|NU157_YEAST	NU157	sp|P40064|NU157_YEAST	0	18742000	0	0	18387000	0	0	16574000	0	8053600	0	0	0	26199000	27295000	18141000	0	0	0	19567000	0	21689000	0	0
sp|P40069|IMB4_YEAST	IMB4	sp|P40069|IMB4_YEAST	392110000	53741000	0	50057000	28677000	25246000	323950000	61974000	0	47067000	53195000	11798000	450360000	143440000	192710000	145020000	64560000	76007000	532350000	69704000	50369000	104360000	38902000	53092000
sp|P40074|AVT6_YEAST	AVT6	sp|P40074|AVT6_YEAST	0	0	0	0	0	0	0	0	0	0	0	0	0	0	0	0	0	0	0	0	0	0	0	2475600
sp|P40075|SCS2_YEAST	SCS2	sp|P40075|SCS2_YEAST	282310000	413090000	564810000	435630000	699070000	838550000	253200000	486050000	454800000	345280000	479320000	852170000	287820000	251810000	273140000	453100000	1062700000	1079800000	217810000	225920000	308910000	408540000	811600000	640700000
sp|P40078|NSA2_YEAST	NSA2	sp|P40078|NSA2_YEAST	0	32989000	412900000	51128000	28144000	0	0	27737000	180390000	148010000	30383000	0	0	0	717560000	92587000	31861000	0	0	18860000	220640000	76510000	28321000	26579000
sp|P40079|LCP5_YEAST	LCP5	sp|P40079|LCP5_YEAST	0	0	53871000	211170000	73161000	0	0	0	0	227750000	67337000	0	0	0	109000000	314180000	56863000	0	0	0	50868000	229810000	73115000	0
sp|P40086|COX15_YEAST	COX15	sp|P40086|COX15_YEAST	418270000	1107100000	1069000000	645200000	750600000	652940000	241070000	1195200000	823850000	592050000	761060000	1206100000	170220000	547900000	458530000	299450000	443540000	451350000	194150000	603900000	369430000	287730000	365880000	283720000
sp|P40087|DDI1_YEAST	DDI1	sp|P40087|DDI1_YEAST	51718000	91882000	150280000	180010000	333960000	496310000	44083000	0	0	86254000	193400000	387000000	65514000	101850000	87107000	158440000	404910000	526330000	43323000	120710000	126560000	165900000	323590000	282800000
sp|P40089|LSM5_YEAST	LSM5	sp|P40089|LSM5_YEAST	0	0	0	0	0	0	0	0	0	0	0	0	0	0	0	0	0	0	7317700	0	0	0	0	0
sp|P40093|YEY6_YEAST	YEY6	sp|P40093|YEY6_YEAST	68852000	35841000	0	0	0	0	72439000	0	0	0	0	0	32133000	0	0	0	0	0	58280000	0	0	0	0	0
sp|P40096|NCB1_YEAST	NCB1	sp|P40096|NCB1_YEAST	0	0	0	0	0	0	0	0	0	0	0	0	0	0	0	0	0	0	0	0	0	8554300	0	0
sp|P40098|FMP10_YEAST	FMP10	sp|P40098|FMP10_YEAST	76579000	42050000	113780000	104780000	101400000	78207000	107640000	83554000	125610000	90110000	131060000	92006000	46744000	94356000	269310000	58122000	63403000	44104000	37967000	24260000	101750000	46948000	54613000	52738000
sp|P40150|HSP76_YEAST	HSP76	sp|P40150|HSP76_YEAST	4849400000	5485500000	4250300000	5295900000	7474000000	11440000000	4855200000	5380000000	5797800000	7052600000	9328800000	14211000000	4534900000	4791700000	5619500000	4716300000	6636100000	10844000000	5124700000	4799700000	3803300000	4191500000	6305500000	11544000000
sp|P40154|IES2_YEAST	IES2	sp|P40154|IES2_YEAST	0	0	503770000	108490000	0	0	0	0	1270100000	62733000	0	0	0	0	2010900000	0	0	0	0	0	288820000	0	0	0
sp|P40165|NNRE_YEAST	NNRE	sp|P40165|NNRE_YEAST	25927000	0	0	16665000	14726000	0	34249000	0	0	0	24176000	22749000	35348000	0	13814000	36657000	41054000	27530000	31538000	0	27135000	31555000	26617000	24160000
sp|P40169|YNT4_YEAST	YNT4	sp|P40169|YNT4_YEAST	0	15222000	64355000	69865000	117330000	434730000	0	109960000	0	31295000	125610000	207120000	0	148180000	140230000	71340000	218100000	660760000	0	29758000	38637000	75717000	242870000	584750000
sp|P40185|MMF1_YEAST	MMF1	sp|P40185|MMF1_YEAST	152460000	0	0	29777000	0	0	165410000	0	0	31072000	31281000	0	68861000	0	0	23620000	0	0	55945000	0	0	0	0	0
sp|P40188|RGI2_YEAST	RGI2	sp|P40188|RGI2_YEAST	28246000	17760000	0	0	17884000	26683000	0	24995000	0	0	0	0	21761000	22195000	16955000	53166000	34115000	0	52468000	120500000	75332000	121040000	128010000	68820000
sp|P40210|SIP5_YEAST	SIP5	sp|P40210|SIP5_YEAST	0	0	0	0	0	0	0	0	0	0	0	0	0	0	0	0	0	0	7073900	0	0	0	0	0
sp|P40212|RL13B_YEAST	RL13B	sp|P40212|RL13B_YEAST	30055000	472550000	7698500000	41116000000	32235000000	49951000000	10832000	353740000	6645700000	41040000000	32103000000	40913000000	44819000	812020000	6687300000	20714000000	23928000000	42675000000	21157000	657620000	7471400000	23723000000	23808000000	47500000000
sp|P40215|NDH1_YEAST	NDH1	sp|P40215|NDH1_YEAST	0	69276000	77300000	34503000	0	0	46235000	61511000	60112000	26239000	0	0	131690000	78219000	127270000	60864000	74667000	46902000	147920000	84557000	0	85381000	92989000	72541000
sp|P40217|EIF3I_YEAST	EIF3I	sp|P40217|EIF3I_YEAST	79482000	41042000	33208000	0	43910000	0	70673000	65433000	94625000	41549000	45210000	0	86253000	0	37995000	54699000	38152000	0	71629000	0	0	36846000	15733000	0
sp|P40219|OSW5_YEAST	OSW5	sp|P40219|OSW5_YEAST	20070000	0	0	0	0	0	21929000	0	0	0	18945000	0	25958000	30671000	0	27884000	27764000	33671000	25541000	21556000	0	20890000	21832000	27517000
sp|P40260|MEP1_YEAST;sp|P53390|MEP3_YEAST	MEP1	sp|P40260|MEP1_YEAST;sp|P53390|MEP3_YEAST	0	0	0	0	0	0	0	0	0	0	0	0	0	0	0	0	0	0	0	0	0	0	0	34041000
sp|P40302|PSA6_YEAST	PSA6	sp|P40302|PSA6_YEAST	231510000	231970000	123490000	168440000	172320000	130740000	172090000	344230000	165980000	181150000	144420000	139270000	264900000	351970000	144240000	178840000	137400000	107310000	182860000	188360000	123840000	147780000	143350000	128170000
sp|P40303|PSA4_YEAST	PSA4	sp|P40303|PSA4_YEAST	105570000	27379000	26842000	43306000	30527000	35533000	72605000	97807000	33653000	60262000	39930000	42005000	0	84669000	25594000	52942000	0	16366000	42459000	45656000	50564000	35848000	28705000	25944000
sp|P40309|KHA1_YEAST	KHA1	sp|P40309|KHA1_YEAST	0	0	0	0	0	55405000	0	0	0	0	24641000	31635000	0	0	0	0	21802000	35701000	0	0	0	0	0	0
sp|P40312|CYB5_YEAST	CYB5	sp|P40312|CYB5_YEAST	156480000	0	0	113860000	236420000	139900000	113890000	191080000	253810000	0	0	188950000	0	0	0	0	136620000	0	49409000	0	0	0	142200000	0
sp|P40318|DOA10_YEAST	DOA10	sp|P40318|DOA10_YEAST	10657000	41305000	26191000	40595000	37234000	32293000	0	60382000	44103000	51601000	40734000	49690000	0	46625000	32613000	46332000	23863000	0	0	33496000	53583000	29534000	26875000	27387000
sp|P40319|ELO3_YEAST	ELO3	sp|P40319|ELO3_YEAST	0	0	0	0	0	0	0	0	0	0	0	0	0	0	0	35219000	46720000	0	0	0	0	0	0	0
sp|P40327|PRS4_YEAST	PRS4	sp|P40327|PRS4_YEAST	326630000	464750000	126690000	130200000	104300000	82246000	304680000	444470000	204070000	132110000	125920000	86433000	305760000	594180000	257500000	176790000	128710000	116060000	266500000	791600000	345250000	234650000	134070000	107750000
sp|P40335|PEP8_YEAST	PEP8	sp|P40335|PEP8_YEAST	17063000	0	0	0	0	0	17133000	0	0	0	0	0	10848000	0	0	0	0	0	0	0	0	0	0	0
sp|P40339|RFC4_YEAST	RFC4	sp|P40339|RFC4_YEAST	0	0	0	0	0	0	0	0	0	0	0	0	0	0	0	23228000	0	0	0	0	0	22544000	0	0
sp|P40340|TBP7_YEAST	TBP7	sp|P40340|TBP7_YEAST	0	0	0	18017000	14614000	16361000	0	0	0	19700000	16502000	0	0	0	0	29266000	0	0	0	0	0	27285000	0	0
sp|P40341|YTA12_YEAST	YTA12	sp|P40341|YTA12_YEAST	130080000	502000000	427740000	432880000	858170000	1412600000	80006000	354500000	276370000	237940000	474730000	877710000	35833000	193960000	205250000	209810000	784400000	856720000	41769000	259380000	223760000	370480000	900980000	779160000
sp|P40343|VPS27_YEAST	VPS27	sp|P40343|VPS27_YEAST	9863700	0	0	0	0	0	7296600	0	0	0	0	0	0	0	0	0	0	0	0	0	0	0	0	0
sp|P40344|ATG3_YEAST	ATG3	sp|P40344|ATG3_YEAST	13074000	0	0	0	0	0	12375000	0	0	0	0	0	13309000	0	0	0	0	0	12350000	0	0	0	0	0
sp|P40348|RFC2_YEAST	RFC2	sp|P40348|RFC2_YEAST	0	0	0	24984000	0	15556000	0	0	0	24838000	0	0	0	0	0	52027000	0	0	0	0	0	49364000	29597000	27459000
sp|P40350|ALG5_YEAST	ALG5	sp|P40350|ALG5_YEAST	0	0	0	0	0	0	0	0	0	0	0	0	0	0	0	0	0	0	7439500	0	0	0	0	0
sp|P40358|JEM1_YEAST	JEM1	sp|P40358|JEM1_YEAST	0	0	0	0	0	0	0	0	0	0	0	0	0	0	0	0	0	0	301630000	0	0	0	0	0
sp|P40362|UTP18_YEAST	UTP18	sp|P40362|UTP18_YEAST	0	0	55533000	317760000	102340000	19629000	0	0	0	374770000	131810000	35176000	0	0	73088000	403800000	62263000	13843000	0	0	34981000	352280000	85963000	30931000
sp|P40363|SFGH_YEAST	SFGH	sp|P40363|SFGH_YEAST	12359000	0	0	0	0	0	0	0	0	0	0	0	23402000	0	0	0	0	0	0	0	0	0	0	0
sp|P40364|MPM1_YEAST	MPM1	sp|P40364|MPM1_YEAST	253250000	86952000	22914000	23197000	25325000	63370000	234070000	112760000	20526000	39982000	28427000	17884000	196060000	55317000	0	19961000	13506000	16595000	155510000	24584000	0	13831000	17461000	16135000
sp|P40413|TCPE_YEAST	TCPE	sp|P40413|TCPE_YEAST	69226000	219820000	51378000	29424000	32603000	17622000	58283000	196150000	0	29392000	42097000	29107000	51795000	138240000	40722000	47767000	15037000	29902000	28280000	134580000	49929000	47366000	34380000	24027000
sp|P40414|TPM2_YEAST	TPM2	sp|P40414|TPM2_YEAST	13772000	103100000	91694000	0	0	0	22679000	83769000	0	0	0	0	0	26052000	0	0	0	0	0	40315000	0	0	0	0
sp|P40416|ATM1_YEAST	ATM1	sp|P40416|ATM1_YEAST	0	7468200	0	9867200	9604600	18243000	0	15921000	0	9629200	10596000	0	0	0	0	8266100	0	5285500	9317500	0	0	0	0	0
sp|P40433|6P21_YEAST	6P21	sp|P40433|6P21_YEAST	14713000	0	0	0	0	0	0	0	0	0	0	0	26745000	0	0	0	0	0	26831000	0	0	0	0	0
sp|P40452|COA1_YEAST	COA1	sp|P40452|COA1_YEAST	41629000	0	0	0	0	0	45837000	0	0	0	0	0	30649000	0	0	0	0	0	28447000	0	0	0	0	0
sp|P40459|PANC_YEAST	PANC	sp|P40459|PANC_YEAST	0	0	0	0	0	0	178240000	0	0	0	0	0	0	0	0	0	0	0	0	0	0	0	0	0
sp|P40462|TM108_YEAST	TM108	sp|P40462|TM108_YEAST	0	0	0	0	0	0	0	0	0	0	0	0	0	0	0	0	0	0	18023000	0	0	0	0	0
sp|P40467|ASG1_YEAST	ASG1	sp|P40467|ASG1_YEAST	0	0	0	0	0	0	0	0	0	0	0	0	0	0	0	0	0	0	0	4385700	0	0	0	0
sp|P40470|RRT14_YEAST	RRT14	sp|P40470|RRT14_YEAST	0	0	0	0	0	0	0	0	0	0	0	0	0	0	0	0	0	0	0	0	0	13764000	0	0
sp|P40471|AYR1_YEAST	AYR1	sp|P40471|AYR1_YEAST	66879000	42674000	0	27542000	47734000	31653000	56944000	40345000	0	33568000	23741000	50443000	63108000	17221000	0	28104000	0	27252000	52438000	26927000	0	41853000	0	0
sp|P40478|VDAC2_YEAST	VDAC2	sp|P40478|VDAC2_YEAST	0	0	0	0	112760000	148680000	0	0	0	0	66544000	84923000	0	0	0	108880000	298930000	342340000	0	0	0	127550000	292600000	283830000
sp|P40482|SEC24_YEAST	SEC24	sp|P40482|SEC24_YEAST	235410000	46208000	34060000	56746000	61369000	26108000	207350000	66518000	21242000	77302000	64715000	43613000	155150000	79038000	79263000	116790000	84213000	31960000	212870000	83880000	0	89013000	52340000	53890000
sp|P40483|YIK8_YEAST	YIK8	sp|P40483|YIK8_YEAST	72862000	28115000	68360000	110060000	114660000	89635000	60466000	139150000	61890000	94758000	102550000	66796000	102820000	185050000	126720000	210020000	239270000	211460000	78006000	104430000	114590000	223720000	221380000	164170000
sp|P40485|SLM1_YEAST	SLM1	sp|P40485|SLM1_YEAST	12494000	0	0	0	0	0	11656000	0	0	0	14368000	0	24847000	7619700	0	0	0	0	21588000	0	0	0	0	0
sp|P40491|FMC1_YEAST	FMC1	sp|P40491|FMC1_YEAST	46666000	0	0	0	0	0	44782000	0	0	0	0	0	31166000	0	0	0	0	0	31892000	0	0	0	0	0
sp|P40495|LYS12_YEAST	LYS12	sp|P40495|LYS12_YEAST	153270000	87983000	0	0	0	0	122480000	84880000	0	153730000	0	224000000	142350000	69170000	0	66059000	0	165000000	115110000	62575000	107740000	153170000	0	0
sp|P40496|RT25_YEAST	RT25	sp|P40496|RT25_YEAST	24589000	926850000	626450000	806240000	1421100000	225110000	106080000	1273700000	427210000	869400000	1710100000	543050000	0	649310000	332200000	629610000	1192800000	436770000	0	837470000	205470000	479090000	1548100000	732900000
sp|P40502|AIM19_YEAST	AIM19	sp|P40502|AIM19_YEAST	14385000	0	0	0	0	0	13190000	26843000	0	0	0	0	0	0	0	0	0	0	0	0	0	0	0	0
sp|P40506|PPCS_YEAST	PPCS	sp|P40506|PPCS_YEAST	109460000	37416000	0	0	0	0	93772000	0	0	0	33890000	0	60752000	38842000	27373000	35592000	0	0	123790000	27222000	0	0	0	0
sp|P40508|YIH7_YEAST	YIH7	sp|P40508|YIH7_YEAST	0	38529000	67659000	60724000	206460000	209530000	0	0	0	44020000	91600000	186850000	0	0	0	27334000	92732000	104970000	21069000	0	0	41762000	105130000	74244000
sp|P40509|COPE_YEAST	COPE	sp|P40509|COPE_YEAST	54176000	0	0	12799000	12790000	0	45794000	29312000	0	23674000	0	0	65956000	0	0	32070000	21225000	17589000	69216000	18802000	0	20806000	0	18475000
sp|P40510|SER33_YEAST	SER33	sp|P40510|SER33_YEAST	108390000	43561000	0	0	0	0	85560000	0	0	0	29352000	0	67116000	0	0	0	0	0	93740000	20067000	0	0	0	0
sp|P40511|SPO22_YEAST	SPO22	sp|P40511|SPO22_YEAST	359900000	156060000	209050000	171040000	177010000	132150000	254770000	346440000	0	170210000	172400000	171110000	322560000	466330000	171050000	240490000	137320000	157210000	221720000	395260000	266370000	200190000	128080000	152250000
sp|P40513|MAM33_YEAST	MAM33	sp|P40513|MAM33_YEAST	521830000	239000000	226020000	39432000	42422000	22873000	756380000	311590000	109870000	91277000	33366000	82164000	125310000	99254000	54615000	23574000	15117000	10136000	82813000	47282000	48287000	23594000	21122000	18710000
sp|P40515|FIS1_YEAST	FIS1	sp|P40515|FIS1_YEAST	0	0	0	0	0	0	0	0	0	0	8999500	0	0	0	0	0	0	0	0	0	0	0	0	0
sp|P40517|YRB2_YEAST	YRB2	sp|P40517|YRB2_YEAST	0	0	0	0	0	0	0	0	0	0	0	0	0	0	0	0	0	0	5171700	0	0	0	0	0
sp|P40518|ARPC5_YEAST	ARPC5	sp|P40518|ARPC5_YEAST	13458000	0	0	0	0	0	0	0	0	0	0	0	0	0	0	0	0	0	0	0	0	0	0	0
sp|P87262|RL34A_YEAST;sp|P40525|RL34B_YEAST	RL34A	sp|P87262|RL34A_YEAST;sp|P40525|RL34B_YEAST	72782000	0	2246000000	10749000000	8998600000	12708000000	0	154620000	1836600000	13160000000	7833600000	14284000000	0	187220000	2156700000	9422000000	6998600000	10494000000	0	181360000	1172600000	5709300000	6120000000	12493000000
sp|P40528|SYG1_YEAST	SYG1	sp|P40528|SYG1_YEAST	0	0	0	0	0	0	0	0	0	0	0	0	0	0	0	0	2280900	0	0	0	0	0	0	0
sp|P40531|GVP36_YEAST	GVP36	sp|P40531|GVP36_YEAST	772550000	46446000	93219000	76270000	52277000	48437000	890240000	46496000	38017000	87951000	64319000	52730000	498800000	80270000	18993000	43350000	32874000	7367300	582490000	26237000	22019000	61080000	22594000	8671600
sp|P40535|ACA2_YEAST	ACA2	sp|P40535|ACA2_YEAST	0	0	0	0	0	0	0	0	0	0	0	0	0	0	0	0	0	0	3548100	0	0	0	0	0
sp|P40540|EMC5_YEAST	EMC5	sp|P40540|EMC5_YEAST	0	0	0	37246000	134920000	184360000	0	0	0	18703000	61794000	174210000	0	8448700	16963000	74879000	236670000	261040000	0	0	0	92992000	232320000	181360000
sp|P40541|SCC3_YEAST	SCC3	sp|P40541|SCC3_YEAST	20704000	0	0	10048000	0	11485000	24117000	0	0	0	0	0	22817000	0	0	0	12251000	16485000	31961000	0	0	0	0	0
sp|P40543|YIC4_YEAST	YIC4	sp|P40543|YIC4_YEAST	26356000	6656000	0	0	11012000	0	0	0	0	0	0	0	0	0	0	15270000	12786000	0	16903000	0	0	11335000	13123000	0
sp|P40548|SNL1_YEAST	SNL1	sp|P40548|SNL1_YEAST	0	0	0	0	0	0	0	0	0	0	0	0	0	0	0	0	59593000	0	0	0	0	0	0	0
sp|P40550|PDR11_YEAST	PDR11	sp|P40550|PDR11_YEAST	0	85352000	54881000	17667000	45868000	0	0	70657000	0	0	42020000	0	0	86115000	57227000	46758000	0	80343000	0	78012000	57336000	0	34065000	47576000
sp|P40553|DOT5_YEAST	DOT5	sp|P40553|DOT5_YEAST	0	0	0	0	0	0	28527000	0	0	0	0	0	0	0	0	0	0	0	0	0	0	0	0	0
sp|P40554|URM1_YEAST	URM1	sp|P40554|URM1_YEAST	0	0	0	0	0	0	0	0	0	0	0	0	0	0	0	0	0	0	10446000	0	0	0	0	0
sp|P40557|EPS1_YEAST	EPS1	sp|P40557|EPS1_YEAST	30863000	57446000	34507000	0	0	29937000	0	61634000	0	26124000	38909000	36925000	43652000	54089000	36937000	29695000	36973000	34552000	0	70102000	0	30576000	27005000	0
sp|P40561|SGN1_YEAST	SGN1	sp|P40561|SGN1_YEAST	0	0	0	0	0	0	0	0	0	0	0	0	0	0	0	0	0	0	0	0	0	0	2665000	0
sp|P40564|DJP1_YEAST	DJP1	sp|P40564|DJP1_YEAST	92661000	0	0	0	0	0	114160000	36410000	0	0	0	0	70883000	0	0	0	0	0	74096000	0	0	0	0	0
sp|P40579|YIV5_YEAST	YIV5	sp|P40579|YIV5_YEAST	34297000	0	0	0	0	0	57521000	0	0	0	0	0	0	0	0	0	0	0	17302000	0	0	0	0	0
sp|P40580|BZRD_YEAST	BZRD	sp|P40580|BZRD_YEAST	28647000	0	0	0	0	0	28114000	0	0	0	0	0	24486000	0	0	0	0	0	24678000	0	0	0	0	0
sp|P40581|GPX3_YEAST	GPX3	sp|P40581|GPX3_YEAST	176920000	0	0	0	0	0	118900000	0	0	0	0	0	98519000	0	0	13847000	0	0	220640000	0	0	14787000	0	0
sp|P40582|GST1_YEAST	GST1	sp|P40582|GST1_YEAST	0	33528000	43315000	34545000	43798000	29937000	34952000	0	0	34349000	33927000	0	35671000	73361000	42648000	35350000	34733000	0	45123000	41678000	0	32920000	57403000	42214000
sp|P40693|RLP7_YEAST	RLP7	sp|P40693|RLP7_YEAST	0	0	663710000	581630000	93449000	60988000	59665000	0	272580000	511020000	199270000	51160000	0	25784000	357140000	265760000	60900000	27563000	0	56495000	421550000	222830000	60994000	60654000
sp|P40825-2|SYA_YEAST;sp|P40825|SYA_YEAST	SYA	sp|P40825-2|SYA_YEAST;sp|P40825|SYA_YEAST	2379200000	202380000	126710000	51731000	39035000	36128000	2492500000	343360000	39176000	77921000	28320000	195410000	3268600000	412700000	204260000	117430000	11173000	9974000	3542600000	275670000	61670000	46181000	27367000	14633000
sp|P40850|MKT1_YEAST	MKT1	sp|P40850|MKT1_YEAST	34771000	0	0	0	28750000	14369000	80544000	0	0	13748000	0	12897000	77829000	0	0	29110000	0	14098000	73026000	0	0	24884000	28269000	0
sp|P40857|PHS1_YEAST	PHS1	sp|P40857|PHS1_YEAST	0	0	0	0	0	0	0	0	0	0	0	0	0	0	0	0	0	0	0	0	0	0	0	18828000
sp|P40858|RN49_YEAST	RN49	sp|P40858|RN49_YEAST	0	163300000	2298900000	399710000	354980000	101850000	16306000	86439000	2042400000	526630000	549440000	113190000	0	62511000	1054300000	225380000	253000000	126250000	0	49348000	933850000	175500000	288820000	156580000
sp|P40958|MAD2_YEAST	MAD2	sp|P40958|MAD2_YEAST	0	0	0	0	0	0	0	0	0	0	0	0	0	0	0	0	0	0	14378000	0	0	0	0	0
sp|P40961|PHB1_YEAST	PHB1	sp|P40961|PHB1_YEAST	78761000	676120000	1142700000	3115700000	3291400000	4292900000	73819000	223270000	262090000	1103700000	2745800000	4022400000	15729000	867850000	706630000	1177000000	2762500000	2657800000	3439900	416070000	1341400000	2360400000	2282500000	1459100000
sp|P40965|MSH4_YEAST	MSH4	sp|P40965|MSH4_YEAST	0	30251000	0	0	0	0	0	28025000	0	0	0	0	0	44252000	29944000	0	0	0	0	32480000	0	0	0	0
sp|P40970|LCB2_YEAST	LCB2	sp|P40970|LCB2_YEAST	54743000	60675000	0	31074000	40362000	0	44753000	28351000	27966000	30776000	28348000	31617000	61898000	155740000	82212000	76840000	57312000	31408000	48012000	114720000	56687000	68141000	58442000	43161000
sp|P40986|CDC1_YEAST	CDC1	sp|P40986|CDC1_YEAST	0	0	61205000	104030000	138780000	190040000	0	32699000	0	70299000	96713000	159090000	0	0	19923000	106720000	266190000	271690000	23148000	0	63786000	89726000	153850000	138740000
sp|P40989|FKS2_YEAST	FKS2	sp|P40989|FKS2_YEAST	142940000	675840000	374880000	411070000	528180000	546090000	95470000	573200000	335260000	336810000	440230000	657530000	171150000	521870000	338220000	356090000	499620000	438800000	123970000	592740000	371840000	326620000	334990000	279980000
sp|P40990|MSS2_YEAST	MSS2	sp|P40990|MSS2_YEAST	0	0	0	0	0	0	0	0	0	0	0	0	0	0	0	0	0	0	0	0	0	0	0	5104700
sp|P40991|NOP2_YEAST	NOP2	sp|P40991|NOP2_YEAST	0	43469000	199500000	59646000	0	0	77502000	35488000	90567000	77214000	24731000	0	0	0	162470000	33469000	0	0	65249000	36450000	70850000	39736000	0	0
sp|P41056|RL33B_YEAST	RL33B	sp|P41056|RL33B_YEAST	0	0	239440000	1485300000	0	0	0	0	149320000	1818300000	1297900000	2564600000	0	0	111920000	833030000	0	0	0	0	152710000	662190000	0	1534100000
sp|P41057|RS29A_YEAST	RS29A	sp|P41057|RS29A_YEAST	76114000	157140000	0	347530000	565520000	1567200000	0	182370000	0	895440000	437190000	1536600000	0	79609000	47525000	1143800000	988070000	2021900000	0	0	0	435740000	637270000	2022700000
sp|P41058|RS29B_YEAST	RS29B	sp|P41058|RS29B_YEAST	0	1826900000	94572000	1000300000	1179500000	2285100000	0	340820000	42795000	1040200000	1123500000	2385100000	0	53384000	79574000	474420000	860950000	1207500000	0	396740000	173010000	651470000	851460000	1858100000
sp|P41277|GPP1_YEAST;sp|P40106|GPP2_YEAST	GPP1	sp|P41277|GPP1_YEAST	88664000	24022000	26903000	19581000	0	17172000	99957000	31667000	0	0	0	21660000	33443000	21412000	0	17318000	0	0	30769000	0	0	0	0	0
sp|P41338|THIL_YEAST	THIL	sp|P41338|THIL_YEAST	556190000	492750000	367030000	145840000	127350000	111140000	617680000	562340000	129600000	207420000	127710000	150890000	518230000	445270000	332020000	191130000	78916000	74684000	340720000	299410000	203490000	112400000	81355000	71811000
sp|P41543|OST1_YEAST	OST1	sp|P41543|OST1_YEAST	33198000	176130000	92543000	110330000	122880000	191240000	43782000	44014000	0	98372000	123280000	239190000	39378000	44041000	39538000	97190000	162260000	128250000	49745000	40766000	26918000	93998000	107840000	94186000
sp|P41696|AZF1_YEAST	AZF1	sp|P41696|AZF1_YEAST	0	0	0	0	0	0	0	0	0	0	0	0	0	0	0	0	0	0	0	0	0	0	0	23213000
sp|P41733|CDC91_YEAST	CDC91	sp|P41733|CDC91_YEAST	0	16088000	17121000	0	0	26610000	0	12895000	0	0	0	0	0	20719000	16692000	20031000	34343000	0	0	18529000	25976000	0	0	25731000
sp|P41734|IAH1_YEAST	IAH1	sp|P41734|IAH1_YEAST	0	0	0	0	0	0	0	0	0	0	0	0	0	0	0	0	0	0	6300700	0	0	0	0	0
sp|P41805|RL10_YEAST	RL10	sp|P41805|RL10_YEAST	100810000	345090000	2265900000	17410000000	12905000000	26040000000	84848000	479960000	3024000000	18581000000	14011000000	19705000000	58668000	319190000	3612200000	10446000000	16596000000	19792000000	65469000	439200000	2329900000	10376000000	10622000000	21707000000
sp|P41807|VATH_YEAST	VATH	sp|P41807|VATH_YEAST	227630000	74001000	76864000	91933000	177720000	485760000	210350000	62097000	30217000	66213000	113320000	234340000	220830000	153800000	125940000	163670000	288460000	464690000	271080000	211700000	200250000	231110000	329500000	461240000
sp|P41810|COPB_YEAST	COPB	sp|P41810|COPB_YEAST	145450000	0	88916000	71842000	67056000	53269000	145590000	37247000	52699000	81145000	83676000	57084000	118980000	40731000	60436000	152610000	91540000	76949000	148990000	89718000	113920000	129870000	71700000	67381000
sp|P41811|COPB2_YEAST	COPB2	sp|P41811|COPB2_YEAST	196010000	196850000	96674000	103670000	98771000	73087000	187710000	260900000	105810000	118280000	94006000	66614000	235750000	341690000	259130000	169050000	112540000	117640000	241750000	297310000	240770000	186780000	112140000	103240000
sp|P41835|THI6_YEAST	THI6	sp|P41835|THI6_YEAST	25506000	0	0	0	0	0	19442000	3603700	0	0	0	0	18183000	0	0	8532800	0	0	14193000	0	0	7392700	0	0
sp|P41895|T2FA_YEAST	T2FA	sp|P41895|T2FA_YEAST	0	0	0	0	0	0	19143000	0	0	0	0	0	30889000	0	0	0	0	0	0	0	0	0	0	0
sp|P41901|SPR3_YEAST	SPR3	sp|P41901|SPR3_YEAST	0	47033000	38181000	28418000	31912000	28409000	15839000	47253000	0	28885000	44525000	53839000	0	100780000	109160000	75019000	38805000	18982000	0	66961000	50012000	46146000	42299000	30241000
sp|P41903|PTE1_YEAST	PTE1	sp|P41903|PTE1_YEAST	84935000	0	27089000	0	0	40475000	74201000	26237000	0	0	0	0	50395000	0	0	0	0	32894000	45629000	0	0	0	0	0
sp|P41909|PXA1_YEAST	PXA1	sp|P41909|PXA1_YEAST	7166200	26971000	10012000	19181000	0	0	0	23890000	0	18519000	0	0	0	38207000	12215000	11022000	0	20992000	0	36940000	14876000	0	0	0
sp|P41911|GPD2_YEAST	GPD2	sp|P41911|GPD2_YEAST	127120000	0	0	0	9472400	13624000	120330000	32488000	0	0	10606000	0	249760000	63968000	10744000	22170000	36167000	0	212290000	31077000	23356000	26683000	21732000	21010000
sp|P41920|YRB1_YEAST	YRB1	sp|P41920|YRB1_YEAST	44646000	61818000	33007000	0	0	0	48022000	0	0	0	0	0	103920000	93951000	62514000	0	0	0	26104000	31213000	0	0	0	0
sp|P41921|GSHR_YEAST	GSHR	sp|P41921|GSHR_YEAST	313080000	216390000	0	41930000	0	0	377380000	183950000	0	114970000	0	0	479980000	106860000	0	58574000	41351000	0	791010000	79592000	0	58796000	0	0
sp|P41939|IDHC_YEAST	IDHC	sp|P41939|IDHC_YEAST	3619300000	1811800000	1321300000	763940000	819390000	660170000	3441800000	1487400000	919000000	748610000	869170000	857950000	2705400000	1295500000	1100100000	724300000	526730000	448940000	2302200000	1212700000	973610000	670050000	607950000	532190000
sp|P41940|MPG1_YEAST	MPG1	sp|P41940|MPG1_YEAST	334530000	199990000	135960000	75653000	78926000	57878000	314940000	159040000	121380000	88560000	91005000	95591000	349300000	287080000	242200000	172440000	129780000	116830000	335700000	238840000	199960000	140710000	128910000	116890000
sp|P41948|MEP2_YEAST	MEP2	sp|P41948|MEP2_YEAST	12786000	0	0	0	0	51554000	0	14920000	0	0	0	0	0	7704200	0	0	0	0	0	0	0	0	0	0
sp|P42826|XKS1_YEAST	XKS1	sp|P42826|XKS1_YEAST	24530000	0	0	0	0	0	30777000	0	0	0	0	0	35294000	0	0	0	0	0	27012000	0	0	0	0	0
sp|P42838|LEM3_YEAST	LEM3	sp|P42838|LEM3_YEAST	0	0	0	0	0	0	0	0	0	0	0	0	0	0	0	0	0	21612000	0	0	0	0	0	0
sp|P42839|VNX1_YEAST	VNX1	sp|P42839|VNX1_YEAST	0	229790000	328710000	154090000	215920000	257200000	0	187230000	160290000	104810000	150240000	279470000	0	197740000	225370000	136490000	228090000	187460000	61005000	255590000	309970000	189320000	227190000	246600000
sp|P42842|EMW1_YEAST	EMW1	sp|P42842|EMW1_YEAST	0	0	646160000	0	0	0	0	0	0	0	0	0	0	0	0	0	0	0	0	0	0	0	0	0
sp|P42846|KRI1_YEAST	KRI1	sp|P42846|KRI1_YEAST	0	85050000	68350000	61342000	43259000	34642000	0	88139000	149840000	95494000	53551000	51628000	0	61617000	130080000	89596000	38360000	35143000	0	60734000	117910000	76541000	32119000	0
sp|P42847|RT18_YEAST	RT18	sp|P42847|RT18_YEAST	0	110510000	53138000	135580000	190010000	56708000	0	111560000	0	130970000	305280000	46842000	0	101610000	51646000	106590000	180640000	100150000	0	159420000	0	109830000	200910000	139050000
sp|P42900|SLS1_YEAST	SLS1	sp|P42900|SLS1_YEAST	0	0	0	0	0	0	0	0	0	0	0	0	0	0	0	0	0	0	2605500	0	0	0	0	0
sp|P42934|PMT6_YEAST	PMT6	sp|P42934|PMT6_YEAST	0	0	0	0	0	0	0	25758000	0	0	48719000	0	0	0	0	0	0	0	0	0	0	0	0	0
sp|P42938|TDA10_YEAST	TDA10	sp|P42938|TDA10_YEAST	4589400	0	0	0	0	0	9996400	0	0	0	0	0	22996000	0	0	0	0	0	20587000	0	0	3835100	0	0
sp|P42940|ETFB_YEAST	ETFB	sp|P42940|ETFB_YEAST	75623000	0	0	0	0	0	112400000	0	0	0	0	0	0	0	0	0	0	0	45549000	0	0	0	0	0
sp|P42943|TCPH_YEAST	TCPH	sp|P42943|TCPH_YEAST	84636000	156310000	45964000	0	0	0	125100000	213960000	56991000	34708000	23180000	0	52459000	113550000	38100000	0	34651000	0	97113000	92510000	31387000	22802000	0	0
sp|P42945|UTP10_YEAST	UTP10	sp|P42945|UTP10_YEAST	0	14464000	51048000	841160000	189690000	49516000	0	8920000	26552000	1222600000	334590000	74075000	0	0	109870000	926640000	131500000	13311000	0	9894200	35198000	914740000	204130000	28782000
sp|P42949|TIM16_YEAST	TIM16	sp|P42949|TIM16_YEAST	67814000	0	0	0	0	0	82230000	0	0	17468000	0	0	0	0	0	0	0	0	38900000	0	0	0	0	0
sp|P43122|QRI7_YEAST	QRI7	sp|P43122|QRI7_YEAST	18684000	0	0	0	0	0	21429000	0	0	0	0	0	0	0	0	0	0	0	0	0	0	0	0	0
sp|P43123|UAP1_YEAST	UAP1	sp|P43123|UAP1_YEAST	149640000	13502000	8223600	5471400	0	6550900	105800000	13108000	0	6398900	0	0	51642000	18404000	0	4671800	4721000	0	63857000	13139000	0	0	5662300	0
sp|P43132|BRE2_YEAST	BRE2	sp|P43132|BRE2_YEAST	0	0	0	0	0	0	0	0	0	0	0	0	10380000	0	0	0	0	0	0	0	0	0	0	0
sp|P43321|SMD3_YEAST	SMD3	sp|P43321|SMD3_YEAST	0	0	0	0	0	0	0	0	0	0	0	0	0	0	0	0	0	0	0	0	0	0	0	4483400
sp|P43535|GCN20_YEAST	GCN20	sp|P43535|GCN20_YEAST	22646000	0	0	0	0	0	29247000	0	0	0	0	0	0	11775000	0	0	0	0	18514000	0	0	0	0	0
sp|P43550|DAK2_YEAST	DAK2	sp|P43550|DAK2_YEAST	34215000	0	0	0	0	0	53990000	6712000	0	0	0	0	0	0	0	0	0	0	0	0	0	0	0	0
sp|P43555|EMP47_YEAST	EMP47	sp|P43555|EMP47_YEAST	59593000	118830000	119280000	117830000	85994000	96447000	50996000	141970000	94383000	93499000	83943000	142350000	0	86156000	89043000	73050000	157560000	147340000	58218000	71465000	102200000	73929000	75948000	70179000
sp|P43557|FMP32_YEAST	FMP32	sp|P43557|FMP32_YEAST	0	0	0	0	0	58840000	0	0	0	0	0	0	0	0	0	0	0	0	0	0	0	19388000	34842000	23286000
sp|P43558|OTU1_YEAST	OTU1	sp|P43558|OTU1_YEAST	0	0	0	0	0	0	0	0	0	0	0	0	0	0	0	0	0	0	26589000	0	0	0	0	0
sp|P43561|FET5_YEAST	FET5	sp|P43561|FET5_YEAST	52899000	65750000	50607000	39670000	0	0	54700000	67586000	0	44728000	36439000	0	63317000	80585000	74806000	39241000	47559000	24290000	58890000	99134000	49929000	35265000	37873000	42169000
sp|P43567|AGX1_YEAST	AGX1	sp|P43567|AGX1_YEAST	173280000	307030000	233190000	99303000	118420000	124680000	201300000	213310000	163890000	156680000	142990000	120650000	110860000	188950000	177450000	113220000	83929000	106110000	107630000	209630000	113670000	132420000	96237000	105300000
sp|P43569|CAF16_YEAST	CAF16	sp|P43569|CAF16_YEAST	15479000	0	0	0	0	0	16442000	0	0	0	0	0	16815000	0	0	0	0	0	15361000	0	0	0	0	0
sp|P43577|GNA1_YEAST	GNA1	sp|P43577|GNA1_YEAST	17819000	0	0	0	0	0	0	0	0	0	0	0	15975000	0	0	0	0	0	15261000	0	0	0	0	0
sp|P43585|VTC2_YEAST	VTC2	sp|P43585|VTC2_YEAST	55076000	106520000	95396000	74964000	71919000	90114000	66846000	110210000	110160000	68270000	88614000	88895000	71418000	54173000	68393000	58789000	84181000	79529000	57830000	85970000	70803000	48696000	76951000	69611000
sp|P43586|LOC1_YEAST	LOC1	sp|P43586|LOC1_YEAST	0	111260000	732830000	269870000	156590000	0	0	69136000	612440000	322610000	262370000	110860000	0	45477000	570820000	183490000	105220000	20895000	0	95786000	474300000	189400000	122560000	22554000
sp|P43587|YPI1_YEAST	YPI1	sp|P43587|YPI1_YEAST	0	0	0	0	0	0	0	0	0	0	0	0	0	0	0	0	0	0	5024700	0	0	0	0	0
sp|P43588|RPN11_YEAST	RPN11	sp|P43588|RPN11_YEAST	179590000	220110000	0	30867000	16246000	29038000	165750000	260480000	64487000	34477000	26999000	0	102970000	338880000	70834000	28066000	21577000	56324000	124050000	285050000	56720000	19371000	0	29085000
sp|P43590|YFH6_YEAST	YFH6	sp|P43590|YFH6_YEAST	0	21917000	0	14059000	13608000	0	0	13247000	0	15658000	0	0	0	0	0	22467000	20924000	23210000	0	40795000	24044000	0	17568000	0
sp|P43591|YFH7_YEAST	YFH7	sp|P43591|YFH7_YEAST	140240000	0	0	0	0	0	129740000	0	0	0	0	0	0	0	0	0	0	0	119780000	0	0	0	0	0
sp|P43593|UBP6_YEAST	UBP6	sp|P43593|UBP6_YEAST	257140000	33250000	31370000	0	0	0	328610000	0	0	13927000	0	0	297290000	19370000	25468000	11371000	0	0	209770000	0	0	9924900	0	0
sp|P43597|YFI6_YEAST	YFI6	sp|P43597|YFI6_YEAST	0	0	0	0	0	0	0	0	0	0	0	0	0	0	0	0	0	0	0	133790000	0	0	0	0
sp|P43603|LSB3_YEAST	LSB3	sp|P43603|LSB3_YEAST	37569000	0	0	0	0	0	41192000	10246000	0	0	0	0	43416000	0	0	0	0	0	42373000	0	0	0	0	0
sp|P43607|RRT5_YEAST	RRT5	sp|P43607|RRT5_YEAST	23415000	0	0	0	0	0	14341000	0	0	0	0	0	27783000	0	0	11757000	0	51511000	0	0	0	0	0	0
sp|P43609|RSC8_YEAST	RSC8	sp|P43609|RSC8_YEAST	8408200	0	0	0	0	0	13040000	0	0	0	0	0	13754000	0	0	0	0	0	9116400	0	0	0	0	0
sp|P43610|IRC5_YEAST	IRC5	sp|P43610|IRC5_YEAST	0	0	0	0	0	0	0	0	0	0	0	0	0	0	0	0	0	0	54621000	0	0	0	0	0
sp|P43613|ERJ5_YEAST	ERJ5	sp|P43613|ERJ5_YEAST	0	0	0	50945000	87311000	197500000	0	0	0	55065000	87661000	131150000	0	18973000	65187000	92742000	135450000	375660000	0	0	0	71071000	119700000	288380000
sp|P43614|KEG1_YEAST	KEG1	sp|P43614|KEG1_YEAST	0	0	0	0	0	0	0	0	0	0	0	0	0	0	0	0	0	0	0	0	0	0	20848000	0
sp|P43616|DUG1_YEAST	DUG1	sp|P43616|DUG1_YEAST	421330000	309650000	75680000	126710000	70583000	95624000	549540000	200800000	63882000	134080000	123360000	89414000	269830000	218740000	122430000	140520000	56004000	69356000	186890000	155180000	73874000	124790000	60874000	65161000
sp|P43619|NADC_YEAST	NADC	sp|P43619|NADC_YEAST	0	0	0	0	0	0	0	0	0	0	0	0	0	0	0	0	0	0	3246500	0	0	0	0	0
sp|P43621|COPD_YEAST	COPD	sp|P43621|COPD_YEAST	53923000	0	0	0	0	18492000	74124000	0	0	0	0	0	104750000	0	0	0	0	0	57713000	38713000	0	0	0	0
sp|P43623|METC_YEAST	METC	sp|P43623|METC_YEAST	0	0	0	0	0	0	54531000	0	0	0	0	0	65888000	0	24303000	0	0	0	50574000	0	0	0	0	0
sp|P43635|CISY3_YEAST	CISY3	sp|P43635|CISY3_YEAST	612520000	169150000	77455000	78188000	68854000	62018000	563870000	124540000	0	77305000	73519000	96139000	801040000	232550000	220600000	168330000	118510000	159440000	910670000	283100000	162460000	184310000	169900000	203210000
sp|P43636|ALG2_YEAST	ALG2	sp|P43636|ALG2_YEAST	29454000	63335000	66063000	72296000	43294000	55410000	67181000	83794000	50843000	57003000	59781000	66436000	75767000	86009000	97522000	77453000	103830000	93625000	41345000	87549000	102530000	84899000	87688000	83770000
sp|P43639|CSK2B_YEAST	CSK2B	sp|P43639|CSK2B_YEAST	26891000	0	0	0	0	0	24586000	27122000	0	0	0	0	29324000	0	0	0	0	0	25457000	0	0	0	0	0
sp|P45818|ROK1_YEAST	ROK1	sp|P45818|ROK1_YEAST	0	0	107500000	497430000	139540000	103830000	0	64114000	110510000	628050000	140030000	107140000	0	0	90029000	441870000	82019000	0	0	0	68995000	640190000	87582000	0
sp|P46151|MTHR1_YEAST	MTHR1	sp|P46151|MTHR1_YEAST	23356000	0	0	0	0	0	28502000	0	0	0	0	0	40637000	0	0	0	0	0	33423000	0	0	0	0	0
sp|P46367|ALDH4_YEAST	ALDH4	sp|P46367|ALDH4_YEAST	5168200000	3875600000	1461600000	1825000000	1783100000	1366100000	5087100000	4410100000	2226100000	1834200000	1862400000	1647000000	6613900000	3811300000	3193200000	2428700000	1419700000	1409500000	4109300000	3165300000	2188000000	2034800000	1544900000	1303500000
sp|P46654|RSSA2_YEAST	RSSA2	sp|P46654|RSSA2_YEAST	0	17668000	42148000	1281300000	1180200000	1175000000	0	63028000	0	690700000	846020000	1541400000	0	0	25387000	735860000	596770000	954870000	0	91281000	0	740820000	908060000	1271500000
sp|P46655|SYEC_YEAST	SYEC	sp|P46655|SYEC_YEAST	1143400000	176450000	29755000	65497000	46402000	48736000	1267600000	204310000	13670000	95577000	80075000	60069000	1444000000	175590000	94478000	116620000	39513000	48310000	1280900000	139990000	30153000	88416000	41308000	27385000
sp|P46672|G4P1_YEAST	G4P1	sp|P46672|G4P1_YEAST	352440000	392640000	97057000	18071000	0	19610000	738790000	25280000	39488000	47437000	18644000	25407000	264160000	115030000	0	24875000	0	15916000	347170000	15613000	22351000	23170000	0	20800000
sp|P46673|NUP85_YEAST	NUP85	sp|P46673|NUP85_YEAST	8292900	0	0	0	0	0	9452700	9474300	0	0	0	0	9573500	9215100	0	0	0	0	9448300	0	0	0	0	0
sp|P46680|AIP1_YEAST	AIP1	sp|P46680|AIP1_YEAST	81674000	0	0	41119000	43625000	0	66758000	0	0	47395000	45219000	0	72585000	38676000	0	63973000	56203000	52096000	58460000	0	0	50044000	49405000	0
sp|P46681|DLD2_YEAST	DLD2	sp|P46681|DLD2_YEAST	55003000	70119000	34953000	0	25771000	0	53141000	73825000	0	0	23254000	0	34784000	0	28613000	0	0	0	23047000	42876000	33694000	0	14282000	0
sp|P46683|YAR1_YEAST	YAR1	sp|P46683|YAR1_YEAST	0	0	0	0	0	0	36380000	0	0	0	0	0	0	0	0	0	0	0	0	0	0	0	0	0
sp|P46943|GUF1_YEAST	GUF1	sp|P46943|GUF1_YEAST	12916000	0	0	0	0	0	10704000	0	0	0	0	0	4347400	0	0	0	0	0	6370300	0	0	0	0	0
sp|P46951|YPP1_YEAST	YPP1	sp|P46951|YPP1_YEAST	13945000	0	0	0	0	0	0	28201000	0	0	0	0	0	43376000	24617000	0	0	0	15383000	68467000	28039000	0	25743000	0
sp|P46956|PHO86_YEAST	PHO86	sp|P46956|PHO86_YEAST	21921000	0	7921300	35773000	51056000	83106000	53467000	0	0	32698000	55012000	84041000	39660000	0	0	45849000	84056000	94878000	53476000	0	0	40397000	63374000	57533000
sp|P46959|TRM61_YEAST	TRM61	sp|P46959|TRM61_YEAST	0	0	0	0	0	0	0	0	0	0	0	0	0	0	0	0	0	0	0	0	0	0	0	0
sp|P46964|OST2_YEAST	OST2	sp|P46964|OST2_YEAST	0	0	0	28977000	41361000	43514000	0	0	0	30789000	47993000	64122000	0	0	0	31999000	47345000	43201000	0	0	0	0	32358000	32427000
sp|P46965|SPC1_YEAST	SPC1	sp|P46965|SPC1_YEAST	0	37464000	0	0	31568000	38254000	10109000	20175000	0	17833000	36982000	44123000	0	18790000	19947000	16444000	32612000	32254000	0	24052000	0	13274000	19435000	0
sp|P46969|RPE_YEAST	RPE	sp|P46969|RPE_YEAST	91741000	0	0	0	0	0	103530000	0	0	0	0	0	84734000	0	0	0	0	0	87265000	0	0	0	0	0
sp|P46971|PMT4_YEAST	PMT4	sp|P46971|PMT4_YEAST	6165200	110700000	122650000	153620000	474830000	802740000	0	73645000	0	54073000	248410000	381610000	15363000	67533000	38606000	205040000	780560000	735350000	35905000	216940000	157370000	265760000	587540000	451320000
sp|P46985|MNN11_YEAST	MNN11	sp|P46985|MNN11_YEAST	24969000	133760000	97700000	119310000	229430000	354570000	0	74744000	0	79318000	160200000	222400000	0	118730000	104080000	153020000	357440000	355710000	0	162240000	151830000	166400000	324520000	261350000
sp|P46989|ATG27_YEAST	ATG27	sp|P46989|ATG27_YEAST	14204000	0	0	70009000	45788000	44510000	13401000	0	0	46289000	80290000	49791000	0	0	0	40347000	104000000	0	13490000	0	0	38884000	49118000	0
sp|P46990|RL17B_YEAST	RL17B	sp|P46990|RL17B_YEAST	0	0	2647500000	17484000000	19420000000	40447000000	0	19557000	2327400000	15059000000	12470000000	27722000000	0	0	2074700000	9081500000	16234000000	20368000000	6403100	0	2347400000	11528000000	17613000000	24711000000
sp|P46992|YJR1_YEAST	YJR1	sp|P46992|YJR1_YEAST	20375000	0	0	32657000	159240000	481510000	50572000	0	0	30401000	129460000	245360000	39953000	0	18241000	58185000	173590000	439120000	44593000	0	50235000	100920000	176260000	374360000
sp|P47008|SFH5_YEAST	SFH5	sp|P47008|SFH5_YEAST	0	0	0	0	0	0	0	0	0	0	0	0	0	0	0	0	0	0	0	0	0	0	0	3686100
sp|P47018|MTC1_YEAST	MTC1	sp|P47018|MTC1_YEAST	107750000	0	0	22950000	0	15243000	85705000	0	0	0	0	0	45373000	0	0	0	0	0	37965000	0	0	26502000	0	0
sp|P47031|IML2_YEAST	IML2	sp|P47031|IML2_YEAST	53096000	0	0	0	0	0	50877000	0	0	0	0	0	0	32540000	0	0	0	0	34677000	0	0	0	0	0
sp|P47037|SMC3_YEAST	SMC3	sp|P47037|SMC3_YEAST	31030000	0	0	0	0	0	26677000	13987000	0	0	0	0	70459000	12043000	0	0	0	0	92148000	0	0	0	0	0
sp|P47039|BNA3_YEAST	BNA3	sp|P47039|BNA3_YEAST	0	0	0	0	0	0	0	0	0	0	0	0	0	0	0	0	0	0	9666300	0	0	0	0	0
sp|P47042|IKS1_YEAST	IKS1	sp|P47042|IKS1_YEAST	17319000	40688000	59856000	94551000	143830000	323960000	0	50487000	0	51565000	82941000	90710000	12681000	24126000	53852000	118350000	440070000	423300000	10575000	25499000	52708000	151820000	331340000	190850000
sp|P47044|YJF5_YEAST	YJF5	sp|P47044|YJF5_YEAST	86580000	0	0	0	0	0	98066000	0	0	0	0	0	43389000	0	0	0	0	0	44286000	0	0	0	0	0
sp|P47045|TIM54_YEAST	TIM54	sp|P47045|TIM54_YEAST	30523000	125160000	80514000	91190000	69738000	114160000	40995000	128880000	68937000	79875000	148030000	188750000	0	21178000	34779000	0	37157000	51472000	0	35793000	0	33692000	34656000	27008000
sp|P47047|MTR4_YEAST	MTR4	sp|P47047|MTR4_YEAST	8887300	0	0	0	0	0	8650200	0	0	0	0	0	9764100	0	0	0	0	0	7389200	0	0	0	0	0
sp|P47051|LPLA_YEAST	LPLA	sp|P47051|LPLA_YEAST	0	0	0	0	0	0	0	0	0	0	0	6448600	0	0	0	0	0	0	0	0	0	0	0	0
sp|P47052|SDHX_YEAST	SDHX	sp|P47052|SDHX_YEAST	18941000	0	0	0	0	0	18314000	30258000	0	16914000	0	0	23510000	11561000	0	0	0	0	15934000	0	0	0	0	0
sp|P47054|NU192_YEAST	NU192	sp|P47054|NU192_YEAST	12962000	13234000	0	0	0	0	0	11662000	0	0	0	0	0	16691000	0	0	0	0	9228800	13737000	0	0	0	0
sp|P47057|SNX4_YEAST	SNX4	sp|P47057|SNX4_YEAST	0	0	470700000	0	0	0	0	0	895270000	0	0	0	0	0	556730000	0	0	0	0	0	405350000	0	0	0
sp|P47061|VPS53_YEAST	VPS53	sp|P47061|VPS53_YEAST	0	0	0	0	0	0	0	0	0	0	0	0	0	0	0	0	0	0	2599600	0	0	0	0	0
sp|P47064|AP3S_YEAST	AP3S	sp|P47064|AP3S_YEAST	0	0	0	0	0	0	0	0	0	0	0	0	0	0	0	0	0	0	5592000	0	0	0	0	0
sp|P47068|BBC1_YEAST	BBC1	sp|P47068|BBC1_YEAST	46261000	0	0	0	0	0	41790000	0	0	0	0	0	63279000	0	0	0	0	0	53449000	0	0	0	0	0
sp|P47069|MPS3_YEAST	MPS3	sp|P47069|MPS3_YEAST	0	0	0	9695800	23622000	29557000	0	0	0	18207000	0	0	0	0	0	24805000	31097000	28998000	0	0	0	22790000	0	0
sp|P47075|VTC4_YEAST	VTC4	sp|P47075|VTC4_YEAST	114360000	221890000	94993000	117490000	146950000	152090000	121650000	317020000	135360000	151690000	159750000	192520000	137320000	173600000	156100000	175150000	252760000	293830000	94910000	234120000	202580000	158320000	248510000	195300000
sp|P47076|RPC9_YEAST	RPC9	sp|P47076|RPC9_YEAST	0	0	0	0	0	0	0	9339400	0	0	0	0	0	0	0	0	0	0	0	0	0	0	0	0
sp|P47079|TCPQ_YEAST	TCPQ	sp|P47079|TCPQ_YEAST	226450000	199150000	69811000	62176000	47268000	55433000	133940000	198140000	106540000	79565000	86689000	0	112790000	152320000	63129000	48139000	0	40227000	97019000	128860000	126590000	98165000	84199000	0
sp|P47081|COX16_YEAST	COX16	sp|P47081|COX16_YEAST	0	32783000	26599000	32012000	30005000	60808000	0	31124000	0	0	0	0	0	25938000	27215000	0	0	0	0	25771000	0	0	0	0
sp|P47083|MPP10_YEAST	MPP10	sp|P47083|MPP10_YEAST	25341000	0	87531000	562110000	99206000	16313000	0	0	0	513290000	170960000	10882000	0	10038000	163790000	998910000	72371000	0	0	24331000	30983000	596700000	91432000	5873400
sp|P47085|YJX8_YEAST	YJX8	sp|P47085|YJX8_YEAST	14554000	0	0	0	0	0	0	0	0	0	0	0	0	0	0	0	0	0	0	0	0	0	0	0
sp|P47089|DENR_YEAST	DENR	sp|P47089|DENR_YEAST	46033000	0	0	0	0	0	41232000	0	0	0	0	0	11736000	0	0	0	0	0	11012000	0	0	0	0	0
sp|P47108|URB2_YEAST	URB2	sp|P47108|URB2_YEAST	0	74676000	0	0	0	0	0	0	0	0	0	0	0	72634000	0	0	0	0	0	65999000	0	0	0	0
sp|P47116|PTK2_YEAST	PTK2	sp|P47116|PTK2_YEAST	16242000	0	0	0	0	0	16321000	0	0	0	0	0	15875000	12098000	0	0	0	0	20919000	0	0	0	0	0
sp|P47117|ARP3_YEAST	ARP3	sp|P47117|ARP3_YEAST	177770000	0	46094000	60245000	40420000	44416000	182210000	102940000	0	27285000	77510000	0	132880000	39798000	80192000	86195000	78680000	68816000	159560000	60191000	0	70331000	75981000	49846000
sp|P47119|ITPA_YEAST	ITPA	sp|P47119|ITPA_YEAST	0	0	0	0	0	0	22105000	0	0	0	0	0	0	0	0	0	0	0	29126000	0	0	0	0	0
sp|P47120|DOHH_YEAST	DOHH	sp|P47120|DOHH_YEAST	0	0	0	0	0	0	46504000	0	0	0	0	0	48146000	0	0	0	0	0	0	0	0	0	0	0
sp|P47122|NPA3_YEAST	NPA3	sp|P47122|NPA3_YEAST	35626000	0	0	0	0	0	25944000	0	0	0	0	0	19425000	27605000	24228000	23461000	19562000	0	37407000	15268000	0	0	0	0
sp|P47123|MOG1_YEAST	MOG1	sp|P47123|MOG1_YEAST	0	0	0	0	0	0	8900000	0	0	0	0	0	10406000	0	0	0	0	0	7943400	0	0	0	0	0
sp|P47124|HOC1_YEAST	HOC1	sp|P47124|HOC1_YEAST	0	0	0	0	14035000	24352000	0	0	0	0	0	0	0	0	0	0	0	0	0	0	0	0	0	0
sp|P47127|AIM24_YEAST	AIM24	sp|P47127|AIM24_YEAST	294240000	152370000	625600000	506480000	538390000	427690000	154260000	510260000	479180000	674720000	789960000	795170000	154480000	74320000	0	149080000	183620000	155480000	171930000	78877000	144400000	211560000	177180000	100920000
sp|P47131|YJ55_YEAST	YJ55	sp|P47131|YJ55_YEAST	0	0	0	0	0	14112000	0	0	0	0	0	0	0	0	0	0	7551800	7508600	0	0	0	0	0	0
sp|P47133|EMC2_YEAST	EMC2	sp|P47133|EMC2_YEAST	0	5608500	0	79250000	129710000	237630000	0	0	0	31248000	84590000	119260000	6964100	4564200	0	119110000	632680000	716310000	0	0	0	178550000	310230000	206630000
sp|P47137|YJ66_YEAST	YJ66	sp|P47137|YJ66_YEAST	48827000	0	0	0	0	0	44830000	0	0	0	0	0	46584000	0	0	0	0	0	0	0	0	0	0	0
sp|P47140|AIM25_YEAST	AIM25	sp|P47140|AIM25_YEAST	28492000	0	35090000	70286000	108630000	191660000	15975000	0	0	46980000	67489000	89193000	0	0	0	60799000	128000000	165350000	0	0	45997000	76087000	127300000	98905000
sp|P47141|RT26_YEAST	RT26	sp|P47141|RT26_YEAST	33953000	123860000	24756000	176240000	296510000	67013000	47993000	133710000	56609000	222590000	425090000	78337000	0	191040000	23864000	166100000	223190000	80523000	0	118140000	38120000	132790000	301500000	153350000
sp|P47143|ADK_YEAST	ADK	sp|P47143|ADK_YEAST	0	58316000	23912000	0	0	0	0	30319000	0	0	0	0	0	0	16204000	0	0	0	0	26547000	0	0	0	0
sp|P47150|RT07_YEAST	RT07	sp|P47150|RT07_YEAST	8211800	802170000	308130000	656340000	1186200000	218650000	0	889110000	284930000	680340000	1400100000	322260000	0	918950000	299950000	528250000	882780000	434690000	0	954230000	182340000	454720000	1034600000	662220000
sp|P47154|STE24_YEAST	STE24	sp|P47154|STE24_YEAST	54003000	310640000	164080000	245030000	344320000	420260000	41442000	289960000	201990000	207350000	371330000	805660000	102920000	254290000	265850000	265140000	344900000	339700000	144810000	269310000	140290000	191970000	248170000	240740000
sp|P47155|ILM1_YEAST	ILM1	sp|P47155|ILM1_YEAST	0	0	0	0	0	0	0	0	0	0	0	0	0	0	0	0	0	0	0	0	0	0	0	13906000
sp|P47158|CAF17_YEAST	CAF17	sp|P47158|CAF17_YEAST	0	0	0	0	0	0	0	0	0	0	0	0	0	0	0	0	0	0	461320	0	0	0	0	0
sp|P47160|ENT3_YEAST	ENT3	sp|P47160|ENT3_YEAST	0	0	0	0	0	0	17826000	0	0	0	0	0	20262000	0	0	0	0	0	20727000	0	0	0	0	0
sp|P47165|XPT1_YEAST	XPT1	sp|P47165|XPT1_YEAST	39384000	0	0	0	0	0	53627000	0	49377000	0	0	0	39700000	0	0	0	0	0	57638000	0	0	0	0	0
sp|P47169|MET5_YEAST	MET5	sp|P47169|MET5_YEAST	0	0	0	0	0	0	0	0	0	0	0	0	0	0	0	0	0	0	13062000	0	0	0	0	0
sp|P47171|HIR3_YEAST	HIR3	sp|P47171|HIR3_YEAST	0	0	0	0	0	0	0	0	0	0	0	0	0	9619500	23528000	26109000	11701000	0	0	0	0	0	0	0
sp|P47173|YJ9J_YEAST	YJ9J	sp|P47173|YJ9J_YEAST	804790000	0	0	0	0	0	788430000	0	0	0	0	0	945490000	0	0	0	0	0	845280000	0	0	0	0	0
sp|P47176|BCA2_YEAST	BCA2	sp|P47176|BCA2_YEAST	993320000	408130000	321890000	177270000	174780000	114940000	1218100000	381110000	250840000	188370000	207920000	219890000	1042200000	367620000	323690000	186030000	140970000	105120000	1193300000	329460000	288170000	172470000	160770000	154710000
sp|P47771|ALDH2_YEAST	ALDH2	sp|P47771|ALDH2_YEAST	194090000	47085000	41347000	33582000	27625000	15384000	260530000	95129000	38425000	37247000	26888000	15515000	235300000	102950000	46740000	48941000	18967000	10985000	241160000	39331000	0	29193000	10654000	24090000
sp|P47818|CCC1_YEAST	CCC1	sp|P47818|CCC1_YEAST	28521000	41356000	0	0	16970000	0	0	22799000	0	0	0	0	14166000	0	22473000	0	0	0	0	0	0	0	0	0
sp|P47912|LCF4_YEAST	LCF4	sp|P47912|LCF4_YEAST	392370000	137730000	238680000	179340000	161200000	162390000	533290000	139010000	61429000	189810000	165890000	113000000	405270000	247840000	204140000	268610000	211480000	188170000	413410000	194350000	216320000	216010000	208240000	153920000
sp|P48015|GCST_YEAST	GCST	sp|P48015|GCST_YEAST	18726000	0	0	16206000	16467000	0	15620000	0	0	20088000	20834000	0	0	0	0	17694000	0	16868000	0	0	0	0	16305000	18922000
sp|P48164|RS7B_YEAST	RS7B	sp|P48164|RS7B_YEAST	0	1064800000	434670000	6118600000	5298200000	8436600000	0	866110000	353030000	6900000000	5584800000	8936100000	0	867670000	458970000	2904400000	3717000000	6561800000	0	1131800000	336870000	3165200000	3533800000	7272500000
sp|P48234|NOL10_YEAST	NOL10	sp|P48234|NOL10_YEAST	0	0	53757000	217310000	50801000	0	59854000	22959000	56416000	216940000	102630000	0	0	32612000	77494000	266840000	42649000	0	0	34364000	54947000	244080000	50901000	45103000
sp|P48236|YG3L_YEAST	YG3L	sp|P48236|YG3L_YEAST	0	0	15762000	15513000	24920000	54259000	0	0	0	10207000	0	48623000	0	0	0	27507000	76082000	74917000	0	0	0	24030000	54105000	39144000
sp|P48237|CCM1_YEAST	CCM1	sp|P48237|CCM1_YEAST	0	241100000	30312000	0	0	0	0	768710000	49769000	13292000	0	0	0	67182000	0	0	0	0	0	66476000	0	0	0	0
sp|P48362|HGH1_YEAST	HGH1	sp|P48362|HGH1_YEAST	11219000	0	0	0	0	0	14103000	0	0	0	0	0	0	0	0	0	0	0	15714000	0	0	0	0	0
sp|P48365|GYP7_YEAST	GYP7	sp|P48365|GYP7_YEAST	27914000	0	0	0	0	0	33640000	0	0	0	0	0	30591000	0	0	0	0	0	29889000	0	0	0	0	0
sp|P48439|OST3_YEAST	OST3	sp|P48439|OST3_YEAST	0	192680000	129120000	91960000	129630000	120670000	0	104870000	0	79235000	141590000	214300000	34785000	135580000	127810000	115880000	194380000	189590000	0	174580000	112870000	96214000	154290000	122230000
sp|P48445|BPL1_YEAST	BPL1	sp|P48445|BPL1_YEAST	0	0	0	0	0	0	0	0	0	0	0	0	0	0	0	0	0	0	14284000	0	0	0	0	0
sp|P48526|SYIM_YEAST	SYIM	sp|P48526|SYIM_YEAST	36063000	0	0	0	0	0	29994000	0	0	0	0	0	0	0	0	0	0	0	0	0	0	0	0	0
sp|P48527|SYYM_YEAST	SYYM	sp|P48527|SYYM_YEAST	174340000	31663000	0	11774000	0	0	114420000	23803000	0	7651100	0	0	22684000	0	0	8400500	0	0	25499000	0	0	16054000	0	0
sp|P48558|BXI1_YEAST	BXI1	sp|P48558|BXI1_YEAST	0	0	0	0	58846000	79924000	0	0	0	0	42337000	61540000	0	0	0	54201000	91658000	76204000	0	0	0	0	86163000	48931000
sp|P48563|MON2_YEAST	MON2	sp|P48563|MON2_YEAST	0	18521000	0	0	0	0	0	17741000	0	0	8649800	0	0	31793000	15677000	0	0	0	0	27875000	0	0	0	0
sp|P48567|PUS4_YEAST	PUS4	sp|P48567|PUS4_YEAST	0	0	0	0	0	0	0	0	0	0	0	0	0	0	0	0	51647000	0	0	0	0	0	0	0
sp|P48582|BRO1_YEAST	BRO1	sp|P48582|BRO1_YEAST	15998000	0	0	0	0	0	23061000	0	0	0	0	0	0	0	0	0	0	0	0	0	0	0	0	0
sp|P48589|RS12_YEAST	RS12	sp|P48589|RS12_YEAST	269700000	3210500000	951230000	18825000000	16070000000	27271000000	180260000	2497100000	1247300000	21627000000	17170000000	23651000000	220770000	3490000000	1645000000	11397000000	16141000000	29004000000	223920000	4229300000	1344900000	12783000000	14761000000	28166000000
sp|P49017|COQ5_YEAST	COQ5	sp|P49017|COQ5_YEAST	37920000	0	0	14966000	0	0	51733000	0	0	0	0	0	38498000	12562000	0	15050000	0	0	47926000	0	0	0	0	0
sp|P49089|ASNS1_YEAST	ASNS1	sp|P49089|ASNS1_YEAST	16308000	16793000	0	0	0	0	27549000	0	0	0	0	0	20905000	0	0	0	0	0	13964000	15766000	0	0	0	0
sp|P49090|ASNS2_YEAST	ASNS2	sp|P49090|ASNS2_YEAST	112200000	61746000	66674000	28364000	0	0	185320000	84098000	0	31620000	31220000	37044000	98451000	89178000	55997000	51477000	0	0	97755000	74168000	53848000	37582000	31732000	0
sp|P49095|GCSP_YEAST	GCSP	sp|P49095|GCSP_YEAST	491010000	79595000	62955000	70479000	69193000	80065000	421230000	125240000	0	90070000	90645000	54138000	449740000	141240000	89960000	112430000	50885000	18128000	414070000	86915000	27634000	105670000	57485000	26404000
sp|P49166|RL37A_YEAST	RL37A	sp|P49166|RL37A_YEAST	0	0	1251200000	3115000000	2896000000	2984300000	0	0	1052600000	3460000000	2534400000	5201600000	0	0	1466800000	2197100000	2465400000	3288900000	0	0	633520000	1698100000	2576500000	4380200000
sp|P49167|RL38_YEAST	RL38	sp|P49167|RL38_YEAST	0	0	414100000	6260500000	4783900000	7726800000	0	0	0	6760700000	5205200000	5780100000	0	0	0	3069700000	4503500000	8291100000	0	0	0	3806200000	3668800000	8602000000
sp|P49334|TOM22_YEAST	TOM22	sp|P49334|TOM22_YEAST	18626000	28642000	79378000	151800000	194980000	224360000	42276000	54755000	0	172360000	249570000	363470000	0	19689000	0	31879000	72097000	91902000	38057000	0	0	99568000	97783000	46819000
sp|P49367|LYS4_YEAST	LYS4	sp|P49367|LYS4_YEAST	0	0	0	0	0	0	0	0	0	0	0	0	0	0	0	0	0	0	7327000	0	0	0	0	0
sp|P49435|APT1_YEAST	APT1	sp|P49435|APT1_YEAST	24993000	0	0	0	0	0	0	0	0	0	0	0	26892000	0	0	0	0	0	28725000	0	0	0	0	0
sp|P49573|CTR1_YEAST	CTR1	sp|P49573|CTR1_YEAST	0	52307000	0	0	0	60685000	0	44449000	0	0	0	47406000	0	92761000	53365000	44901000	39594000	179070000	0	142160000	72523000	46990000	64789000	186390000
sp|P49687|NU145_YEAST	NU145	sp|P49687|NU145_YEAST	15960000	15311000	13952000	0	12982000	0	13117000	0	0	12974000	9259700	0	11735000	35711000	0	0	0	0	15309000	30982000	0	9624800	11445000	0
sp|P49723|RIR4_YEAST	RIR4	sp|P49723|RIR4_YEAST	457090000	20151000	30642000	17921000	0	0	442380000	13484000	12477000	5062200	3577100	8493800	1042700000	24627000	67128000	16844000	0	12284000	788530000	21651000	9140800	16270000	2319700	0
sp|P49775|HNT2_YEAST	HNT2	sp|P49775|HNT2_YEAST	0	0	0	0	0	0	0	0	0	0	0	0	0	0	0	0	0	0	0	2375600	0	0	0	0
sp|P50085|PHB2_YEAST	PHB2	sp|P50085|PHB2_YEAST	54925000	2763400000	4156400000	2475100000	2887900000	3327600000	40013000	721780000	519120000	1086500000	2197900000	3478400000	31477000	2001100000	2766600000	1396900000	2228500000	2065500000	12397000	1779700000	2760300000	1921100000	1895100000	1438600000
sp|P50086|PSD10_YEAST	PSD10	sp|P50086|PSD10_YEAST	68440000	0	0	0	0	0	44873000	0	0	0	0	0	35994000	0	0	0	0	0	40324000	0	0	0	0	0
sp|P50087|MOS2_YEAST	MOS2	sp|P50087|MOS2_YEAST	0	0	0	9436300	0	0	0	0	0	0	0	0	0	77388000	0	0	0	0	0	0	0	0	0	0
sp|P50094|IMDH4_YEAST;sp|O42831|YA075_YEAST	IMDH4	sp|P50094|IMDH4_YEAST	63458000	0	0	0	0	0	61101000	0	0	0	0	0	71391000	0	0	0	0	0	81106000	0	0	0	0	0
sp|P50095|IMDH3_YEAST;sp|P38697|IMDH2_YEAST;sp|P39567|IMDH1_YEAST	IMDH3	sp|P50095|IMDH3_YEAST;sp|P38697|IMDH2_YEAST	334340000	63907000	25188000	28618000	13126000	3818900	243770000	38030000	0	55139000	26042000	14881000	433750000	97842000	17170000	33918000	9652300	51643000	487760000	14992000	38491000	57742000	23685000	6903000
sp|P50101|UBP15_YEAST	UBP15	sp|P50101|UBP15_YEAST	60112000	43772000	0	0	17267000	0	48317000	42402000	0	0	0	0	74516000	34792000	35668000	22823000	0	0	84388000	31190000	0	21028000	0	0
sp|P50108|MNN10_YEAST	MNN10	sp|P50108|MNN10_YEAST	0	32856000	0	67853000	63590000	128430000	0	32337000	0	26182000	64196000	52948000	0	34766000	20052000	78275000	178630000	173070000	16625000	52629000	33976000	87552000	210480000	113610000
sp|P50109|PSP2_YEAST	PSP2	sp|P50109|PSP2_YEAST	0	0	0	0	0	0	0	0	0	0	0	0	0	0	0	0	0	0	3337500	0	0	0	0	0
sp|P50278|SOL1_YEAST	SOL1	sp|P50278|SOL1_YEAST	29713000	14736000	0	0	0	0	32026000	0	0	0	0	0	37300000	0	0	0	0	0	43670000	19734000	0	0	0	0
sp|P50623|UBC9_YEAST	UBC9	sp|P50623|UBC9_YEAST	0	0	0	0	0	0	0	0	0	0	0	0	0	0	0	0	0	0	7866300	0	0	0	0	0
sp|P50861|RIB4_YEAST	RIB4	sp|P50861|RIB4_YEAST	315160000	0	0	104190000	0	32503000	320430000	0	0	130060000	31541000	218490000	414770000	0	25134000	38312000	26688000	128450000	336160000	0	0	44077000	78732000	102410000
sp|P50945|AIM37_YEAST	AIM37	sp|P50945|AIM37_YEAST	33040000	0	0	13591000	14483000	0	26995000	0	0	15248000	11592000	0	79239000	0	0	18197000	12453000	0	85094000	0	0	9844700	0	0
sp|P51401|RL9B_YEAST	RL9B	sp|P51401|RL9B_YEAST	179030000	14528000	1023900000	13861000000	11198000000	24618000000	100690000	16830000	763520000	14385000000	11809000000	21651000000	83928000	8700200	952420000	6841300000	9761900000	14410000000	48931000	33945000	1434800000	8794200000	10023000000	17488000000
sp|P51402|RL37B_YEAST	RL37B	sp|P51402|RL37B_YEAST	0	0	497880000	502340000	853180000	974210000	0	0	98509000	648370000	409480000	1266800000	0	0	95993000	432750000	412660000	727640000	0	0	0	363790000	554930000	1233900000
sp|P51534|SHE4_YEAST	SHE4	sp|P51534|SHE4_YEAST	23500000	0	0	0	0	0	0	0	0	0	0	0	28924000	0	0	0	0	0	31023000	0	0	0	0	0
sp|P51601|GCH1_YEAST	GCH1	sp|P51601|GCH1_YEAST	29151000	22692000	0	0	0	0	21518000	0	0	0	0	0	48789000	31128000	0	0	0	0	44161000	0	0	0	0	0
sp|P51996|YPT32_YEAST	YPT32	sp|P51996|YPT32_YEAST	20368000	0	0	0	0	0	19472000	0	0	0	0	0	20681000	0	0	0	0	0	18202000	0	0	0	0	0
sp|P51998|RL4P_YEAST	RL4P	sp|P51998|RL4P_YEAST	7975400	147100000	6843500000	1207100000	1170400000	101470000	7369900	77350000	4213400000	1733500000	1651900000	192560000	5986000	79971000	2740500000	536190000	904330000	328600000	10747000	41906000	741450000	528540000	1107500000	499880000
sp|P52286|SKP1_YEAST	SKP1	sp|P52286|SKP1_YEAST	111300000	51160000	38310000	0	0	0	178020000	40787000	0	0	0	0	195200000	38833000	0	0	0	0	107790000	41997000	0	0	0	0
sp|P52488|UBA2_YEAST	UBA2	sp|P52488|UBA2_YEAST	32626000	0	0	0	0	0	55726000	13692000	0	0	0	0	49494000	18535000	0	0	0	0	38579000	0	0	0	0	0
sp|P52489|KPYK2_YEAST	KPYK2	sp|P52489|KPYK2_YEAST	0	0	0	0	0	0	0	0	0	0	0	0	220060000	0	0	0	0	0	242050000	0	0	0	0	0
sp|P52593|NU188_YEAST	NU188	sp|P52593|NU188_YEAST	0	0	0	0	0	0	0	0	0	0	0	0	0	0	0	0	0	0	7028200	0	0	0	0	0
sp|P52867|PMT5_YEAST	PMT5	sp|P52867|PMT5_YEAST	0	13724000	0	0	0	19096000	0	15815000	0	0	0	17558000	0	17175000	0	0	0	0	0	0	0	0	16650000	0
sp|P52870|SC6B1_YEAST	SC6B1	sp|P52870|SC6B1_YEAST	0	0	0	0	59504000	0	0	0	0	35188000	57709000	152110000	0	0	0	0	0	0	0	0	0	0	42691000	0
sp|P52871|SC6B2_YEAST	SC6B2	sp|P52871|SC6B2_YEAST	0	0	0	0	0	0	0	0	0	0	0	0	0	0	0	0	0	0	0	0	0	0	0	70983000
sp|P52891|NUP84_YEAST	NUP84	sp|P52891|NUP84_YEAST	0	0	0	0	0	0	0	24425000	0	0	0	0	0	32346000	0	0	0	0	0	34649000	0	0	0	0
sp|P52892|ALAT_YEAST	ALAT	sp|P52892|ALAT_YEAST	0	0	0	0	0	0	0	0	0	0	0	0	0	0	0	0	0	0	14956000	0	0	0	0	0
sp|P52893|ALAM_YEAST	ALAM	sp|P52893|ALAM_YEAST	91953000	12713000	0	0	0	0	89280000	0	0	0	0	0	43426000	0	0	0	0	0	88206000	0	0	0	0	12787000
sp|P52910|ACS2_YEAST	ACS2	sp|P52910|ACS2_YEAST	1211400000	268980000	137420000	166800000	159620000	134900000	1219600000	273230000	223570000	200180000	191830000	176470000	985960000	209340000	151700000	198710000	125490000	90042000	956500000	190080000	125290000	154730000	155370000	127640000
sp|P52917|VPS4_YEAST	VPS4	sp|P52917|VPS4_YEAST	23879000	0	0	0	0	0	0	3968900	0	0	0	0	0	0	0	0	0	0	0	0	0	0	0	0
sp|P52918|MSN5_YEAST	MSN5	sp|P52918|MSN5_YEAST	0	0	0	0	0	0	0	0	0	0	0	0	0	0	0	0	0	0	11037000	0	0	0	0	0
sp|P52923|AIF1_YEAST	AIF1	sp|P52923|AIF1_YEAST	0	0	0	0	0	0	0	0	0	0	0	0	0	0	0	0	0	0	4048000	0	0	0	0	0
sp|P53011|SEH1_YEAST	SEH1	sp|P53011|SEH1_YEAST	24487000	30274000	22998000	0	19154000	0	27466000	30548000	22705000	0	0	0	0	27864000	16267000	0	0	0	25481000	36020000	0	0	0	0
sp|P53040|TAF6_YEAST	TAF6	sp|P53040|TAF6_YEAST	20562000	18033000	0	0	0	0	18822000	14237000	0	0	0	0	26128000	18191000	12326000	12941000	0	0	14542000	18421000	0	0	0	0
sp|P53043|PPT1_YEAST	PPT1	sp|P53043|PPT1_YEAST	0	0	0	0	0	0	0	0	0	0	0	0	0	0	0	0	0	0	10187000	0	0	0	0	0
sp|P53044|UFD1_YEAST	UFD1	sp|P53044|UFD1_YEAST	36597000	16191000	0	9260700	0	0	24330000	23301000	0	0	14048000	0	19044000	20941000	0	0	0	0	16982000	32263000	0	0	0	0
sp|P53045|MSMO_YEAST	MSMO	sp|P53045|MSMO_YEAST	13817000	19913000	0	0	0	0	0	27837000	0	0	0	0	0	11077000	0	0	0	0	0	0	0	0	0	0
sp|P53064|RTF1_YEAST	RTF1	sp|P53064|RTF1_YEAST	0	0	0	0	0	0	0	0	0	0	0	0	0	0	0	0	0	0	5472200	0	0	0	0	0
sp|P53066|YGZ2_YEAST	YGZ2	sp|P53066|YGZ2_YEAST	21288000	0	0	0	0	0	23882000	0	0	0	0	0	25210000	0	0	0	0	0	0	0	0	0	0	0
sp|P53068|APC10_YEAST	APC10	sp|P53068|APC10_YEAST	0	0	0	0	0	0	0	0	0	0	0	0	0	0	0	0	0	0	13142000	0	0	0	0	0
sp|P53070|MTO1_YEAST	MTO1	sp|P53070|MTO1_YEAST	21156000	0	0	0	0	0	25280000	0	0	0	0	0	0	0	0	0	0	0	0	0	0	0	0	0
sp|P53072|TAN1_YEAST	TAN1	sp|P53072|TAN1_YEAST	22091000	0	0	0	0	0	15614000	0	0	0	0	0	0	0	0	0	0	0	5729100	0	0	0	0	0
sp|P53073|EMC4_YEAST	EMC4	sp|P53073|EMC4_YEAST	0	35252000	22631000	116780000	206510000	417890000	0	0	0	39977000	97576000	234930000	0	0	0	140960000	535600000	544610000	0	28550000	61987000	163930000	725940000	334130000
sp|P53075|SHE10_YEAST	SHE10	sp|P53075|SHE10_YEAST	84484000	136010000	0	0	0	0	129310000	114680000	0	0	0	0	168570000	112630000	25961000	34504000	0	65317000	164290000	106130000	64649000	44930000	48479000	0
sp|P53076|VID30_YEAST	VID30	sp|P53076|VID30_YEAST	18285000	0	0	0	0	0	0	0	0	0	0	0	0	0	0	0	0	0	0	0	0	0	0	0
sp|P53081|GTPC1_YEAST	GTPC1	sp|P53081|GTPC1_YEAST	0	0	0	0	0	0	0	0	0	0	0	0	0	0	0	0	0	0	0	2879100	0	0	0	0
sp|P53086|KIP3_YEAST	KIP3	sp|P53086|KIP3_YEAST	0	0	0	0	0	0	0	0	0	0	0	0	3074400	0	0	0	0	0	0	0	0	0	0	0
sp|P53090|ARO8_YEAST	ARO8	sp|P53090|ARO8_YEAST	457790000	63086000	76303000	63694000	106940000	44952000	475360000	123370000	0	113400000	70347000	0	815600000	352270000	317520000	186950000	111100000	75939000	528280000	142100000	141010000	110910000	55399000	68049000
sp|P53093|YIP4_YEAST	YIP4	sp|P53093|YIP4_YEAST	0	0	0	0	0	0	0	0	0	0	0	0	0	0	0	0	0	0	0	0	0	0	29855000	0
sp|P53095|DSD1_YEAST	DSD1	sp|P53095|DSD1_YEAST	40515000	0	0	0	0	0	36730000	0	0	16166000	0	0	0	0	0	0	0	0	15688000	0	0	0	0	0
sp|P53100|YGT5_YEAST	YGT5	sp|P53100|YGT5_YEAST	0	0	0	0	0	0	0	0	0	0	0	0	0	0	0	0	0	0	4811600	0	0	0	0	0
sp|P53102|MND1_YEAST	MND1	sp|P53102|MND1_YEAST	499980000	116810000	0	45770000	46707000	50316000	467960000	124580000	0	0	0	0	652930000	168530000	0	77265000	37439000	0	591460000	115330000	104810000	36532000	0	0
sp|P53107|YRB30_YEAST	YRB30	sp|P53107|YRB30_YEAST	13081000	0	0	0	0	0	0	0	0	0	0	0	0	0	0	0	0	0	0	0	0	0	0	0
sp|P53108|YIP5_YEAST	YIP5	sp|P53108|YIP5_YEAST	0	0	0	0	0	0	0	0	0	0	0	0	0	0	0	0	0	0	0	8742600	0	0	0	0
sp|P53109|AIM14_YEAST	AIM14	sp|P53109|AIM14_YEAST	0	0	0	0	0	0	0	0	0	0	0	0	0	0	0	0	0	0	0	0	0	0	0	11486000
sp|P53112|PEX14_YEAST	PEX14	sp|P53112|PEX14_YEAST	0	0	0	31748000	18870000	18511000	0	0	0	13134000	17782000	0	0	0	0	0	18867000	20355000	0	8360800	0	16244000	0	18339000
sp|P53115|INO80_YEAST	INO80	sp|P53115|INO80_YEAST	0	105350000	0	0	0	0	0	120540000	0	0	0	0	0	54502000	0	0	0	0	32004000	52725000	0	0	0	0
sp|P53117|RRT6_YEAST	RRT6	sp|P53117|RRT6_YEAST	0	0	0	0	0	0	0	0	0	0	0	0	0	0	0	0	0	0	0	0	0	0	0	17329000
sp|P53121|FLC3_YEAST	FLC3	sp|P53121|FLC3_YEAST	0	0	0	0	0	0	0	0	0	0	0	0	0	0	0	0	0	14633000	0	0	0	0	0	0
sp|P53128|MTHR2_YEAST	MTHR2	sp|P53128|MTHR2_YEAST	20103000	0	0	0	0	0	24563000	0	0	0	0	0	27172000	0	0	0	0	0	26386000	0	0	0	0	0
sp|P53130|GPG1_YEAST	GPG1	sp|P53130|GPG1_YEAST	0	0	0	0	0	0	0	0	0	0	0	0	0	0	0	0	0	0	0	0	16363000	0	0	0
sp|P53131|PRP43_YEAST	PRP43	sp|P53131|PRP43_YEAST	11009000	0	0	0	0	0	9396900	0	0	14328000	11426000	0	13164000	0	0	14249000	0	0	18129000	0	0	0	0	0
sp|P53136|NSA1_YEAST	NSA1	sp|P53136|NSA1_YEAST	0	0	89548000	83513000	0	0	0	0	103160000	100570000	63600000	0	0	0	0	64711000	0	0	0	0	88073000	90939000	0	0
sp|P53140|RMD9_YEAST	RMD9	sp|P53140|RMD9_YEAST	16909000	580590000	42956000	99136000	29740000	0	19485000	522310000	52090000	106880000	74803000	10668000	6285200	24385000	21744000	22042000	15854000	0	41250000	20287000	5186800	18809000	18576000	24602000
sp|P53145|LSG1_YEAST	LSG1	sp|P53145|LSG1_YEAST	0	47132000	48880000	27918000	0	0	0	56076000	54258000	24850000	0	0	0	0	44205000	0	0	0	42483000	34379000	37750000	0	0	0
sp|P53152|MMS2_YEAST	MMS2	sp|P53152|MMS2_YEAST	16148000	0	0	0	0	0	20410000	0	0	0	0	0	0	0	0	0	0	0	18088000	0	0	0	0	0
sp|P53154|GUP1_YEAST	GUP1	sp|P53154|GUP1_YEAST	4893400	0	0	42246000	112640000	165800000	0	0	0	26440000	80164000	93128000	0	0	0	63225000	143880000	155150000	0	0	31489000	54796000	113420000	98212000
sp|P53156|YGI1_YEAST	YGI1	sp|P53156|YGI1_YEAST	0	76777000	67648000	51953000	105910000	167860000	0	79174000	47917000	59433000	70266000	113240000	27220000	82013000	87036000	72444000	104120000	135670000	0	62904000	54075000	66594000	119390000	124530000
sp|P53163|MNP1_YEAST	MNP1	sp|P53163|MNP1_YEAST	0	0	2529500000	313670000	433390000	182600000	0	0	225800000	303970000	295950000	38077000	0	22461000	1108000000	350830000	255810000	56986000	0	0	127320000	236440000	312010000	89088000
sp|P53164|NPY1_YEAST	NPY1	sp|P53164|NPY1_YEAST	0	0	0	0	0	0	0	0	0	0	0	10111000	0	0	0	0	0	0	0	0	0	0	0	0
sp|P53166|MRH4_YEAST	MRH4	sp|P53166|MRH4_YEAST	0	0	0	16004000	12827000	15571000	0	0	0	16118000	16343000	0	0	0	14871000	0	12815000	9204400	0	0	0	0	12395000	0
sp|P53172|SDS23_YEAST	SDS23	sp|P53172|SDS23_YEAST	7409900	0	0	0	0	0	12242000	0	0	6467400	0	0	6592900	0	0	8326400	0	7616100	11986000	0	0	8867300	0	9707300
sp|P53173|ERV14_YEAST	ERV14	sp|P53173|ERV14_YEAST	0	0	0	0	0	0	0	0	0	0	0	0	0	0	0	0	0	0	0	0	0	0	0	44432000
sp|P53184|PNC1_YEAST	PNC1	sp|P53184|PNC1_YEAST	116170000	28186000	52747000	36528000	15827000	39531000	79473000	27794000	0	8412800	36619000	24576000	91859000	45536000	0	36291000	35415000	0	130750000	30935000	0	16290000	38300000	41237000
sp|P53187|HOP2_YEAST	HOP2	sp|P53187|HOP2_YEAST	38571000	0	0	0	0	0	51619000	0	0	0	0	0	42235000	45678000	0	0	0	0	42105000	47254000	0	0	0	0
sp|P53192|GET1_YEAST	GET1	sp|P53192|GET1_YEAST	0	0	0	0	0	0	0	0	0	0	0	0	0	0	0	0	0	0	11918000	0	0	0	0	0
sp|P53199|ERG26_YEAST	ERG26	sp|P53199|ERG26_YEAST	118240000	91803000	92349000	85670000	66489000	77792000	101740000	119960000	70416000	61963000	63091000	75997000	71921000	131690000	82953000	104810000	68322000	58247000	104390000	118160000	96238000	75313000	72022000	0
sp|P53200|AML1_YEAST	AML1	sp|P53200|AML1_YEAST	51446000	20674000	0	0	0	0	38059000	0	0	0	0	0	31002000	0	0	0	0	0	30986000	0	0	0	0	0
sp|P53206|CYSK_YEAST	CYSK	sp|P53206|CYSK_YEAST	34424000	245040000	124140000	126980000	202470000	372420000	24836000	183430000	0	76190000	167390000	299850000	75596000	153880000	91917000	149750000	339990000	364170000	55715000	110690000	155990000	141360000	299780000	195930000
sp|P53207|SNU71_YEAST	SNU71	sp|P53207|SNU71_YEAST	0	0	0	0	0	0	0	0	0	0	0	0	0	0	0	0	0	0	1253900	0	0	0	0	0
sp|P53208|YG19_YEAST	YG19	sp|P53208|YG19_YEAST	0	0	0	0	0	0	0	0	0	0	0	0	14679000	0	0	0	0	0	0	0	0	0	0	0
sp|P53212|YG1D_YEAST	YG1D	sp|P53212|YG1D_YEAST	0	0	0	0	0	0	0	0	0	0	0	0	0	0	0	0	0	0	11033000	0	0	0	0	0
sp|P53220|TIM21_YEAST	TIM21	sp|P53220|TIM21_YEAST	0	0	0	31396000	0	57677000	0	0	0	0	35692000	53531000	0	0	0	0	52497000	55738000	0	0	0	24312000	49277000	39516000
sp|P53221|RL26B_YEAST;sp|P05743|RL26A_YEAST	RL26B	sp|P53221|RL26B_YEAST;sp|P05743|RL26A_YEAST	14740000	221030000	5006500000	22405000000	17919000000	31497000000	15287000	204740000	6551800000	24622000000	19408000000	31600000000	0	425510000	7607400000	14180000000	18459000000	28923000000	0	409440000	4595700000	14038000000	14589000000	28529000000
sp|P53228|TAL2_YEAST	TAL2	sp|P53228|TAL2_YEAST	343270000	102890000	39109000	0	0	0	312890000	49998000	0	0	11371000	0	152800000	34422000	17492000	0	0	0	192000000	43863000	26518000	0	0	0
sp|P53235|EIF2A_YEAST	EIF2A	sp|P53235|EIF2A_YEAST	124370000	0	20584000	11269000	29947000	13584000	132640000	13640000	0	21522000	16498000	0	128980000	9691500	0	30941000	0	0	137560000	8280500	0	0	19490000	24147000
sp|P53250|TWF1_YEAST	TWF1	sp|P53250|TWF1_YEAST	37459000	0	0	0	0	0	32447000	0	0	0	0	0	29686000	0	0	0	0	0	28592000	0	0	0	0	0
sp|P53252|PIL1_YEAST	PIL1	sp|P53252|PIL1_YEAST	1222600000	831540000	1087900000	914410000	4138500000	19102000000	1158300000	643200000	782800000	886180000	2806000000	14955000000	1885400000	652790000	799340000	938130000	5391600000	23726000000	1648700000	766170000	883840000	1190300000	6322500000	23939000000
sp|P53254|UTP22_YEAST	UTP22	sp|P53254|UTP22_YEAST	11451000	49603000	191360000	825250000	187730000	84698000	23697000	88293000	109110000	841220000	297780000	30393000	6518700	227440000	446920000	1252400000	129610000	61679000	0	150390000	192490000	1279400000	203700000	48086000
sp|P53259|PCP1_YEAST	PCP1	sp|P53259|PCP1_YEAST	0	0	0	28130000	90505000	172500000	0	0	0	0	23927000	32484000	0	0	0	0	69072000	57961000	0	0	0	27016000	105390000	43586000
sp|P53261|PESC_YEAST	PESC	sp|P53261|PESC_YEAST	0	10963000	1301200000	650130000	86130000	35768000	4904100	12778000	315780000	687210000	205310000	20444000	0	20451000	1353100000	687080000	100860000	74328000	3981100	20402000	225090000	654360000	102970000	60869000
sp|P53262|VOA1_YEAST	VOA1	sp|P53262|VOA1_YEAST	0	0	0	0	0	0	0	0	0	0	0	0	0	0	0	0	0	0	0	0	0	0	41234000	0
sp|P53264|CLD1_YEAST	CLD1	sp|P53264|CLD1_YEAST	0	0	0	0	0	0	11431000	0	0	0	0	0	0	0	11966000	0	0	0	16185000	0	0	0	0	0
sp|P53265|YG2W_YEAST	YG2W	sp|P53265|YG2W_YEAST	0	0	0	0	0	0	0	0	0	0	0	0	0	0	0	0	0	0	7421900	0	0	0	0	0
sp|P53266|SHY1_YEAST	SHY1	sp|P53266|SHY1_YEAST	38317000	33757000	91741000	104670000	235330000	558010000	0	31086000	0	73350000	130070000	313450000	0	11931000	0	58219000	147010000	161870000	0	16142000	0	65164000	130330000	124380000
sp|P53273|YG35_YEAST	YG35	sp|P53273|YG35_YEAST	0	0	0	0	0	29671000	0	0	0	0	0	0	0	0	0	0	19084000	19340000	0	0	0	0	0	0
sp|P53275|YG37_YEAST	YG37	sp|P53275|YG37_YEAST	0	0	0	0	0	0	0	0	0	0	0	0	0	0	0	0	0	0	0	0	0	0	1483600	0
sp|P53276|UTP8_YEAST	UTP8	sp|P53276|UTP8_YEAST	12738000	0	106770000	491120000	176950000	63850000	0	15028000	66681000	1010800000	214620000	94712000	0	78915000	284660000	673190000	132210000	30824000	0	0	160270000	632880000	178050000	67116000
sp|P53278|YG3A_YEAST	YG3A	sp|P53278|YG3A_YEAST	0	10502000	16996000	9431100	67635000	679950000	25554000	0	0	0	54292000	400110000	0	0	7223800	16041000	57089000	405140000	0	0	0	8817300	99621000	619670000
sp|P53292|RT35_YEAST	RT35	sp|P53292|RT35_YEAST	34353000	4188400000	752990000	1001900000	1824600000	386840000	8979700	3801400000	629650000	807700000	2139200000	661410000	0	2454900000	547570000	547600000	1111400000	418840000	0	2368000000	258550000	494800000	1368500000	632240000
sp|P53295|RBG2_YEAST	RBG2	sp|P53295|RBG2_YEAST	0	0	0	0	0	0	0	0	0	0	0	0	0	0	0	0	0	0	22688000	0	0	0	0	0
sp|P53297|PBP1_YEAST	PBP1	sp|P53297|PBP1_YEAST	63265000	0	0	0	0	0	62638000	0	0	0	0	0	90823000	0	0	0	0	0	66916000	0	0	0	0	0
sp|P53301|CRH1_YEAST	CRH1	sp|P53301|CRH1_YEAST	23464000	90956000	93701000	67166000	141410000	142790000	17941000	25997000	93535000	52079000	95714000	112260000	40137000	73885000	110210000	67583000	114020000	123720000	67597000	74205000	89824000	65365000	126170000	131860000
sp|P53305|RT27_YEAST	RT27	sp|P53305|RT27_YEAST	0	513520000	44771000	111390000	173360000	48923000	0	646150000	0	88283000	226830000	38821000	0	414190000	22645000	134890000	211980000	68140000	0	315360000	0	81098000	179940000	106690000
sp|P53312|SUCB_YEAST	SUCB	sp|P53312|SUCB_YEAST	1921700000	657180000	467940000	265660000	290940000	231260000	1734700000	570000000	407940000	259190000	300820000	384480000	1485800000	452920000	421800000	278160000	267360000	304690000	1427100000	436680000	403890000	312120000	378370000	459890000
sp|P53315|SOL4_YEAST	SOL4	sp|P53315|SOL4_YEAST	45332000	0	0	0	0	0	25383000	0	0	0	8782600	0	0	15282000	0	0	0	0	14350000	0	0	0	0	0
sp|P53316|YG5B_YEAST	YG5B	sp|P53316|YG5B_YEAST	35695000	22352000	0	0	0	0	31972000	0	0	0	0	0	42170000	26240000	0	0	0	0	52302000	16581000	0	0	0	0
sp|P53318|COQ6_YEAST	COQ6	sp|P53318|COQ6_YEAST	0	0	0	0	0	0	0	0	0	0	0	0	0	0	0	0	0	0	0	0	0	0	0	0
sp|P53319|6PGD2_YEAST	6PGD2	sp|P53319|6PGD2_YEAST	0	0	0	0	0	0	0	0	0	0	0	0	0	0	0	0	0	0	13655000	0	0	0	0	0
sp|P53324|SAY1_YEAST	SAY1	sp|P53324|SAY1_YEAST	0	19362000	0	0	16188000	0	0	19645000	0	0	0	0	0	34158000	20074000	0	14376000	0	0	20670000	0	0	0	15170000
sp|P53326|YG5L_YEAST	YG5L	sp|P53326|YG5L_YEAST	15923000	13172000	0	0	0	0	15473000	0	0	0	0	0	20959000	12932000	0	0	0	0	38476000	0	0	0	0	0
sp|P53327|SLH1_YEAST	SLH1	sp|P53327|SLH1_YEAST	0	0	0	0	0	0	0	0	0	0	0	0	0	0	0	325260000	0	0	0	0	0	0	0	0
sp|P53337|ERV29_YEAST	ERV29	sp|P53337|ERV29_YEAST	26425000	77878000	0	0	29254000	21139000	23594000	75844000	42655000	23126000	0	40409000	0	142160000	141710000	84934000	75598000	90793000	25275000	95823000	29903000	0	69210000	0
sp|P53378|TBG_YEAST	TBG	sp|P53378|TBG_YEAST	0	0	0	0	0	0	0	0	0	0	0	0	0	0	0	0	0	0	0	0	0	564820	0	0
sp|P53388|DIP5_YEAST	DIP5	sp|P53388|DIP5_YEAST	0	445600000	339490000	0	271310000	468430000	0	263500000	0	0	0	514920000	0	0	0	0	0	256410000	0	0	0	150300000	0	367630000
sp|P53507|TOM7_YEAST	TOM7	sp|P53507|TOM7_YEAST	0	0	0	0	0	0	0	0	0	0	0	0	0	0	0	0	0	0	0	0	0	0	0	3362700
sp|P53541|SPO1_YEAST	SPO1	sp|P53541|SPO1_YEAST	0	0	0	0	0	0	0	0	0	0	0	0	0	0	0	0	0	0	8265200	0	0	0	0	0
sp|P53549|PRS10_YEAST	PRS10	sp|P53549|PRS10_YEAST	392100000	605150000	101050000	118780000	70060000	129900000	406810000	420560000	0	139180000	132600000	88299000	332930000	759500000	356460000	188450000	121070000	149080000	295370000	867480000	389420000	225080000	125850000	107300000
sp|P53550|DCP2_YEAST	DCP2	sp|P53550|DCP2_YEAST	0	0	0	0	0	0	0	0	0	0	0	0	0	0	0	0	0	0	0	0	0	0	6130000	0
sp|P53551|H1_YEAST	H1	sp|P53551|H1_YEAST	0	0	41512000	218330000	226030000	52193000	0	0	0	306750000	367780000	144210000	12572000	0	0	267610000	203620000	54188000	16479000	0	82864000	215590000	248480000	60987000
sp|P53598|SUCA_YEAST	SUCA	sp|P53598|SUCA_YEAST	1296300000	439220000	198080000	179860000	180740000	136420000	1604500000	392710000	207100000	204500000	195630000	220820000	1043500000	153220000	129660000	134210000	88720000	93978000	1033700000	349370000	206320000	170680000	140920000	149240000
sp|P53600|COPZ_YEAST	COPZ	sp|P53600|COPZ_YEAST	35794000	0	0	0	0	0	33688000	0	0	0	0	0	0	0	0	0	0	0	39335000	0	0	0	0	0
sp|P53615|CAN_YEAST	CAN	sp|P53615|CAN_YEAST	140730000	29997000	0	0	0	29181000	0	0	0	0	0	0	42452000	0	0	0	0	0	0	0	0	0	0	0
sp|P53617|NRD1_YEAST	NRD1	sp|P53617|NRD1_YEAST	0	0	0	0	0	0	0	0	0	0	0	0	0	0	0	0	0	0	5499900	0	0	0	0	0
sp|P53622|COPA_YEAST	COPA	sp|P53622|COPA_YEAST	316750000	87920000	50199000	127090000	120170000	111240000	228390000	149570000	131340000	164140000	102820000	45327000	349510000	231760000	135440000	255190000	181360000	176080000	317100000	296310000	149590000	249040000	163930000	128550000
sp|P53629|ARE2_YEAST	ARE2	sp|P53629|ARE2_YEAST	51803000	35538000	29661000	45531000	49758000	67969000	32865000	50137000	41882000	26297000	33566000	91408000	29042000	0	0	46294000	68886000	62994000	41538000	28070000	0	45394000	53981000	43953000
sp|P53633|PRA1_YEAST	PRA1	sp|P53633|PRA1_YEAST	52690000	0	0	29691000	0	30541000	142830000	0	0	27640000	32171000	0	60376000	0	0	0	0	25071000	49773000	0	0	28760000	28677000	0
sp|P53691|PPID_YEAST	PPID	sp|P53691|PPID_YEAST	55573000	29073000	0	0	0	0	68253000	19039000	0	0	0	0	67775000	17265000	15132000	0	0	0	48457000	28395000	0	0	0	0
sp|P53721|RCF2_YEAST	RCF2	sp|P53721|RCF2_YEAST	0	100850000	52729000	84979000	162970000	226590000	9603900	0	45250000	52289000	39366000	136200000	39481000	319500000	282290000	739730000	2071100000	1220100000	45811000	201490000	109230000	610270000	1526000000	794320000
sp|P53723|YN8B_YEAST	YN8B	sp|P53723|YN8B_YEAST	53885000	73100000	71784000	62270000	82686000	122820000	68116000	167530000	0	51963000	162500000	210740000	166480000	34673000	76449000	69110000	113840000	146750000	96427000	44497000	49747000	65716000	77263000	83440000
sp|P53724|RM50_YEAST	RM50	sp|P53724|RM50_YEAST	0	0	3753500000	494220000	388670000	104830000	0	0	2647600000	517510000	579860000	182920000	0	35628000	1066700000	250050000	354900000	145690000	0	0	877990000	239640000	432580000	274630000
sp|P53731|ARPC2_YEAST	ARPC2	sp|P53731|ARPC2_YEAST	239090000	67655000	58214000	76375000	77915000	39725000	160420000	71023000	0	48357000	78085000	46496000	221240000	84598000	80865000	73577000	51820000	39694000	229160000	63709000	54972000	41670000	59663000	27084000
sp|P53732|RT12_YEAST	RT12	sp|P53732|RT12_YEAST	0	574760000	134530000	145910000	409220000	93274000	0	495640000	0	208730000	342650000	191660000	0	335870000	0	149980000	244930000	134020000	0	260160000	0	152660000	325810000	211960000
sp|P53733|RT19_YEAST	RT19	sp|P53733|RT19_YEAST	0	304880000	49916000	178330000	308950000	42888000	0	279820000	0	123660000	498330000	73431000	0	435470000	86042000	100800000	284510000	90381000	0	413530000	0	83740000	316480000	130160000
sp|P53736|YN8O_YEAST	YN8O	sp|P53736|YN8O_YEAST	0	0	0	35679000	49323000	58526000	0	49510000	0	44760000	58474000	0	0	0	27447000	26184000	25698000	34144000	0	0	0	23893000	27237000	0
sp|P53824|SNZ2_YEAST;sp|P43545|SNZ3_YEAST;sp|Q03148|SNZ1_YEAST	SNZ2	sp|P53824|SNZ2_YEAST;sp|P43545|SNZ3_YEAST	52289000	0	0	0	0	0	26813000	0	0	0	0	0	38013000	0	0	0	0	0	30652000	0	0	0	0	0
sp|P53834|HCH1_YEAST	HCH1	sp|P53834|HCH1_YEAST	39623000	0	0	0	0	0	46128000	0	0	0	0	0	38272000	0	0	0	0	0	36253000	0	0	0	0	0
sp|P53839|GOR1_YEAST	GOR1	sp|P53839|GOR1_YEAST	58667000	0	0	0	0	0	70751000	0	0	15346000	0	0	59601000	28687000	0	16004000	0	0	0	0	0	0	0	0
sp|P53843|IST1_YEAST	IST1	sp|P53843|IST1_YEAST	0	0	0	0	0	0	0	0	0	0	0	0	0	0	0	0	0	0	0	0	0	0	0	11345000
sp|P53844|PDR17_YEAST	PDR17	sp|P53844|PDR17_YEAST	0	0	0	0	0	0	8714300	0	0	0	0	0	6482600	0	0	0	0	0	13257000	0	0	0	0	0
sp|P53852|SYC_YEAST	SYC	sp|P53852|SYC_YEAST	82419000	62499000	0	0	0	0	72886000	29496000	0	0	0	0	158030000	32238000	0	0	0	0	164640000	26958000	0	0	0	0
sp|P53853|VPS75_YEAST	VPS75	sp|P53853|VPS75_YEAST	21165000	0	0	0	0	0	19371000	0	0	0	0	0	26670000	0	0	0	0	0	22604000	0	0	0	0	0
sp|P53860|PDR16_YEAST	PDR16	sp|P53860|PDR16_YEAST	65667000	0	0	0	0	0	52536000	0	0	0	0	0	70249000	0	0	0	0	0	58871000	0	0	0	0	0
sp|P53868|ALG9_YEAST	ALG9	sp|P53868|ALG9_YEAST	0	52993000	45172000	39582000	60965000	66117000	0	54539000	0	29621000	32833000	0	0	71005000	62474000	59230000	96560000	96693000	0	81208000	74522000	59443000	87192000	61673000
sp|P53875|RM19_YEAST	RM19	sp|P53875|RM19_YEAST	0	28205000	1007000000	750430000	680540000	133590000	5360600	29156000	2057300000	786680000	910530000	130870000	0	47057000	1107300000	507000000	535010000	223310000	0	15890000	673020000	298520000	682670000	308030000
sp|P53877|IPI3_YEAST	IPI3	sp|P53877|IPI3_YEAST	0	0	0	0	0	0	0	0	0	0	0	0	0	0	0	0	0	0	0	0	16420000	0	0	0
sp|P53879|RHO5_YEAST	RHO5	sp|P53879|RHO5_YEAST	0	17528000	16475000	18438000	0	0	0	14600000	0	0	0	21171000	14666000	10403000	0	0	0	0	13446000	12846000	0	0	0	0
sp|P53881|RM22_YEAST	RM22	sp|P53881|RM22_YEAST	0	92795000	6145100000	1574800000	1580600000	238920000	4965500	226580000	5447100000	1827900000	1851600000	290500000	45692000	132720000	2725400000	1232700000	910860000	517610000	0	194380000	1685300000	831920000	1403700000	711720000
sp|P53883|NOP13_YEAST	NOP13	sp|P53883|NOP13_YEAST	0	157440000	272820000	141370000	72739000	17671000	0	73978000	177570000	135560000	102460000	26972000	0	104580000	367380000	126600000	59752000	0	0	145180000	123090000	95041000	69851000	0
sp|P53885|MDG1_YEAST	MDG1	sp|P53885|MDG1_YEAST	0	0	0	0	0	0	0	0	0	0	0	0	0	0	0	0	0	0	0	9194500	0	0	0	0
sp|P53889|FMP41_YEAST	FMP41	sp|P53889|FMP41_YEAST	0	0	0	0	0	0	0	0	0	0	0	0	0	0	0	0	0	0	9824000	0	0	0	0	0
sp|P53898|NSG2_YEAST	NSG2	sp|P53898|NSG2_YEAST	0	0	0	0	0	0	0	0	0	0	0	0	9914400	0	0	0	0	0	0	0	0	0	0	0
sp|P53903|PGA2_YEAST	PGA2	sp|P53903|PGA2_YEAST	0	0	0	37562000	48160000	41309000	0	0	0	35950000	35736000	50388000	0	0	0	21316000	43216000	36865000	0	0	0	20530000	38230000	32247000
sp|P53905|LSM7_YEAST	LSM7	sp|P53905|LSM7_YEAST	0	0	0	0	0	0	0	0	0	0	0	0	0	0	0	0	0	0	13864000	0	0	0	0	0
sp|P53912|YNN4_YEAST	YNN4	sp|P53912|YNN4_YEAST	542670000	96879000	16291000	7762900	10190000	5737800	482830000	102880000	0	6625000	7058400	0	460390000	51236000	17289000	7262500	0	0	373940000	25080000	0	11713000	0	0
sp|P53914|KRE33_YEAST	KRE33	sp|P53914|KRE33_YEAST	0	6125500	185090000	1061200000	266420000	32295000	0	15647000	47497000	1066600000	459190000	25253000	0	23199000	389740000	1589400000	168330000	46145000	0	21055000	161530000	1311200000	371600000	62249000
sp|P53920|NM111_YEAST	NM111	sp|P53920|NM111_YEAST	0	0	0	0	0	0	5859700	0	0	0	0	0	0	0	0	0	0	0	7334100	0	0	0	0	0
sp|P53924|DMA2_YEAST	DMA2	sp|P53924|DMA2_YEAST	21663000	0	0	0	0	0	0	0	0	0	0	0	21041000	0	0	0	0	0	19976000	0	0	0	0	0
sp|P53925|YNL5_YEAST	YNL5	sp|P53925|YNL5_YEAST	66070000	105850000	81978000	51654000	50992000	73960000	78502000	108520000	61379000	62553000	32090000	0	113800000	160020000	125030000	109900000	101910000	72972000	108840000	102260000	113770000	81304000	74428000	59054000
sp|P53927|NOP15_YEAST	NOP15	sp|P53927|NOP15_YEAST	0	0	55287000	63024000	0	0	0	0	35511000	61940000	29731000	0	0	0	49673000	45760000	0	0	0	0	40333000	55295000	0	0
sp|P53937|SWS2_YEAST	SWS2	sp|P53937|SWS2_YEAST	0	281270000	0	0	33409000	0	0	226250000	0	0	30410000	0	0	298170000	50224000	0	42685000	0	0	42045000	0	30935000	62289000	25461000
sp|P53941|IMP4_YEAST	IMP4	sp|P53941|IMP4_YEAST	0	0	111960000	247600000	66039000	0	0	0	0	266380000	91922000	0	0	0	149790000	299290000	64203000	0	0	0	113080000	244470000	68889000	0
sp|P53953|SFB2_YEAST	SFB2	sp|P53953|SFB2_YEAST	804620000	0	0	0	0	0	0	0	0	0	100750000	0	0	0	0	0	0	0	0	0	0	0	0	0
sp|P53960|YNE0_YEAST	YNE0	sp|P53960|YNE0_YEAST	0	0	0	0	0	0	6304400	0	0	0	0	0	0	0	0	0	0	0	0	0	0	0	0	0
sp|P53962|YND5_YEAST	YND5	sp|P53962|YND5_YEAST	16117000	0	0	0	0	0	16283000	0	0	0	0	0	0	0	0	0	0	0	12277000	0	0	0	0	0
sp|P53969|SAM50_YEAST	SAM50	sp|P53969|SAM50_YEAST	33070000	31479000	66117000	94499000	113430000	232100000	0	56545000	0	50390000	65303000	125390000	0	0	0	124130000	329280000	294110000	27827000	0	0	155010000	254380000	169610000
sp|P53971|FAP1_YEAST	FAP1	sp|P53971|FAP1_YEAST	0	21807000	22638000	0	0	0	0	20890000	0	29232000	0	0	0	0	26994000	20928000	0	0	0	14211000	0	0	0	0
sp|P53973|HDA1_YEAST	HDA1	sp|P53973|HDA1_YEAST	11037000	0	0	0	0	0	7236700	0	0	0	0	0	0	0	0	0	0	0	13532000	0	0	0	0	0
sp|P53978|EF3B_YEAST	EF3B	sp|P53978|EF3B_YEAST	172700000	66675000	53348000	82737000	43197000	63646000	120580000	41650000	0	50624000	54528000	39797000	125980000	114370000	29937000	84471000	49450000	49699000	115110000	70257000	0	64590000	39388000	21896000
sp|P53981|YNB0_YEAST	YNB0	sp|P53981|YNB0_YEAST	452970000	30901000	8826700	14562000	0	0	354640000	23051000	0	0	18410000	0	186500000	19373000	0	16012000	0	0	150660000	22291000	0	10076000	0	0
sp|P53982|IDHH_YEAST	IDHH	sp|P53982|IDHH_YEAST	0	0	0	0	0	0	7201300	0	0	0	0	0	0	0	0	0	0	0	19518000	0	0	0	0	0
sp|P54000|SUB1_YEAST	SUB1	sp|P54000|SUB1_YEAST	55762000	0	0	0	0	0	57573000	0	0	0	0	0	55101000	0	0	0	0	0	35571000	0	0	0	0	0
sp|P54003|SUR7_YEAST	SUR7	sp|P54003|SUR7_YEAST	0	0	0	0	46555000	107770000	0	0	0	0	0	83001000	0	0	0	0	62598000	186990000	0	0	0	0	0	131400000
sp|P54113|PUR91_YEAST	PUR91	sp|P54113|PUR91_YEAST	240780000	15290000	14932000	19299000	13155000	44359000	134090000	37920000	0	17608000	23351000	13580000	332360000	0	0	0	56777000	9154000	241500000	22248000	24330000	48984000	0	11040000
sp|P54114|ALDH3_YEAST	ALDH3	sp|P54114|ALDH3_YEAST	0	0	0	0	0	0	0	0	0	0	0	0	10220000	0	0	0	0	0	0	0	0	0	0	0
sp|P54115|ALDH6_YEAST	ALDH6	sp|P54115|ALDH6_YEAST	1150500000	583890000	583710000	271240000	355750000	267550000	956700000	484820000	452360000	277250000	369430000	453770000	1158400000	503450000	505310000	246330000	198950000	167940000	552400000	429910000	412480000	220590000	241620000	163380000
sp|P54730|UBX4_YEAST	UBX4	sp|P54730|UBX4_YEAST	0	0	0	0	0	0	0	0	0	0	0	0	0	0	0	0	0	0	9332700	0	0	0	0	0
sp|P54780|RL15B_YEAST	RL15B	sp|P54780|RL15B_YEAST	8684500	1077000000	2045900000	16207000000	16007000000	21703000000	6514700	610410000	2692500000	20886000000	17116000000	27547000000	0	852270000	3053200000	9279400000	10162000000	19392000000	9608300	1184400000	2228000000	9859000000	10463000000	19010000000
sp|P54781|ERG5_YEAST	ERG5	sp|P54781|ERG5_YEAST	0	0	0	0	0	0	0	0	0	7004300	0	0	21087000	0	0	0	0	7660300	10631000	0	0	0	0	0
sp|P54783|ALO_YEAST	ALO	sp|P54783|ALO_YEAST	59964000	54299000	0	25303000	0	0	62065000	19630000	0	0	0	0	65385000	51678000	39457000	34211000	32011000	0	72606000	0	0	0	31742000	0
sp|P54837|TMEDA_YEAST	TMEDA	sp|P54837|TMEDA_YEAST	49640000	172530000	216090000	153540000	244080000	324030000	44287000	145350000	115320000	89119000	184460000	345420000	61246000	114850000	152960000	135090000	341610000	253020000	132030000	112380000	129410000	148970000	301520000	219570000
sp|P54838|DAK1_YEAST	DAK1	sp|P54838|DAK1_YEAST	626990000	170580000	106260000	84872000	68332000	46643000	611050000	124700000	49521000	56578000	80246000	30008000	325680000	187330000	126420000	86791000	35796000	34729000	433810000	112850000	38109000	71391000	63102000	25713000
sp|P54839|HMCS_YEAST	HMCS	sp|P54839|HMCS_YEAST	1530600000	1101000000	808280000	366080000	292680000	234940000	1445200000	1005600000	657550000	423550000	334720000	482510000	1339500000	1107800000	1034300000	466600000	291900000	275940000	1239600000	970540000	810520000	425030000	288630000	362060000
sp|P54860|UFD2_YEAST	UFD2	sp|P54860|UFD2_YEAST	13631000	4323800	0	0	0	0	38267000	0	0	0	0	0	37044000	8373800	8485700	6638900	0	6093100	36407000	0	0	7184400	0	0
sp|P54861|DNM1_YEAST	DNM1	sp|P54861|DNM1_YEAST	1533100000	482240000	165770000	228980000	222960000	111790000	1411100000	389470000	64205000	257150000	185460000	55184000	534490000	511900000	78744000	302320000	193240000	35727000	595630000	260220000	51721000	98316000	112050000	115310000
sp|P54885|PROA_YEAST	PROA	sp|P54885|PROA_YEAST	1084600000	0	0	572790000	414570000	0	504290000	292950000	0	1373400000	0	0	975840000	339240000	0	0	0	0	621550000	0	0	0	861660000	0
sp|P54964|ORN_YEAST	ORN	sp|P54964|ORN_YEAST	26631000	0	0	0	0	0	33202000	0	0	0	0	0	35998000	0	0	0	0	0	45673000	0	0	0	0	0
sp|P56508|SNA2_YEAST	SNA2	sp|P56508|SNA2_YEAST	0	0	0	124650000	206700000	0	0	0	0	0	175560000	0	0	0	0	0	319000000	230400000	0	0	107900000	0	1320200000	1140300000
sp|P56628|RL22B_YEAST	RL22B	sp|P56628|RL22B_YEAST	15619000	0	59822000	767690000	709370000	1009100000	0	0	69588000	862900000	814590000	1129400000	0	0	0	147150000	213010000	324700000	0	0	0	186490000	168990000	386610000
sp|P57743|LSM3_YEAST	LSM3	sp|P57743|LSM3_YEAST	9710900	6388200	0	0	0	0	9785300	5743300	0	0	0	0	0	5080100	0	0	0	0	17098000	0	0	0	0	0
sp|P60010|ACT_YEAST	ACT	sp|P60010|ACT_YEAST	5984300000	3009200000	2114000000	1350600000	1649000000	1345800000	6146000000	2749500000	1764300000	1326700000	1596700000	1416100000	7064300000	2783200000	2515800000	1607100000	1219800000	1305600000	6602100000	2908100000	2353100000	1677200000	1621000000	1376800000
sp|P61830|H3_YEAST	H3	sp|P61830|H3_YEAST	0	2587800000	1972000000	1112000000	1598600000	452450000	116550000	1961000000	2364300000	1646700000	1615200000	1270600000	222910000	1817800000	4541300000	3417900000	2219800000	1712500000	170430000	2652000000	1663300000	3360400000	3497100000	2145100000
sp|P69771|DID2_YEAST	DID2	sp|P69771|DID2_YEAST	0	91856000	91879000	52979000	0	0	0	0	0	107890000	0	0	0	55430000	101240000	0	0	0	0	0	0	0	0	0
sp|P80210|PURA_YEAST	PURA	sp|P80210|PURA_YEAST	586960000	206620000	88989000	74164000	50695000	39307000	644550000	168290000	0	85101000	82265000	60224000	771720000	254360000	112960000	126510000	67567000	72476000	682160000	244620000	53469000	161660000	96649000	95396000
sp|P80235|CACM_YEAST	CACM	sp|P80235|CACM_YEAST	453580000	597800000	184160000	198390000	191150000	165050000	353690000	681410000	198720000	220910000	190910000	215710000	772860000	1310400000	881010000	525780000	359470000	366410000	837480000	1107000000	721380000	474860000	416750000	348540000
sp|P80428|ARP4_YEAST	ARP4	sp|P80428|ARP4_YEAST	0	29560000	0	0	0	0	0	0	0	0	0	0	0	22528000	0	0	0	0	0	26881000	0	0	0	0
sp|P81449|ATPJ_YEAST	ATPJ	sp|P81449|ATPJ_YEAST	20017000	26704000	39350000	41960000	42714000	36540000	63958000	38642000	0	48453000	49222000	48522000	113670000	103670000	52368000	118730000	113700000	78621000	107850000	104590000	98544000	119570000	66683000	88324000
sp|P87284|PMP3_YEAST	PMP3	sp|P87284|PMP3_YEAST	2375000	0	0	0	0	0	2043900	0	0	0	0	0	12462000	0	0	0	0	0	2107500	0	0	0	0	0
sp|P89105|CTR9_YEAST	CTR9	sp|P89105|CTR9_YEAST	9694700	0	0	0	0	0	0	0	0	0	0	0	0	0	0	0	0	0	0	0	0	0	0	0
sp|P89886|TMA20_YEAST	TMA20	sp|P89886|TMA20_YEAST	22289000	0	16136000	0	0	0	21056000	0	0	0	0	10613000	0	14096000	0	0	0	0	21183000	10146000	0	0	0	0
sp|Q00055|GPD1_YEAST	GPD1	sp|Q00055|GPD1_YEAST	1460000000	537330000	248230000	316240000	338570000	291350000	1369000000	425780000	227980000	249620000	332510000	337240000	1291500000	993840000	673150000	631540000	485600000	542990000	1142500000	890430000	590410000	541960000	534890000	500820000
sp|Q00245|RHO3_YEAST	RHO3	sp|Q00245|RHO3_YEAST	0	0	0	0	0	0	0	0	0	0	0	0	0	0	0	0	0	0	0	0	0	0	22870000	0
sp|Q00362|2ABA_YEAST	2ABA	sp|Q00362|2ABA_YEAST	14220000	0	0	0	0	0	11017000	0	0	0	0	0	0	0	0	0	0	0	5302700	0	0	0	0	0
sp|Q00402|NUM1_YEAST	NUM1	sp|Q00402|NUM1_YEAST	13572000	0	0	0	0	11407000	0	0	0	0	0	0	18514000	5496700	0	0	10606000	9505300	20886000	0	0	13851000	13220000	0
sp|Q00539|NAM8_YEAST	NAM8	sp|Q00539|NAM8_YEAST	0	0	0	0	0	0	0	0	0	0	0	0	0	0	0	0	0	0	0	15524000	0	0	0	0
sp|Q00684|CDC14_YEAST	CDC14	sp|Q00684|CDC14_YEAST	0	0	0	0	0	0	0	0	0	0	0	0	0	0	0	0	0	0	17611000	0	0	0	0	0
sp|Q00711|SDHA_YEAST	SDHA	sp|Q00711|SDHA_YEAST	3969900000	2460400000	2212700000	1808000000	1699900000	1791200000	3796600000	3105400000	1499600000	2164300000	2515000000	3044800000	2090400000	817600000	507640000	1010300000	899290000	751210000	2670200000	812780000	753060000	924900000	970710000	675840000
sp|Q00764|TPS1_YEAST	TPS1	sp|Q00764|TPS1_YEAST	366430000	125850000	42548000	61236000	44851000	22543000	233210000	132630000	88130000	67504000	67281000	116150000	400660000	120010000	156300000	90150000	59998000	49046000	500510000	185880000	61248000	77474000	42025000	26866000
sp|Q00776|AP1M1_YEAST	AP1M1	sp|Q00776|AP1M1_YEAST	0	0	0	0	0	0	0	0	0	0	0	0	0	13064000	12023000	14099000	0	0	0	0	0	0	0	0
sp|Q00873|CYT2_YEAST	CYT2	sp|Q00873|CYT2_YEAST	70206000	0	192390000	0	0	81209000	50792000	78309000	0	0	0	0	0	0	0	0	0	0	0	0	0	0	0	0
sp|Q00916|RU17_YEAST	RU17	sp|Q00916|RU17_YEAST	0	23862000	13814000	0	0	0	0	0	0	0	0	0	0	26884000	0	0	0	0	0	0	0	0	0	0
sp|Q00955|ACAC_YEAST;sp|P32874|HFA1_YEAST	ACAC	sp|Q00955|ACAC_YEAST	2124800000	1148500000	915890000	711650000	758760000	599150000	2003200000	1438900000	698790000	763680000	771720000	715890000	1415500000	790710000	636080000	537960000	388950000	354320000	1284400000	660410000	380590000	484820000	419550000	364460000
sp|Q01080|RPA49_YEAST	RPA49	sp|Q01080|RPA49_YEAST	34388000	0	0	0	0	0	16623000	0	0	0	0	0	0	0	0	0	0	0	30156000	0	0	0	0	0
sp|Q01159|MCE1_YEAST	MCE1	sp|Q01159|MCE1_YEAST	40275000	38454000	0	0	0	0	36167000	15765000	0	0	0	0	61357000	31014000	0	0	0	0	56096000	0	0	0	0	0
sp|Q01163|RT23_YEAST	RT23	sp|Q01163|RT23_YEAST	29471000	1860300000	242340000	1024900000	1388800000	273380000	36131000	2097900000	97940000	979130000	2077800000	357060000	42999000	1644500000	230030000	758600000	1208800000	568870000	34880000	1814700000	104990000	755620000	1652400000	901210000
sp|Q01217|ARG56_YEAST	ARG56	sp|Q01217|ARG56_YEAST	89500000	14326000	0	0	0	0	90025000	15809000	0	0	0	0	87698000	14746000	12096000	4850700	0	0	82485000	11898000	0	0	0	0
sp|Q01329|PTA1_YEAST	PTA1	sp|Q01329|PTA1_YEAST	0	0	0	0	0	0	7353500	0	0	0	0	0	0	0	0	0	0	0	0	0	0	0	0	0
sp|Q01448|HPC2_YEAST	HPC2	sp|Q01448|HPC2_YEAST	0	0	0	0	0	0	0	0	0	0	0	0	0	0	0	0	0	0	0	0	0	6882800	0	0
sp|Q01454|CTF4_YEAST	CTF4	sp|Q01454|CTF4_YEAST	0	0	0	0	0	0	0	0	0	0	0	0	0	0	0	0	0	0	5396000	0	0	0	0	0
sp|Q01476|UBP2_YEAST	UBP2	sp|Q01476|UBP2_YEAST	57621000	0	0	0	0	0	54643000	0	0	0	0	0	75776000	0	0	0	0	0	63626000	0	0	0	0	0
sp|Q01477|UBP3_YEAST	UBP3	sp|Q01477|UBP3_YEAST	0	0	0	0	0	0	22009000	0	0	0	0	0	21948000	0	0	0	0	0	19634000	0	0	0	0	0
sp|Q01519|COX12_YEAST	COX12	sp|Q01519|COX12_YEAST	14478000	0	0	0	64657000	38200000	35777000	0	0	0	0	77508000	0	0	0	52487000	95397000	129640000	0	0	0	46205000	204000000	74838000
sp|Q01532-2|BLH1_YEAST;sp|Q01532|BLH1_YEAST	BLH1	sp|Q01532-2|BLH1_YEAST;sp|Q01532|BLH1_YEAST	451110000	81942000	40252000	35220000	5094400	4013200	350870000	119370000	30823000	39268000	24421000	23070000	690220000	154500000	96180000	62177000	13125000	0	588240000	118310000	30081000	59319000	10190000	4661200
sp|Q01560|NOP3_YEAST	NOP3	sp|Q01560|NOP3_YEAST	420210000	83345000	16751000	7396200	0	0	437160000	58845000	16986000	8636700	0	0	365660000	33631000	24123000	0	0	0	456440000	35472000	0	14437000	0	0
sp|Q01574|ACS1_YEAST	ACS1	sp|Q01574|ACS1_YEAST	16892000000	7768900000	4568900000	5674200000	5695600000	5066400000	19004000000	9193800000	4315800000	5332800000	5887500000	5016100000	19272000000	10584000000	8957600000	10216000000	8381500000	6973400000	17091000000	10829000000	9681100000	9269400000	7938700000	6425600000
sp|Q01649|CIK1_YEAST	CIK1	sp|Q01649|CIK1_YEAST	105140000	0	0	0	0	0	0	0	0	0	0	0	0	0	0	0	0	0	0	0	0	0	0	0
sp|Q01662|MAP1_YEAST	MAP1	sp|Q01662|MAP1_YEAST	23976000	0	0	0	0	0	29673000	0	0	0	0	0	42580000	0	0	0	0	0	25955000	0	0	0	0	0
sp|Q01852|TIM44_YEAST	TIM44	sp|Q01852|TIM44_YEAST	173810000	23066000	25652000	7224700	0	0	178690000	28310000	0	0	7365400	0	53466000	12009000	0	0	0	0	68356000	0	0	0	0	0
sp|Q01855|RS15_YEAST	RS15	sp|Q01855|RS15_YEAST	2851200	3224600000	622820000	28229000000	13622000000	38655000000	5290600	2921200000	619180000	25761000000	28920000000	34254000000	11995000	1901500000	1348700000	12813000000	5337500000	28248000000	20828000	3774500000	465900000	10113000000	10702000000	30563000000
sp|Q12691|ATN5_YEAST;sp|Q01896|ATN2_YEAST	ATN5	sp|Q12691|ATN5_YEAST;sp|Q01896|ATN2_YEAST	15518000	69189000	64368000	51406000	58085000	53116000	15778000	41816000	68071000	40712000	49401000	50311000	35683000	50339000	53158000	28708000	26432000	52504000	0	49300000	0	24348000	0	22644000
sp|Q01939|PRS8_YEAST	PRS8	sp|Q01939|PRS8_YEAST	386940000	1017100000	265110000	181170000	161780000	165170000	376870000	618700000	271850000	198810000	188300000	188760000	450980000	987150000	570680000	309460000	215680000	215020000	303200000	1248400000	695860000	331670000	153250000	142580000
sp|Q01976|ADPP_YEAST	ADPP	sp|Q01976|ADPP_YEAST	43441000	0	0	0	0	0	49351000	0	0	0	0	0	0	0	0	0	0	0	37563000	0	0	0	0	0
sp|Q02046|MTD1_YEAST	MTD1	sp|Q02046|MTD1_YEAST	93243000	0	0	0	0	0	127850000	0	0	0	0	0	163200000	0	0	0	0	0	120230000	0	0	0	0	0
sp|Q02199|NUP49_YEAST	NUP49	sp|Q02199|NUP49_YEAST	8218000	0	0	0	0	0	11264000	0	0	0	0	0	0	0	0	0	0	0	0	0	0	0	0	0
sp|Q02201|OSH6_YEAST	OSH6	sp|Q02201|OSH6_YEAST	11540000	0	0	0	0	0	11257000	0	0	0	0	0	9305300	0	0	0	0	0	11613000	0	0	0	0	0
sp|Q02204|RM13_YEAST	RM13	sp|Q02204|RM13_YEAST	3567300	82593000	2587100000	1358300000	913020000	107370000	24257000	65481000	2909500000	1663700000	1329100000	118940000	0	58888000	2970300000	931740000	635780000	318110000	5986800	42792000	1170200000	704280000	1136700000	367850000
sp|Q02207|FOX2_YEAST	FOX2	sp|Q02207|FOX2_YEAST	1107100000	550750000	318160000	393890000	483780000	620320000	926610000	619300000	163480000	355650000	427750000	442610000	959670000	419210000	400510000	528410000	418860000	726950000	821800000	510150000	234140000	354830000	382510000	466680000
sp|Q02256|PVH1_YEAST	PVH1	sp|Q02256|PVH1_YEAST	0	0	0	0	0	0	0	0	0	0	0	0	0	0	0	0	0	0	3470900	0	0	0	0	0
sp|Q02326|RL6A_YEAST	RL6A	sp|Q02326|RL6A_YEAST	0	130210000	1225600000	6420500000	5022300000	10290000000	10178000	121010000	1258500000	6799200000	4864100000	9066900000	0	132800000	1470400000	3280300000	4146100000	5779500000	9524200	167510000	915260000	3736600000	3863500000	7710800000
sp|Q02354|UTP6_YEAST	UTP6	sp|Q02354|UTP6_YEAST	0	12506000	173210000	557010000	126480000	31100000	0	0	94199000	610050000	226110000	63455000	0	0	260780000	714090000	99409000	0	0	0	93072000	578890000	112820000	0
sp|Q02455|MLP1_YEAST	MLP1	sp|Q02455|MLP1_YEAST	0	39275000	0	0	0	0	0	0	0	0	0	0	0	0	0	0	0	0	0	0	0	0	0	0
sp|Q02486|ABF2_YEAST	ABF2	sp|Q02486|ABF2_YEAST	0	0	0	0	0	0	0	0	0	0	0	0	0	0	0	0	0	0	41911000	0	0	0	0	0
sp|Q02516|HAP5_YEAST	HAP5	sp|Q02516|HAP5_YEAST	0	0	0	0	0	0	0	0	0	0	0	0	4958700	0	0	0	0	0	0	0	0	0	0	0
sp|Q02608|RT16_YEAST	RT16	sp|Q02608|RT16_YEAST	0	1138700000	82685000	261550000	452950000	82907000	0	1455400000	175620000	290260000	672250000	119190000	0	299120000	98990000	238310000	349370000	206150000	0	854130000	35445000	180130000	484150000	271500000
sp|Q02642|NACB1_YEAST	NACB1	sp|Q02642|NACB1_YEAST	69415000	0	0	0	0	0	98856000	0	0	0	0	0	45569000	0	0	0	0	0	42072000	0	0	0	0	0
sp|Q02753|RL21A_YEAST	RL21A	sp|Q02753|RL21A_YEAST	0	572500000	5885400000	29585000000	24858000000	37183000000	16408000	367340000	3948100000	32271000000	26078000000	44248000000	0	336270000	4573200000	17628000000	18711000000	32517000000	0	394720000	3216300000	17523000000	17659000000	37846000000
sp|Q02776|TIM50_YEAST	TIM50	sp|Q02776|TIM50_YEAST	205880000	276430000	79871000	94073000	83540000	95466000	209030000	224010000	90807000	70384000	57150000	79657000	122150000	164920000	49955000	50832000	48521000	52895000	117280000	125290000	82364000	78971000	64304000	49885000
sp|Q02784|GLRX5_YEAST	GLRX5	sp|Q02784|GLRX5_YEAST	0	0	0	0	0	0	0	0	0	0	0	0	0	0	0	0	0	0	19588000	0	0	0	0	0
sp|Q02793|SKI8_YEAST	SKI8	sp|Q02793|SKI8_YEAST	0	0	0	0	0	0	0	0	0	0	0	0	0	62379000	10141000	9940500	0	0	0	0	0	0	0	0
sp|Q02795|OSTD_YEAST	OSTD	sp|Q02795|OSTD_YEAST	0	0	96193000	100720000	118170000	115720000	0	73494000	0	82116000	121940000	226000000	0	73965000	68327000	91557000	146230000	131450000	0	77096000	0	81513000	101070000	90127000
sp|Q02821|IMA1_YEAST	IMA1	sp|Q02821|IMA1_YEAST	130010000	0	0	0	0	0	132210000	0	0	0	0	0	82065000	0	0	78968000	0	0	102700000	0	0	0	0	0
sp|Q02883|FMP30_YEAST	FMP30	sp|Q02883|FMP30_YEAST	0	0	0	0	0	0	0	0	0	0	0	0	0	18781000	0	0	0	0	0	0	0	0	0	0
sp|Q02888|AIM43_YEAST	AIM43	sp|Q02888|AIM43_YEAST	18287000	10750000	0	16682000	18061000	17923000	19242000	22810000	0	24690000	26543000	16403000	0	17305000	0	11879000	16542000	11775000	13702000	12256000	0	13690000	13237000	11407000
sp|Q02889|MGR2_YEAST	MGR2	sp|Q02889|MGR2_YEAST	37400000	0	0	127780000	163390000	230560000	29133000	0	0	106620000	157030000	320760000	34204000	0	0	71016000	68321000	150940000	32463000	0	0	48363000	89692000	0
sp|Q02892|NOG1_YEAST	NOG1	sp|Q02892|NOG1_YEAST	4104500	20040000	2549400000	909840000	177530000	40205000	0	46790000	1026400000	1220500000	329110000	37473000	38842000	93282000	3093700000	729840000	137040000	23729000	19701000	29259000	947950000	676910000	122230000	42864000
sp|Q02896|YDC1_YEAST	YDC1	sp|Q02896|YDC1_YEAST	0	0	0	0	0	0	0	0	0	0	0	0	0	0	0	0	0	0	6376800	0	0	0	0	0
sp|Q02931|UTP17_YEAST	UTP17	sp|Q02931|UTP17_YEAST	0	2787600	61356000	962530000	197100000	22054000	0	0	19611000	1350600000	440630000	40166000	0	5675500	117350000	1664700000	188630000	34462000	6046800	2087800	101040000	1118500000	196610000	48703000
sp|Q02933|RNY1_YEAST	RNY1	sp|Q02933|RNY1_YEAST	7171500	108140000	0	217240000	120500000	351860000	0	100360000	0	240330000	155380000	156130000	10576000	42049000	15781000	207410000	222650000	359160000	117620000	22671000	0	197010000	116470000	387390000
sp|Q02950|RT51_YEAST	RT51	sp|Q02950|RT51_YEAST	32780000	228070000	101470000	556480000	1036400000	217590000	0	333620000	172340000	624190000	1111200000	256800000	0	433900000	206250000	521260000	818150000	387290000	0	522130000	82392000	448630000	1042900000	514120000
sp|Q02961|YP113_YEAST	YP113	sp|Q02961|YP113_YEAST	17921000	0	0	7988400	0	0	14727000	0	0	0	9402600	0	36870000	0	0	11707000	0	9473300	29261000	0	0	9022300	0	0
sp|Q02981|YP109_YEAST	YP109	sp|Q02981|YP109_YEAST	85542000	0	0	0	0	0	0	0	0	0	0	0	0	0	0	0	0	0	0	0	0	0	0	0
sp|Q03010|UME1_YEAST	UME1	sp|Q03010|UME1_YEAST	0	0	0	0	0	0	0	0	0	0	0	0	0	0	0	0	0	0	8636000	0	0	0	0	0
sp|Q03012|SPP1_YEAST	SPP1	sp|Q03012|SPP1_YEAST	0	0	0	0	0	0	0	0	0	0	0	0	0	0	0	0	0	0	1995900	0	0	0	0	0
sp|Q03020|ISU1_YEAST	ISU1	sp|Q03020|ISU1_YEAST	0	0	0	0	0	0	0	0	0	0	0	0	0	0	0	0	0	0	6317100	0	0	0	0	0
sp|Q03028|ODC1_YEAST	ODC1	sp|Q03028|ODC1_YEAST	445440000	790310000	666650000	860940000	1341100000	1640000000	340440000	967110000	768340000	881690000	1617900000	3285200000	712370000	515480000	679040000	686200000	1180300000	1203700000	676940000	591920000	513520000	563500000	883900000	896560000
sp|Q03048|COFI_YEAST	COFI	sp|Q03048|COFI_YEAST	437790000	6525900	32741000	12488000	20338000	15728000	493850000	9916300	0	40848000	22642000	27437000	420130000	9428100	0	17552000	11204000	9649600	518410000	7901700	23387000	14788000	0	7432400
sp|Q03102|YMN1_YEAST	YMN1	sp|Q03102|YMN1_YEAST	33009000	0	0	0	0	0	36359000	0	0	0	0	0	25316000	0	0	0	0	0	20488000	0	0	0	0	0
sp|Q03103|ERO1_YEAST	ERO1	sp|Q03103|ERO1_YEAST	22914000	0	0	0	0	0	13610000	0	0	5057400	0	0	0	10457000	0	0	0	0	11898000	0	0	0	0	0
sp|Q03104|MSC1_YEAST	MSC1	sp|Q03104|MSC1_YEAST	556530000	70282000	16564000	6878800	0	3728200	252320000	16139000	0	0	11650000	0	525910000	23672000	9739100	9805100	0	0	459980000	8946900	0	7884000	0	0
sp|Q03151|MTG1_YEAST	MTG1	sp|Q03151|MTG1_YEAST	0	0	0	0	0	0	0	26556000	0	0	0	0	0	17902000	14452000	10844000	7072700	0	0	15044000	0	0	0	0
sp|Q03153|ATP25_YEAST	ATP25	sp|Q03153|ATP25_YEAST	0	0	0	17705000	0	0	0	0	252420000	18703000	0	0	0	0	0	0	0	0	0	0	82844000	0	0	0
sp|Q03161|YMY9_YEAST	YMY9	sp|Q03161|YMY9_YEAST	241390000	214470000	125700000	128310000	104130000	120810000	199650000	216350000	106530000	128210000	167850000	222430000	173120000	145850000	95041000	163990000	117530000	116880000	169000000	155130000	132360000	100850000	74698000	79547000
sp|Q03175|SRT1_YEAST	SRT1	sp|Q03175|SRT1_YEAST	112590000	267010000	196460000	126540000	141560000	128110000	104610000	220080000	157580000	120430000	118570000	198230000	197270000	417590000	329810000	230560000	212700000	200720000	130130000	343960000	260050000	182740000	183690000	158880000
sp|Q03195|RLI1_YEAST	RLI1	sp|Q03195|RLI1_YEAST	315670000	218750000	160090000	406950000	797290000	270310000	301960000	234850000	185350000	336600000	944030000	465310000	380000000	217030000	237940000	455510000	378790000	139040000	351340000	213800000	139030000	282010000	361190000	189610000
sp|Q03201|RT10_YEAST	RT10	sp|Q03201|RT10_YEAST	29885000	667130000	183130000	309540000	482580000	112220000	0	670590000	217880000	329010000	651140000	228040000	0	613010000	192910000	253070000	437450000	210170000	0	791830000	89589000	210900000	496580000	294940000
sp|Q03219|YM44_YEAST	YM44	sp|Q03219|YM44_YEAST	7633100	0	0	0	0	0	9819200	0	0	0	0	0	14530000	21953000	17059000	0	0	0	0	19525000	0	0	0	0
sp|Q03246|RT17_YEAST	RT17	sp|Q03246|RT17_YEAST	13065000	1411800000	337120000	406000000	828590000	144210000	9150000	1207900000	263130000	360550000	905310000	246900000	0	869370000	248390000	300300000	637890000	215610000	0	847400000	133910000	259450000	829030000	389320000
sp|Q03262|PGM3_YEAST	PGM3	sp|Q03262|PGM3_YEAST	13789000	0	0	0	0	0	12477000	0	0	9100000	0	0	19227000	0	0	0	0	0	24630000	0	0	0	0	0
sp|Q03280|TOM1_YEAST	TOM1	sp|Q03280|TOM1_YEAST	28745000	22830000	0	0	0	0	28629000	19676000	0	0	0	0	13908000	22148000	0	0	0	0	24716000	22178000	0	0	0	0
sp|Q03362|YD476_YEAST	YD476	sp|Q03362|YD476_YEAST	13834000	0	0	0	0	0	13263000	0	0	0	0	0	32528000	0	0	0	0	0	31163000	0	0	0	0	0
sp|Q03430|RSM28_YEAST	RSM28	sp|Q03430|RSM28_YEAST	0	14449000	41588000	403560000	659560000	108660000	0	35847000	20715000	532790000	1245600000	123760000	0	8880200	19298000	239190000	485460000	229450000	0	0	33194000	316810000	909200000	347740000
sp|Q03435|NHP10_YEAST	NHP10	sp|Q03435|NHP10_YEAST	0	0	0	0	0	0	0	0	0	0	0	0	0	0	0	0	0	0	0	0	0	4844000	0	0
sp|Q03516|RSN1_YEAST	RSN1	sp|Q03516|RSN1_YEAST	0	0	0	0	0	0	0	0	0	0	0	0	0	0	0	0	0	0	0	0	0	0	0	7124500
sp|Q03529|SCS7_YEAST	SCS7	sp|Q03529|SCS7_YEAST	0	0	0	0	0	0	0	0	0	0	0	0	0	0	0	0	0	0	0	0	0	0	0	8587100
sp|Q03532|HAS1_YEAST	HAS1	sp|Q03532|HAS1_YEAST	6036500	10337000	989420000	1058800000	77324000	38419000	0	0	645910000	1190500000	182310000	0	11034000	18324000	1039000000	760320000	49269000	29772000	8556300	15580000	575090000	496630000	43082000	0
sp|Q03557|GATA_YEAST	GATA	sp|Q03557|GATA_YEAST	0	0	0	0	0	0	0	6464000	0	0	0	0	0	0	0	0	0	0	0	0	0	0	0	0
sp|Q03558|OYE2_YEAST;sp|P41816|OYE3_YEAST	OYE2	sp|Q03558|OYE2_YEAST	38644000	54475000	87093000	0	0	0	38111000	46682000	66718000	31206000	0	0	76736000	43878000	0	30963000	31800000	75722000	52502000	38167000	0	37896000	42340000	0
sp|Q03629|YMH9_YEAST	YMH9	sp|Q03629|YMH9_YEAST	0	0	0	0	0	0	0	0	0	0	0	0	0	0	0	0	0	0	2690700	0	0	0	0	0
sp|Q03640|TCB3_YEAST	TCB3	sp|Q03640|TCB3_YEAST	36372000	53719000	34810000	20519000	20991000	0	36993000	62139000	0	0	0	0	76599000	93848000	43402000	48242000	27000000	13487000	84753000	71533000	40239000	29252000	38146000	0
sp|Q03655|GAS3_YEAST	GAS3	sp|Q03655|GAS3_YEAST	89150000	2007600000	713280000	265490000	528010000	859730000	74701000	277720000	0	256280000	310570000	475410000	210080000	484650000	1036700000	303750000	525220000	692460000	154980000	596890000	171130000	246580000	555810000	744440000
sp|Q03690|CLU_YEAST	CLU	sp|Q03690|CLU_YEAST	1655300000	607770000	355660000	319150000	321460000	257530000	1513700000	745890000	151110000	345720000	358720000	372210000	966560000	330600000	159650000	245230000	144340000	131960000	990210000	344680000	247030000	218920000	155390000	169160000
sp|Q03705|CG121_YEAST	CG121	sp|Q03705|CG121_YEAST	0	0	0	0	0	0	0	0	0	0	0	0	0	0	0	0	0	0	0	7042500	0	0	0	0
sp|Q03713|RCF1_YEAST	RCF1	sp|Q03713|RCF1_YEAST	53494000	502740000	944590000	1125700000	2202000000	3060900000	56111000	97781000	237960000	478900000	971040000	1694200000	31510000	205270000	263360000	500350000	1732300000	1587600000	44368000	303030000	254350000	612670000	1765400000	1281800000
sp|Q03723|OST6_YEAST	OST6	sp|Q03723|OST6_YEAST	0	0	0	0	0	0	0	0	0	0	0	0	0	0	0	0	0	0	18998000	0	0	0	0	0
sp|Q03768|GIR2_YEAST	GIR2	sp|Q03768|GIR2_YEAST	12740000	0	0	0	0	0	10775000	0	0	0	0	0	0	0	0	0	0	0	22564000	0	0	0	0	0
sp|Q03771|YD161_YEAST	YD161	sp|Q03771|YD161_YEAST	0	0	0	0	0	0	34787000	0	0	0	0	0	38171000	0	0	0	0	0	33107000	0	0	0	0	0
sp|Q03776|PRP42_YEAST	PRP42	sp|Q03776|PRP42_YEAST	0	0	0	0	0	0	0	0	0	0	0	0	0	10138000	0	0	0	0	0	0	0	0	0	0
sp|Q03778|RIFK_YEAST	RIFK	sp|Q03778|RIFK_YEAST	0	0	0	0	0	0	0	0	0	0	0	0	0	0	0	0	12449000	0	0	0	0	0	0	0
sp|Q03798|AIM36_YEAST	AIM36	sp|Q03798|AIM36_YEAST	72144000	52246000	62226000	102090000	163230000	192010000	50732000	41473000	0	69597000	124210000	241750000	22565000	13437000	29453000	20274000	49396000	45888000	20520000	0	0	19982000	24352000	36062000
sp|Q03799|RT08_YEAST	RT08	sp|Q03799|RT08_YEAST	24785000	1092400000	264370000	280160000	492830000	87944000	19003000	1322500000	158040000	330720000	637580000	131620000	0	908120000	122490000	256390000	353300000	195480000	0	853320000	95862000	203490000	423110000	279910000
sp|Q03834|MSH6_YEAST	MSH6	sp|Q03834|MSH6_YEAST	4015500	0	0	0	0	0	3795700	3635100	0	0	0	0	0	0	0	0	0	0	5609700	2397000	0	0	0	0
sp|Q03835|GLRX3_YEAST	GLRX3	sp|Q03835|GLRX3_YEAST	7536400	0	0	0	0	0	7102800	0	0	0	0	0	0	0	0	0	0	0	0	0	0	0	0	0
sp|Q03862|ARX1_YEAST	ARX1	sp|Q03862|ARX1_YEAST	0	0	0	20853000	0	0	0	0	0	37715000	0	0	26073000	0	0	0	0	0	19721000	0	0	0	0	0
sp|Q03921|DOP1_YEAST	DOP1	sp|Q03921|DOP1_YEAST	0	30712000	0	0	0	0	22065000	23628000	0	0	0	0	0	40344000	23728000	0	0	0	0	30598000	0	0	0	0
sp|Q03940|RUVB1_YEAST	RUVB1	sp|Q03940|RUVB1_YEAST	89327000	275200000	131300000	92840000	38757000	44026000	92815000	313920000	133880000	156590000	70546000	0	200360000	394410000	288150000	180260000	101110000	87904000	129260000	458600000	263840000	158910000	99162000	101020000
sp|Q03973|HMO1_YEAST	HMO1	sp|Q03973|HMO1_YEAST	0	0	0	0	0	0	0	9876900	0	0	0	0	0	0	0	0	0	0	0	0	0	0	0	0
sp|Q03976|RT24_YEAST	RT24	sp|Q03976|RT24_YEAST	30626000	1886800000	275960000	357090000	617790000	169290000	12880000	1655400000	294720000	391240000	934710000	157180000	0	861810000	162700000	351670000	645170000	207490000	0	1328000000	123310000	256950000	673760000	374890000
sp|Q04002|SCC2_YEAST	SCC2	sp|Q04002|SCC2_YEAST	24136000	33980000	30676000	19051000	0	21287000	21887000	18120000	0	23173000	25112000	0	23109000	43510000	0	19051000	22058000	0	30706000	33516000	0	16218000	0	0
sp|Q04013|YHM2_YEAST	YHM2	sp|Q04013|YHM2_YEAST	209480000	396010000	327710000	488130000	786280000	1072500000	145870000	399030000	198140000	598970000	1149100000	1694800000	190800000	361290000	267820000	440010000	473840000	539980000	233650000	296030000	176230000	449750000	388450000	424460000
sp|Q04062|RPN9_YEAST	RPN9	sp|Q04062|RPN9_YEAST	891030000	966110000	385760000	154910000	110460000	351050000	726950000	1075400000	122790000	132750000	133700000	96839000	992760000	1192000000	579670000	179200000	275930000	0	854840000	1007600000	192840000	189540000	111150000	0
sp|Q04067|EIF3G_YEAST	EIF3G	sp|Q04067|EIF3G_YEAST	74808000	0	15753000	0	11152000	0	53267000	0	0	12563000	0	0	58914000	5033700	0	0	0	0	64709000	0	0	0	0	0
sp|Q04080|GPI17_YEAST	GPI17	sp|Q04080|GPI17_YEAST	0	0	0	0	0	0	0	0	0	0	0	0	0	0	0	0	24939000	0	0	0	0	0	0	0
sp|Q04110|ECM11_YEAST	ECM11	sp|Q04110|ECM11_YEAST	46449000	0	0	0	0	0	51749000	0	0	0	0	0	84791000	3219100	0	0	0	0	59221000	0	0	0	0	0
sp|Q04119|PPN1_YEAST	PPN1	sp|Q04119|PPN1_YEAST	0	0	56100000	60627000	64469000	22530000	0	0	0	45411000	50840000	0	0	0	0	55334000	0	0	0	0	0	45152000	36494000	0
sp|Q04172|SHE9_YEAST	SHE9	sp|Q04172|SHE9_YEAST	0	0	0	0	0	0	0	0	0	0	0	0	0	0	0	0	0	0	1815600	0	0	0	0	0
sp|Q04175|SXM1_YEAST	SXM1	sp|Q04175|SXM1_YEAST	2547100	0	0	0	0	0	2600300	0	0	0	0	0	3727400	0	0	1652900	0	0	9145100	0	0	0	0	0
sp|Q04177|UTP5_YEAST	UTP5	sp|Q04177|UTP5_YEAST	0	30451000	53986000	635630000	184950000	39848000	0	0	0	707500000	282760000	45526000	0	0	92657000	721330000	123370000	13580000	0	23238000	78599000	1042700000	169690000	59883000
sp|Q04178|HPRT_YEAST	HPRT	sp|Q04178|HPRT_YEAST	185040000	17476000	0	9999600	0	0	210450000	20386000	0	0	8265200	0	86083000	0	0	0	0	0	80256000	28497000	0	0	0	0
sp|Q04183|TR120_YEAST	TR120	sp|Q04183|TR120_YEAST	0	0	0	0	0	0	0	0	0	0	0	0	0	14058000	0	0	0	0	0	0	0	0	0	0
sp|Q04199|CAC2_YEAST	CAC2	sp|Q04199|CAC2_YEAST	0	0	0	0	0	0	0	0	0	0	0	0	0	0	0	0	0	0	6802700	0	0	0	0	0
sp|Q04201|CUE4_YEAST	CUE4	sp|Q04201|CUE4_YEAST	0	0	0	0	0	43835000	0	0	0	0	0	0	0	0	0	0	42564000	36071000	0	0	0	0	37993000	0
sp|Q04225|RRB1_YEAST	RRB1	sp|Q04225|RRB1_YEAST	0	0	0	0	0	0	0	0	0	0	0	0	0	0	0	0	0	0	8831100	0	0	0	0	0
sp|Q04228|UBX2_YEAST	UBX2	sp|Q04228|UBX2_YEAST	0	47314000	0	0	0	0	0	63480000	0	0	0	0	0	59571000	0	0	30323000	0	0	52846000	0	0	0	0
sp|Q04264|PDS5_YEAST	PDS5	sp|Q04264|PDS5_YEAST	94017000	78974000	0	0	0	0	58229000	78274000	0	0	0	0	107850000	142830000	104090000	301130000	115020000	27304000	106510000	104830000	0	0	113710000	70483000
sp|Q04279|SEG1_YEAST	SEG1	sp|Q04279|SEG1_YEAST	0	0	43674000	32527000	57740000	85844000	0	0	0	33469000	49876000	177750000	0	0	0	0	25283000	71331000	0	0	0	32472000	51879000	55009000
sp|Q04304|YMY0_YEAST	YMY0	sp|Q04304|YMY0_YEAST	81348000	0	0	0	0	0	72755000	0	0	0	0	0	58161000	0	0	0	0	0	42065000	0	0	0	0	0
sp|Q04305|UTP15_YEAST	UTP15	sp|Q04305|UTP15_YEAST	0	0	143060000	514420000	151990000	75395000	0	0	74938000	646570000	265500000	79037000	0	12571000	253300000	571700000	125600000	50422000	0	6824300	108230000	548820000	184820000	69229000
sp|Q04336|YM54_YEAST	YM54	sp|Q04336|YM54_YEAST	153610000	16286000	0	18185000	17944000	10131000	97467000	20785000	0	17772000	0	0	287500000	14109000	22645000	15361000	0	0	89133000	0	0	0	9115800	0
sp|Q04344|HNT1_YEAST	HNT1	sp|Q04344|HNT1_YEAST	55538000	0	0	0	0	25034000	73042000	0	0	0	0	0	82119000	0	0	0	0	0	29814000	0	0	0	0	0
sp|Q04371|YMR7_YEAST	YMR7	sp|Q04371|YMR7_YEAST	0	0	0	0	0	0	0	0	0	0	0	0	0	0	0	0	0	0	0	0	0	10835000	0	0
sp|Q04373|PUF6_YEAST	PUF6	sp|Q04373|PUF6_YEAST	0	375620000	104640000	0	0	0	0	146840000	86098000	64935000	0	0	0	0	108670000	0	0	0	0	147790000	129510000	0	0	0
sp|Q04409|EMI2_YEAST	EMI2	sp|Q04409|EMI2_YEAST	124700000	31784000	33560000	0	0	0	59553000	23968000	0	0	21380000	0	80620000	32168000	35801000	17969000	0	0	293690000	15120000	0	0	0	0
sp|Q04410|GRH1_YEAST	GRH1	sp|Q04410|GRH1_YEAST	35246000	0	0	0	0	0	23352000	0	0	0	0	0	25306000	16510000	0	0	0	0	22349000	0	0	0	0	0
sp|Q04430|PANK_YEAST	PANK	sp|Q04430|PANK_YEAST	0	0	0	0	0	0	0	0	0	0	0	0	0	0	0	0	0	0	20247000	0	0	0	0	0
sp|Q04432|HSP31_YEAST	HSP31	sp|Q04432|HSP31_YEAST	19157000	0	0	0	0	0	16043000	0	0	0	0	0	0	0	0	0	0	0	9750800	0	0	0	0	0
sp|Q04439|MYO5_YEAST	MYO5	sp|Q04439|MYO5_YEAST	0	0	0	0	0	0	0	0	0	0	0	0	0	0	0	0	0	0	0	0	0	0	4972300	0
sp|Q04458|HFD1_YEAST	HFD1	sp|Q04458|HFD1_YEAST	340420000	574320000	266040000	332890000	304320000	336480000	347350000	554660000	251710000	226900000	283030000	327610000	447570000	530660000	308400000	340060000	495540000	449200000	476020000	554420000	304270000	355250000	422270000	353890000
sp|Q04472|MGR3_YEAST	MGR3	sp|Q04472|MGR3_YEAST	25846000	31675000	0	0	0	31050000	17907000	80135000	32593000	0	0	0	48447000	0	0	0	0	0	48880000	28456000	0	0	0	0
sp|Q04489|ASND1_YEAST	ASND1	sp|Q04489|ASND1_YEAST	0	0	0	0	0	0	0	0	0	0	0	0	0	0	0	0	0	0	0	0	14897000	0	0	0
sp|Q04491|SEC13_YEAST	SEC13	sp|Q04491|SEC13_YEAST	306580000	171730000	139560000	83721000	69825000	58401000	277820000	164740000	85765000	87156000	70847000	69378000	400350000	170360000	141660000	99669000	56666000	46031000	367450000	194720000	150770000	106520000	73078000	57088000
sp|Q04500|UTP14_YEAST	UTP14	sp|Q04500|UTP14_YEAST	0	0	30198000	50790000	16516000	0	0	0	0	39820000	0	0	0	0	19295000	29620000	0	0	0	0	0	21063000	0	0
sp|Q04598|RM34_YEAST	RM34	sp|Q04598|RM34_YEAST	0	0	1979300000	261110000	228870000	64701000	0	0	679540000	822580000	929860000	0	0	0	242210000	146750000	149630000	110940000	0	0	154070000	0	207250000	83887000
sp|Q04599|RM01_YEAST	RM01	sp|Q04599|RM01_YEAST	48101000	194320000	6487700000	1142300000	1096200000	217200000	60431000	205370000	5026800000	1430200000	1500900000	332560000	0	76019000	2194000000	598290000	728450000	330320000	0	83457000	1907100000	523920000	904140000	569320000
sp|Q04636|POB3_YEAST	POB3	sp|Q04636|POB3_YEAST	44950000	0	0	0	0	0	34940000	0	0	0	0	0	70079000	0	0	0	0	0	64303000	0	0	0	0	0
sp|Q04651|ERV41_YEAST	ERV41	sp|Q04651|ERV41_YEAST	0	0	0	0	0	0	12814000	0	0	0	0	0	17242000	0	0	0	0	0	20402000	0	0	0	0	0
sp|Q04660|ERB1_YEAST	ERB1	sp|Q04660|ERB1_YEAST	0	7772600	870040000	653000000	162310000	64706000	0	30611000	453440000	814700000	259180000	73252000	0	59260000	1042300000	656960000	149480000	98264000	0	39772000	595490000	609580000	162040000	85775000
sp|Q04693|RSE1_YEAST	RSE1	sp|Q04693|RSE1_YEAST	0	573370000	0	795590000	0	1507400000	0	683670000	0	914660000	1032800000	977770000	0	757840000	0	636570000	819210000	797110000	0	0	0	602560000	520680000	883210000
sp|Q04697|GSF2_YEAST	GSF2	sp|Q04697|GSF2_YEAST	70735000	117740000	99218000	62866000	68632000	47390000	59028000	147640000	62854000	58102000	62962000	74656000	52407000	168750000	112520000	93942000	100230000	72277000	70046000	132720000	138350000	76131000	82314000	70295000
sp|Q04728|ARGJ_YEAST	ARGJ	sp|Q04728|ARGJ_YEAST	25093000	0	0	0	0	0	0	0	0	0	0	0	0	0	0	0	0	0	0	0	0	0	0	0
sp|Q04748|SOV1_YEAST	SOV1	sp|Q04748|SOV1_YEAST	0	37629000	20962000	20947000	0	13758000	0	34552000	0	21440000	20426000	0	0	16821000	17244000	14301000	0	0	0	15697000	0	17585000	14086000	0
sp|Q04767|TVP18_YEAST	TVP18	sp|Q04767|TVP18_YEAST	0	0	0	0	0	0	14392000	0	0	0	0	0	0	0	0	0	0	0	28963000	0	0	0	0	0
sp|Q04792|DCE_YEAST	DCE	sp|Q04792|DCE_YEAST	0	0	0	0	0	0	0	0	0	0	0	0	0	0	0	0	0	0	1572400	0	0	0	0	0
sp|Q04869|YM94_YEAST	YM94	sp|Q04869|YM94_YEAST	33091000	0	0	0	0	0	48231000	0	0	0	0	0	26720000	0	0	0	0	0	32606000	0	0	0	0	0
sp|Q04935|COX20_YEAST	COX20	sp|Q04935|COX20_YEAST	0	0	0	0	0	35138000	20648000	0	0	0	0	44234000	0	0	0	35904000	0	0	0	0	0	0	40640000	0
sp|Q04947|RTN1_YEAST	RTN1	sp|Q04947|RTN1_YEAST	427140000	376900000	248800000	185670000	160420000	124940000	488510000	310780000	158510000	149070000	150100000	176750000	359420000	546030000	324150000	238500000	238690000	177160000	396050000	449350000	320770000	218890000	233840000	181450000
sp|Q04952|FKS3_YEAST	FKS3	sp|Q04952|FKS3_YEAST	152430000	364490000	413730000	353990000	373320000	388830000	94325000	466250000	275800000	330870000	430840000	472340000	172050000	451940000	298660000	329630000	399430000	333710000	151690000	447940000	276990000	266380000	232610000	175010000
sp|Q04969|SPC2_YEAST	SPC2	sp|Q04969|SPC2_YEAST	0	0	0	0	0	0	0	0	0	0	0	0	0	16706000	0	0	0	0	0	0	0	0	0	0
sp|Q04991|FMP42_YEAST	FMP42	sp|Q04991|FMP42_YEAST	0	0	33252000	22993000	22232000	0	23981000	55447000	0	18715000	11937000	0	0	0	52382000	21802000	21288000	0	23186000	28846000	0	19529000	21141000	0
sp|Q05016|YM71_YEAST	YM71	sp|Q05016|YM71_YEAST	253870000	5576600	0	40473000	0	12994000	350110000	6274500	0	37383000	23738000	0	175860000	11303000	0	16555000	12182000	0	153490000	0	0	16448000	13076000	0
sp|Q05022|RRP5_YEAST	RRP5	sp|Q05022|RRP5_YEAST	93122000	274350000	501620000	1283900000	454500000	311610000	81900000	335580000	317240000	1413800000	637610000	247500000	202020000	327440000	864090000	1457600000	331920000	90825000	250490000	369430000	386140000	1325600000	409010000	119340000
sp|Q05024|TRI1_YEAST	TRI1	sp|Q05024|TRI1_YEAST	0	39162000	60204000	27903000	24819000	0	0	39278000	0	34034000	31277000	19775000	0	33482000	51969000	41453000	27109000	18256000	24003000	26851000	0	30087000	27942000	0
sp|Q05029|BCH1_YEAST	BCH1	sp|Q05029|BCH1_YEAST	55853000	0	0	0	0	0	36002000	0	0	9779000	0	0	35227000	0	0	0	0	0	67044000	0	0	9023400	0	0
sp|Q05040|FAR8_YEAST	FAR8	sp|Q05040|FAR8_YEAST	0	14348000	13500000	12530000	18282000	27348000	12117000	0	0	0	0	19210000	15435000	10770000	8721600	0	20140000	15576000	0	0	0	11907000	17913000	15776000
sp|Q05050|EIS1_YEAST	EIS1	sp|Q05050|EIS1_YEAST	57442000	11935000	16284000	50013000	230130000	1420000000	64670000	16538000	0	6351400	220350000	889110000	28812000	3339400	12530000	53980000	197630000	1066500000	38797000	13500000	0	47010000	413580000	1311600000
sp|Q05123|ARP9_YEAST	ARP9	sp|Q05123|ARP9_YEAST	23314000	15463000	0	0	0	0	18713000	0	0	0	0	0	0	18114000	0	0	0	0	25907000	0	0	0	0	0
sp|Q05359|ERP1_YEAST	ERP1	sp|Q05359|ERP1_YEAST	20053000	193160000	90227000	227930000	239460000	412750000	0	245710000	171810000	189300000	315160000	512890000	0	215020000	127120000	290320000	483930000	524680000	0	237340000	175530000	249000000	394610000	374720000
sp|Q05506|SYRC_YEAST	SYRC	sp|Q05506|SYRC_YEAST	662840000	24211000	3281600	0	0	0	533850000	36124000	0	2742200	5286900	0	719710000	9011100	21278000	9562900	0	2506600	676990000	24080000	5317900	4435000	0	0
sp|Q05515|SVF1_YEAST	SVF1	sp|Q05515|SVF1_YEAST	35645000	0	0	0	0	0	31845000	0	0	0	0	0	43561000	0	0	0	0	0	38003000	0	0	0	0	0
sp|Q05521|DPP1_YEAST	DPP1	sp|Q05521|DPP1_YEAST	0	0	0	0	42301000	68033000	0	0	0	0	32066000	46061000	0	41147000	0	26349000	48007000	33903000	0	0	0	31187000	47279000	28872000
sp|Q05567|SGPL_YEAST	SGPL	sp|Q05567|SGPL_YEAST	43026000	29003000	0	18828000	0	20460000	41051000	23154000	0	20775000	0	29769000	48446000	38525000	0	45488000	42156000	35794000	41805000	30667000	0	33868000	24761000	27033000
sp|Q05568|PEX10_YEAST	PEX10	sp|Q05568|PEX10_YEAST	0	0	0	0	0	0	0	0	0	0	0	0	0	0	0	0	0	0	0	0	0	0	0	11266000
sp|Q05779|COQ9_YEAST	COQ9	sp|Q05779|COQ9_YEAST	9166700	0	0	0	0	0	11709000	0	0	0	0	0	17576000	0	0	0	0	0	14456000	0	0	0	0	0
sp|Q05788|PNPH_YEAST	PNPH	sp|Q05788|PNPH_YEAST	0	0	0	0	0	0	0	0	0	0	0	0	0	0	0	0	0	0	3786900	0	0	0	0	0
sp|Q05867|YL283_YEAST	YL283	sp|Q05867|YL283_YEAST	0	0	0	0	0	0	0	0	0	0	0	0	0	0	0	0	0	0	0	0	0	0	13266000	0
sp|Q05871|ECI1_YEAST	ECI1	sp|Q05871|ECI1_YEAST	0	0	0	0	0	0	0	0	0	0	0	0	0	0	0	0	0	0	6771500	0	0	0	0	0
sp|Q05874|NNT1_YEAST	NNT1	sp|Q05874|NNT1_YEAST	14649000	0	0	0	0	0	14144000	0	0	0	0	0	18897000	0	0	0	0	0	20431000	0	0	0	0	0
sp|Q05902|ECM38_YEAST	ECM38	sp|Q05902|ECM38_YEAST	28158000	0	0	0	0	0	32698000	0	0	0	0	0	0	0	0	0	0	0	33955000	0	0	0	0	0
sp|Q05911|PUR8_YEAST	PUR8	sp|Q05911|PUR8_YEAST	792220000	187840000	64411000	13524000	16868000	0	720930000	207020000	79767000	24495000	24820000	15719000	1387600000	139390000	36470000	14168000	0	0	708460000	135580000	49027000	10652000	10176000	0
sp|Q05931|HSP7Q_YEAST	HSP7Q	sp|Q05931|HSP7Q_YEAST	30580000	0	0	0	0	0	27959000	0	0	0	0	0	25279000	0	0	0	0	0	20054000	0	0	0	0	0
sp|Q05933|ARPC3_YEAST	ARPC3	sp|Q05933|ARPC3_YEAST	105730000	0	0	0	0	0	51451000	0	0	0	0	0	65716000	0	0	26658000	0	0	84092000	0	0	26859000	0	0
sp|Q05946|UTP13_YEAST	UTP13	sp|Q05946|UTP13_YEAST	0	2138700	41484000	730870000	174210000	8739500	0	0	0	747600000	230650000	31346000	0	0	99982000	740010000	100110000	12650000	0	0	42455000	663720000	155050000	29763000
sp|Q05948|YL225_YEAST	YL225	sp|Q05948|YL225_YEAST	0	0	0	0	0	0	0	0	0	0	0	0	0	0	0	0	0	0	3785600	0	0	0	0	0
sp|Q05949|BUR2_YEAST	BUR2	sp|Q05949|BUR2_YEAST	0	0	0	0	0	0	0	0	0	0	0	0	0	0	0	0	0	0	6555000	0	0	0	0	0
sp|Q05979|KYNU_YEAST	KYNU	sp|Q05979|KYNU_YEAST	29763000	16862000	0	0	0	13819000	56906000	0	0	0	0	0	27878000	0	0	0	0	0	23779000	0	0	0	0	0
sp|Q06001|FAR10_YEAST	FAR10	sp|Q06001|FAR10_YEAST	0	0	0	0	0	7554900	0	0	0	0	0	0	0	0	0	0	0	0	0	0	0	0	0	0
sp|Q06010|STE23_YEAST	STE23	sp|Q06010|STE23_YEAST	20337000	0	0	0	0	0	17548000	0	0	0	0	0	38060000	0	0	0	0	0	35047000	0	0	0	0	0
sp|Q06053|DUS3_YEAST	DUS3	sp|Q06053|DUS3_YEAST	0	0	0	0	0	0	0	0	0	0	0	0	0	0	0	0	0	0	4223800	0	0	0	0	0
sp|Q06058|FLD1_YEAST	FLD1	sp|Q06058|FLD1_YEAST	0	0	0	0	0	0	0	0	0	0	0	0	0	29192000	0	0	0	0	0	30669000	0	0	0	0
sp|Q06078|UTP21_YEAST	UTP21	sp|Q06078|UTP21_YEAST	0	4922900	107840000	660120000	92151000	38836000	0	17403000	53826000	745490000	216700000	18832000	0	24553000	314220000	784360000	62204000	25348000	10344000	12692000	95589000	546900000	147620000	42869000
sp|Q06089|YP098_YEAST	YP098	sp|Q06089|YP098_YEAST	0	0	0	0	0	0	0	0	0	0	0	0	0	0	0	0	0	0	0	35693000	0	0	0	0
sp|Q06090|RM51_YEAST	RM51	sp|Q06090|RM51_YEAST	0	89763000	5079500000	477970000	499900000	113190000	0	139160000	4199400000	683950000	538610000	187910000	0	73970000	1342800000	342390000	342300000	159640000	0	64173000	1203000000	244350000	412650000	234080000
sp|Q06103|RPN7_YEAST	RPN7	sp|Q06103|RPN7_YEAST	202520000	159750000	75134000	0	38620000	0	163750000	266500000	75833000	90814000	35241000	0	180380000	306280000	80447000	90048000	0	0	206120000	314030000	69087000	32344000	0	54814000
sp|Q06104|YPR09_YEAST	YPR09	sp|Q06104|YPR09_YEAST	0	0	0	0	0	0	0	0	0	0	0	0	0	4746900	0	0	0	0	0	0	0	0	0	0
sp|Q06107|YP114_YEAST	YP114	sp|Q06107|YP114_YEAST	0	0	0	0	0	0	0	0	0	0	0	0	0	0	0	0	0	0	0	0	0	0	0	3495700
sp|Q06137|YL345_YEAST	YL345	sp|Q06137|YL345_YEAST	15086000	0	0	0	0	0	16669000	0	0	0	0	0	19232000	11386000	0	0	0	0	15883000	0	0	0	0	0
sp|Q06142|IMB1_YEAST	IMB1	sp|Q06142|IMB1_YEAST	36518000	52030000	0	0	0	0	75352000	0	0	0	0	0	68566000	109890000	0	63414000	0	52413000	57697000	57791000	0	23500000	0	0
sp|Q06143|DIC1_YEAST	DIC1	sp|Q06143|DIC1_YEAST	0	0	0	13906000	29872000	0	0	0	0	19391000	27784000	47472000	0	0	44487000	43588000	57676000	57797000	28882000	0	0	0	102700000	96993000
sp|Q06144|ORM2_YEAST	ORM2	sp|Q06144|ORM2_YEAST	0	0	0	0	0	33181000	0	0	0	17907000	0	20214000	0	0	0	13892000	34877000	24178000	0	0	0	14404000	16939000	0
sp|Q06147|LCB5_YEAST	LCB5	sp|Q06147|LCB5_YEAST	0	0	0	0	0	0	0	0	0	0	0	0	0	0	0	0	0	0	0	0	0	0	8236000	0
sp|Q06151|DCPS_YEAST	DCPS	sp|Q06151|DCPS_YEAST	345860000	22872000	14858000	7098200	12183000	4970000	509420000	13668000	0	32509000	15417000	0	451270000	20675000	19184000	22485000	21702000	0	390100000	9113400	20329000	15906000	7734500	14127000
sp|Q06159|YL312_YEAST	YL312	sp|Q06159|YL312_YEAST	0	0	0	0	0	0	0	0	0	0	0	0	0	0	0	0	0	0	0	0	0	0	0	5329600
sp|Q06168|SFH1_YEAST	SFH1	sp|Q06168|SFH1_YEAST	0	0	0	0	0	0	0	0	0	0	0	0	0	0	0	0	0	0	9384100	0	0	0	0	0
sp|Q06169|PEX30_YEAST	PEX30	sp|Q06169|PEX30_YEAST	15956000	19532000	24159000	0	0	0	22597000	30366000	0	0	0	0	20676000	44552000	29271000	22339000	22411000	0	20661000	52204000	0	0	24736000	0
sp|Q06201|GMC2_YEAST	GMC2	sp|Q06201|GMC2_YEAST	41290000	0	0	0	0	0	76677000	0	0	0	0	0	86628000	0	0	0	0	0	63584000	0	0	0	0	0
sp|Q06204|YL446_YEAST	YL446	sp|Q06204|YL446_YEAST	0	0	0	0	0	0	0	0	0	0	0	0	0	0	0	0	0	0	4241000	0	0	0	0	0
sp|Q06205|FKBP4_YEAST	FKBP4	sp|Q06205|FKBP4_YEAST	0	0	0	0	0	0	0	0	0	0	0	0	0	0	0	0	0	0	5918700	0	0	0	0	0
sp|Q06217|SMD2_YEAST	SMD2	sp|Q06217|SMD2_YEAST	0	0	0	0	0	0	0	63675000	73648000	0	0	0	0	59935000	45461000	0	0	0	0	0	0	0	0	0
sp|Q06287|NEP1_YEAST	NEP1	sp|Q06287|NEP1_YEAST	7726000	0	53356000	259250000	39496000	0	8019500	6892600	51205000	421040000	159300000	0	12393000	0	171540000	488280000	40721000	0	10050000	0	70138000	529340000	43515000	13981000
sp|Q06336|GGA1_YEAST	GGA1	sp|Q06336|GGA1_YEAST	52633000	0	0	0	0	0	56394000	0	0	0	0	0	47147000	16892000	0	0	0	0	39735000	18912000	0	0	0	0
sp|Q06385|VPS74_YEAST	VPS74	sp|Q06385|VPS74_YEAST	9885700	0	0	0	0	0	7117100	0	0	0	0	0	0	0	0	0	0	0	0	0	0	0	0	0
sp|Q06390|MRB1_YEAST	MRB1	sp|Q06390|MRB1_YEAST	0	0	0	0	0	0	0	0	0	0	0	0	0	0	0	0	0	0	1634100	0	0	0	0	0
sp|Q06405|ATPK_YEAST	ATPK	sp|Q06405|ATPK_YEAST	76166000	980920000	392480000	0	0	209230000	84521000	904380000	83015000	0	0	0	391240000	2410600000	717650000	851920000	267360000	439510000	292000000	2031700000	566460000	353870000	307170000	0
sp|Q06406|LSM6_YEAST	LSM6	sp|Q06406|LSM6_YEAST	17738000	0	0	0	0	0	20264000	0	0	0	0	0	0	0	0	0	0	0	0	0	0	0	0	0
sp|Q06408|ARO10_YEAST	ARO10	sp|Q06408|ARO10_YEAST	46624000	0	0	0	0	0	74825000	0	0	0	0	0	53939000	0	0	0	19372000	21212000	95069000	0	0	28128000	25547000	0
sp|Q06436|MAG2_YEAST	MAG2	sp|Q06436|MAG2_YEAST	0	0	0	0	0	0	0	0	0	0	0	0	0	0	9336000	0	0	0	0	0	0	0	0	0
sp|Q06440|CORO_YEAST	CORO	sp|Q06440|CORO_YEAST	258320000	29558000	0	34071000	0	22372000	263370000	0	0	0	0	0	79830000	0	0	10446000	0	11913000	83942000	0	0	10618000	0	0
sp|Q06485|ATG33_YEAST	ATG33	sp|Q06485|ATG33_YEAST	0	0	0	0	0	27187000	0	0	0	0	0	8018000	0	0	0	142110000	541100000	430480000	0	0	0	0	88178000	0
sp|Q06489|MTNA_YEAST	MTNA	sp|Q06489|MTNA_YEAST	0	0	0	0	0	0	387830000	0	0	0	0	0	0	0	0	0	0	0	493990000	0	0	0	0	0
sp|Q06493|YLH47_YEAST	YLH47	sp|Q06493|YLH47_YEAST	42431000	0	0	0	0	0	32611000	0	0	0	0	0	30137000	0	0	0	0	0	25345000	0	0	0	0	0
sp|Q06494|PLR1_YEAST	PLR1	sp|Q06494|PLR1_YEAST	57262000	44005000	0	0	0	0	50574000	0	0	0	0	0	46349000	62595000	71047000	9972200	0	0	34471000	0	0	0	0	0
sp|Q06505|IWS1_YEAST	IWS1	sp|Q06505|IWS1_YEAST	29787000	0	0	0	0	0	28779000	0	0	0	0	0	35818000	0	0	0	0	0	30847000	0	0	0	0	0
sp|Q06506|RRP9_YEAST	RRP9	sp|Q06506|RRP9_YEAST	21637000	0	111190000	758890000	175260000	63835000	0	16128000	28921000	536460000	230790000	59074000	0	79289000	254090000	642870000	112540000	39964000	40726000	32136000	51379000	474100000	134180000	51470000
sp|Q06512|NOC4_YEAST	NOC4	sp|Q06512|NOC4_YEAST	0	0	29657000	141180000	38388000	0	0	0	0	172090000	53108000	0	0	0	35969000	194310000	28352000	0	0	0	0	144500000	31390000	14380000
sp|Q06523|YP148_YEAST	YP148	sp|Q06523|YP148_YEAST	48107000	0	0	0	0	12130000	46958000	0	0	0	0	0	33711000	0	0	0	0	12421000	31243000	0	0	0	0	0
sp|Q06538|CSC1_YEAST	CSC1	sp|Q06538|CSC1_YEAST	0	0	14345000	0	0	0	0	0	0	0	0	0	0	0	0	0	0	0	0	0	0	0	0	0
sp|Q06592|HPA2_YEAST	HPA2	sp|Q06592|HPA2_YEAST	141500000	64404000	0	0	0	0	137600000	64448000	0	0	0	22847000	69728000	0	0	0	0	0	82399000	0	0	0	0	0
sp|Q06608|PDXH_YEAST	PDXH	sp|Q06608|PDXH_YEAST	0	0	0	0	0	0	42305000	0	0	0	0	0	0	0	0	0	0	0	0	0	0	0	0	0
sp|Q06625|GDE_YEAST	GDE	sp|Q06625|GDE_YEAST	272420000	128260000	65419000	52324000	53901000	18852000	279590000	113000000	61156000	72656000	60146000	40991000	317420000	117010000	104460000	51411000	0	0	334560000	73048000	22936000	89540000	44237000	0
sp|Q06630|MHR1_YEAST	MHR1	sp|Q06630|MHR1_YEAST	0	0	3554700000	375540000	313000000	88962000	0	0	4038700000	524480000	771900000	157280000	0	0	1138900000	266530000	282210000	315990000	0	24851000	994670000	211920000	329730000	246750000
sp|Q06631|BFR2_YEAST	BFR2	sp|Q06631|BFR2_YEAST	27944000	26767000	66680000	589410000	126230000	18502000	0	77754000	35136000	572620000	246270000	34410000	0	36869000	259370000	961520000	112090000	0	0	71499000	57189000	561840000	150010000	33820000
sp|Q06636|GPI11_YEAST	GPI11	sp|Q06636|GPI11_YEAST	0	0	0	0	0	0	0	0	0	0	0	0	0	0	0	0	0	0	0	0	0	0	0	30264000
sp|Q06668|OMS1_YEAST	OMS1	sp|Q06668|OMS1_YEAST	64994000	106100000	269420000	109410000	111120000	129330000	69482000	117030000	0	103340000	113400000	147380000	41043000	32190000	120730000	47037000	64475000	69768000	43598000	47926000	0	80028000	69438000	57300000
sp|Q06672|TSR2_YEAST	TSR2	sp|Q06672|TSR2_YEAST	0	0	0	0	0	0	0	0	0	0	0	0	0	0	0	0	0	0	4817500	0	0	0	0	0
sp|Q06674|HIM1_YEAST	HIM1	sp|Q06674|HIM1_YEAST	0	0	0	0	0	0	0	0	0	0	0	0	0	0	0	0	0	0	0	0	0	2032900	0	0
sp|Q06678|RM35_YEAST	RM35	sp|Q06678|RM35_YEAST	0	206550000	8491200000	1116400000	1136100000	291100000	24404000	169670000	5755200000	1291000000	1423900000	486340000	0	252730000	2340700000	692360000	886020000	491650000	26374000	204900000	1884100000	655330000	1118200000	701840000
sp|Q06679|UTP4_YEAST	UTP4	sp|Q06679|UTP4_YEAST	0	0	129810000	675050000	225760000	40707000	0	0	94763000	702000000	274600000	51170000	0	16989000	322960000	839580000	161670000	49683000	0	14620000	109210000	816800000	222530000	51492000
sp|Q06682|UBX5_YEAST	UBX5	sp|Q06682|UBX5_YEAST	25168000	0	0	0	0	0	22343000	0	0	0	0	0	30293000	0	0	0	0	0	30051000	0	0	0	0	0
sp|Q06685|VIP1_YEAST	VIP1	sp|Q06685|VIP1_YEAST	0	0	0	0	0	0	0	0	0	0	0	0	0	0	0	0	0	0	7368600	0	0	0	0	0
sp|Q06686|CTR3_YEAST	CTR3	sp|Q06686|CTR3_YEAST	35536000	60779000	81817000	0	0	48042000	30930000	98552000	42926000	19773000	0	0	24426000	264290000	208930000	115370000	88737000	83082000	83066000	286160000	221210000	147820000	185370000	138190000
sp|Q06698|YL419_YEAST	YL419	sp|Q06698|YL419_YEAST	0	500320000	277650000	137370000	381630000	853600000	0	249700000	0	127110000	680540000	493670000	79326000	11830000	26204000	197280000	335260000	766570000	18158000	4703100	0	133120000	387090000	816640000
sp|Q06703|CDA2_YEAST	CDA2	sp|Q06703|CDA2_YEAST	0	0	0	0	0	0	0	0	0	0	0	0	0	0	0	0	0	0	0	0	0	0	0	0
sp|Q06705|CSR1_YEAST	CSR1	sp|Q06705|CSR1_YEAST	0	0	0	0	0	0	0	0	0	0	0	0	0	0	0	0	0	0	24507000	0	0	0	0	0
sp|Q06706|ELP1_YEAST	ELP1	sp|Q06706|ELP1_YEAST	16428000	0	0	0	0	0	16372000	0	0	0	0	0	16923000	0	0	0	0	0	25366000	0	0	0	0	0
sp|Q06708|VAC14_YEAST	VAC14	sp|Q06708|VAC14_YEAST	0	0	0	0	0	0	0	0	0	0	0	0	0	36545000	0	0	0	0	12988000	28283000	0	0	0	0
sp|Q06709|REH1_YEAST	REH1	sp|Q06709|REH1_YEAST	0	0	642820000	275120000	32402000	74728000	0	0	227950000	311980000	37048000	45653000	0	0	358260000	50522000	0	0	0	0	464310000	112230000	0	0
sp|Q06833|YP091_YEAST	YP091	sp|Q06833|YP091_YEAST	0	0	0	7245200	7117100	0	0	15714000	0	0	0	0	0	20988000	0	10067000	6895900	0	0	13255000	0	8541600	0	0
sp|Q06839|YP097_YEAST	YP097	sp|Q06839|YP097_YEAST	0	0	0	0	0	0	0	0	0	0	0	0	0	0	0	0	0	0	1898300	0	0	0	0	0
sp|Q06892|POS5_YEAST	POS5	sp|Q06892|POS5_YEAST	10664000	0	0	0	0	0	11139000	0	0	0	0	0	19458000	0	0	0	0	0	11846000	0	0	0	0	0
sp|Q07349|YD027_YEAST	YD027	sp|Q07349|YD027_YEAST	11641000	0	0	0	13296000	26662000	10358000	18117000	0	12374000	15491000	0	7053600	31779000	0	14646000	0	0	13138000	0	0	0	22633000	0
sp|Q07376|MCH1_YEAST	MCH1	sp|Q07376|MCH1_YEAST	20541000	0	0	23559000	0	17777000	19795000	0	0	20805000	20773000	0	22056000	29174000	0	22436000	23284000	22851000	18992000	0	0	18559000	0	0
sp|Q07379|YD057_YEAST	YD057	sp|Q07379|YD057_YEAST	0	0	0	0	0	0	0	0	0	0	0	0	0	0	0	0	0	0	2080700	0	0	0	0	0
sp|Q07418|PEX19_YEAST	PEX19	sp|Q07418|PEX19_YEAST	25365000	0	0	0	0	0	32188000	0	0	0	0	0	27402000	0	0	0	0	0	0	0	0	0	0	0
sp|Q07451|YET3_YEAST	YET3	sp|Q07451|YET3_YEAST	139540000	39276000	0	199300000	157250000	269020000	42110000	135520000	0	119670000	187440000	315930000	147700000	0	0	163610000	291360000	250940000	146730000	36827000	0	115350000	179980000	118140000
sp|Q07478|SUB2_YEAST	SUB2	sp|Q07478|SUB2_YEAST	530890000	105870000	37197000	21517000	18117000	14232000	448970000	84596000	38684000	13217000	6167600	28671000	618720000	155320000	53368000	58096000	29489000	20098000	547460000	110720000	49153000	33682000	18041000	10022000
sp|Q07500|NDH2_YEAST	NDH2	sp|Q07500|NDH2_YEAST	127860000	58286000	61217000	51865000	34751000	35450000	94768000	62930000	0	31726000	0	0	206050000	41582000	40250000	34037000	62560000	64715000	167960000	29917000	0	44730000	47246000	46016000
sp|Q07505|DLHH_YEAST	DLHH	sp|Q07505|DLHH_YEAST	59420000	24108000	37409000	21330000	0	0	71630000	54442000	0	16846000	21727000	0	47712000	65719000	40516000	30903000	24149000	0	36730000	31286000	0	27852000	19928000	0
sp|Q07549|SNA4_YEAST	SNA4	sp|Q07549|SNA4_YEAST	0	0	0	0	0	0	0	0	0	0	0	0	0	0	0	0	0	0	0	0	0	0	0	104550000
sp|Q07551|KAR_YEAST	KAR	sp|Q07551|KAR_YEAST	15755000	0	0	0	0	0	21952000	0	0	0	0	0	11158000	0	0	0	0	0	12172000	0	0	0	0	0
sp|Q07589|YD144_YEAST	YD144	sp|Q07589|YD144_YEAST	32718000	19368000	0	0	0	0	39609000	20608000	0	0	0	0	30239000	45132000	32077000	0	0	0	24525000	27523000	0	0	0	0
sp|Q07623|NOP6_YEAST	NOP6	sp|Q07623|NOP6_YEAST	0	0	0	0	0	0	0	0	0	0	0	0	0	0	0	40423000	0	0	0	0	0	0	0	0
sp|Q07651|FMP45_YEAST	FMP45	sp|Q07651|FMP45_YEAST	0	30936000	0	28463000	96443000	335500000	0	0	0	22927000	28738000	124730000	0	29388000	25889000	22067000	35059000	173060000	0	26902000	0	28851000	40205000	158650000
sp|Q07657|SHS1_YEAST	SHS1	sp|Q07657|SHS1_YEAST	16493000	0	0	0	0	0	31890000	0	0	0	0	0	0	10087000	0	0	0	0	17267000	9150800	0	0	0	0
sp|Q07716|AIM6_YEAST	AIM6	sp|Q07716|AIM6_YEAST	13123000	5680500	0	0	13299000	9885500	18317000	9420400	0	10119000	13062000	0	32916000	14114000	0	0	17541000	8053100	34779000	6143000	0	13134000	13725000	0
sp|Q07732|ADY3_YEAST	ADY3	sp|Q07732|ADY3_YEAST	42466000	265150000	757720000	622030000	695890000	604560000	75212000	346440000	323530000	593410000	858980000	673390000	134990000	827650000	1251900000	1503400000	1076600000	1025600000	0	531270000	491870000	1039900000	1104800000	703930000
sp|Q07807|PUF3_YEAST	PUF3	sp|Q07807|PUF3_YEAST	0	0	0	0	0	0	9250200	0	0	0	0	0	6191700	0	0	0	0	0	0	0	0	0	0	0
sp|Q07825|FRA1_YEAST	FRA1	sp|Q07825|FRA1_YEAST	60272000	43033000	0	36287000	0	0	41744000	27926000	0	26650000	0	0	142770000	63761000	74894000	59197000	41064000	0	58023000	35193000	0	33257000	0	0
sp|Q07878|VPS13_YEAST	VPS13	sp|Q07878|VPS13_YEAST	35845000	41573000	0	15477000	22652000	0	32309000	54688000	55862000	21913000	0	0	35380000	125180000	67537000	44625000	28596000	0	28970000	97860000	57988000	27835000	21177000	0
sp|Q07896|NOC3_YEAST	NOC3	sp|Q07896|NOC3_YEAST	0	0	122620000	56116000	37280000	0	0	0	84391000	86595000	27099000	0	0	0	82698000	47561000	0	0	0	0	60163000	28568000	0	0
sp|Q07915|RLP24_YEAST	RLP24	sp|Q07915|RLP24_YEAST	0	0	0	0	0	0	0	0	0	0	0	0	0	0	0	115660000	0	0	0	0	0	0	0	0
sp|Q07963|UBR2_YEAST	UBR2	sp|Q07963|UBR2_YEAST	0	0	0	0	0	0	0	0	0	0	5165800000	0	0	0	0	0	0	0	0	0	0	0	0	0
sp|Q08023|FMP25_YEAST	FMP25	sp|Q08023|FMP25_YEAST	17179000	0	0	0	0	0	12819000	17599000	0	0	19247000	0	0	0	0	0	0	0	0	0	0	0	0	0
sp|Q08096|RCL1_YEAST	RCL1	sp|Q08096|RCL1_YEAST	0	0	15379000	327450000	78623000	16836000	0	0	0	467280000	120020000	26590000	0	0	46842000	466500000	65176000	0	0	0	0	470370000	86108000	27537000
sp|Q08162|RRP44_YEAST	RRP44	sp|Q08162|RRP44_YEAST	14242000	0	0	0	0	0	14201000	0	0	0	0	0	17258000	0	0	0	0	0	15443000	0	0	0	0	0
sp|Q08179|MDM38_YEAST	MDM38	sp|Q08179|MDM38_YEAST	780410000	315660000	1061000000	286470000	248600000	329790000	525080000	263730000	0	204840000	278990000	606250000	245540000	208570000	373660000	251620000	278040000	167870000	319810000	0	0	184250000	167180000	193420000
sp|Q08193|GAS5_YEAST	GAS5	sp|Q08193|GAS5_YEAST	59288000	0	18543000	156160000	336530000	664290000	35504000	22901000	0	112840000	256300000	351700000	26536000	54978000	40281000	191940000	426360000	650520000	15756000	272130000	49567000	211170000	406020000	524190000
sp|Q08199|SIL1_YEAST	SIL1	sp|Q08199|SIL1_YEAST	23902000	0	0	0	0	0	21287000	0	0	0	0	0	30923000	0	0	0	0	0	21593000	0	0	0	0	0
sp|Q08208|NOP12_YEAST	NOP12	sp|Q08208|NOP12_YEAST	0	610010000	722170000	343070000	282970000	130640000	0	409480000	644250000	494190000	315400000	172370000	0	363100000	613170000	373160000	210600000	87127000	24554000	397210000	418410000	362540000	249870000	162170000
sp|Q08218|YO047_YEAST	YO047	sp|Q08218|YO047_YEAST	0	0	0	0	0	0	0	0	0	0	0	0	0	15934000	0	0	0	0	0	0	0	0	0	0
sp|Q08219|RRT8_YEAST	RRT8	sp|Q08219|RRT8_YEAST	0	0	0	0	0	0	0	0	0	0	0	0	0	0	0	0	766850	0	0	0	0	0	0	0
sp|Q08223|AIM39_YEAST	AIM39	sp|Q08223|AIM39_YEAST	0	0	0	0	0	0	0	0	0	0	0	0	0	0	0	0	0	0	0	0	0	936140	0	0
sp|Q08224|THI20_YEAST	THI20	sp|Q08224|THI20_YEAST	25958000	0	0	0	5034400	0	30587000	6699700	0	0	0	0	34685000	20416000	19991000	13587000	0	9504900	30603000	18868000	0	0	8157000	10448000
sp|Q08225|DPP3_YEAST	DPP3	sp|Q08225|DPP3_YEAST	94781000	35870000	0	0	0	0	88145000	0	0	0	0	0	89638000	0	0	0	0	0	85757000	0	0	0	0	0
sp|Q08230|SDHF2_YEAST	SDHF2	sp|Q08230|SDHF2_YEAST	13252000	0	0	0	0	0	51459000	0	0	0	0	0	19362000	0	0	0	0	0	0	0	0	0	0	0
sp|Q08235|BRX1_YEAST	BRX1	sp|Q08235|BRX1_YEAST	0	176110000	649520000	346700000	116750000	33323000	0	149820000	596310000	471010000	106910000	40439000	0	151400000	562980000	374860000	97947000	39634000	0	214030000	495320000	306210000	97139000	38499000
sp|Q08245|ZEO1_YEAST	ZEO1	sp|Q08245|ZEO1_YEAST	0	0	432280000	0	0	28484000	0	0	0	0	14858000	40208000	0	0	0	0	0	0	0	0	0	0	13132000	0
sp|Q08271|GAS4_YEAST	GAS4	sp|Q08271|GAS4_YEAST	9599300	0	0	0	10041000	17831000	0	0	0	0	8792300	0	0	0	16442000	0	56184000	89313000	5102000	0	0	10325000	18356000	0
sp|Q08287|NOP8_YEAST	NOP8	sp|Q08287|NOP8_YEAST	0	0	0	12474000	0	0	0	0	0	0	0	0	0	0	0	10004000	0	0	0	0	0	0	0	0
sp|Q08412|CUE5_YEAST	CUE5	sp|Q08412|CUE5_YEAST	0	0	0	0	0	0	6671400	0	0	0	0	0	0	0	0	0	0	0	0	0	0	0	0	0
sp|Q08438|VHS3_YEAST	VHS3	sp|Q08438|VHS3_YEAST	3039600	0	0	0	0	0	0	0	0	0	0	0	0	0	0	0	0	0	0	0	0	0	0	0
sp|Q08444|NOB1_YEAST	NOB1	sp|Q08444|NOB1_YEAST	0	66073000	0	0	0	0	0	38401000	0	0	0	0	0	0	0	0	0	0	0	0	0	0	0	0
sp|Q08446|SGT1_YEAST	SGT1	sp|Q08446|SGT1_YEAST	0	0	0	0	0	0	0	0	0	0	0	0	0	0	0	0	0	0	8183900	0	0	0	0	0
sp|Q08492|BUD21_YEAST	BUD21	sp|Q08492|BUD21_YEAST	0	0	0	217230000	77379000	23148000	0	0	0	210010000	92404000	0	0	0	53891000	190940000	36728000	0	0	0	0	188370000	68195000	32478000
sp|Q08548|ALE1_YEAST	ALE1	sp|Q08548|ALE1_YEAST	0	89695000	63838000	57790000	63989000	83762000	0	52610000	0	41329000	50292000	74301000	0	102460000	66070000	68207000	108350000	139760000	0	103990000	78607000	64593000	115960000	83679000
sp|Q08550|MPC54_YEAST	MPC54	sp|Q08550|MPC54_YEAST	0	0	0	0	0	15480000	0	0	0	0	0	0	0	0	0	18694000	16307000	0	0	0	0	18267000	0	0
sp|Q08558|DCI1_YEAST	DCI1	sp|Q08558|DCI1_YEAST	0	0	0	0	0	0	0	0	0	0	0	0	0	0	0	0	0	0	0	0	0	0	14398000	0
sp|Q08581|SLK19_YEAST	SLK19	sp|Q08581|SLK19_YEAST	60449000	0	0	0	0	0	55227000	0	0	0	0	0	89856000	0	0	0	0	0	68688000	0	0	0	0	0
sp|Q08601|MCA1_YEAST	MCA1	sp|Q08601|MCA1_YEAST	19977000	0	0	0	0	0	0	0	0	0	0	0	0	0	0	0	0	0	0	0	0	0	0	0
sp|Q08634|YO238_YEAST	YO238	sp|Q08634|YO238_YEAST	0	0	0	0	0	0	0	0	0	0	0	0	0	0	0	0	0	0	8465400	0	0	0	0	0
sp|Q08641|AB140_YEAST	AB140	sp|Q08641|AB140_YEAST	53734000	0	0	0	0	0	58927000	0	0	0	0	0	69357000	0	0	0	0	0	59508000	0	0	0	0	0
sp|Q08647|PUS7_YEAST	PUS7	sp|Q08647|PUS7_YEAST	18312000	0	0	0	0	0	0	0	0	0	0	0	20583000	0	0	0	0	0	22878000	0	0	0	0	0
sp|Q08686|THTR_YEAST	THTR	sp|Q08686|THTR_YEAST	79611000	0	0	0	0	0	110600000	0	0	0	0	0	68665000	24729000	0	0	0	0	56174000	22204000	0	0	0	0
sp|Q08723|RPN8_YEAST	RPN8	sp|Q08723|RPN8_YEAST	255450000	201960000	34209000	17593000	10907000	11101000	181240000	247080000	27417000	24368000	11082000	0	245460000	242730000	96484000	43544000	14091000	0	249780000	227720000	37242000	29856000	12764000	8305700
sp|Q08732|HRK1_YEAST	HRK1	sp|Q08732|HRK1_YEAST	0	0	0	0	0	0	7456300	0	0	0	0	0	0	0	0	0	0	0	5160300	0	0	0	0	0
sp|Q08745|RS10A_YEAST	RS10A	sp|Q08745|RS10A_YEAST	86217000	1002600000	319390000	8119400000	6282400000	12190000000	21692000	1242600000	173200000	6302400000	4555500000	11320000000	0	978460000	978610000	4222100000	5123500000	7635100000	82107000	909510000	360190000	4799300000	6187700000	9580900000
sp|Q08746|RRS1_YEAST	RRS1	sp|Q08746|RRS1_YEAST	0	146240000	464750000	118100000	57454000	111650000	0	67278000	397450000	245040000	81837000	0	0	122820000	326840000	162690000	71423000	29967000	0	116010000	225700000	127390000	61418000	42270000
sp|Q08818|MSC6_YEAST	MSC6	sp|Q08818|MSC6_YEAST	93563000	26820000	63508000	90994000	214820000	47582000	106660000	26792000	0	127130000	376560000	72136000	31584000	43861000	0	65555000	123500000	82991000	45581000	18749000	0	65799000	178760000	98508000
sp|Q08822|ETFD_YEAST	ETFD	sp|Q08822|ETFD_YEAST	0	0	0	0	0	0	0	0	0	0	0	0	0	0	0	0	0	0	0	26029000	0	0	0	0
sp|Q08826|SNX3_YEAST	SNX3	sp|Q08826|SNX3_YEAST	0	0	0	0	0	0	0	0	0	0	0	0	0	0	0	0	0	0	15248000	0	0	0	0	0
sp|Q08911|FDH1_YEAST;sp|P0CF35|FDH2_YEAST;sp|P0CF36|YP276_YEAST	FDH1	sp|Q08911|FDH1_YEAST;sp|P0CF35|FDH2_YEAST	84932000	24073000	0	16630000	0	22188000	142190000	23114000	0	0	0	0	38804000	0	0	0	0	0	23328000	0	0	0	0	0
sp|Q08991|YP279_YEAST;sp|Q08913|YO390_YEAST	YP279	sp|Q08991|YP279_YEAST;sp|Q08913|YO390_YEAST	0	0	0	0	0	0	0	0	0	0	0	0	0	0	0	0	0	0	0	0	0	0	0	14587000
sp|Q08920|NCBP2_YEAST	NCBP2	sp|Q08920|NCBP2_YEAST	0	0	0	0	0	0	8624200	0	0	0	0	0	0	0	0	0	0	0	0	0	0	0	0	0
sp|Q08959|PGC1_YEAST	PGC1	sp|Q08959|PGC1_YEAST	0	31750000	28947000	28036000	0	0	0	0	34589000	21573000	21477000	0	0	74418000	75154000	48990000	53317000	44430000	0	76860000	0	63184000	63402000	46931000
sp|Q08960|TYW1_YEAST	TYW1	sp|Q08960|TYW1_YEAST	0	0	0	0	0	0	0	0	0	0	0	0	0	0	0	0	0	0	0	0	0	0	0	12303000
sp|Q08961|RKM1_YEAST	RKM1	sp|Q08961|RKM1_YEAST	0	0	0	0	0	0	0	0	0	0	0	0	0	1097300	0	0	0	0	0	0	0	0	0	0
sp|Q08962|NIP7_YEAST	NIP7	sp|Q08962|NIP7_YEAST	0	0	72899000	0	0	0	0	0	0	22509000	0	0	0	0	51876000	0	0	0	0	0	0	0	0	0
sp|Q08965|BMS1_YEAST	BMS1	sp|Q08965|BMS1_YEAST	0	0	96501000	534180000	106260000	3825800	0	0	68024000	775090000	197020000	0	0	0	105380000	896120000	104670000	20138000	0	0	36508000	743860000	95007000	15103000
sp|Q08968|FMP40_YEAST	FMP40	sp|Q08968|FMP40_YEAST	9305500	0	0	0	0	0	8525400	0	0	0	0	0	10379000	0	0	0	0	0	11093000	0	0	0	0	0
sp|Q08971|YP225_YEAST	YP225	sp|Q08971|YP225_YEAST	63159000	0	0	0	0	0	68849000	0	0	0	0	0	0	0	0	0	0	0	93218000	0	0	0	0	0
sp|Q08972|NEW1_YEAST	NEW1	sp|Q08972|NEW1_YEAST	22125000	0	0	0	0	0	21540000	0	0	0	0	0	30913000	0	0	0	0	0	35636000	0	0	0	0	0
sp|Q08977|YP260_YEAST	YP260	sp|Q08977|YP260_YEAST	172270000	0	0	0	0	0	98593000	35145000	0	0	0	0	102910000	0	0	0	0	0	82545000	0	0	0	0	0
sp|Q08985|SAM4_YEAST;sp|Q04898|YM99_YEAST	SAM4	sp|Q08985|SAM4_YEAST	41407000	194400000	201770000	0	0	0	51322000	0	0	0	0	0	111350000	0	0	0	0	0	68746000	0	0	0	0	0
sp|Q10740|LKHA4_YEAST	LKHA4	sp|Q10740|LKHA4_YEAST	171170000	0	183060000	112620000	0	26240000	149940000	0	0	0	85580000	0	231490000	0	0	96231000	47710000	0	223220000	0	0	174820000	0	0
sp|Q12000|TMA46_YEAST	TMA46	sp|Q12000|TMA46_YEAST	0	40526000	0	0	0	0	0	127270000	0	0	0	0	0	19660000	0	0	0	0	0	0	0	0	0	0
sp|Q12008|PMG2_YEAST	PMG2	sp|Q12008|PMG2_YEAST	11120000	0	0	0	0	0	8117700	0	0	0	0	0	8491000	0	0	0	0	0	6735700	0	0	0	0	0
sp|Q12009|TRMB_YEAST	TRMB	sp|Q12009|TRMB_YEAST	0	0	0	0	0	0	15183000	0	0	0	0	0	0	0	0	0	0	0	0	0	0	0	0	0
sp|Q12012|YO289_YEAST	YO289	sp|Q12012|YO289_YEAST	43857000	0	0	0	0	0	38141000	0	0	0	0	0	36824000	0	0	0	0	0	30550000	0	0	0	0	0
sp|Q12016|VPS68_YEAST	VPS68	sp|Q12016|VPS68_YEAST	0	0	0	0	0	0	0	0	0	0	0	0	0	0	0	0	0	0	0	0	0	0	0	15775000
sp|Q12018|CDC53_YEAST	CDC53	sp|Q12018|CDC53_YEAST	38530000	0	0	15098000	0	0	35978000	0	0	0	12012000	0	46304000	0	0	13476000	0	9599300	43939000	0	0	0	15348000	0
sp|Q12019|MDN1_YEAST	MDN1	sp|Q12019|MDN1_YEAST	0	0	1898300000	180760000	0	0	0	0	646700000	179810000	0	0	0	0	0	0	0	0	0	0	416020000	0	0	0
sp|Q12024|YTM1_YEAST	YTM1	sp|Q12024|YTM1_YEAST	106240000	42404000	578130000	470970000	58336000	21172000	0	27371000	321620000	468450000	82492000	31659000	215100000	30204000	541360000	337400000	44317000	29229000	41162000	63648000	215980000	300450000	61112000	28056000
sp|Q12028|AP1G1_YEAST	AP1G1	sp|Q12028|AP1G1_YEAST	0	0	0	0	0	0	0	0	0	0	0	0	0	0	0	0	0	0	102480000	0	0	0	0	0
sp|Q12029|FSF1_YEAST	FSF1	sp|Q12029|FSF1_YEAST	47690000	37023000	43973000	45108000	58502000	138190000	0	57677000	0	68899000	102180000	197590000	46795000	46108000	33798000	33594000	43686000	39924000	46219000	0	0	25385000	37485000	33002000
sp|Q12031|ACEB_YEAST	ACEB	sp|Q12031|ACEB_YEAST	533320000	124710000	17379000	51036000	18596000	7921000	561970000	176280000	52618000	40797000	37303000	19031000	911150000	217550000	68754000	98683000	16970000	39156000	839720000	168600000	67478000	79059000	34585000	26323000
sp|Q12032|AIM41_YEAST	AIM41	sp|Q12032|AIM41_YEAST	48391000	0	0	0	0	0	55301000	0	0	0	0	0	78756000	0	0	0	0	0	63607000	0	0	0	0	0
sp|Q12033|PALA_YEAST	PALA	sp|Q12033|PALA_YEAST	0	0	0	0	0	0	0	0	0	0	0	0	0	0	0	0	0	0	5672200	0	0	0	0	0
sp|Q12034|SLF1_YEAST	SLF1	sp|Q12034|SLF1_YEAST	0	0	0	0	0	0	2111600	0	0	0	0	0	0	0	0	0	0	0	0	0	0	0	0	0
sp|Q12035|FCF2_YEAST	FCF2	sp|Q12035|FCF2_YEAST	0	0	0	275800000	72293000	0	0	0	0	261290000	79709000	0	0	0	97372000	321390000	51218000	0	0	0	0	214470000	56774000	0
sp|Q12044|RCN2_YEAST	RCN2	sp|Q12044|RCN2_YEAST	0	0	0	0	0	0	0	0	0	0	0	0	0	0	0	0	0	0	8239300	0	0	0	0	0
sp|Q12051|GGPPS_YEAST	GGPPS	sp|Q12051|GGPPS_YEAST	0	0	0	0	0	0	0	0	0	0	0	0	0	0	0	0	0	0	4802100	0	0	0	0	0
sp|Q12055|KAD6_YEAST	KAD6	sp|Q12055|KAD6_YEAST	9566300	0	0	0	0	0	0	0	0	0	0	0	0	0	0	0	0	0	0	0	0	0	0	0
sp|Q12060|HFI1_YEAST	HFI1	sp|Q12060|HFI1_YEAST	0	0	0	0	0	0	0	0	0	0	0	0	0	0	0	0	0	0	0	3623300	0	0	0	0
sp|Q12063|UPPS_YEAST	UPPS	sp|Q12063|UPPS_YEAST	24334000	57193000	41416000	23374000	29475000	30342000	18796000	30327000	44667000	16237000	25648000	29507000	23000000	57782000	49003000	44752000	28647000	42525000	26314000	38635000	45898000	18263000	0	25255000
sp|Q12068|GRE2_YEAST	GRE2	sp|Q12068|GRE2_YEAST	26991000	0	0	0	0	0	40969000	0	0	0	0	0	0	0	0	0	0	0	28306000	0	0	0	0	0
sp|Q12074|SPEE_YEAST	SPEE	sp|Q12074|SPEE_YEAST	231230000	0	551920000	0	35391000	0	395010000	49062000	0	28305000	33169000	0	385470000	45080000	45681000	39632000	31445000	40743000	505430000	0	36691000	35886000	34919000	0
sp|Q12078|SMF3_YEAST	SMF3	sp|Q12078|SMF3_YEAST	15740000	0	0	15394000	18595000	18169000	0	17745000	0	15160000	20899000	0	15832000	27693000	26464000	47389000	30039000	37334000	21558000	21864000	0	38452000	27842000	0
sp|Q12090|REXO3_YEAST	REXO3	sp|Q12090|REXO3_YEAST	0	0	0	0	0	0	0	0	0	0	0	0	0	0	0	0	0	0	0	0	0	0	0	13356000
sp|Q12096|GNT1_YEAST	GNT1	sp|Q12096|GNT1_YEAST	0	0	29284000	25132000	35194000	67593000	0	0	0	22403000	20547000	40130000	17909000	0	0	28164000	110990000	116700000	0	0	0	29811000	97276000	90365000
sp|Q12100|RTK1_YEAST	RTK1	sp|Q12100|RTK1_YEAST	0	0	0	0	0	0	0	0	0	0	0	0	0	0	0	0	0	0	7727400	0	0	0	0	0
[truncated: 143 more rows]
