# Supplementary material for: Bidirectional promoter activity from expression cassettes can drive off-target repression of neighboring gene translation
Source: eLife. 2022 Dec 12;11:e81086. doi: 10.7554/eLife.81086 (PMC9754628; doi:10.7554/eLife.81086)
Supplement: Figure 5—figure supplement 2—source data 1. [file elife-81086-fig5-figsupp2-data1.xlsx]

## Sheet: RPKM 6h SPO
gene_name	dbp1∆_1_footprint	dbp1∆_2_footprint	Wild-type_1_footprint	Wild-type_2_footprint
YPL119C	0.577711	0.448521	164.231	146.74
YHL047C	16.1852	14.4074	17.2898	22.8497
YOR381W	0.083206	0.581392	0.545854	0.521409
YPL163C	4.30047	8.90342	8.62041	8.98295
YKR013W	2.17963	3.38442	1.98597	2.27644
YOR382W	3.46337	23.6957	16.0938	26.0438
YLR136C	49.5695	158.308	139.874	139.172
YHR216W	3.31305	3.19304	4.74662	5.1545
YBR257W	59.3502	83.0436	67.0714	77.4365
YDR534C	11.2684	43.369	37.713	51.668
YHL040C	0.947015	4.08058	4.97014	4.98495
YOR383C	5.13076	44.4813	43.0089	59.3023
YBR056W-A	4.9003	8.56007	14.7342	13.8185
YMR011W	43.9009	73.2197	67.4174	87.508
YAL065C	30.3887	9.9339	13.4071	14.6999
YPL122C	11.1894	22.9395	19.7531	24.3952
YGL194C-A	38.7003	36.275	25.8013	41.405
YER028C	1.99606	3.21858	2.35032	1.73191
YFL059W	0.825499	1.44202	0.902582	0.517298
YIR039C	7.11395	7.76686	12.3966	13.3738
YMR305C	0.622471	0.54368	0.850745	0.585106
YHL035C	0.292834	0.63942	0.680379	0.917521
YOR384W	1.97658	3.00241	2.63096	2.04641
YIL162W	89.3421	119.207	127.506	131.807
YLR056W	33.2824	36.4339	30.0219	32.3274
YEL065W	23.542	155.358	169.844	212.697
YMR058W	1.95972	10.6504	11.3258	13.5671
YER145C	11.8148	36.749	25.9996	42.3606
YCR006C	4.58959	4.85897	4.10577	5.2292
YJL210W	52.073	78.274	66.7174	79.0631
YAR010C	0.587536	4.10534	2.8908	1.10454
YMR199W	0.7648	1.39961	0.955675	1.09545
YLL031C	2.53853	2.48596	2.58633	1.22923
YHR211W	4.95165	7.53414	8.21627	8.95021
YLR303W	12.4641	12.6219	8.59152	18.1681
YNL066W	1.1487	2.34103	2.19793	2.15949
YIL123W	0.775469	1.58039	1.05985	0.728919
YAL067C	59.3841	48.3629	57.6906	61.2254
YDR046C	1.5748	3.43866	2.15231	2.96053
YJL158C	113.219	132.818	117.133	114.836
YOL158C	0.294269	0.685389	1.17974	1.72109
YLL061W	1.53134	4.16114	3.90679	3.32666
YLR327C	1655.17	3499.81	3121.45	2481.55
YLR109W	125.059	85.846	80.9996	82.7347
YBR302C	0.639762	1.30382	1.92363	1.20272
YKR052C	11.5157	22.5866	21.8686	28.1056
YMR119W-A	19.7412	21.7127	26.3812	28.8652
YDR286C	10.9096	7.0583	9.94028	6.07689
YOL086C	107.982	124.936	113.281	104.187
YDL043C	13.9867	13.0307	18.3513	15.7765
YIL057C	468.173	1223.62	1273.86	913.733
YGR296W	0.0938271	0.0364225	0.0683923	0.274384
YAR050W	0.0166991	0.0972359	0.0182584	0.020929
YDL042C	3.18113	4.69253	4.52164	4.65139
YPR164W	0.912628	1.35267	0.907134	0.987822
YKL152C	23.2334	57.0546	51.9104	50.3242
YNL331C	2.58055	2.44174	1.93979	1.6171
YFL054C	1.37748	3.52915	3.11261	3.56787
YJR160C	254.511	349.416	330.433	341.382
YLR411W	107.117	837.569	1040.18	185.283
YIL020C	22.1273	19.6728	16.3891	21.1718
YNL187W	12.4356	15.6723	14.3418	13.664
YGR062C	5.81601	13.3205	13.1421	13.3635
YOL114C	5.66346	2.93132	9.28846	5.12633
YPL148C	3.36498	7.83746	6.13199	15.4635
YFL036W	2.89622	2.61772	2.0796	1.78782
YLR307C-A	2394.59	1838.06	1611.84	1985.54
YJL222W	0.714561	0.481772	0.575684	0.659884
YGR254W	19.8357	61.2789	64.4612	51.7916
YGL039W	8.05049	11.4134	9.95035	12.2831
YOR159C	9.98028	6.25836	10.9122	6.73522
YFR053C	55.3545	71.8023	76.1946	70.3047
YLL051C	27.5014	49.5405	45.1496	51.4409
YAL063C	0.343606	0.400151	0.268351	0.27684
YLR364W	50.5412	69.289	71.3491	76.1721
YKL001C	13.2147	26.0154	25.1132	26.026
YFL055W	0.961423	1.24404	0.3504	0.669416
YER081W	57.1947	57.9643	60.5768	55.325
YDL104C	1.33215	1.72375	2.1039	1.48407
YNL311C	1.31564	1.08151	1.52311	1.16392
YMR134W	5.54656	10.1504	6.35327	11.9168
YGL229C	5.11649	6.37809	7.17011	5.419
YIL164C	0.643336	2.62222	2.81364	2.01573
YBR196C	6.8879	23.5628	21.5342	21.5815
YLR108C	2.7183	1.43892	2.70194	1.85828
YGR008C	189.566	241.394	222.764	246.464
YKR099W	19.3382	29.6324	27.98	31.3435
YAL027W	41.3994	71.7642	54.6305	60.8316
YLR382C	13.0292	17.6256	17.8433	20.5355
YOL152W	1.14965	1.33885	2.61876	2.16129
YFR052C-A	14.0435	36.7978	39.155	43.1218
YMR035W	6.19516	1.27317	4.7814	2.28364
YPL071C	12.6084	9.29944	11.0286	7.90106
YJR010W	18.9588	11.3119	10.6205	18.3341
YFR055W	0.689563	6.22356	3.95826	2.37663
YGR192C	65.1208	201.804	213.806	173.606
YDR253C	53.8962	61.9858	64.4192	58.7373
YLR214W	2.84871	14.778	16.6118	6.92419
YJR058C	57.1287	73.864	85.5796	71.0355
YOL056W	31.2222	34.9436	31.2559	39.3847
YER044C	60.703	73.8112	82.4761	59.2967
YGL090W	3.73327	3.0099	3.76789	5.03881
YDL069C	10.9673	13.4108	12.8908	12.0272
YGL134W	2.08618	3.72521	1.67272	3.48614
YNR070W	3.4179	3.57212	4.98275	4.06398
YPL255W	35.554	51.1148	47.1303	57.5727
YDR031W	11.2899	5.91652	11.1097	7.78229
YML075C	1.89147	2.8506	4.31866	3.41641
YJL212C	57.6524	79.1751	74.174	87.4283
YLL020C	16.1501	22.8964	27.6388	24.641
YLR047C	2.84871	3.71963	5.1912	4.43581
YAL060W	15.2274	29.7401	26.5348	28.2291
YHR174W	5.64766	22.2978	28.0135	19.8535
YDR393W	2.63517	2.91538	2.73718	3.13752
YOL105C	0.217688	0.507023	0.476031	0.68207
YLR055C	9.24837	10.7703	9.78577	9.34754
YJR159W	12.2653	19.4416	15.6456	19.215
YGR168C	5.1611	8.26434	8.46455	7.47908
YEL004W	147.779	193.48	189.645	156.837
YHR139C	1.12531	2.83941	5.53677	4.46612
YMR096W	13.4626	24.6025	25.5897	18.6897
YNL289W	2.43602	4.90009	5.08484	3.3306
YPR124W	107.047	116.164	121.772	83.3432
YDR125C	2.38805	2.00853	3.04622	1.82902
YJR147W	0	1.78019	3.52846	2.1287
YJR005C-A	52.91	110.548	131.865	139.45
YMR054W	73.5763	111.936	108.419	107.209
YLR034C	57.8322	58.7829	70.8592	75.6599
YCR105W	2.35702	4.31341	2.57711	1.68802
YDL059C	21.822	21.1266	19.2602	21.7478
YMR225C	16.0345	13.5805	23.1101	18.2691
YMR307W	52.887	89.4051	80.3261	94.6137
YML008C	201.367	218.846	215.327	274.775
YBR068C	10.735	10.0013	11.524	10.5187
YCR012W	72.372	118.569	114.968	109.608
YAL055W	167.014	140.355	126.692	136.706
YGL018C	40.8284	47.1409	46.9302	50.7328
YDL036C	29.3742	33.1485	29.8433	32.7421
YDR502C	84.3959	47.5807	57.9532	85.014
YJL046W	3.98621	5.50185	3.71274	5.92107
YNL184C	8.41035	26.3695	16.2693	20.2705
YNL283C	19.629	20.6426	19.9011	23.4083
YHR199C	84.2902	103	89.565	79.8505
YOR095C	19.2732	22.4448	20.2826	16.0027
YBR276C	4.96871	7.23297	7.1903	8.88301
YHR071W	24.6765	37.0393	27.8801	32.9888
YCL026C-B	15.2219	34.2977	33.2866	30.69
YLR289W	2.94331	3.53479	5.2295	3.9194
YHR096C	123.497	150.842	150.851	133.243
YJR009C	87.9314	133.251	115.25	104.44
YPL141C	10.9576	14.029	14.3621	12.539
YDR050C	78.4476	131.472	144.054	128.885
YJL218W	131.097	161.384	159.7	142.288
YNL300W	4.1623	2.42363	1.51699	3.47774
YOL136C	5.48367	6.38608	7.6612	7.44539
YGL071W	0.8581	3.99725	5.16025	5.48482
YLR120C	33.6049	35.2337	40.8636	40.0177
YLR377C	36.0522	85.8045	84.0039	89.4909
YMR095C	7.02177	11.1211	8.90584	11.9685
YLR011W	20.203	40.3892	35.3432	30.3844
YGL220W	209.221	304.73	312.906	295.082
YBR162C	8.98014	11.9959	13.2841	12.5789
YLR139C	2.58365	2.0417	2.11868	1.73469
YPL221W	7.88543	9.87615	10.4925	9.50986
YDR376W	7.04548	5.51709	6.50802	6.85092
YOR020W-A	42.9812	46.2766	54.0882	51.8354
YFL031W	296.043	416.101	501.341	597.075
YMR286W	79.0631	93.0747	94.9025	90.473
YMR303C	799.099	2077.04	2104.12	1708.22
YPR153W	61.3854	81.4621	75.9624	77.5305
YIR002C	11.3502	10.1889	9.30753	10.9652
YKL171W	100.778	163.688	145.926	143.85
YCL056C	15.6614	12.3379	15.1092	14.4326
YKR058W	6.75125	9.88398	7.38167	6.0438
YPL202C	20.7399	23.1395	21.5665	22.5396
YPR083W	21.1807	22.032	20.2356	20.618
YOR049C	7.56255	9.60772	7.3291	5.3853
YOR354C	45.5153	55.0977	51.8234	51.1467
YJL079C	7.40296	6.22643	7.19487	8.2472
YMR023C	6.01906	7.40634	8.56786	7.259
YBR293W	26.4482	44.8008	36.9429	45.6768
YKL043W	38.8282	36.9086	35.3782	30.7785
YMR063W	2.61721	1.82874	2.28928	0.328014
YLR204W	90.3921	126.898	122.526	120.272
YLR213C	1264.44	1723.93	1600.9	1608.54
YJR015W	3.75257	4.37011	4.35942	4.26217
YDL240W	2.30776	1.94846	2.0186	2.89231
YNL237W	28.9201	26.8215	31.6206	26.7331
YDR514C	11.4164	10.2604	13.7036	16.7966
YBR014C	199.021	179.661	184.417	201.194
YBR187W	41.2536	57.0343	48.9651	64.6979
YNL259C	522.472	826.997	777.612	781.766
YLR367W	31.6423	19.3308	20.4179	23.4042
YLL043W	40.2517	53.9121	54.4057	59.8018
YDR126W	2.90617	2.74984	3.17755	4.32523
YDR381C-A	24.8497	35.2915	36.4477	34.1825
YGL012W	82.9435	90.9806	91.798	83.4484
YDR084C	40.6249	49.1728	49.6646	55.7259
YPR165W	1409.46	1884.57	1771.36	1777.49
YLL009C	13.8188	9.38754	16.3683	20.2056
YNL081C	38.5405	34.6084	48.7394	33.1717
YKR051W	21.3575	24.536	32.3454	29.8419
YPL166W	44.2227	41.131	51.5972	53.5643
YDL167C	5.92236	2.10741	2.42827	2.47416
YKL114C	42.6875	53.3733	56.2616	60.7579
YDR056C	82.3435	71.3799	92.7403	92.3376
YPR029C	20.3968	25.3205	20.7527	22.9892
YBL068W-A	20.4941	11.3651	7.46925	13.4541
YDL157C	115.739	113.111	83.9401	94.7595
YIL066C	12.2608	8.51978	9.2581	10.782
YBR295W	4.90644	4.76155	5.99572	7.1741
YPR118W	6.75667	9.92123	11.5632	8.6522
YOR319W	10.0911	6.56713	5.19217	7.43949
YNL277W	46.8519	86.7249	66.8645	90.0879
YHL028W	70.0201	103.22	96.5944	88.8439
YNL268W	121.868	160.612	155.686	161.392
YHL036W	106.307	140.978	147.055	159.115
YDR473C	10.8759	10.2816	11.7516	12.0272
YOR316C	95.9642	143.527	156.938	146.216
YKL132C	3.64244	1.79463	1.83811	2.63369
YIL071C	14.2253	18.4595	11.2579	16.9795
YDR479C	113.005	179.353	173.215	169.01
YGR295C	7.95284	5.18649	6.26073	5.18298
YOL117W	3.12727	3.21344	2.71532	2.53608
YGR060W	1534.17	1668.95	1509.4	1796.11
YMR233W	42.2799	55.7162	44.4031	43.5767
YHR129C	3.31274	4.22531	5.17439	4.15185
YMR251W	20.4097	7.72955	5.98709	7.27869
YMR113W	3.5281	3.78	10.0296	4.59862
YOR084W	16.898	23.8697	16.5941	17.6486
YKL187C	42.219	24.4916	23.5974	22.3103
YNL070W	782.226	626.381	706.326	737.471
YBR122C	126.819	164.239	147.427	143.869
YBR167C	14.2757	9.42079	15.0884	19.0844
YOL096C	37.9272	31.8105	34.5931	45.5637
YDR223W	4.75537	3.74184	4.35627	3.86588
YOR344C	8.04406	12.8191	18.2848	16.1836
YBR027C	2.53092	3.68428	3.45907	0.793
YFR030W	23.1221	19.2054	19.7045	25.2855
YJR136C	23.3465	25.1869	28.0323	21.9002
YHR175W	30.1441	26.0327	31.4776	28.0162
YCL005W	33.5267	23.483	31.0791	27.0992
YGR266W	316.26	368.698	341.361	335.95
YDR066C	2.92772	1.51534	3.20111	2.8539
YJL205C	33.8697	35.4991	44.4389	46.6937
YIL030W-A	4.33387	4.32605	6.09243	3.87973
YGR150C	5.31494	5.39605	4.17217	4.6116
YLR069C	9.46709	9.48875	11.8783	11.6706
YDR383C	21.5591	16.84	22.1349	23.7248
YAL012W	14.7401	12.8743	8.89766	12.7007
YDR403W	242.565	76.5218	34.0956	41.4554
YCR090C	41.6826	42.7828	54.0719	62.4232
YDR278C	3115.94	2706.32	3209.98	3330.41
YGR189C	13.0528	12.3595	14.6717	19.111
YPL273W	3.19881	1.53391	1.44015	2.35827
YNL198C	14.9278	17.3843	10.8811	12.4726
YDR357C	54.7835	58.5907	51.9532	64.4563
YML037C	1.79372	1.88001	2.74571	1.79846
YOR363C	1.23761	1.71581	1.93311	1.10793
YML027W	2.83173	1.46566	1.37607	2.16883
YPR085C	3.12336	3.00477	3.11806	2.72313
YPR167C	15.7032	16.6249	12.487	15.8043
YGL055W	496.395	493.276	669.171	894.028
YNL326C	26.3372	39.5554	36.939	33.0083
YBR283C	5.86788	4.69804	5.48017	5.97528
YJL108C	8.85824	5.71063	5.53452	4.16325
YPR005C	10.4688	14.6299	13.5067	13.9078
YOR079C	9.40058	5.92993	7.28052	7.36357
YDR373W	51.8544	32.9387	45.6517	39.2466
YJR141W	9.1283	10.4261	12.8597	16.2807
YGL146C	34.1133	45.2384	46.1383	42.7541
YLR168C	24.2867	27.0122	36.1022	39.3306
YNR027W	7.34223	8.7755	8.02783	6.2961
YLR239C	8.01255	5.20807	7.53831	7.00612
YOL062C	4.2696	4.68809	4.26814	3.21064
YJR095W	104.516	121.051	126.534	122.891
YBR185C	8.44782	12.6859	14.5842	15.6028
YHR079C	3.04704	3.73201	4.76759	4.47727
YKR097W	1810.25	1433.05	1505.7	1834.85
YDL194W	13.4461	19.6123	19.2868	15.7674
YLR405W	2.15092	2.69757	2.89449	2.48838
YCR048W	1.87007	1.60471	2.69039	2.46711
YER058W	4.58011	6.0958	5.00779	6.56027
YLR390W	13.0016	12.2572	8.12324	15.5189
YGR055W	229.069	358.104	345.629	335.07
YHL032C	12.9343	16.7149	14.3246	13.7005
YCR069W	44.2912	36.3302	30.3195	35.2368
YGR129W	6.75667	4.78956	6.10279	4.04997
YAL038W	33.3979	60.92	64.7875	65.1117
YOR315W	14.7908	17.2248	14.8243	18.0959
YPL072W	9.83633	15.5062	13.1156	14.2823
YML058W-A	75.2046	41.0534	32.12	54.4904
YOR237W	40.2356	25.5289	27.6092	31.6474
YLR406C	14.7009	11.4134	12.0552	16.8892
YPL171C	4.53374	7.56776	5.4528	4.5457
YIL074C	329.093	475.933	439.567	455.429
YNL304W	7.66749	7.74994	7.59258	7.97782
YEL052W	4.70029	7.6633	7.19487	6.33267
YGL041W-A	111.501	131.979	117.916	144.326
YML083C	7.07105	11.0916	9.46693	8.86213
YNR016C	61.4015	64.1161	78.5091	69.2296
YER175C	15.4228	12.2134	17.5375	15.4635
YKR083C	54.5481	69.4066	56.8805	56.3378
YLR271W	20.5476	19.9847	24.4414	20.3754
YPL064C	5.71702	5.94449	4.24166	8.44461
YGR277C	40.466	48.2975	46.4459	55.51
YNL253W	10.4299	7.4874	12.6535	6.44632
YBR131W	5.54771	7.53744	7.07671	7.90106
YNR045W	11.7607	15.1228	15.4039	14.2791
YIR027C	9.27001	13.8365	16.1314	16.5271
YMR150C	27.274	35.2915	30.9253	40.5126
YOR002W	70.3007	61.1787	75.4262	68.7267
YCR095C	7.88977	5.47378	7.89233	5.04931
YDR276C	5778.65	7282.79	6720.46	6588.88
YKL174C	6.24809	4.14189	4.83462	3.61417
YPR100W	70.4266	100.304	87.4087	94.2294
YER065C	949.725	822.718	820.523	911.025
YKL094W	270.071	356.48	349.465	336.761
YKL011C	14.8256	16.8638	15.833	14.0437
YPL063W	24.6945	23.036	25.3474	25.4229
YLR388W	15.5618	18.1227	25.5223	9.75176
YOR020C	655.866	641.251	649.813	565.692
YMR244C-A	83.3195	99.3975	101.469	106.122
YOR284W	10.2819	6.58565	9.27464	8.69822
YLR259C	324.439	297.923	311.588	341.894
YLR266C	9.87784	11.995	10.0617	13.7554
YGR216C	8.88076	7.27364	7.46925	11.0079
YPL083C	10.2819	9.27977	12.0851	13.3695
YPL097W	5.35614	6.52109	8.91753	6.8654
YGL008C	19.8547	27.1497	24.8599	25.1246
YMR154C	16.5904	23.3931	24.4529	21.812
YGR146C	27.8896	49.5919	44.2653	50.3638
YAL010C	11.1756	6.08294	7.83618	7.30765
YDL214C	275.361	311.406	316.627	330.358
YIL140W	2.07684	4.00321	4.15003	4.21849
YGR201C	7.82621	8.78861	11.3075	13.3116
YJL063C	14.7233	21.1266	23.2848	20.7592
YHR080C	1.56322	1.11251	1.4718	1.2517
YPL118W	75.295	105.223	109.058	110.798
YBL043W	98.7061	150.449	154.214	134.623
YLR044C	53.5565	83.4475	74.5277	73.2242
YGL236C	1.32874	1.75372	2.03393	1.33224
YGR267C	20.5638	14.668	16.3009	19.3294
YLR231C	53.2004	38.9345	44.8229	46.8893
YBL020W	8.92208	8.57806	9.52834	10.4019
YBL080C	13.4571	15.4147	16.2815	14.6538
YBR240C	5.74449	6.37867	7.15731	8.20415
YFR040W	31.1299	35.7757	43.2496	38.8683
YBR207W	1435.85	1790.01	1678.19	1801.32
YLR176C	10.9916	9.15527	11.3813	10.0353
YOL100W	24.7772	33.9058	29.2842	30.7135
YKR020W	91.3315	101.737	99.4257	112.972
YOR127W	3.84634	2.71473	3.18599	3.1407
YJL118W	6.33364	6.03485	5.03641	2.52571
YKR098C	7.17669	5.37968	7.21549	6.30651
YBR262C	91.9933	119.464	155.579	124.419
YKL160W	28.3323	28.7374	27.4804	32.0725
YIL098C	13.9713	11.34	19.442	9.02038
YLL033W	5.73057	3.4957	4.17712	3.42005
YKL138C-A	549.299	655.787	629.551	692.765
YLR457C	5.18207	4.91728	3.56746	5.5325
YOR209C	30.1936	24.6954	29.7885	32.0333
YGR011W	12.939	9.79438	12.0251	13.7839
YJL084C	0.672777	1.56698	1.7164	1.54585
YEL047C	37.1516	27.9515	32.9433	38.4016
YLL058W	5.38504	4.34162	4.52914	6.10011
YLR182W	39.4384	52.4286	53.0782	56.1472
YGL248W	184.745	263.617	249.662	249.272
YBR044C	2.91011	0.847251	3.6364	2.86568
YKL053C-A	54.141	40.0321	62.0155	47.3906
YBR210W	13.1073	11.9934	10.2366	14.0806
YLR165C	6.12538	1.99735	5.89367	5.52738
YMR319C	0.648164	5.03218	5.43327	1.3539
YPL103C	6.28363	5.22691	5.8889	4.82158
YNL093W	16.0418	14.0113	18.7926	10.0526
YDL044C	9.98393	11.3084	11.0657	12.6842
YDR406W	5.93672	7.75573	8.03063	7.39277
YGL031C	24.1322	25.1452	30.0888	19.102
YBR164C	34.0556	36.389	35.3163	47.522
YPL156C	223.361	319.328	324.041	325.959
YAR027W	28.5227	37.873	29.4373	29.7338
YGL215W	121.806	103.601	112.97	113.661
YGR272C	5.62798	2.01666	3.31343	6.51095
YER071C	76.9508	124.081	103.552	97.791
YIL023C	10.5649	6.56184	5.7757	7.94455
YNL146W	32.6989	14.073	36.5295	22.2725
YNL211C	20.6251	22.0177	14.0944	21.5412
YPL274W	32.7427	40.6101	36.576	36.0815
YGR025W	15.6386	16.5565	19.4306	10.6908
YHR050W	55.5144	72.6206	63.549	65.6275
YDR164C	5.88036	4.66048	5.89367	6.03917
YKL033W-A	14.3283	15.7592	16.5366	17.2925
YOR205C	2.3589	2.74709	2.3447	2.15011
YCR024C-A	227.572	191.582	212.848	195.871
YPR121W	0.832963	0.606273	0.455372	0.652469
YMR173W-A	109.923	52.2498	37.6095	39.3616
YPL245W	1.58837	2.15805	1.59197	1.32714
YLL019C	33.2801	62.5711	59.1848	55.9816
YAL022C	9.71204	13.4646	13.1473	12.7517
YGL006W	21.2552	23.8233	25.2039	21.1361
YBR146W	79.5873	102.522	120.806	109.22
YAL015C	3.93958	2.82332	4.14178	3.79805
YOR086C	29.11	28.7292	30.3717	30.609
YFR011C	42.3259	35.5252	45.4444	34.4089
YOR087W	32.5635	23.3053	29.2703	32.5614
YOL029C	24.9929	29.4742	23.8676	17.446
YHL042W	8.35109	5.63048	10.5726	11.5681
YDR329C	89.9153	98.0384	95.0294	94.2223
YBR078W	90.4806	112.405	102.443	97.9355
YMR026C	8.48526	7.0583	6.9582	8.35572
YKR091W	65.6953	48.4442	55.7444	78.8389
YML104C	8.52246	10.288	10.2274	10.8766
YPL258C	6.27736	10.0833	8.87525	9.63078
YBL055C	13.8535	9.74718	13.2537	9.76642
YOL126C	1470.83	2363.37	2291.53	2551.91
YML095C	22.3079	25.2768	20.7653	23.4246
YKL182W	51.373	50.7194	65.3097	66.5874
YKL085W	648.17	948.12	925.34	838.924
YFL042C	25.6686	32.5544	34.3129	33.0518
YLR180W	15.8619	12.0069	11.273	10.9338
YBR038W	3.96462	6.53491	6.80235	5.42752
YGL226W	37.6475	48.3561	33.2936	55.51
YER067W	25.1399	26.916	23.054	33.0324
YKL068W-A	56.6026	113.651	84.2958	160.226
YBR161W	8.22551	3.75652	4.05593	5.65984
YGR028W	27.5303	24.8275	26.2466	22.9323
YDR115W	336.768	429.612	387.247	448.082
YDR229W	12.4709	13.2872	12.1849	12.3043
YER184C	0.817244	0.605648	1.29972	0.651795
YDR428C	6.89991	6.92705	7.80435	6.56027
YNR022C	21.592	24.0276	31.4776	27.0611
YBL030C	847.117	851.068	1002.65	957.186
YDL200C	25.8933	27.377	32.0363	28.609
YLR170C	79.8534	122.361	117.179	109.035
YPL087W	23.5724	25.4265	24.2948	25.1844
YBR162W-A	148.953	122.446	127.279	164.72
YPL222W	114.469	97.4235	105.49	107.328
YOR281C	10.7825	6.27845	8.01676	7.29738
YDR280W	36.2382	29.7757	30.3769	30.5305
YJL168C	6.37073	3.75652	5.02583	2.82992
YKR068C	68.8295	69.7514	73.4476	83.7755
YDR337W	29.544	36.415	45.9785	37.568
YDR345C	6.82957	11.1349	10.4542	10.9298
YPL262W	326.81	420.909	474.915	448.057
YLR181C	23.3276	17.2486	23.6841	20.1871
YCR015C	4.44398	2.25013	4.64769	6.53826
YGR141W	17.7362	12.7223	16.3009	14.9803
YIL022W	17.7487	13.5084	16.6556	16.2892
YIR017C	53.1231	53.4834	62.2056	65.7199
YOR111W	18.9225	19.2032	21.8717	27.7811
YKR075C	26.1902	32.5956	33.6635	30.3185
YPL090C	9.5522	11.4331	10.1541	12.3043
YLR150W	144.173	135.692	130.619	136.371
YBR281C	10.9258	11.2407	14.218	12.1812
YJR120W	35.022	60.8324	45.4315	52.0764
YPR047W	7.80509	8.7915	12.591	10.2632
YFL041W	1485.97	1980.37	1852.43	2023.56
YDR378C	116.016	140.113	118.393	154.02
YJR061W	19.4233	24.9622	25.8418	25.6825
YBR003W	15.4726	13.7357	14.5601	13.1928
YJL094C	86.1655	93.5927	95.0961	99.9635
YDL172C	6.99168	9.57912	7.64455	6.70085
YBR259W	2.66806	3.10713	5.55209	4.20681
YOL042W	20.2529	23.001	26.9023	23.4949
YCR018C-A	12.2527	14.2691	17.2245	15.8181
YKR044W	2.44437	5.8514	4.00893	2.21255
YDR397C	26.2957	16.3675	10.4099	14.7735
YER130C	1.22219	3.16292	3.26654	3.40392
YOR036W	51.5852	55.0888	53.8278	44.5318
YPL236C	28.2051	36.1508	41.2402	39.9511
YPR160W-A	49.353	38.3165	53.9615	61.854
YNL032W	13.8452	7.93385	9.37118	6.88578
YOR123C	78.2809	87.9988	91.1081	85.7848
YER039C	16.0219	20.6992	21.6237	24.1589
YGR220C	53.2026	53.6431	56.4078	64.9467
YER139C	40.8891	57.3359	58.089	48.4573
YJL093C	3.34161	5.08891	6.93256	5.1545
YJL054W	8.78104	6.71999	7.6808	5.18819
YDR322W	18.531	28.5172	25.8695	26.7501
YDR315C	2.63718	3.58303	5.52659	5.50863
YGR109W-B	0.565234	1.0532	0.947623	1.65295
YHR059W	18.1554	18.1227	18.1492	18.8534
YPL135W	1169.71	1093.99	1182.35	1170.42
YLR036C	3.75512	5.83077	6.5008	4.70628
YJL167W	22.651	14.6995	12.2885	15.3861
YPL026C	73.1951	110.229	106.489	98.309
YIR035C	25.2366	30.8162	32.1473	33.7784
YKR076W	350.392	277.194	297.378	305.099
YLR179C	12.3383	12.1581	10.0313	11.895
YPR145C-A	126.868	163.657	154.72	129.649
YDR433W	245.276	237.592	242.898	271.606
YMR270C	8.48701	6.9767	6.18634	8.75967
YER170W	43.3237	52.4062	57.7598	62.0041
YLR297W	41.3519	51.8143	56.6596	48.546
YGL083W	10.1221	7.43145	8.09996	9.00889
YGR063C	48.5602	30.6994	33.3738	30.4302
YDR492W	103.331	65.925	93.6908	101.32
YGR021W	6.58647	5.93835	4.41383	2.92913
YNL051W	10.1962	5.4132	8.36123	9.2083
YMR212C	10.1121	5.8002	7.75594	8.79575
YLR114C	10.3703	13.0683	12.2695	16.5859
YOR257W	54.3347	54.3042	60.295	55.3927
YFR039C	97.4496	143.531	128.09	140.652
YDL025C	8.14339	9.26035	8.17055	7.68458
YFR014C	8.63004	9.10802	8.69872	5.577
YHL010C	111.088	132.686	128.691	120.612
YDR263C	211.401	229.223	242.324	234.749
YPL046C	403.05	502.066	476.885	477.178
YIL169C	10.2526	10.2473	9.67873	8.01443
YPL052W	13.2874	13.509	10.6078	11.102
YGR165W	51.3968	78.9837	80.1422	74.1553
YPL057C	23.6342	28.4471	28.2691	26.2411
YNL328C	13.6012	9.5037	9.91419	10.796
YOR299W	3.48481	5.34955	3.63702	4.06972
YOL101C	44.2156	36.8453	43.1876	54.1838
YER020W	34.5471	31.4997	30.8919	31.3825
YLR174W	134.203	159.871	195.433	172.971
YER059W	40.3481	53.1749	56.6753	56.3267
YLR084C	89.556	113.003	113.487	99.9827
YOR140W	3.46859	4.84727	5.05664	6.47245
YMR263W	20.2474	9.94755	13.8363	12.688
YBR050C	14.8008	21.02	22.6954	25.5624
YHR132W-A	307.942	489.134	465.98	431.689
YOL084W	134.705	175.016	156.416	147.593
YPR030W	14.891	16.6113	19.4235	15.9125
YHR191C	36.3654	58.231	48.0447	50.0077
YKR017C	8.98312	13.1083	12.4254	12.4793
YGL167C	15.7089	13.3964	12.6451	13.3319
YMR173W	112.127	56.1135	38.7671	41.3988
YMR157C	31.717	34.6634	35.2122	30.8833
YEL012W	108.213	136.803	150.586	141.062
YPL007C	11.8395	10.4882	9.2939	13.5702
YBR054W	91.017	113.492	108.314	103.986
YDR319C	20.7734	19.9847	22.7132	20.9414
YNL100W	23.2992	16.8414	21.3755	17.1177
YLR218C	37.7997	59.8878	52.3825	42.4164
YML087C	3.34073	6.40788	6.66078	3.69435
YPL061W	10.175	7.24906	6.80596	6.75122
YLR312W-A	10.3346	8.8832	11.2996	11.102
YLR427W	13.8861	15.8622	11.798	12.3043
YHR011W	4.58471	5.02511	4.71795	3.042
YPR151C	435.38	465.791	455.162	463.464
YDR540C	10.796	8.80082	12.1976	12.6285
YKL084W	29.0861	22.1209	19.4707	21.5745
YCR030C	41.1372	43.1792	43.4989	38.583
YOL023W	1.92805	0.918546	1.14987	2.19674
YML003W	10.6233	7.42294	8.59535	6.92339
YPL104W	2.16257	2.30858	1.47782	2.03276
YDL203C	17.4452	14.2101	17.0938	17.9213
YHR192W	32.6797	30.2907	38.405	28.9767
YOR037W	7.13509	4.05801	7.98278	7.27869
YOL003C	10.9062	8.2183	12.2754	7.83944
YGR044C	6.76189	6.4429	6.49715	6.67701
YEL020C	13.7294	10.5353	10.7059	8.40346
YPL110C	210.085	218.092	231.794	233.451
YPR026W	24.6351	26.5515	26.4073	25.6687
YLR385C	7.64317	5.34057	3.89987	6.38611
YNL215W	33.6672	48.5639	48.7327	42.9142
YFL051C	1.15075	1.62729	1.1234	1.59675
YLR371W	131.228	144.416	147.851	142.549
YLR328W	4.37115	4.91494	4.1201	5.10053
YIL077C	117.644	173.761	144.525	149.6
YBR201W	62.6766	67.0538	73.1197	68.4045
YOL103W	133.602	141.381	152.479	172.58
YBR004C	5.8413	4.69701	4.71403	5.0549
YLR152C	18.9172	32.2629	29.3866	28.1138
YDR287W	19.1928	25.7899	23.2911	23.79
YDR410C	19.3673	26.5167	21.1758	26.8971
YIL068C	35.309	35.0625	36.9241	32.5927
YGL198W	33.854	31.9748	27.6886	29.3997
YOR228C	7.73139	8.52982	10.233	7.3948
YNL274C	22.7879	18.0296	17.6883	17.4412
YMR238W	137.192	132.733	135.088	140.545
YDL161W	10.1921	9.71125	15.0513	11.4465
YKR004C	42.7818	31.8412	38.6875	37.2909
YGL115W	36.1054	33.4163	35.3213	30.0084
YOL129W	248.46	252.366	246.097	262.411
YLR092W	16.6016	25.1644	21.9695	26.4212
YOR232W	79.3427	92.0787	89.7637	90.1175
YDR316W	14.3946	26.5545	23.8171	25.3848
YMR158W	28.3659	37.4713	27.7743	23.3469
YLR178C	64.2001	64.3717	70.8245	47.9884
YMR041C	38.8109	41.3782	50.2047	46.5863
YOR305W	6.94027	2.99348	4.77784	5.79881
YDR282C	24.4891	35.4791	33.151	28.8652
YPL132W	14.1385	23.8626	22.404	19.2606
YDR093W	6.54219	6.90322	8.14109	8.78821
YML118W	57.934	50.4973	53.8875	52.1177
YDR237W	22.9892	28.4917	26.0583	24.8473
YDR332W	2.40627	1.60129	2.44303	2.69265
YDR027C	19.9209	16.9561	19.8272	19.6582
YIL070C	41.0276	39.3636	41.0355	40.61
YGR076C	47.5649	42.759	39.6891	50.2004
YMR013C	9.32772	6.9736	10.0728	10.9688
YKL170W	92.8998	131.854	120.62	107.335
YMR119W	25.1252	33.2498	30.5931	31.0122
YNL191W	24.7009	25.7899	25.8898	31.8115
YDL119C	10.796	6.51912	11.3669	13.0294
YHR195W	16.5872	18.4287	17.5107	18.1602
YNR030W	25.7588	13.6124	21.4189	16.9556
YMR283C	3.72978	3.12194	2.67623	2.04511
YBR066C	8.30735	6.00482	3.75851	1.7951
YGL154C	7.05508	5.3007	7.46503	9.41257
YER091C	33.4079	19.9907	23.2294	28.9424
YML111W	1.2781	0.893059	0.978215	0.480553
YGL252C	17.6075	20.505	23.8986	22.0674
YOR278W	87.4924	121.535	122.713	108.526
YEL005C	80.3472	136.657	118.49	113.046
YKR002W	234.719	323.544	327.16	306.529
YGL205W	488.193	596.678	539.566	510.388
YDR387C	2.57814	2.62711	4.69814	3.36581
YMR089C	26.0032	29.5336	37.1013	34.5595
YNL230C	14.2347	18.8123	21.5097	20.8471
YAR023C	41.7444	31.4315	40.1339	36.9835
YJL003W	179.715	212.676	208.579	246.375
YLR116W	59.3424	71.0155	65.5725	63.6361
YLR431C	44.0463	54.3847	60.3441	57.6972
YJL170C	6.66699	5.99955	4.6388	4.93747
YBR091C	119.635	166.89	137.102	153.146
YDR135C	5.77325	4.88561	5.55486	5.3061
YJR149W	30.0605	26.8215	33.5216	27.5532
YOR269W	6.42455	6.07014	5.96417	6.53265
YNL333W	2.27012	3.12437	1.35387	3.36243
YHR098C	20.0576	16.4319	21.723	20.6973
YNL125C	6.33892	8.20231	6.83458	7.06182
YGR205W	25.0711	19.2996	25.5537	16.7759
YJL150W	84.5907	76.1599	80.8313	68.5994
YDR016C	23.7991	22.3513	20.985	24.0543
YLR100W	50.2057	68.076	66.41	73.4831
YOR131C	31.2487	30.3259	34.7993	31.9113
YGR074W	27.2025	19.0074	11.897	17.0464
YGR199W	23.4983	17.6696	20.1627	18.8209
YHR082C	92.2397	101.643	103.782	97.3129
YOR158W	17.3313	16.5953	17.4758	14.2395
YOL001W	9.03605	14.6833	12.637	12.9051
YGR006W	7.4455	10.4049	10.3116	11.8198
YOR201C	1.55371	1.49009	1.69879	1.0309
YOR244W	39.6021	47.221	43.4479	48.6169
YGL257C	1.81602	1.74166	1.752	1.6066
YGR065C	17.2535	16.121	14.1484	16.0921
YLL060C	35.7848	54.2071	50.0111	54.9653
YJR134C	10.0428	9.06397	11.7126	9.43993
YBR137W	90.6862	139.556	112.926	123.128
YDL089W	53.8638	79.311	80.9616	70.4559
YEL017W	97.6489	140.204	122.753	123.514
YLR360W	9.04806	13.2511	11.242	11.6835
YMR059W	12.6778	18.4552	13.8617	13.2409
YKL144C	8.6517	4.86401	5.54527	5.98243
YDR277C	15.0205	23.3231	21.1371	18.9994
YGL124C	8.93619	7.83189	10.6772	7.38949
YGR042W	14.3946	11.9739	11.7416	11.4544
YJR135C	4.44925	6.0958	5.43703	3.93616
YDR270W	436.545	543.579	515.081	507.852
YBR205W	62.9625	59.5647	58.7036	59.0425
YGR227W	15.9308	21.0703	21.5242	21.2496
YDR451C	2.75825	2.40912	2.63884	1.94451
YLR089C	13.2642	11.2342	14.7225	12.468
YIL144W	83.1976	84.6156	87.5001	90.4185
YOL025W	50.3925	58.8944	59.0266	56.8523
YBR254C	5.90549	5.58782	8.07117	10.1768
YNL122C	140.348	135.505	148.863	147.333
YER063W	131.939	153.314	155.964	150.853
YBR228W	7.27308	7.0583	7.73133	7.84931
YNL192W	33.2941	38.0494	37.5919	37.4443
YGR250C	28.2603	26.4872	29.0816	25.9484
YNL030W	595.664	546.01	532.121	563.559
YPL242C	39.9851	55.3331	52.5479	51.091
YHR042W	136.406	138.299	145.584	148.085
YER077C	7.48779	8.31909	9.12802	9.4923
YLR072W	128.996	175.594	162.992	165.632
YDR438W	208.333	167.157	194.784	211.144
YMR273C	13.3022	15.6409	19.1816	19.571
YKL100C	608.123	774.661	748.811	778.166
YNL217W	65.4557	89.3323	98.8416	92.8482
YIL138C	193.415	139.774	185.319	159.572
YCR092C	2.24781	0.805452	1.07131	1.66141
YPL172C	3.76925	8.6277	5.2581	5.53847
YBR039W	238.004	288.194	303.133	285.439
YHR106W	40.2872	34.2535	28.6514	28.1503
YNL275W	25.533	17.9372	18.6492	23.3202
YJL140W	74.9661	99.5849	104.406	103.6
YDR225W	1283.54	1077.02	1076.37	1215.91
YGR191W	18.1412	18.0265	19.0806	21.0064
YLR326W	16.9349	20.3285	13.9584	16.9795
YGL107C	7.07105	6.73747	9.03662	6.79046
YNL272C	55.7889	78.2899	78.0984	74.2109
YGL136C	12.8165	14.9256	16.1048	13.6654
YLL024C	23.1243	17.0879	23.1512	26.7702
YBR271W	1.00762	0.335269	1.41649	1.26285
YMR112C	64.2618	81.4225	88.2496	74.096
YKL017C	2.68815	2.72659	3.12879	3.26038
YHR116W	98.5814	121.408	125.433	125.192
YHR073W	6.48274	5.62786	7.86133	7.53391
YPR065W	48.5305	45.9798	60.9765	52.7821
YMR180C	27.5459	35.4205	31.7913	30.4475
YGL047W	73.625	90.5044	104.237	99.372
YGR017W	49.0867	43.6574	52.5381	46.4647
YNL185C	16.9836	19.7785	18.5695	30.6303
YDL121C	3.54329	5.15799	4.35843	6.6612
YOR385W	1.69974	2.72174	2.55537	1.06514
YMR198W	38.5526	43.0311	43.6854	39.2818
YBL089W	17.6661	16.4587	19.3158	19.1888
YIL155C	629.343	778.357	701.7	659.089
YEL042W	80.7715	111.264	136.634	141.289
YDL106C	118.255	144.558	153.008	146.468
YBR270C	14.7778	16.0623	14.7214	17.835
YGR247W	124.056	131.974	146.8	139.078
YNL202W	358.337	623.871	520.706	506.463
YML081C-A	380.018	539.783	605.943	575.5
YDR450W	48.0577	46.9905	54.528	48.2981
YKL122C	19.4522	12.2328	17.0149	17.5532
YPL070W	25.6336	22.5021	24.7362	30.9096
YEL034W	858.254	721.072	728.546	852.883
YOL122C	19.7797	14.8339	17.4372	18.1705
YDR384C	153.618	255.119	227.72	220.999
YDR174W	49.4617	56.4198	54.6351	61.0366
YMR218C	4.67859	3.96255	5.23173	4.86417
YML051W	10.3807	15.3128	14.3768	14.2244
YGL157W	28.7893	31.2782	32.0534	26.1811
YFR042W	49.3076	43.7147	49.738	41.8625
YER157W	8.02565	4.54457	6.35992	5.16768
YFL017W-A	90.3387	97.1125	86.8346	110.733
YJR121W	315.044	347.944	391.55	345.414
YBR251W	15.3943	15.1337	17.0503	15.7857
YAL009W	6.23768	7.82295	14.1649	8.11834
YNR020C	17.4341	30.7219	26.3358	30.4752
YER144C	35.016	42.5698	42.5307	44.5281
YKL166C	13.2172	10.6154	12.1259	12.3762
YMR066W	5.10936	4.42449	6.58916	4.35113
YOL153C	128.066	103.564	109.219	103.879
YDR233C	226.142	176.138	202.779	230.869
YPR098C	95.6939	88.3033	96.206	94.5234
YNL315C	127.482	167.298	163.178	162.91
YDR494W	36.197	45.6829	45.6517	47.0537
YGR057C	10.0698	9.62208	12.4216	11.326
YMR137C	5.2018	5.11782	4.41274	5.50777
YJL066C	99.5886	140.727	118.345	121.407
YML016C	6.8444	6.27696	6.36099	5.68297
YDR456W	24.1005	19.7667	23.1724	24.6812
YIR004W	148.617	203.435	194.963	184.688
YPL078C	230.57	238.712	267.769	234.129
YOR303W	42.5964	70.646	53.8009	51.1768
YPL146C	11.5157	7.16257	5.72319	3.77216
YDL135C	69.2201	58.9927	61.9231	57.5727
YHR105W	10.3346	5.50185	5.16555	9.9918
YIR019C	226.316	256.403	302.424	260.859
YMR006C	10.0574	7.12508	6.23136	5.98732
YHR039C	11.5157	12.5525	11.2816	12.2388
YBR085C-A	2927.78	2604.94	2665.1	2558.51
YBR132C	25.2467	33.2364	30.1137	28.7652
YLR019W	24.5242	20.9322	24.1494	18.1362
YBR112C	94.9791	118.561	119.448	116.802
YLR131C	14.2605	21.3394	23.7234	22.1966
YDL057W	15.4661	13.4542	15.4841	12.8446
YPR115W	22.566	20.4817	25.2649	22.8561
YGR147C	10.9164	18.1968	17.0845	20.3881
YNL103W	162.684	224.985	204.098	206.654
YDR259C	31.0038	24.6847	28.7103	30.5305
YMR203W	281.947	334.54	336.673	342.774
YOL065C	10.5692	6.79724	9.65887	7.71057
YJL145W	20.3095	14.3861	15.5671	16.0071
YER046W	502.884	733.807	668.644	748.982
YML025C	173.167	287.804	248.755	245.679
YLR191W	53.6563	57.7357	60.8966	57.0226
YHR181W	96.9744	83.0954	87.354	84.2477
YMR018W	43.6201	28.1762	33.1945	38.0496
YLR253W	9.42194	14.8738	13.5067	9.70921
YKL060C	189.67	314.364	305.703	268.064
YIL095W	16.3054	15.4283	14.724	16.8776
YJL127C	12.1462	11.9855	12.8749	13.9445
YCR014C	30.7359	33.7656	34.166	30.8169
YKL019W	14.1523	13.3205	11.8703	10.4478
YMR202W	67.7895	53.511	62.9551	70.3856
YDR160W	18.8703	24.954	26.225	31.2735
YJL130C	12.8535	15.8546	14.5127	14.4984
YLR300W	50.4651	34.6992	28.7627	35.8292
YER030W	67.0317	44.0354	54.4985	52.7759
YHR190W	107.977	81.0957	74.8055	83.5393
YDL107W	28.7893	35.9506	41.5276	33.2558
YBR138C	79.4698	84.5808	83.3999	76.0212
YNL042W	1.98547	1.24503	2.67183	2.87121
YBR272C	35.7514	39.4434	41.4214	39.4617
YGL231C	208.428	231.355	235.99	224.929
YKL162C	18.0403	19.2583	22.3548	19.7836
YIL096C	5.81234	4.23053	2.78035	4.09758
YPL075W	12.4779	21.4467	18.9852	18.0879
YOR216C	12.011	14.5644	14.0803	15.3637
YCL051W	7.24836	6.18227	7.36709	6.90923
YDR268W	14.0748	13.9696	18.8865	14.4326
YML112W	11.6404	17.6712	18.4093	17.9756
YAL034W-A	56.5123	69.5373	72.2818	64.4122
YLL048C	46.6028	62.8477	60.6163	65.9663
YOL155C	32.6898	35.3655	33.5591	28.6324
YPR093C	32.7491	45.8658	51.2534	51.2384
YJL181W	4.86305	3.7378	5.74253	5.24157
YNL131W	154.12	126.545	121.65	129.676
YOL032W	42.6132	44.3087	46.8697	43.87
YGR249W	10.3007	6.7669	9.24112	6.45495
YNL117W	688.252	803.268	916.556	1001.11
YER076C	7.32448	8.05594	11.7902	8.66976
YKL178C	20.81	21.261	25.4054	20.4809
YDL052C	18.044	17.4718	15.7388	17.0244
YJR034W	59.5194	91.1631	87.7127	101.353
YDR440W	6.13626	4.52584	4.02555	5.12704
YJR102C	13.844	9.89319	11.3526	9.464
YLR205C	387.644	293.557	283.193	261.138
YHR009C	183.474	219.255	207.352	228.946
YDR434W	50.8704	50.2578	60.2658	49.183
YIL004C	16.3841	11.4482	10.2366	11.7338
YHL031C	32.1762	40.4295	47.8335	39.2652
YOR346W	2.98026	3.4707	4.10577	3.73515
YGL127C	31.4549	24.8348	27.98	36.7497
YJR137C	31.6419	32.3253	34.3311	39.1496
YNL151C	8.19005	7.22563	6.5126	5.59886
YLL022C	138.126	157.558	154.98	162.663
YNL020C	4.46489	3.89974	4.67841	4.6632
YBL099W	282.419	324.306	355.828	327.752
YKL176C	11.2453	17.7374	17.1201	22.9245
YDR469W	31.742	38.2551	35.1096	43.4828
YFR047C	129.969	143.583	144.842	154.523
YDL092W	47.6043	58.6061	57.5023	40.9113
YGL021W	16.007	31.4004	27.6969	26.3916
YHR178W	2.54491	1.94493	2.52168	2.1928
YJL164C	24.3719	38.3165	36.9736	36.0815
YPL173W	20.0904	24.1201	24.9103	25.4388
YDR512C	21.592	13.9696	20.2356	14.6044
YLR021W	30.9485	37.7178	32.2645	38.7876
YJL060W	25.8765	22.0883	20.4419	22.2432
YHR180W-A	26.6827	45.7929	27.6388	31.6813
YML110C	49.9814	55.1797	57.7089	53.12
YLR077W	3.67523	4.39892	5.13464	4.35025
YCR046C	127.824	184.175	169.139	169.824
YGR252W	9.45933	7.18434	6.4454	7.04449
YJL185C	11.3476	11.0125	11.9477	10.7981
YMR015C	22.8539	21.9637	22.198	27.8085
YHR024C	14.5501	18.5376	14.9569	16.2094
YMR025W	32.753	25.9955	30.109	30.8523
YBL018C	12.6269	8.23468	9.94028	6.33009
YKL038W	20.0099	16.8363	21.9878	21.2539
YOR115C	110.532	153.497	152.963	155.629
YMR071C	1033.69	1330.2	1228.48	1267.24
YDR517W	62.1457	68.9534	76.8659	65.4169
YDR513W	111.442	108.692	124.387	130.941
YHR109W	7.93485	6.16042	6.22877	6.11983
YIL046W	11.5899	9.28604	11.4556	11.1556
YML038C	27.7684	27.5824	27.98	30.0253
YOL033W	5.79127	6.2255	6.0885	5.30405
YBL098W	97.531	87.2764	100.5	99.8173
YDR224C	935.651	810.633	830.783	944.562
YDR298C	165.277	170.588	216.592	193.681
YDR100W	187.595	162.227	165.003	146.072
YHR108W	28.5858	34.0008	35.593	38.249
YJR008W	69.6718	73.3599	82.6903	73.2941
YNL190W	80.1493	105.14	79.0716	76.7815
YLR127C	183.851	226.648	227.514	227.218
YJR045C	304.758	314.678	346.005	332.064
YMR281W	148.088	171.517	163.241	185.092
YOR215C	601.106	775.967	747.876	697.721
YMR126C	11.7653	13.909	15.9824	16.0859
YDL022W	480.905	554.276	533.426	587.391
YEL050C	17.3967	25.9968	30.1309	27.0129
YNL284C	68.7902	83.8726	77.0836	79.3079
YJL065C	15.5618	26.7309	28.0746	30.718
YGR032W	1130.42	1224.59	1307.86	1263.74
YHR029C	20.9377	25.1147	26.0978	23.8794
YOR136W	849.037	1110.03	1188.23	1188.63
YMR195W	5.91929	4.3867	1.7651	2.69768
YBR284W	12.5814	17.927	16.4266	15.6755
YBR021W	1.9693	1.74733	2.25572	3.17329
YHR171W	88.8651	75.5042	84.2836	79.3675
YOR219C	3.47239	3.16153	3.52052	2.69029
YOR070C	15.4661	12.8032	15.7897	13.5452
YDR069C	6.28476	4.2879	5.06695	5.72849
YGR153W	218.101	241.123	231.153	226.694
YDL142C	10.6869	7.61976	8.10786	9.56707
YAR028W	227.636	323.106	270.561	276.569
YNL280C	20.2006	12.4826	12.9216	15.5004
YLR080W	22.8959	28.5571	28.1446	28.186
YAL040C	1.02636	2.15146	2.58105	1.92949
YGR024C	12.1496	12.611	12.7065	12.5789
YAL016W	76.1794	53.2294	72.6641	69.3515
YMR100W	19.7357	15.843	17.5981	14.7688
YER048W-A	76.0037	59.9014	78.0643	48.1087
YNL005C	27.6442	34.2889	35.2334	33.4164
YBR263W	63.8132	53.8139	65.2274	62.8171
YIL064W	8.46743	5.91652	7.671	7.88336
YML128C	107.814	94.0654	102.206	79.613
YKL004W	162.637	197.3	182.108	221.967
YDL137W	423.664	528.98	548.72	510.932
YCR021C	8.64598	6.85535	6.03404	5.53327
YLR030W	272.082	452.613	413.078	383.292
YBR048W	94.9836	96.4205	101.096	101.134
YKR085C	191.71	232.784	201.743	198.448
YDR116C	78.7917	91.5058	96.7994	91.6959
YPL196W	38.0834	27.4551	33.9561	31.8199
YDR251W	23.642	33.1549	32.836	34.9693
YPL231W	128.103	66.6949	93.0846	93.1784
YJR116W	20.5954	17.7951	22.7607	23.0367
YOR011W	18.5926	11.7527	14.514	13.8553
YBR083W	8.87721	12.4918	11.5934	7.57171
YDR072C	58.712	80.5174	73.7368	67.9014
YOR175C	374.836	437.526	439.322	437.548
YHR086W	51.7521	51.3547	50.5889	54.9813
YNL252C	15.8231	19.1948	16.0992	26.7168
YHL044W	8.53015	15.2113	16.0302	10.3567
YOR377W	2.16204	1.19266	0.87092	1.71138
YLR099W-A	170.195	216.939	174.052	155.999
YNL037C	588.112	694.528	763.769	809.242
YIL118W	75.5039	72.4308	65.9247	66.036
YLR023C	3.95578	3.45506	2.40287	3.44289
YOR217W	13.0612	11.388	10.8414	9.25606
YDL093W	39.6847	44.1777	40.173	46.2481
YOL068C	210.209	267.384	252.211	264.2
YEL016C	74.8278	109.069	112.496	118.597
YDR207C	50.531	62.2115	61.8763	59.6206
YIL040W	35.3213	31.5548	35.4453	40.0232
YIL016W	6.16913	2.39478	3.59743	4.1236
YPL081W	4.85212	3.39036	8.48833	8.1082
YIR033W	71.7363	45.4176	55.3015	58.3109
YJR112W	26.8911	14.3687	16.6035	18.6355
YKR065C	62.4307	62.1567	72.5045	57.5683
YDR014W	8.2517	8.32834	12.3304	9.07783
YOR220W	284.382	233.871	273.317	242.597
YDR470C	15.7032	11.9145	11.0562	9.98951
YOL048C	125.853	128.503	138.969	140.528
YDR032C	239.321	213.898	179.369	163.677
YOR285W	3589.54	4541.78	4362.26	4484.93
YPR011C	7.68964	8.51824	10.8685	11.0478
YHR058C	9.17919	8.9891	7.07105	9.41257
YBR211C	39.0779	54.0828	56.5564	51.5788
YOR246C	7.03532	4.95897	6.27527	6.96106
YLR459W	51.8975	32.9011	43.9846	43.2978
YDR009W	2.18362	1.60608	1.50791	1.72846
YMR132C	12.1859	14.5461	18.9865	11.4544
YIL157C	39.1405	59.5197	55.5278	45.8114
YMR024W	12.5711	10.4828	13.5752	12.2541
YPL210C	13.4443	7.88234	10.2391	9.41257
YOR212W	70.9755	94.7717	98.3284	99.3135
YMR274C	10.1151	13.592	15.3134	11.2145
YJR100C	21.3115	22.8593	26.1632	28.5841
YOR034C	4.89023	6.0624	6.46799	7.11745
YGL075C	96.6944	97.6654	105.21	103.146
YBR268W	802.082	1096.25	955.307	1053.92
YJR101W	26.8078	43.1642	37.4672	50.5433
YGR112W	7.15841	8.33642	9.69849	8.77658
YBL050W	490.578	589.73	582.277	574.396
YGR212W	9.87427	5.37626	6.87038	5.46446
YOR075W	33.6315	40.1913	41.7776	36.1919
YDR350C	2.52879	2.15207	3.19029	1.95035
YKL055C	10.4486	4.66011	7.53517	5.01519
YBR026C	128.395	144.138	148.232	131.133
YGL045W	18.4956	31.155	30.9359	21.8007
YBR056W	66.2989	46.1865	51.8531	45.9628
YLR147C	23.1719	18.8078	15.3549	18.4808
YPL120W	21.6187	19.3185	24.3395	22.6683
YMR264W	63.8371	59.0365	68.0873	63.5348
YKR095W	55.8723	61.5985	62.8534	64.0758
YGL227W	79.6534	97.6887	97.6843	91.9906
YCR010C	15681.2	10571.4	11736.1	12189.5
YKR050W	6.02258	3.00586	4.92063	3.64962
YER136W	153.543	111.601	135.383	129.459
YAL053W	36.4011	21.4151	31.6424	27.0139
YNL143C	5.33135	5.58782	7.57793	9.35447
YOR103C	187.779	227.137	235.373	252.246
YJL074C	52.5862	38.538	44.1881	46.9566
YLR081W	0.829961	1.08736	0.680596	0.780141
YDL095W	104.983	112.933	120.861	121.176
YBL107C	94.0124	104.18	105.992	118.641
YJL190C	7.26216	11.4777	6.23879	5.85106
YDR367W	65.2747	62.7385	70.1233	73.9492
YKL109W	45.7178	42.5679	45.1532	41.6221
YCR075C	20.0689	15.8592	16.4571	16.7682
YPL013C	43.4662	63.7669	62.9551	43.8638
YMR295C	91.2199	70.4442	71.0898	84.3253
YLR393W	11.2943	11.8634	8.47473	11.9347
YDR170W-A	12.8876	9.56183	12.9547	10.1601
YDR347W	38.8941	61.059	58.7859	57.3481
YKR003W	48.5861	53.7681	52.9762	52.314
YDR181C	36.1424	39.1873	45.2405	48.8897
YHR158C	14.8849	21.8437	19.4089	17.962
YDR372C	8.47782	6.78766	10.6213	8.633
YPL139C	22.0652	18.8541	17.4162	20.4544
YMR197C	307.958	373.876	383.772	342.228
YLR153C	55.2372	49.0786	54.422	54.9917
YOL075C	5.91591	4.52285	5.62893	6.22583
YKL135C	16.9397	12.3296	15.0487	16.6373
YOR187W	545.481	631.076	591.748	601.474
YPL021W	1502.53	1164.66	1210.76	1267.58
YOR320C	23.5438	22.3039	16.8058	18.1936
YJR088C	62.6404	46.9131	53.9615	47.0513
YOR113W	47.6712	40.8317	43.752	42.5722
YHR114W	14.9104	18.5654	23.0699	17.1593
YPL109C	26.6233	16.3956	20.6232	21.0381
YER026C	208.358	164.112	176.127	169.316
YGL080W	325.76	353.996	344.835	325.709
YIL124W	164.865	106.852	126.363	118.628
YGR214W	37.3148	32.8075	36.2059	43.6695
YIL017C	29.0446	36.4261	35.5955	34.8815
YCR047C	9.89631	7.07209	8.85306	11.8392
YPL037C	117.243	87.4615	93.0641	104.061
YDR409W	6.23876	4.16248	5.2581	4.72399
YKL190W	450.294	593.598	551.664	548.624
YGR178C	30.2226	36.4361	35.7313	37.4673
YLR167W	31.6033	32.2665	29.8208	45.0341
YBL031W	7.94187	3.9938	4.73643	3.39325
YDL178W	14.5355	14.1719	15.6464	17.37
YMR145C	522.783	609.186	596.852	555.695
YGR066C	92.5067	36.7317	28.4687	35.5509
YPR171W	10.8541	8.18611	11.3025	11.1419
YLL004W	16.203	18.5325	17.2942	15.3513
YIL149C	6.69437	4.28175	4.7406	4.65147
YJR077C	351.781	433.094	452.328	425.564
YOL044W	39.3875	25.0531	28.1914	29.1428
YOR386W	33.4293	30.9479	37.8192	34.099
YAR008W	13.495	9.42945	13.7714	10.1479
YJR067C	40.5882	68.7027	63.4711	62.1075
YCR038C	25.1386	28.4145	31.5281	28.0312
YOR327C	899.665	1114.77	1046.63	1070.42
YLR375W	18.3043	20.6956	23.1224	20.9362
YGR081C	71.4456	83.554	96.2455	94.4542
YPR063C	56.151	57.0789	73.3609	70.9702
YBR151W	51.1809	54.8622	65.0748	59.5284
YLR395C	280.085	277.307	278.496	225.051
YLR318W	5.46463	4.34608	4.44475	4.76075
YNL055C	1697.48	1630.63	2003.36	1766.63
YHR013C	48.6394	38.2727	41.6826	38.5528
YPL060W	48.6641	43.568	38.9874	45.6056
YOR226C	64.303	89.5683	100.177	85.8582
YGL061C	27.7791	50.5845	48.3208	49.6912
YNR043W	142.19	108.14	118.062	123.462
YDR441C	52.2472	61.2591	66.064	70.3812
YLR004C	6.16913	10.5104	10.7423	9.02038
YPL150W	17.2997	23.7958	25.1963	23.6453
YKR067W	107.045	121.605	116.258	105.653
YPL253C	47.6765	42.923	44.3092	45.1593
YOL118C	20.1178	29.0836	14.4114	14.7804
YHR120W	0.612538	0.998674	1.47342	1.38185
YER029C	90.4341	79.5554	78.9606	88.0633
YKL034W	22.3614	20.96	23.7679	20.0182
YGL037C	1417.25	1473.82	1443.49	1465.97
YBL090W	16.7634	23.7659	32.6729	26.947
YDL130W-A	167.579	138.111	155.039	151.865
YLR414C	33.7448	28.3055	30.7035	33.7155
YDR289C	72.4184	63.5975	75.1243	76.9987
YNR017W	64.3859	60.4476	69.7778	75.7178
YDR430C	10.744	6.84364	8.8267	7.58828
YLR256W	22.8884	23.0917	23.4615	25.897
YAL011W	6.55597	8.40939	7.89536	7.97842
YPL176C	18.9919	19.4842	21.9189	24.0858
YIL088C	13.5695	15.233	15.2375	15.6277
YCR028C	46.2497	36.3152	47.1206	46.5473
YGR183C	769.347	947.314	901.464	970.362
YIL005W	63.6572	51.1261	62.4013	62.111
YHL038C	5.18301	3.84106	4.63663	4.72426
YGR036C	19.629	14.9347	15.7388	13.4486
YPL228W	58.2304	67.5599	71.9826	61.9513
YGR243W	1457.15	1621.44	1562.97	1585.31
YLR295C	419.501	565.168	536.617	525.759
YMR240C	22.6448	22.1905	22.3438	21.1124
YDL234C	32.4721	24.1652	24.5066	23.5249
YFR041C	45.6873	41.3013	40.6015	45.4941
YPR154W	195.943	212.451	206.853	225.325
YNL200C	97.1479	76.5064	82.0912	83.6074
YDL116W	32.1691	25.6076	29.8302	27.3546
YIL026C	74.2259	58.6944	67.2968	68.59
YMR155W	10.6869	13.3346	14.1887	13.9406
YMR166C	3.46461	4.61115	3.24697	3.30833
YNL148C	16.906	14.5521	18.2168	15.6609
YDR213W	17.0031	13.5008	16.1261	16.386
YHR104W	83.9375	65.3122	68.2695	72.163
YDL124W	30.8527	25.1738	25.1391	25.6142
YIL014W	6.21961	5.26773	6.07914	6.61396
YMR164C	15.1605	9.14786	9.53345	10.1402
YCR071C	58.0319	71.2777	56.5109	57.9577
YJL055W	84.0749	87.526	81.6188	84.9352
YLR052W	14.9555	17.4166	12.264	13.1205
YDR036C	158.73	199.767	202.346	183.183
YMR293C	16.0444	20.0408	19.0987	21.8922
YKL195W	151.144	202.733	190.341	175.709
YKL039W	106.589	96.3234	106.299	112.54
YHL019C	9.62918	11.5571	12.1398	9.60532
YOR193W	4.03211	2.62956	4.05593	3.2342
YOL083W	215.37	216.859	239.646	229.526
YBR024W	42.2651	42.3248	49.5604	46.3174
YMR230W	28.7893	44.4427	38.7979	48.6681
YPL098C	77.1797	62.7738	66.9735	67.5569
YBR297W	31.6746	32.7056	36.1747	32.626
YBR002C	7.11645	5.02276	4.47995	4.0541
YDR079W	30.041	13.8481	23.266	21.1783
YNL177C	43.4817	55.7241	54.0546	46.7815
YDR244W	119.624	119.86	123.787	119.744
YCR028C-A	1999.86	2231.85	2183.35	2056.02
YNL294C	12.4343	13.3064	14.0853	16.005
YNL080C	176.552	214.109	219.889	225.016
YGL068W	73.7005	87.7448	97.1307	88.6574
YJL117W	153.608	182.791	199.214	185.35
YDL076C	184.461	177.754	193.902	189.198
YGL123W	30.3819	30.5309	20.0921	35.6209
YMR193W	99.7386	136.633	147.773	140.401
YEL041W	62.659	89.0295	82.9262	84.1397
YNR032W	34.9761	36.8892	39.6852	44.0422
YML113W	5.83395	3.5447	4.16003	4.13268
YBR176W	6.28844	10.7561	9.02428	7.635
YNR031C	10.9252	11.3046	12.9139	14.1088
YDR477W	39.9486	31.3428	43.1663	38.3146
YNL111C	119.718	68.3816	96.6143	102.886
YCL002C	11.4164	6.35855	13.2966	13.375
YNL257C	10.8019	14.1312	11.7586	10.8543
YPL047W	27.3498	30.1742	26.7559	27.0611
YLR354C	44.6416	46.6831	49.4078	37.2233
YMR029C	53.2373	48.6939	51.3384	50.6859
YMR239C	4.71329	1.78019	2.92491	4.15097
YNL004W	8.60369	9.71125	8.53874	10.1194
YKL183W	53.9673	70.0911	66.2454	69.6486
YML126C	623.117	404.312	472.163	508.81
YDL101C	17.9496	10.5874	10.5775	11.5402
YNL246W	23.9715	22.1688	17.4733	21.2071
YKR087C	34.4412	32.9099	31.6707	35.4174
YOR197W	32.7626	24.1913	26.0662	28.1313
YDR086C	394.555	381.437	397.34	379.743
YKL032C	257.211	340.606	313.36	270.174
YML079W	18.6656	17.6845	16.6035	16.2565
YPL015C	44.5229	29.0437	33.8567	34.1935
YCR020C	13.8071	13.3423	11.8844	22.4589
YMR282C	5.13178	5.49818	4.93766	4.11625
YPL140C	9.45849	15.6964	16.1589	13.6324
YDR079C-A	30.4189	32.8943	33.2593	35.4007
YDL049C	262.456	294.067	288.228	277.929
YPR166C	56.379	53.0843	65.5782	51.8672
YBR252W	26.9899	20.9543	22.1327	25.9336
YPR131C	18.6476	15.6205	16.8119	13.5306
YJL159W	195.679	354.5	270.355	285.355
YPR134W	24.2801	36.6238	36.1549	29.5608
YLR238W	71.2519	79.7634	84.2145	86.6271
YJR106W	52.7667	71.4228	70.0888	70.6298
YPL088W	105.531	97.363	107.199	96.0684
YML129C	284.506	299.77	333.292	324.026
YEL051W	100.094	103.834	109.441	110.833
YNL124W	17.5292	20.5556	18.5006	15.409
YHR201C	20.4114	19.513	22.8171	16.9908
YOR045W	312.569	445.429	347.752	362.533
YBR177C	67.9747	41.5982	47.6535	43.4314
YGR275W	57.9958	51.991	59.7617	52.292
YGR105W	188.619	191.913	141.106	161.745
YKL027W	9.68611	9.71341	7.94293	9.7791
YPL260W	105.2	111.672	117.153	112.721
YLL023C	93.8973	70.1486	81.5995	71.8855
YMR034C	9.71204	11.1487	11.2257	13.9109
YGR269W	28.4658	36.9173	41.0269	36.4869
YKL049C	230.588	222.555	208.651	220.269
YDR175C	121.683	153.777	164.103	143.604
YDR129C	52.7726	32.6121	40.4206	37.6452
YKL194C	5.06899	4.69226	6.5371	5.37557
YCL045C	72.4977	41.1734	54.2043	48.0113
YNR036C	76.9146	112.09	118.863	113.63
YDR028C	48.8896	55.5184	57.3183	56.6995
YHR005C	11.8208	12.8779	11.9517	10.9917
YLR404W	27.9234	15.377	26.2707	20.618
YPL160W	11.6125	11.2696	11.2861	10.9154
YGR100W	14.7812	15.7011	15.4852	15.0372
YMR102C	8.97236	7.65154	7.57006	7.17203
YPL179W	145.576	249.238	213.929	196.61
YBR029C	14.7233	8.11382	10.9237	11.2034
YGR171C	1.65694	2.77381	2.60426	3.37453
YLR408C	155.406	250.638	215.148	212.986
YLR446W	48.5384	41.9491	47.5965	47.9344
YIL013C	71.7664	37.0916	50.3822	55.4183
YJL177W	19.8908	19.5066	19.8404	27.9905
YER001W	4.18471	3.97089	5.08386	4.95332
YDR162C	42.1889	43.2605	54.2516	52.8752
YPL151C	5.7312	5.58782	6.70355	5.6795
YOR352W	127.952	175.913	168.658	151.231
YDL205C	16.451	8.05517	12.8772	11.7148
YJL004C	62.8983	101.31	97.512	101.969
YOR161C	273.387	359.125	341.531	341.109
YMR139W	122.867	143.468	152.993	153.783
YBR294W	1.37092	2.1553	1.57388	0.687267
YNL291C	16.762	16.9853	23.6825	20.8713
YGR092W	19.6787	33.8301	30.6237	36.1468
YBR053C	55.3705	40.7466	49.3984	48.1087
YKL046C	68.1569	77.1899	75.1069	90.7911
YNL295W	5.13076	5.04564	5.73452	4.7156
YPR156C	21.962	30.2465	32.6782	33.2692
YDR103W	7.88659	8.5124	8.76324	9.16101
YPL203W	189.961	231.809	241.531	239.277
YCL041C	637.448	823.669	822.881	922.254
YLR370C	168.028	174.171	179.363	161.573
YKL033W	3.3903	2.50054	2.59481	2.62025
YBR085W	6.99739	3.72521	4.37188	5.01132
YHR083W	12.4444	7.5706	9.74789	6.51795
YOR251C	429.112	487.964	487.295	448.93
YIR010W	43.0269	53.765	55.286	51.3013
YML001W	197.412	199.033	202.522	206.944
YBR220C	8.83368	4.83383	5.93477	5.73569
YNL006W	27.9783	28.5687	29.7042	30.2373
YPL138C	31.5475	29.311	30.7236	29.1677
YGL226C-A	178.751	209.168	225.511	214.335
YHR154W	16.6081	19.9176	18.3394	17.162
YMR311C	307.634	396.576	370.836	328.514
YOR125C	23.6772	17.8601	21.7695	23.6047
YER057C	82.1803	66.4443	77.8354	76.7552
YLR059C	29.4802	24.6758	26.4411	31.1744
YOR258W	9.01482	6.43446	11.1284	6.19581
YER075C	40.7927	56.9478	48.5495	47.2354
YGL101W	19.6825	16.0792	16.7024	23.5634
YGR014W	1.7111	2.44104	2.10474	1.93007
YDR497C	25.2734	17.6832	25.6277	24.1395
YGR154C	3.07541	2.1887	1.68129	1.71307
YHR112C	13.7932	14.9424	11.3986	14.2718
YGR149W	30.9502	34.2575	37.0414	34.0721
YMR056C	361.554	416.659	442.205	399.634
YGR104C	77.3712	86.3784	96.6186	80.6823
YDR518W	47.5196	37.9703	37.0399	39.4143
YDL045C	40.1244	58.1756	55.2777	45.0076
YOR014W	74.8989	82.3181	86.7552	84.8747
YNL040W	32.2809	34.5243	32.7021	29.7239
YNL085W	40.3973	35.3872	39.6672	41.8207
YBL085W	4.37381	4.11673	3.2755	3.22894
YLR359W	26.2399	15.7859	19.58	15.4301
YLR039C	5.88556	4.33231	5.52451	4.38406
YHL034C	435.713	328.686	391.466	365.014
YPL152W-A	22.1456	30.9479	24.2135	38.857
YMR304W	44.1705	31.672	40.0293	32.4763
YOR168W	22.3755	13.6654	15.4599	15.6201
YBL037W	11.447	9.19824	12.0779	11.1186
YGR026W	76.0303	51.0023	64.4135	58.5106
YLR330W	45.5272	43.0392	45.4838	41.6196
YPR042C	4.92592	6.43768	6.76229	5.55628
YOL082W	32.2789	29.4631	30.3647	23.8721
YPL235W	28.025	18.8404	27.8562	29.5357
YGL161C	49.4661	41.707	48.0276	37.4454
YDL206W	2.78981	1.62445	2.11827	1.06836
YDL006W	109.663	141.53	143.932	144.326
YNL009W	4.73838	8.86248	7.22178	4.6789
YLR088W	57.4818	41.81	42.1111	53.0004
YGR130C	163.95	118.887	121.703	107.471
YNL127W	33.7211	33.5269	37.3417	35.5407
YNL079C	192.888	215.317	222.092	215.286
YOR292C	22.2372	19.1913	24.3137	22.3954
YJR135W-A	71.9732	107.483	92.581	104
YIL025C	3.32184	1.2895	3.02669	3.46938
YPL224C	18.077	22.2993	22.5467	21.3133
YJL201W	10.0266	7.63027	7.48949	7.58956
YDR105C	73.0512	98.9561	89.0246	94.5749
YCL047C	7.95017	10.3807	10.273	10.8697
YGR037C	8304.86	10492	9538.63	9236.87
YLR262C	117.213	146.082	145.503	139.54
YHR138C	170.917	122.814	165.671	158.759
YMR177W	6.567	6.69173	6.41091	8.37738
YOL018C	15.8417	21.6417	14.8228	21.5725
YPL161C	38.4482	26.756	28.8117	29.3823
YOR016C	69.2168	55.9971	64.6294	72.5469
YER154W	17.8899	21.7093	18.2455	18.0879
YJL083W	11.5157	11.1183	10.4387	9.62174
YBL052C	5.74367	5.69793	6.20247	7.2874
YJL197W	3.07707	2.38896	1.52927	2.3957
YPL239W	14.7145	13.0382	15.7388	13.6308
YBR192W	45.1943	68.365	64.5378	69.1394
YBR043C	7.39068	13.8111	12.9669	14.2172
YDR166C	55.1593	48.9521	57.0696	54.5013
YLR207W	15.6133	14.2335	16.3761	14.4326
YDL111C	16.8523	10.6305	13.8194	12.3205
YPL050C	89.5836	81.3206	86.061	92.5069
YPR072W	61.8357	66.0623	70.1699	69.762
YER100W	679.227	963.137	894.726	869.08
YGR126W	9.55094	12.076	9.24933	10.9442
YML077W	58.8124	76.154	66.5525	72.6785
YDL127W	2.78927	0.928081	1.52486	4.74428
YLR202C	15.5268	10.5478	16.2693	12.9731
YPR097W	34.6345	29.9007	32.8513	33.2744
YOL053W	15.3134	12.6618	16.7434	15.7377
YLR209C	422.966	603.025	587.94	634.639
YNL026W	364.664	458.85	465.055	449.273
YKR095W-A	103.474	108.841	87.5897	81.5756
YEL045C	16.9904	21.9849	25.2852	24.843
YGL114W	8.48182	6.26849	7.13372	9.19925
YIL011W	33.9175	30.5113	28.6462	29.7816
YKL065C	239.551	238.095	215.798	248.133
YNL180C	13.6564	18.6977	18.9672	21.5101
YLR008C	59.1243	67.9539	71.828	69.7414
YOR184W	349.453	333.129	340.895	349.684
YOR223W	39.8621	37.334	41.0477	40.443
YCR011C	33.0937	26.9517	32.0888	29.776
YOR372C	119.694	150.588	149.415	146.898
YBR212W	79.7445	91.4277	96.4604	81.9028
YER152C	24.4437	18.5031	19.7477	15.8282
YBR047W	13.6564	20.2021	17.7566	15.7278
YPR155C	27.3908	16.96	27.9449	21.9994
YMR008C	24.6264	23.8822	22.0391	24.8232
YHR007C	95.6638	85.4248	83.5295	104.785
YJL155C	236.963	302.129	290.059	282.152
YAR042W	100.023	128.137	128.605	127.336
YGR232W	53.9971	60.958	61.7502	50.0653
YDL138W	1.00608	2.43341	1.60772	2.61882
YNL258C	36.8973	34.6673	33.6617	39.076
YOR298C-A	747.212	618.216	685.352	637.987
YGL038C	27.6027	14.5453	20.6209	15.184
YGL022W	109.309	98.6142	97.63	109.329
YDR480W	63.2606	79.1853	80.3506	61.2436
YPL108W	7.34223	3.15018	8.87287	4.35884
YML002W	6.33524	5.41661	6.40073	5.92983
YML023C	1.39389	0.99894	1.28958	1.61258
YJL049W	8.83764	10.292	9.37006	9.06233
YDR071C	151.646	132.938	151.531	134.257
YLL054C	4.14565	3.75502	5.28823	5.48439
YLL001W	150.188	144.92	151.161	142.077
YMR090W	61.7308	42.8758	38.4389	43.0203
YLR148W	12.8095	9.32339	10.2941	10.3549
YIL065C	700.257	725.266	698.987	674.406
YOR238W	10.1371	5.90263	8.64524	6.60647
YFL014W	5291.47	3509.9	3644.4	3573.67
YKR014C	88.3764	72.9795	83.1593	89.2808
YPL214C	79.129	99.4868	85.9138	75.0717
YJR068W	30.1684	32.9246	29.5927	31.5443
YER093C	5.14167	5.1324	5.57717	5.42118
YOL130W	35.6439	65.5372	63.4048	65.0326
YLR027C	634.951	746.499	730.216	717.832
YOL081W	23.6977	26.085	27.1866	28.9454
YMR019W	11.8744	13.1083	14.0652	12.7119
YDR152W	7.72395	6.54184	7.16562	7.62699
YER163C	10.0019	8.18498	10.0492	10.1638
YHR038W	13.0984	11.1227	11.0395	8.20812
YLR099C	387.081	489.94	468.218	458.187
YPL149W	17.1689	26.3339	22.6638	29.39
YDL029W	75.2236	64.3501	60.7551	64.2096
YML062C	119.325	173.837	172.156	153.032
YGL092W	15.4393	15.1627	14.5725	15.6565
YNL164C	4.33573	7.47287	5.68871	6.52075
YJL019W	58.8812	42.2753	49.0917	48.6529
YAR014C	12.0998	7.28846	7.02543	8.05297
YMR291W	34.4253	21.9965	16.6548	15.7817
YKL105C	12.7322	9.78494	10.0886	9.88446
YNL098C	52.0677	46.9156	54.6442	50.9666
YGL160W	29.0505	31.7623	33.1343	35.6231
YIR003W	62.813	80.9726	72.1122	73.4751
YKL134C	42.7442	31.4343	35.9505	29.2294
YFR007W	13.7913	14.0532	16.21	13.6116
YHR016C	69.7611	52.2691	51.3175	53.5196
YIL039W	68.6123	74.5863	84.4486	77.7262
YNL208W	313.313	302.812	314.106	268.692
YDR023W	93.7113	77.3465	81.5716	95.4572
YKR088C	36.2129	32.8943	39.5944	38.5777
YHR061C	53.2845	27.5034	30.3038	26.1744
YML055W	88.3595	98.683	96.6104	96.6712
YDR127W	22.4589	25.9412	26.9234	23.1805
YLR369W	57.6688	90.8065	75.9803	68.0911
YKR072C	28.9495	26.8713	33.1712	32.8014
YDR489W	7.95631	3.16982	7.32569	8.13474
YBR094W	146.143	144.157	146.752	148.062
YDL112W	3.77897	1.41963	1.91042	2.54633
YDL033C	6.79948	6.06517	6.32715	5.43942
YJL013C	91.0112	128.295	106.998	97.4783
YDL072C	97.6332	58.3077	66.7187	65.4958
YOL147C	71.1108	80.65	85.5841	80.8093
YBL067C	7.43459	6.81591	6.48576	6.344
YPL059W	642.155	760.114	749.214	744.216
YKL062W	27.1401	25.6802	27.0985	27.2826
YOR321W	14.1201	19.2757	19.2982	17.6967
YBR036C	92.1846	105.64	108.521	114.981
YER032W	6.32288	5.87505	5.36884	5.47967
YBR280C	116.741	93.8537	103.092	99.3701
YEL002C	112.635	119.261	121.928	109.737
YPR068C	6.94027	7.33401	10.2583	10.7922
YGL084C	113.028	111.178	125.677	124.718
YPL154C	2719.47	1567.6	1583.5	1652.83
YLR361C-A	25.5095	28.8586	30.2822	37.4517
YDL030W	48.0009	69.9407	63.8175	63.8311
YDR432W	260.488	232.567	249.589	286.094
YPL029W	6.01447	7.84474	7.62827	8.24146
YLR097C	7.79525	8.4591	7.94203	8.8816
YHR056C	11.5957	10.5548	9.18095	8.93686
YNL045W	24.1088	17.3805	21.9184	15.2738
YIL090W	79.7804	106.121	106.17	109.009
YCL024W	2.37554	2.8982	3.33947	2.26839
YGL060W	35.3617	43.8761	40.8905	37.5897
YLR192C	285.786	328.455	333.457	342.041
YDR303C	36.9673	45.0639	50.0151	43.6645
YDL084W	212.38	160.961	168.224	167.817
YNL249C	1.43121	1.41031	2.28709	2.20766
YKL096W	17839.4	21125.6	20222.3	20728.8
YLR146C	6.55699	5.01114	3.13655	2.05446
YDR216W	59.6097	51.5759	54.9409	55.5611
YDR448W	10.9607	7.59405	9.55704	9.56377
YKL067W	334.729	320.257	368.804	337.12
YDR231C	38.6953	40.3765	43.6624	42.2891
YDR331W	191.39	245.636	234.476	236.923
YBR108W	55.6237	71.7449	65.8697	61.398
YER054C	37.4424	31.3087	37.4874	30.8296
YGR086C	651.717	607.256	625.42	548.439
YMR048W	83.1473	110.468	108.411	116.439
YGL094C	5.88394	5.13916	5.22711	4.01637
YOR143C	3.26278	2.45864	3.56746	2.88652
YBR125C	17.2428	13.6259	14.308	13.8923
YCL052C	38.7241	23.6462	35.5213	37.9901
YMR222C	21.1686	14.4626	16.6646	18.3945
YGL197W	17.4932	13.8858	17.6257	15.3371
YPL008W	2.59856	2.22982	2.99074	2.82824
YAL014C	29.0332	40.6301	41.6144	34.8584
YJL192C	35.0827	27.7572	29.8671	30.5434
YPR148C	120.417	112.67	113.803	115.53
YDL035C	23.9605	29.5407	28.4701	32.7874
YFL034W	24.2321	24.3428	25.1224	22.8459
YIR024C	9.35286	11.5727	13.4219	14.6524
YGR015C	119.629	166.875	148.118	145.961
YDL048C	3.05619	2.56257	2.80692	3.52388
YNL169C	258.028	288.805	304.457	299.282
YEL013W	263.584	276.852	286.17	266.061
YLR453C	3.67523	1.42668	3.51611	2.11115
YER041W	7.39184	8.8801	11.0597	9.45921
YNL225C	569.126	776.25	752.661	715.595
YCR024C	10.834	22.3985	21.0294	16.3244
YOR326W	77.3515	89.7789	93.7242	99.9609
YNR049C	34.6677	49.5005	47.4635	46.0937
YGR082W	39.673	32.3003	29.1743	46.2019
YNL197C	97.5786	82.8251	80.2138	82.6165
YOR094W	37.2154	26.9851	35.3163	35.2015
YNL236W	7.41587	6.52985	6.724	7.93415
YPR071W	16.7937	16.4142	20.6571	25.5577
YML006C	6.86367	4.70709	8.33843	6.02155
YDR423C	59.7931	78.4014	80.066	73.6433
YNL092W	111.983	125.132	114.344	110.801
YHR110W	159.012	228.608	205.175	206.02
YIL050W	129.66	164.61	168.275	131.847
YAR002C-A	345.183	343.986	328.94	360.815
YDR055W	22.4895	31.7125	27.7002	35.4872
YNR055C	32.4958	38.6713	49.2982	50.145
YLR309C	16.202	8.87035	12.4216	11.8114
YJL173C	148.698	91.1412	106.351	111.397
YHR005C-A	68.4718	70.6784	85.0745	71.1878
YFL017C	1081.65	1523.08	1348.59	1364.4
YNL193W	38.3501	44.4123	47.5375	44.3153
YBL095W	318.861	445.334	406.073	424.353
YOR291W	5.19118	3.36884	3.46621	3.87386
YPR058W	36.7863	28.8704	31.259	33.5758
YLR043C	341.358	324.094	283.298	304.975
YBL079W	43.4848	52.992	56.4601	50.3146
YMR301C	6.52156	7.39491	8.16259	6.99046
YOR035C	34.3228	32.6561	35.8108	32.0516
YPL045W	10.7914	14.6331	14.5468	15.0996
YBL032W	172.736	226.724	219.299	211.306
YGR038W	196.561	358.722	339.585	318.157
YMR299C	29.084	32.0394	26.6431	34.2343
YPL022W	7.56351	6.20295	8.26977	8.54474
YOR374W	1404.69	1330.35	1451.24	1230.96
YDL117W	2.726	3.87147	4.36179	3.9998
YOR289W	288.885	365.617	351.68	323.8
YLR454W	4.03866	1.92757	3.04038	2.59997
YPL094C	48.095	33.3954	36.0449	37.355
YNL135C	658.214	694.537	647.444	643.39
YKR016W	58.1311	49.9365	58.605	56.5115
YFR049W	696.479	1108.97	1025.44	913.14
YGL208W	95.0918	141.389	130.998	116.08
YPL107W	69.6474	96.9206	88.2471	86.0284
YNR029C	7.72395	3.43447	4.91357	5.63224
YDL098C	23.6895	39.0828	29.1392	39.5866
YOR293W	18.077	13.2548	16.8368	19.2994
YBR074W	27.1949	24.8036	28.4844	25.7887
YMR055C	8.82737	5.60729	7.01939	6.03454
YLR313C	1.34529	1.35779	1.47091	2.13567
YBR011C	652.485	510.91	536.528	601.538
YGR075C	21.947	15.6359	11.5747	19.0925
YNL027W	42.1136	55.3525	51.778	49.3862
YBR118W	36.462	28.2573	32.2663	30.246
YJL103C	32.2017	33.9187	39.833	33.7323
YJR052W	109.99	145.161	144.359	136.132
YDR322C-A	246.308	345.514	345.379	320.725
YKL052C	51.2512	59.4397	60.4185	56.8317
YOR043W	34.8923	43.0753	40.8467	41.5671
YLR149C	122.931	136.183	144.682	125.245
YGL169W	11.6006	7.08431	7.73404	7.4468
YPL195W	18.5412	18.9484	20.4104	18.3372
YLR312C	594.168	915.223	836.522	854.722
YLR228C	23.5812	24.0922	19.7723	23.1176
YHL014C	7.01086	9.90173	8.97029	10.2823
YNL130C	133.939	98.9672	111.434	125.417
YJL034W	1019.39	998.02	1090.37	1196.73
YMR022W	245.695	253.978	286.748	250.099
YGR222W	24.3763	28.3878	32.6264	23.9666
YOL102C	48.5734	42.2662	40.2793	49.5907
YDL086W	49.8712	50.1584	54.2802	57.1054
YDL133W	10.6066	10.1062	8.28357	6.90555
YER019W	74.3935	80.1086	89.14	73.7595
YLR351C	63.7174	61.8769	70.593	76.1426
YNL121C	628.935	805.992	790.413	857.509
YKL016C	406.765	580.557	560.91	517.246
YMR267W	19.3907	22.3513	18.6053	22.0705
YDR182W	49.7713	46.8809	54.5522	54.428
YJL101C	18.1735	11.0908	10.5084	11.1694
YOR195W	57.5785	41.2189	48.1976	45.2594
YGL156W	234.265	225.803	249.04	234.53
YDL165W	193.491	305.251	273.782	281.939
YOR001W	8.95129	8.63999	8.20004	7.88336
YNL008C	24.183	19.8067	20.7268	23.0922
YGL020C	57.5785	56.1886	58.2918	63.1426
YBR049C	149.005	159.03	150.344	156.277
YDR252W	27.9034	18.053	17.918	17.7632
YDR407C	5.75785	4.64625	6.64251	5.39802
YKL184W	76.5138	69.754	77.7432	71.1944
YJL203W	16.1043	13.1025	13.99	16.8657
YKL098W	5.28087	5.15799	4.8427	4.697
YOR129C	9.02547	6.59798	10.0123	7.51354
YDR033W	8.03421	25.173	19.0329	13.1859
YJL208C	13.7446	10.8151	14.2157	15.5965
YPL201C	145.9	134.259	146.99	129.306
YNL015W	311.541	329.282	348.502	319.579
YDR137W	4.55979	3.85247	6.0609	5.60272
YPL243W	31.2711	14.7981	20.5147	20.0315
YOL013C	41.7769	39.7029	42.0095	46.5262
YGR109C	285.66	341.956	336.4	336.827
YOR062C	14.3368	11.3103	9.60761	13.0415
YMR156C	4.46957	4.59273	2.5872	3.29512
YDR247W	38.5594	45.8151	34.7535	38.3672
YDL078C	230.847	202.196	210.433	203.126
YMR292W	51.7723	62.546	71.9487	53.3643
YNR021W	18.6943	20.3774	20.44	17.0567
YDR169C	59.0938	69.4971	64.7393	73.0395
YLL026W	62.3066	53.8543	60.5474	61.367
YDL115C	209.972	233.082	221.097	240.039
YBR110W	24.3705	20.7399	21.5219	22.6558
YBL097W	27.4967	29.4672	31.4347	32.9888
YFL045C	106.092	83.8886	100.728	103.792
YKL003C	73.0014	60.4682	70.8245	70.2301
YMR027W	72.1328	88.4635	91.8502	90.5638
YNL329C	8.14415	4.44373	5.47977	3.92578
YNL222W	104.072	117.255	123.554	132.363
YIL014C-A	153.769	176.707	197.753	182.53
YBL105C	28.4841	18.1851	23.4135	24.0968
YGR077C	10.8086	8.94051	11.597	9.49513
YDR358W	75.5585	76.5261	84.4862	87.7223
YMR064W	16.8466	19.4846	18.2936	20.3908
YKL124W	38.8655	50.1706	43.2816	41.3649
YPR039W	26.2859	42.2731	34.2147	41.5722
YNL214W	31.3483	21.2337	29.3791	30.4688
YDL047W	54.2264	39.0382	41.3951	45.9669
YBL069W	19.0992	9.64921	11.9768	11.2645
YDR519W	63.5349	56.6489	51.0153	59.099
YGR198W	35.9325	35.7957	39.9978	38.7944
YER031C	53.3448	48.6469	55.8572	52.7073
YMR206W	184.878	256.584	249.893	247.416
YFL009W	42.0475	36.9678	43.4059	42.7281
YNL031C	930.607	863.103	849.625	843.752
YLR250W	186.662	174.34	179.788	165.471
YGR161W-C	3722.89	4844.41	4434.45	4385.14
YAL056W	9.09487	6.85336	11.0409	8.3813
YER141W	205.162	242.514	246.833	241.058
YDR206W	17.1071	14.496	16.8123	13.9321
YJR012C	24.5015	22.1135	30.1381	34.5461
YPL123C	52.7225	39.2629	45.6614	46.4278
YOR288C	28.1153	23.7716	20.8447	23.1694
YOL087C	11.6522	12.3472	13.0272	14.9983
YAL032C	16.4739	13.9696	14.6895	13.2299
YIL092W	9.28384	9.82874	10.0482	9.75494
YCL042W	61.0333	52.302	49.7345	57.0088
YPR081C	5.19072	4.02995	4.62442	5.78268
YDR294C	54.3461	29.4096	44.6208	43.551
YMR039C	48.2985	43.2289	50.2718	45.7297
YGR033C	47.8949	49.9856	54.0842	57.0744
YAL005C	1115.99	1014.53	1101.36	1047.81
YEL020W-A	235.395	283.007	271.262	251.509
YNL282W	3.59866	4.57185	3.93469	5.74024
YKL207W	124.507	128.377	113.803	123.047
YBR221C	346.467	293.723	339.45	315.687
YLR433C	18.4381	19.5888	16.7409	17.0272
YGR157W	57.8495	51.1976	54.2895	57.1361
YKL064W	33.3349	45.8789	49.3038	55.6035
YKR070W	22.1323	18.1227	20.2288	19.5035
YFR022W	3.38697	4.78956	5.73121	6.46839
YIL035C	12.2334	7.21826	9.27384	11.8568
YPR045C	19.661	20.5176	19.8218	24.481
YGL245W	56.4922	40.7773	45.8686	46.1885
YIL008W	102.922	69.5684	78.6939	97.4201
YHR078W	11.5589	11.8256	18.544	15.9761
YNL077W	62.4427	63.3652	68.2735	54.8666
YBR258C	10.2986	16.3546	16.8904	12.3205
YCR003W	86.7189	128.792	114.394	113.525
YLR028C	64.2222	45.8358	57.5621	56.3931
YKL179C	17.7098	18.2874	16.3111	16.6194
YER022W	18.4458	12.5475	14.7963	12.6393
YJL031C	47.6705	38.7519	40.8799	44.5161
YLR420W	14.0191	12.439	11.6786	12.1318
YDR111C	68.0795	55.0996	73.7916	52.7914
YKR022C	2.28034	4.426	3.53213	4.04875
YBL003C	189.041	115.712	132.039	143.049
YHR001W-A	312.711	276.308	328.886	273.722
YDR258C	66.3753	80.5154	86.6428	80.3634
YOR270C	131.638	137.946	153.285	143.623
YNL138W	53.8308	44.5703	51.0346	43.2693
YKR026C	16.1059	7.97144	12.1068	17.1576
YJL186W	33.5113	33.4678	32.5324	32.1997
YOR033C	170.628	219.913	213.107	220.081
YBR255W	5.6299	5.26497	5.03641	6.30758
YDR377W	405.156	428.49	498.267	443.539
YBR059C	11.8435	8.80505	9.19179	8.68077
YOR180C	528.489	626.634	605.069	595.918
YOL138C	4.8455	4.32114	5.53661	4.86923
YBL057C	153.247	188.782	185.96	195.395
YMR266W	29.714	26.8503	27.6355	27.3509
YML116W	3.85325	4.23093	4.09268	3.86341
YGR167W	130.085	140.937	143.106	139.649
YKL002W	47.847	50.9987	53.2015	48.1087
YOL094C	34.4714	31.1006	36.2406	37.031
YPR022C	60.7485	95.0736	87.2735	90.6597
YDR041W	114.218	138.845	137.885	131.776
YMR009W	59.018	59.5103	50.3641	55.0243
YLR200W	29.0923	28.939	39.0984	37.2209
YGR101W	49.4788	38.3458	45.4355	43.2537
YDL015C	56.7871	43.0896	55.1668	48.3567
YGL172W	76.3901	84.0763	81.5776	82.0396
YOR142W	1170.33	1608.86	1599.47	1489.12
YGL212W	201.234	217.869	222.357	215.031
YJR010C-A	128.208	106.392	125.91	130.856
YKL192C	375.347	367.531	362.883	347.199
YBR296C	13.9018	35.5204	29.9462	7.93143
YNR034W	864.441	514.45	412.335	549.108
YPL096W	24.4374	23.9756	25.0722	19.0896
YCR034W	657.94	547.879	576.193	575.764
YER074W	13.8983	13.8732	20.6232	14.3082
YBR172C	8.06579	7.06809	7.77116	6.80594
YJR099W	597.278	779.617	790.275	750.229
YHR023W	19.2431	27.1166	29.4164	27.6707
YEL056W	23.9659	31.9471	28.0167	28.903
YER007C-A	89.5666	74.0904	89.3807	93.5447
YPR176C	36.6922	31.1165	39.9127	37.0248
YJL123C	137.862	123.882	121.247	107.223
YEL015W	33.3349	34.9134	35.146	36.4884
YNL095C	94.5471	115.595	105.397	103.553
YOR211C	107.266	119.233	122.108	109.795
YDR292C	48.3966	64.0465	65.0466	55.0213
YAL042W	25.0089	24.5525	21.462	25.8766
YLR208W	78.2902	63.1946	71.7869	72.9418
YDL159W	18.5737	22.0358	26.5275	21.8235
YBR242W	36.5453	18.9833	21.2725	18.1231
YJR050W	24.2576	23.593	23.0252	21.0475
YDL073W	17.6614	22.166	20.5501	20.5646
YDL045W-A	215.162	297.331	251.82	261.116
YNL094W	14.1919	12.2775	11.9703	13.34
YJR143C	22.396	15.4323	18.2172	22.1442
YPL002C	69.6862	84.2873	80.0177	69.8025
YMR194C-B	33.0543	44.7026	52.4626	44.0996
YLR074C	27.4184	37.4042	39.8287	33.8724
YGR132C	137.931	95.3266	119.568	111.206
YDR436W	49.0792	71.2265	68.3304	62.1375
YDR062W	118.132	114.932	117.199	128.216
YAL028W	8.25783	6.71856	8.03945	6.37983
YML067C	38.2128	41.6821	39.1343	39.8739
YER104W	43.5647	42.5739	45.9672	44.6723
YDR194C	22.5851	22.2473	22.3515	19.691
YKL142W	3771.68	4877.5	4458.17	4461.48
YOR058C	76.7271	121.254	112.825	98.6617
YGR023W	6.54534	6.66965	5.47922	5.76791
YDR228C	20.5502	18.9692	18.4309	18.8716
YGL223C	8.24617	4.54888	7.11804	4.35154
YLR132C	7.64881	7.9178	4.87844	3.72798
YJL196C	43.9259	29.0336	39.1576	38.6853
YGR052W	11.5157	11.1118	14.5696	10.7214
YJL153C	516.751	320.006	463.467	385.384
YBR010W	1010.33	1138.2	1096.06	1116.98
YLR442C	4.62309	4.33508	3.67621	3.91291
YKL042W	1114.75	1654.32	1526.84	1465.71
YGR166W	12.6652	16.9804	13.6151	16.8069
YGR010W	21.2857	11.4134	15.9062	16.3134
YGL190C	50.0831	49.596	58.7333	56.6487
YJL176C	60.0074	50.9143	57.1751	55.1519
YER133W	799.615	908.774	906.296	940.336
YCR005C	1251.45	1159.68	1595.29	1220.23
YOL133W	141.688	128.191	122.824	137.251
YGL153W	41.1275	40.1907	42.8173	35.4092
YJL171C	58.4949	60.473	47.0911	61.4438
YML057W	67.8147	61.3228	60.3723	58.4706
YNL281W	96.6804	69.0555	83.6269	98.551
YAL013W	58.0104	65.2099	55.8727	54.4831
YPL206C	159.962	142.101	150.717	146.477
YDR325W	34.7398	33.8569	37.4261	37.502
YMR152W	214.006	202.518	220.343	208.355
YJR040W	5.98514	5.73487	8.28357	5.31728
YBL016W	13.6189	20.879	19.2258	17.2846
YOR267C	117.012	145.268	148.219	147.523
YLR151C	115.516	92.3296	115.32	111.055
YAL008W	103.577	99.2697	100.939	116.106
YPL006W	33.7167	31.5753	36.8104	32.5392
YJL133W	15.8097	14.5473	19.2066	12.9649
YNR067C	1.9927	1.22138	0.974715	2.23456
YLR248W	192.903	234.859	237.333	234.682
YDL202W	52.3214	81.3392	79.1045	73.418
YJR138W	14.3486	18.3809	19.2687	20.6575
YBR126C	440.186	465.855	438.702	436.768
YOR150W	66.7751	61.9317	67.7642	60.637
YML042W	422.154	423.541	505.478	432.756
YPL004C	325.561	248.371	265.353	223.233
YHR135C	35.1744	48.0074	45.4404	48.5767
YCL012C	51.0697	43.1477	35.5833	52.7104
YMR003W	14.7967	15.3587	15.1233	17.7384
YHL015W	49.1111	35.4991	43.2045	64.3807
YLR243W	22.7583	25.9734	27.8695	29.0934
YLR007W	9.6267	12.6916	11.32	7.96753
YLR357W	11.3833	8.32393	8.82819	7.71398
YMR205C	77.1797	87.812	86.7307	82.7572
YAL049C	101.967	59.0783	76.8219	84.5611
YOR008C	81.3157	61.2637	67.6899	62.3135
YBR009C	976.779	743.18	826.661	953.583
YHL003C	35.1053	24.461	28.4262	23.3793
YDR238C	149.68	130.031	147.291	139.107
YGL181W	142.969	219.895	211.056	215.359
YLR145W	16.7674	22.4741	22.1381	27.755
YDL226C	138.673	139.947	146.706	151.694
YER128W	23.7824	19.6788	23.266	15.6876
YML078W	310.147	327.865	325.976	301.048
YJL143W	71.2483	58.853	58.8789	72.163
YKL204W	81.6244	104.245	95.6137	97.8262
YDR196C	568.783	725.813	712.357	671.246
YBR278W	41.7603	55.6326	54.3074	57.4925
YER080W	37.9753	27.9023	34.791	30.8592
YNL267W	15.6732	23.3119	18.159	19.0229
YMR038C	57.3282	50.1446	56.1122	46.1216
YDR460W	64.4422	95.9181	103.605	91.2791
YGL066W	32.8761	32.3635	30.9811	28.9107
YDL070W	42.9746	30.6563	31.0199	32.0595
YDR339C	35.5632	42.2045	31.1072	44.9958
YJL058C	2.41742	2.9432	2.28272	1.7903
YDR255C	76.7714	67.5543	75.6401	60.8539
YMR228W	7.33143	5.41429	8.21154	9.41257
YKL129C	14.222	9.43364	11.2222	8.47959
YGL001C	69.6177	86.7636	88.3279	86.3769
YNL271C	19.4309	15.0741	16.9507	16.6329
YOR099W	501.272	482.286	529.059	499.739
YKL048C	15.2986	13.6051	14.801	12.3177
YPL227C	55.2023	69.8212	70.7496	76.9739
YOR160W	8.70022	5.5585	5.74721	5.5277
YPL144W	8.48056	3.63858	5.36827	6.15344
YDR107C	20.9857	19.7157	21.4992	20.1128
YMR234W	18.5511	16.7125	20.8575	19.302
YML086C	88.0145	103.424	105.049	105.469
YDR061W	28.5678	35.0743	36.9256	30.9468
YCL026C-A	10.2582	10.4049	15.1961	8.70933
YFR017C	147.872	187.446	181.354	161.957
YMR060C	40.1928	38.3165	40.2667	41.0017
YPL127C	1035.21	1324.24	1195.36	1238.24
YPR137W	0.727527	0.605179	0.340912	1.43284
YOL017W	20.3803	19.1996	23.0986	24.7119
YNL199C	14.199	16.5356	16.8695	16.9548
YOR059C	33.9326	34.6938	33.4495	36.1652
YOL119C	29.7449	23.3715	30.5633	26.7991
YDR414C	7.7219	8.21068	6.42399	7.15319
YOR054C	30.4255	41.5095	35.8776	38.9082
YLR189C	19.144	23.1475	25.15	23.7483
YOL012C	387.028	376.668	383.752	400.975
YHR153C	199.756	151.714	190.624	176.175
YMR183C	47.5649	18.2212	17.5636	21.1783
YPL089C	16.6767	18.2967	14.6831	20.3509
YHR152W	571.673	701.018	647.129	689.297
YLR154C	53.1494	76.633	70.5651	78.507
YOL077C	9.10249	3.69782	2.08307	4.51019
YJL204C	14.5174	12.9044	16.8698	16.4366
YCR009C	253.018	251.316	265.896	249.93
YGR005C	65.7393	56.8462	60.4766	52.2756
YER112W	148.402	148.476	145.022	164.515
YDR080W	18.5832	22.2597	20.77	19.2977
YPL164C	58.1576	58.5758	58.0707	64.1795
YOR138C	24.5504	31.5729	31.4776	28.0019
YCR067C	36.6701	28.1576	33.0602	35.8799
YML028W	540.653	412.93	432.861	420.747
YIR014W	15.2338	6.91587	10.7278	11.326
YNL044W	1345.21	1464.51	1441.55	1434.53
YJR133W	35.1532	35.2915	25.8447	28.4854
YLR251W	15.2033	18.0819	14.8546	15.811
YBR264C	283.094	281.626	282.948	273.819
YBR273C	114.605	107.897	102.812	110.581
YPL091W	46.7826	42.6312	47.2163	46.8126
YAL023C	77.9645	70.4065	86.9461	90.6914
YBR159W	253.662	273.326	279.651	276.992
YDL090C	9.3635	10.5789	11.9187	12.0856
YBR214W	102.803	87.5132	90.5909	80.5442
YPR021C	4.62976	3.64506	3.99262	4.65832
YBR227C	11.8375	6.55816	9.80139	9.65054
YER074W-A	127.371	96.5169	114.464	141.046
YBL038W	105.966	151.107	137.437	151.102
YBL059C-A	56.9388	39.4873	46.8666	47.3069
YKL113C	12.8481	13.4847	13.701	11.9278
YBL017C	34.0304	26.3917	31.1144	26.5985
YGL014W	38.9813	44.4713	40.0163	41.8877
YER033C	116.41	159.737	150.33	144.94
YDR388W	119.85	111.806	117.035	104.589
YOL104C	236.712	149.613	193.214	172.064
YHR203C	15.2274	11.3604	18.2102	14.9097
YPL200W	244.183	163.964	207.246	181.198
YOL093W	1.0507	2.44722	1.37858	3.42379
YGL082W	53.9202	45.1965	42.6077	46.6468
YGL173C	27.0531	21.0626	20.8599	21.3763
YDR311W	52.0333	59.9502	59.7215	59.1899
YDR475C	15.7216	20.7343	21.4503	21.2195
YPL234C	267.641	271.452	268.753	262.275
YKL077W	107.748	97.0753	93.5044	94.4117
YMR209C	9.72788	11.6349	13.2234	10.5444
YOR147W	27.9776	32.3593	32.9914	29.5593
YBR120C	24.5615	27.6656	24.6537	21.1947
YOR373W	7.14689	8.85997	9.64177	8.37929
YHR111W	20.6517	17.9978	17.3463	20.7404
YNL161W	14.1792	12.4072	14.1328	15.0217
YBR111C	127.107	75.5937	82.8513	93.2673
YBR229C	19.0902	8.46241	12.9277	11.8857
YOL027C	14.0309	7.86733	9.4319	9.24833
YLR138W	125.528	156.875	152.695	143.43
YNL138W-A	46.2373	36.5748	41.9701	53.5756
YIR022W	117.88	140.451	128.888	135.062
YDR320C-A	105.38	120.191	100.966	93.9481
YBR072W	236.81	338.708	314.776	340.091
YJR074W	28.9339	21.902	28.7885	30.0981
YKL088W	106.708	144.433	142.789	142.496
YNL156C	195.356	208.825	214.722	213.396
YPR013C	12.7523	17.101	21.3371	20.8256
YPL270W	7.56005	7.73698	8.34948	8.03938
YMR136W	82.9468	72.4476	87.1243	80.2105
YDL019C	33.4812	38.0361	38.6497	32.7131
YGR030C	15.7409	9.16563	14.0403	10.3832
YGL139W	22.5755	11.1328	10.9347	12.1654
YIL161W	69.8406	94.6825	88.0206	83.1879
YMR044W	41.0373	48.8199	45.5596	48.4252
YDL139C	10.1609	5.25913	9.56671	6.72107
YDL125C	644.962	428.373	519.493	551.865
YGL180W	137.061	125.249	137.383	136.518
YDR057W	21.7984	18.0776	23.1116	23.7324
YBR213W	25.0636	26.5586	23.4539	25.1863
YJL206C	3.11657	4.809	5.87808	5.07778
YDL222C	118.929	62.4294	53.8375	40.3118
YPL133C	17.1252	25.7537	24.3269	27.378
YCR017C	29.3441	45.8034	48.1263	45.8938
YCR086W	154.89	156.067	159.413	151.078
YKL193C	36.8214	28.5872	31.5762	30.7654
YDR390C	52.9125	44.9924	46.5276	50.1749
YMR083W	285.305	328.112	318.312	317.031
YDL099W	31.8291	18.95	26.5897	28.0136
YCL057C-A	236.958	214.916	220.343	193.36
YKL058W	70.4359	100.906	99.0168	98.7863
YFL049W	23.6415	25.6448	20.0122	19.8329
YDL040C	41.9944	36.6989	38.904	45.8905
YNL290W	47.7131	46.5826	59.0327	39.7908
YLR381W	1.85477	1.78435	2.29248	1.41496
YGR071C	35.8753	43.7724	44.3156	43.2463
YKR019C	159.21	201.949	208.935	189.61
YEL064C	39.8429	47.1268	47.1139	38.5078
YDL004W	223.78	248.717	267.001	229.796
YDR415C	26.4375	17.5662	22.8766	23.7833
YPL158C	152.289	169.231	173.105	177.02
YMR258C	40.4344	43.698	51.7552	50.0006
YNL073W	3.51467	4.57459	4.52101	5.31182
YNL210W	86.4825	55.5665	62.4535	52.6129
YLR038C	304.986	305.933	348.22	257.081
YER048C	88.5347	94.8127	93.248	82.8323
YPL229W	62.5982	79.433	67.475	65.5018
YNL234W	8.77118	5.93105	9.28085	7.97871
YDR170C	20.6819	20.2344	21.1859	21.0127
YGL098W	65.986	83.669	63.5122	78.5491
YLR378C	127.647	85.9627	97.915	101.592
YKR037C	59.4561	49.5615	46.9882	55.691
YER045C	8.94305	9.55874	9.37629	7.06276
YDR338C	32.7073	48.3065	42.8393	37.2558
YPR079W	81.1189	120.956	105.215	107.048
YDL055C	2273.68	1523.61	1553.63	1644.35
YCL029C	10.3942	11.7862	15.7014	12.6842
YAL046C	61.6497	94.1463	80.7606	63.416
YMR079W	2079.9	2392.53	2267.05	2310.23
YIR038C	232.992	185.568	170.125	177.219
YPR006C	235.078	223.714	260.652	203.77
YPL248C	4.8374	5.24225	5.87679	7.49418
YOL115W	11.9233	6.52737	6.35122	8.81283
YOR329C	26.7305	30.8149	29.4479	32.9936
YJL136C	47.4176	58.1791	41.6615	58.3671
YER147C	19.8908	20.8366	18.002	20.5158
YLR083C	57.6674	49.0486	46.8277	50.0018
YJR093C	18.1335	15.8926	21.6664	14.9949
YOR106W	90.0755	125.98	124.479	115.351
YLL029W	860.365	684.96	745.026	765.323
YLR117C	24.1347	19.9756	21.0165	19.2291
YGR136W	220.199	330.134	309.671	294.178
YER055C	80.1543	105.887	90.5829	100.717
YJR019C	47.8076	49.1728	40.4439	43.9538
YNL298W	5.95399	4.97602	6.43337	5.61853
YLL007C	8.46743	6.53931	6.82176	6.81416
YEL061C	67.7326	72.1119	69.8859	68.7792
YMR315W	50.2504	36.9812	38.3454	41.7671
YLR441C	57.8225	42.9031	52.018	55.9569
YDR498C	16.1346	14.1845	18.8519	14.274
YNR039C	45.0999	50.3476	57.2612	55.4153
YER168C	110.896	179.531	163.779	174.725
YBR103W	24.3258	20.532	24.1572	25.8724
YBR109C	267.65	192.256	213.949	225.509
YBR234C	61.049	56.9498	60.1954	56.7419
YDR505C	359.27	439.358	418.705	394.526
YEL040W	8.37272	7.65044	10.7038	12.2693
YBR243C	46.9755	58.4572	58.9929	61.3974
YCL034W	167.579	182.947	187.362	184.393
YGL097W	31.9604	22.7375	28.0103	29.7692
YLR135W	15.6386	15.6367	18.567	16.6302
YNL152W	6.3484	4.81412	5.00412	4.62583
YJR094W-A	29.1836	28.4749	22.4224	25.7019
YPL240C	782.067	473.944	621.796	563.917
YCR036W	31.7232	33.5269	37.4924	38.8393
YEL027W	796.707	746.628	775.553	850.091
YOL016C	29.0583	18.4868	22.7992	23.0989
YNR037C	52.7803	66.1225	60.332	56.1268
YKR101W	66.0537	79.7727	79.3865	80.9233
YDL149W	29.2603	25.368	29.7395	26.1204
YMR216C	42.1443	40.3254	44.5058	43.0974
YFR024C-A	81.0365	70.003	79.2768	75.1698
YHR157W	92.1963	71.1676	91.1497	69.9494
YPR084W	13.9664	10.7409	12.8215	15.5225
YIL131C	27.7368	37.6367	33.4407	30.1067
YGL192W	55.9929	42.7021	48.7604	51.6692
YNL219C	567.084	605.486	600.07	600.999
YNL071W	724.644	964.243	909.11	839.928
YGL191W	782.545	647.984	711.965	651.435
YAL054C	4470.63	3683.71	4205.02	3749.36
YOL135C	9.92733	6.93661	7.44297	3.91031
YDR511W	28.7893	55.29	45.2835	51.9067
YCR091W	6.48888	4.01749	3.5025	2.1618
YPR091C	19.244	18.3929	19.532	18.353
YBR123C	28.2409	38.7422	39.4719	34.1343
YJL149W	104.696	85.3791	99.907	99.9525
YJL194W	9.67413	5.29372	7.77381	5.84316
YJL102W	22.5276	20.6191	23.0573	20.1154
YIL002W-A	231.466	282.967	249.302	226.592
YMR302C	45.3145	38.2473	46.9701	41.5089
YER017C	25.9607	22.2911	25.2498	24.3781
YHR121W	80.8841	106.568	109.422	113.399
YDR262W	67.3646	73.1497	68.9271	57.3311
YJL112W	7.45621	8.39379	7.79013	6.95672
YJR080C	26.7164	26.4639	22.1602	22.8997
YNL126W	36.6915	42.4864	45.2942	39.79
YJL053W	30.7086	30.3605	36.5489	31.0702
YGR106C	162.671	154.551	167.368	175.421
YCR052W	14.891	11.4165	13.9749	14.3082
YCR020C-A	40.0546	30.1256	36.4957	28.2377
YFL005W	402.168	404.718	443.898	424.51
YDR254W	14.6897	10.9974	10.3252	14.4655
YPR066W	12.1326	15.0871	16.4133	15.2058
YGR257C	35.6755	50.2421	49.8924	55.1101
YLR261C	109.981	128.08	149.253	137.839
YGL121C	113.005	157.921	161.212	141.628
YBR140C	13.3032	12.263	12.6402	13.4087
YMR278W	37.3353	28.0225	31.7386	28.1232
YIL115C	67.5086	65.2712	71.1517	69.4083
YCR077C	74.4742	60.8404	58.5799	59.5322
YBR033W	11.5157	10.4306	13.5004	10.7443
YGR215W	63.2731	69.2644	71.2569	80.886
YKL167C	394.755	480.174	488.169	482.514
YBR269C	331.923	481.21	442.273	405.69
YLR352W	26.3049	25.443	24.5269	24.5428
YDR219C	313.067	369.999	364.603	328.131
YPR088C	91.2212	82.9823	88.1613	98.0145
YDL028C	289.284	403.763	380.519	369.823
YML070W	106.597	66.1044	87.3572	92.3431
YGR016W	85.526	93.3264	104.557	83.5572
YOL004W	67.7506	74.9217	79.638	85.8631
YDL195W	45.9159	37.5908	45.9361	44.5984
YER053C	10.6551	11.9313	12.9943	14.3812
YHL048W	51.2163	45.0113	51.651	46.2481
YPR052C	1065.98	742.123	739.297	621.187
YHR182W	20.596	17.5951	18.9852	23.3635
YPL065W	37.439	26.16	28.5133	26.8589
YGL254W	50.7925	66.3354	66.3277	61.5963
YPR004C	264.153	357.139	350.03	345.494
YNL133C	16.8249	20.8999	17.9872	13.5891
YBR005W	45.4099	41.131	33.7491	39.4293
YIR036C	90.1435	84.9166	84.1122	79.8525
YER117W	41.4761	34.0952	38.9468	52.5934
YPL183W-A	113.601	140.451	109.746	122.872
YGR244C	1364.39	1567.06	1664.61	1530.28
YJR031C	8.49791	4.29647	4.98565	5.81876
YJR104C	210.695	198.181	199.591	233.06
YJR078W	85.1738	143.069	128.376	134.35
YOL098C	34.2756	20.5509	27.5815	25.4485
YER134C	21.7278	17.7123	17.8175	20.4235
YPR073C	187.738	164.801	183.102	175.834
YNR035C	84.4961	73.2818	73.2852	68.8118
YPL153C	2.15381	1.67217	0.941972	1.97953
YOR198C	111.71	78.056	91.7107	92.0039
YNL240C	28.1793	35.5158	30.8107	30.1189
YDR052C	71.9522	71.7525	78.2114	75.8502
YER113C	5.53156	4.68499	5.04007	5.88228
YPL184C	103.445	123.792	126.018	136.678
YER123W	181.059	221.344	201.207	208.916
YBL026W	278.044	269.098	318.917	257.318
YBR058C	23.0465	12.6716	15.9453	17.4252
YHR004C	27.5082	26.6959	29.9295	28.054
YNL242W	84.8121	108.829	109.501	102.12
YDR045C	6.96004	5.89484	15.2199	8.723
YNL238W	44.397	61.1497	57.6495	58.275
YDR186C	32.8828	42.5143	45.492	39.3616
YJR042W	17.6309	12.4859	11.028	13.9349
YKR006C	31.0219	31.2006	35.4604	36.2288
YGR181W	107.123	131.769	115.662	106.566
YNL084C	140.282	146.096	146.323	141.702
YML115C	16.0684	10.266	11.1025	11.3279
YJR076C	79.9702	74.6736	75.5143	74.7142
YDR089W	28.7893	45.5966	44.9574	45.3354
YCL040W	107.855	103.717	113.214	103.369
YGR108W	844.061	1127.6	1124.7	1064.09
YGR271W	6.73917	4.33716	5.36476	6.00124
YLR373C	79.1215	89.7853	85.5105	83.4538
[truncated: 3,372 more rows]

## Sheet: description
RPKM values from two biological replicate ribosome profiling experiments with unmarked dbp1∆ strain during meiosis
samples were taken at 6h following transfer to SPO media
