# Supplementary material for: Bidirectional promoter activity from expression cassettes can drive off-target repression of neighboring gene translation
Source: eLife journal article supplement (doi:10.7554/elife.81086), 2022-11-30
Supplement: supp [file elife-81086-supp-v1.zip]

A

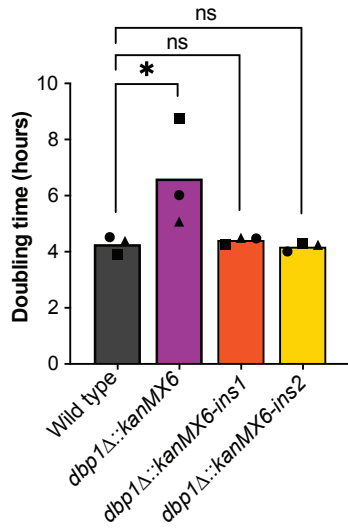

B 5' RACE products used for sequencing

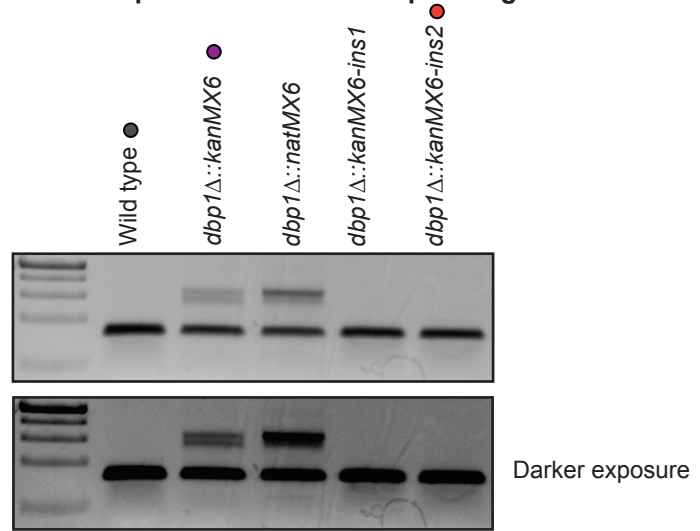

C

5' RACE ends of transcripts

| Sample                                                   | 5' end of transcript (50nt)                        | # clones | total |
|----------------------------------------------------------|----------------------------------------------------|----------|-------|
| Wild type (short transcript only)                        | ATACGGACATTGCTACAACCCCTGGTGAGACTGTTTCGATCATTTTCT   | 10       | 10    |
| <i>dbp1Δ::kanMX6</i> (long transcript)                   | ATTACTTCAGAGATGACCTTAAGTAACCTTCCCTTAAAATTGTTAAAGAA | 4        | 10    |
|                                                          | ACTTCAGAGATGACCTTAAGTAACCTTCCCTTAAAATTGTTAAAGAAGTC | 2        |       |
|                                                          | AGAGATGACCTTAAGTAACCTTCCCTTAAAATTGTTAAAGAAGTCGCGGG | 1        |       |
|                                                          | AAGTAACCTTCCCTTAAAATTGTTAAAGAAGTCGCGGGGTAATATTACG  | 1        |       |
|                                                          | AAAGAAGTCGCGGGGTAATATTACGTTGACAGTGATATTGGTTTTGAGA  | 2        |       |
| <i>dbp1Δ::kanMX6</i> (short transcript)                  | ATACGGACATTGCTACAACCCCTGGTGAGACTGTTTCGATCATTTTCT   | 5        | 6     |
|                                                          | ACGGACATTGCTACAACCCCTGGTGAGACTGTTTCGATCATTTTCTTT   | 1        |       |
| <i>dbp1Δ::natMX6</i> (long transcript)                   | ATTACTTCAGAGATGACCTTAAGTAACCTTCCCTTAAAATTGTTAAAGAA | 3        | 10    |
|                                                          | ACTTCAGAGATGACCTTAAGTAACCTTCCCTTAAAATTGTTAAAGAAGTC | 3        |       |
|                                                          | AGAGATGACCTTAAGTAACCTTCCCTTAAAATTGTTAAAGAAGTCGCGGG | 1        |       |
|                                                          | AAAATTGTTAAAGAAGTCGCGGGGTAATATTACGTTGACAGTGATATTG  | 1        |       |
|                                                          | AAAGAAGTCGCGGGGTAATATTACGTTGACAGTGATATTGGTTTTGAGA  | 1        |       |
| <i>dbp1Δ::natMX6</i> (short transcript)                  | GCGGGGTAATATTACGTTGACAGTGATATTGGTTTTGAGAAATCAAGA   | 1        | 7     |
|                                                          | ATACGGACATTGCTACAACCCCTGGTGAGACTGTTTCGATCATTTTCT   | 6        |       |
| <i>dbp1Δ::natMX6</i> (short transcript)                  | ACGGACATTGCTACAACCCCTGGTGAGACTGTTTCGATCATTTTCTTT   | 1        | 6     |
|                                                          | ATACGGACATTGCTACAACCCCTGGTGAGACTGTTTCGATCATTTTCT   | 6        |       |
| <i>dbp1Δ::DEG1-kanMX6-tDEG1</i> (short transcript only)  | AAAAAAATCATACGGACATTGCTACAACCCCTGGTGAGACTGTTTCGA   | 1        | 10    |
| <i>dbp1Δ::tDEG1-kanMX6-tCYC1</i> (short transcript only) | ATACGGACATTGCTACAACCCCTGGTGAGACTGTTTCGATCATTTTCT   | 5        |       |
|                                                          | ACGGACATTGCTACAACCCCTGGTGAGACTGTTTCGATCATTTTCTTT   | 3        |       |
|                                                          | CGGACATTGCTACAACCCCTGGTGAGACTGTTTCGATCATTTTCTTTT   | 1        |       |
