# Supplementary figures and images for: Bidirectional promoter activity from expression cassettes can drive off-target repression of neighboring gene translation
Source: eLife journal article supplement (doi:10.7554/elife.81086), 2022-11-30

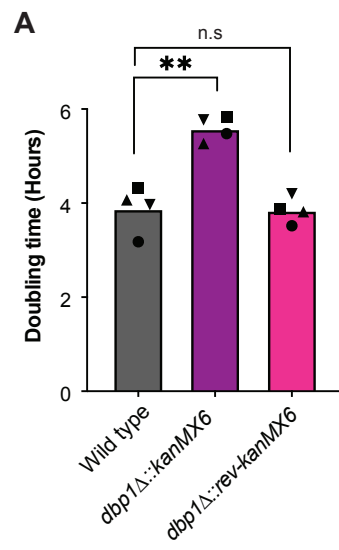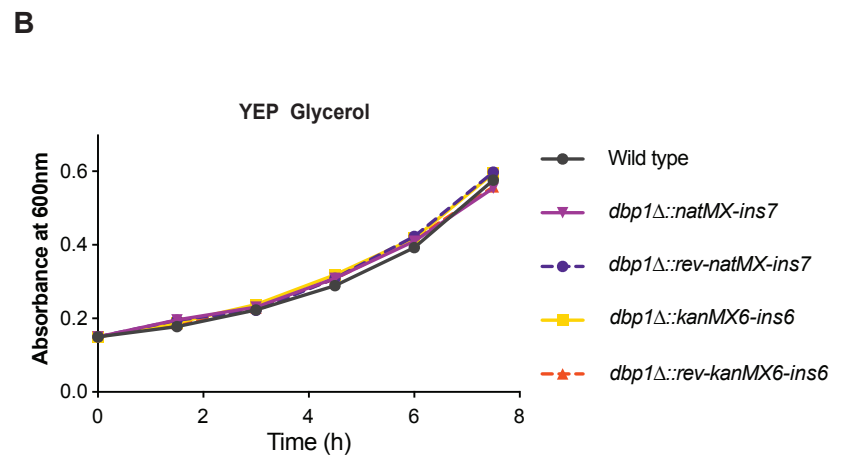

Supplement: supp [file elife-81086-supp-v1.zip]

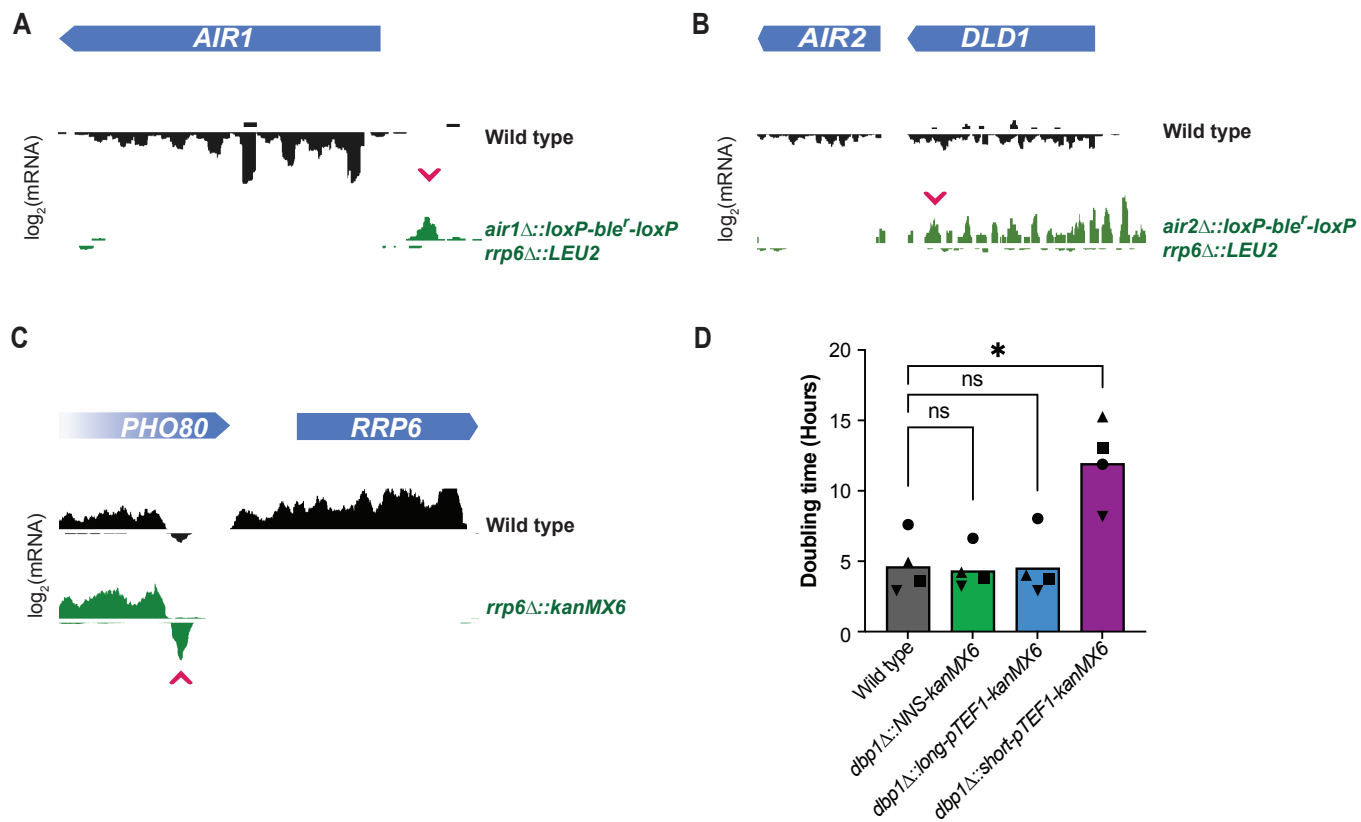

Supplement: supp [file elife-81086-supp-v1.zip]

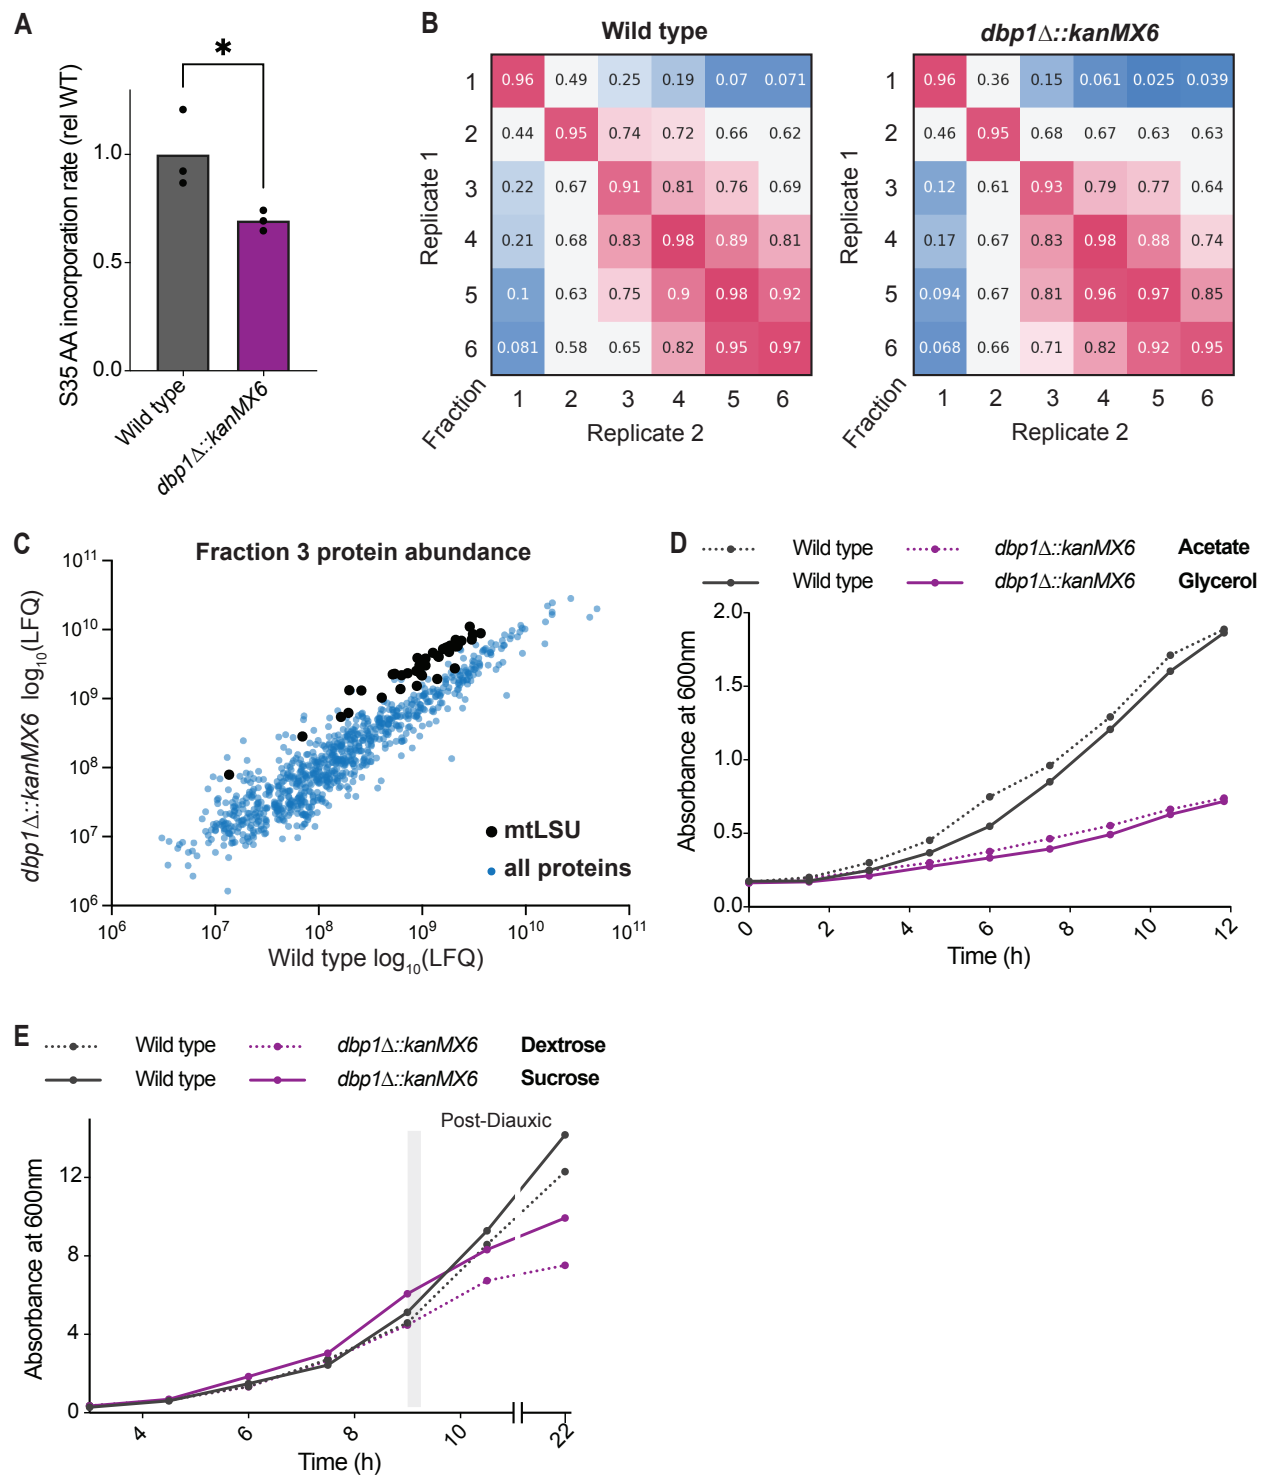

Supplement: supp [file elife-81086-supp-v1.zip]

A

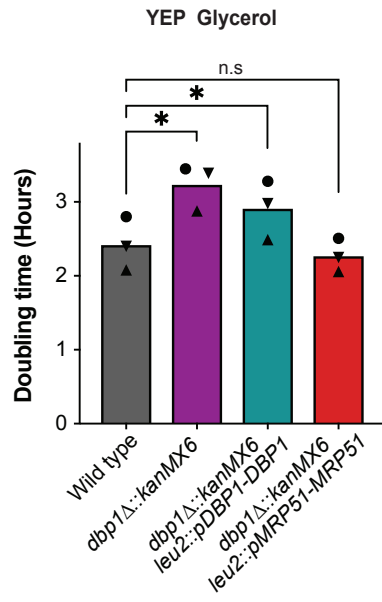

B

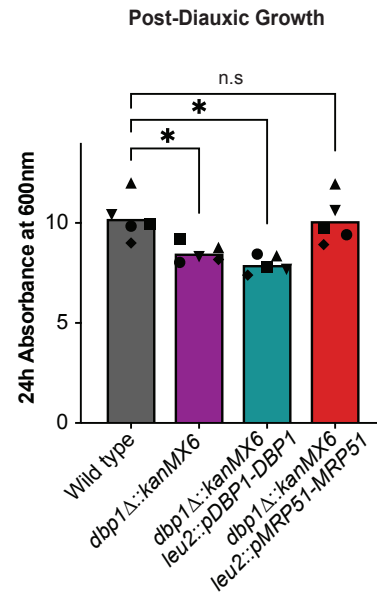

C

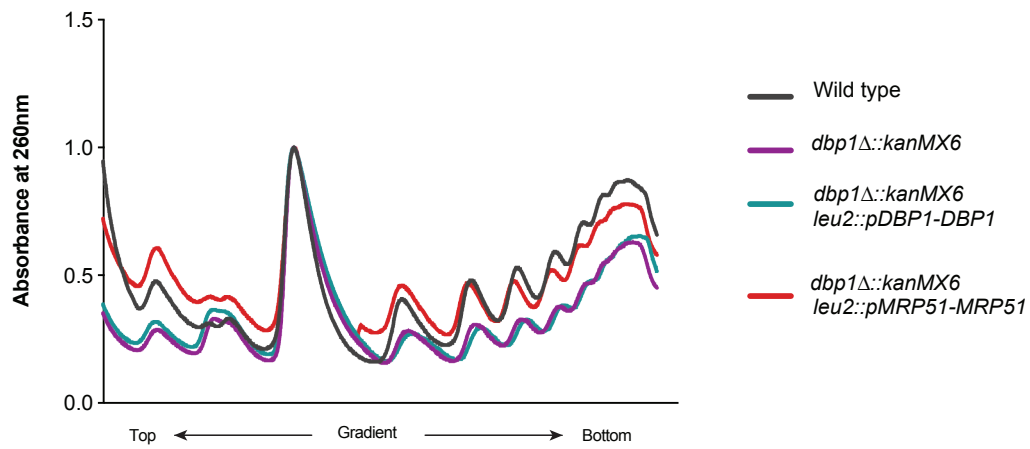

D

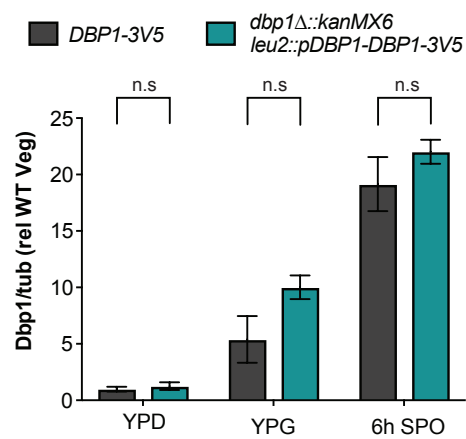

E

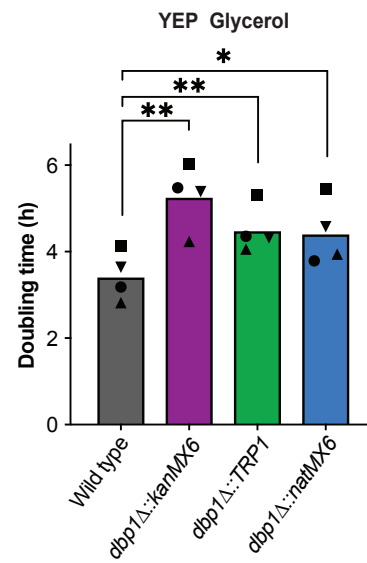

Supplement: supp [file elife-81086-supp-v1.zip]

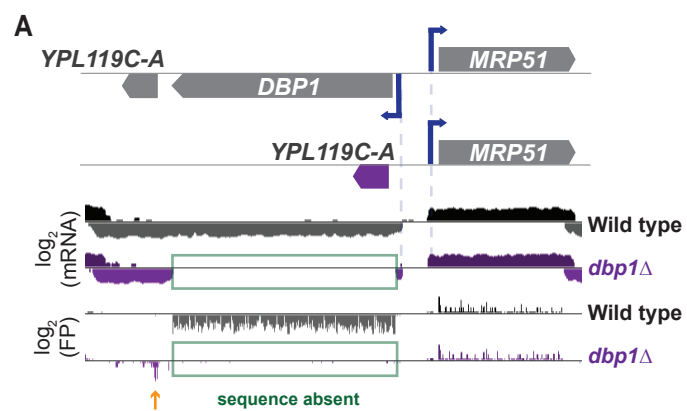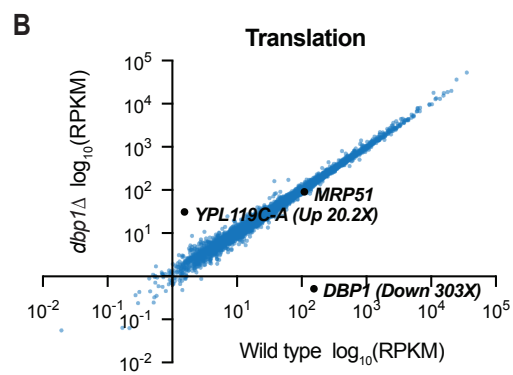

Supplement: supp [file elife-81086-supp-v1.zip]

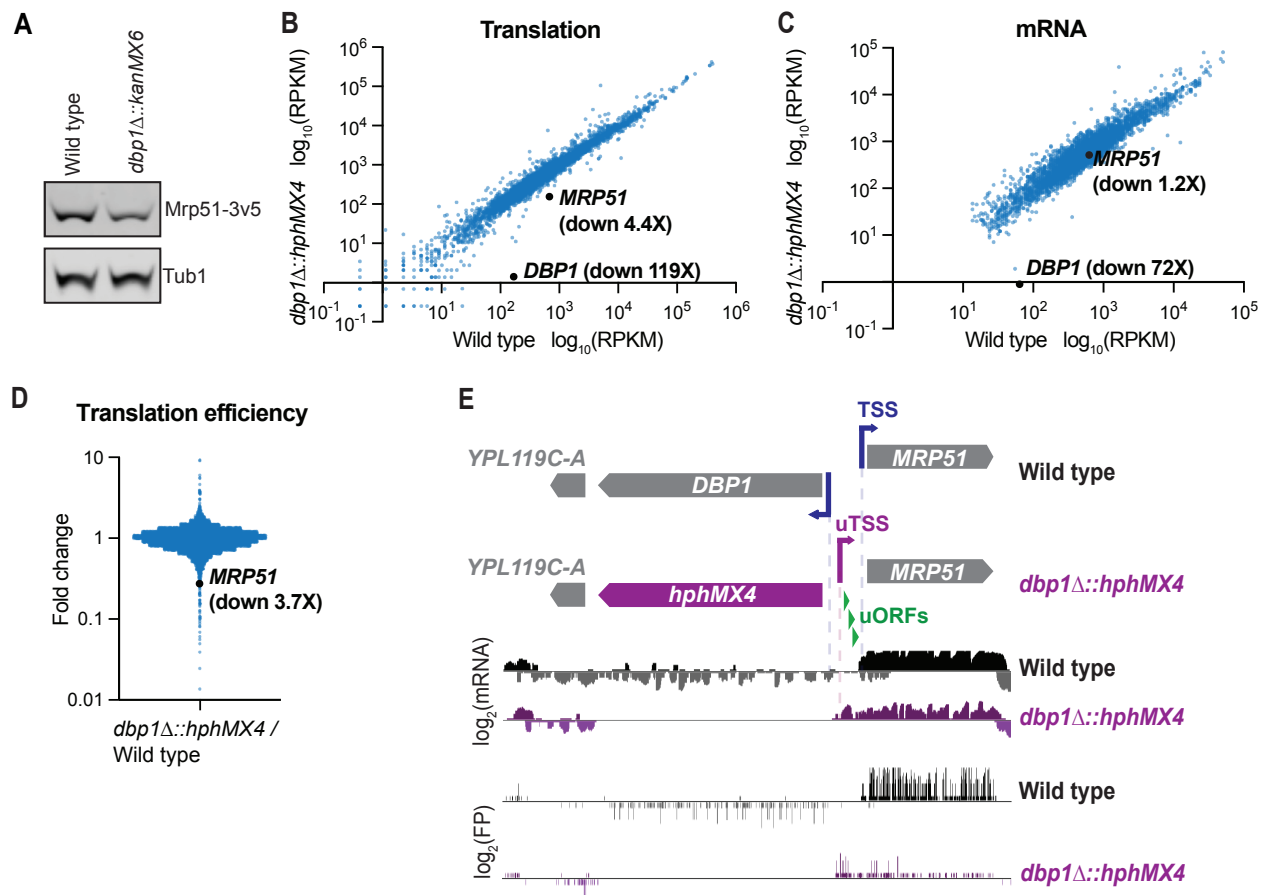

Supplement: supp [file elife-81086-supp-v1.zip]
